# Supplementary material for: Epithelial, metabolic and innate immunity transcriptomic signatures differentiating the rumen from other sheep and mammalian gastrointestinal tract tissues
Source: PubMed Central journal article supplement (PMC4793311; doi:10.7717/peerj.1762), 2016-03-08
Supplement: peerj-04-1762-s002.pdf [file peerj-04-1762-s002.pdf]

## Supplementary Figure S1

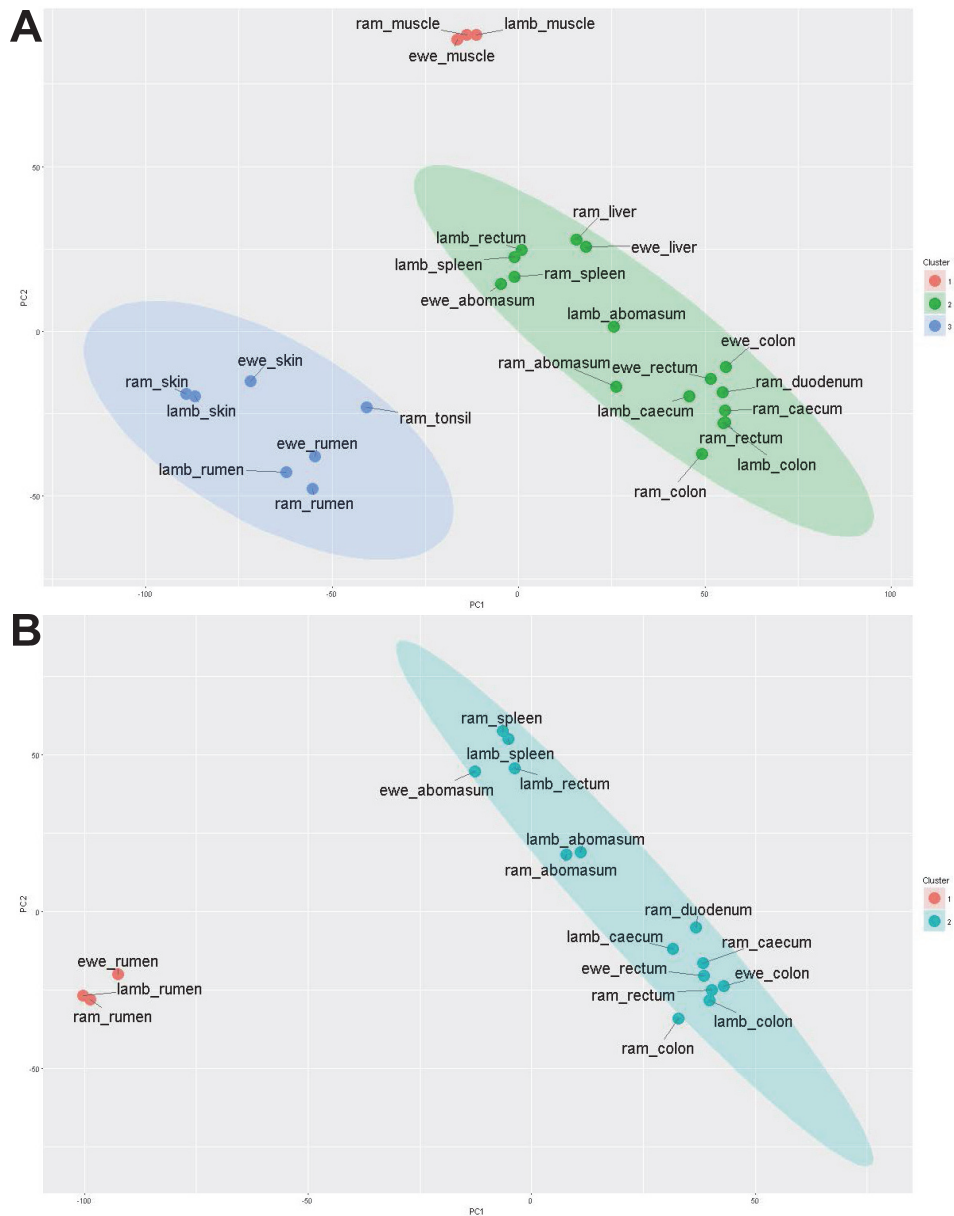

Figure S1. Raw output of PCA clustering of tissues. **A**: Three significantly separated clusters of total 26 studied tissues. **B**: Two significantly separated clusters of studied tissues without epithelial (skin and tonsil) and reference (muscle and liver) tissues. Cluster boundary significance testing is performed based on K-mean clustering and bivariate t-distribution using `stat_ellipse` package (<https://github.com/JoFrhwld/FAAV/blob/master/r/stat-ellipse.R>) and presented in `ggplot2` in R.

## Supplementary Figure S2

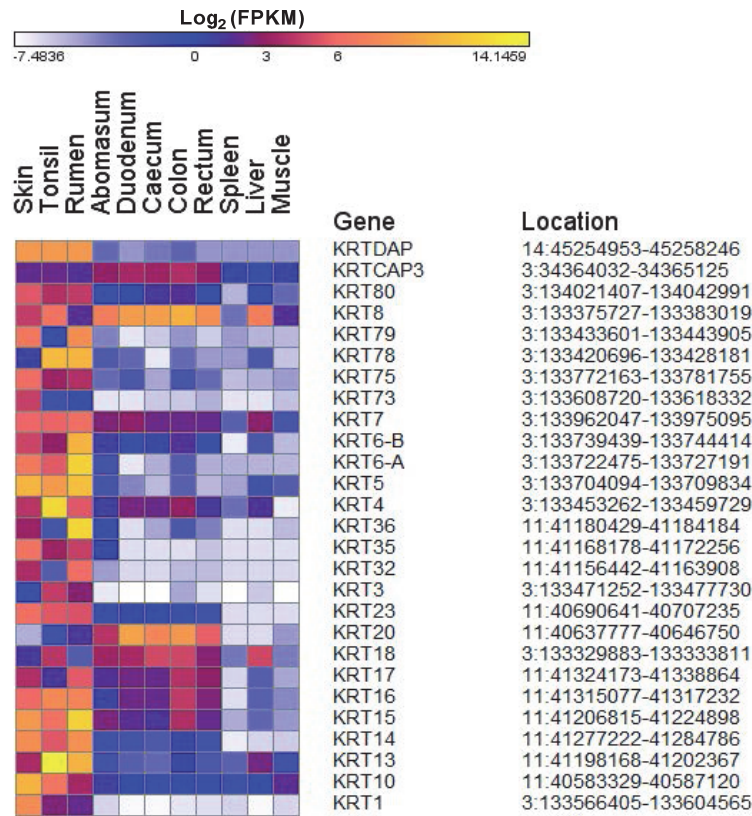

Figure S2. Expression profile of gastrointestinal related keratin genes. Keratin genes are selected based on their average count per million values in gastrointestinal tissues > 3.
