# Supplementary material for: Epithelial, metabolic and innate immunity transcriptomic signatures differentiating the rumen from other sheep and mammalian gastrointestinal tract tissues
Source: PeerJ. 2016 Mar 8;4:e1762. doi: 10.7717/peerj.1762 (PMC4793311; doi:10.7717/peerj.1762)
Supplement: Supplemental Information 1 [file peerj-04-1762-s001.xlsx]

## Sheet: Table S1_experimental_design
AnimalID	Sex	Age	Breed
UK18391307-143	Male	Adult>2years	Texel
UK183913 408	Female	Adult>2years	Texel
UK183913 1507	Female	Juvenile 8-9months	Texel
Housing: All the animals were housed indoors for 7-10 days between arrival on the experimental facility and being euthanased for tissue sampling.
Diet: All the animals were fed ad libitum on a diet of hay and 16% sheep concentrate nut during this period.

## Sheet: Table S2_P_FDR<0.01
PValue	FDR	ID	chr	Transcript Biotype	ensembl name	Description	skin_ave_cpm	tonsil_ave_cpm	rumen_ave_cpm	abomasum_ave_cpm	duodenum_ave_cpm	caecum_ave_cpm	colon_ave_cpm	rectum_ave_cpm	spleen_ave_cpm	liver_ave_cpm	muscle_ave_cpm	overall_logCPM	LR	Skin_logFC	Tonsil_logFC	Rumen_logFC	Abomasum_logFC	Duodenum_logFC	Caecum_logFC	Colon_logFC	Rectum_logFC	Spleen_logFC	Liver_logFC	Muscle_logFC	skin_logFPKM	tonsil_logFPKM	rumen_logFPKM	abomasum_logFPKM	duodenum_logFPKM	caecum_logFPKM	colon_logFPKM	rectum_logFPKM	spleen_logFPKM	liver_logFPKM	muscle_logFPKM
0	0	ENSOARG00000025192	1:123359533-123359748	protein_coding	KAP6-L	keratin-associated protein 6-1 [Source:RefSeq peptide;Acc:NP_001180328]	7.03068	-6.07322	-6.07322	-6.07322	-6.07322	-6.07322	-6.07322	-6.07322	-6.07322	-6.07322	-6.07322	4.76564	1569.86	14.7445	-0.63365	-0.077974	0	-0.63365	-0.648685	0.346116	-0.109462	-0.665763	0.421306	0.0165037	9.24158	-3.86233	-3.86233	-3.86233	-3.86233	-3.86233	-3.86233	-3.86233	-3.86233	-3.86233	-3.86233
0	0	ENSOARG00000025186	11:40814602-40815081	protein_coding	IIIB2A-like	LOC101112910/keratin high-sulfur matrix protein, B2A-like	6.51204	-6.07322	-6.07322	-6.07322	-6.07322	-6.07322	-6.07322	-6.07322	-6.07322	-6.07322	-3.69807	4.50122	1725.14	14.4356	-0.806976	-0.0579353	0	-0.806976	-0.744842	0.352115	-0.0990353	-0.669584	0.292443	4.40451	7.57093	-5.01433	-5.01433	-5.01433	-5.01433	-5.01433	-5.01433	-5.01433	-5.01433	-5.01433	-2.63918
0	3.63289e-306	ENSOARG00000019523	3:38286979-38287974	protein_coding	ASPRV1	aspartic peptidase, retroviral-like 1 [Source:HGNC Symbol;Acc:26321]	8.05973	0.790911	-0.67434	-2.57857	-3.15367	-3.68814	-3.60855	-2.89027	-1.70075	-1.61455	-4.00308	4.98546	1466.67	10.4643	2.95877	1.71992	0	-1.07824	-1.92622	-0.30323	-0.363682	0.618095	0.990083	-0.97637	8.06552	0.796694	-0.668558	-2.57279	-3.14789	-3.68235	-3.60277	-2.88449	-1.69497	-1.60877	-3.9973
0	0	ENSOARG00000017130	3:133897662-133903960	protein_coding	KRT2.11	Ovis aries hair keratin type II intermediate filament (KRT2.11), mRNA. [Source:RefSeq mRNA;Acc:NM_001199066]	7.91566	-6.07322	-6.07322	-6.07322	-6.07322	-6.07322	-6.07322	-6.07322	-6.07322	-6.07322	-5.03054	6.17412	1754.23	16.1511	-0.769696	-0.0704579	0	-0.769696	-0.738093	0.374254	-0.109773	-0.700977	0.369594	2.86807	7.38759	-6.60129	-6.60129	-6.60129	-6.60129	-6.60129	-6.60129	-6.60129	-6.60129	-6.60129	-5.55861
0	0	ENSOARG00000016883	3:133543311-133555872	protein_coding	KRT77	keratin 77 [Source:HGNC Symbol;Acc:20411]	8.59275	-2.54971	-5.09463	-5.38472	-6.07322	-6.07322	-6.07322	-5.31358	-6.07322	-6.07322	-6.07322	5.71745	1597.2	14.1026	3.15846	0.752016	0	-1.30092	-1.27506	-1.92119	0.104441	-1.24492	-1.9606	-1.78092	7.82891	-3.31355	-5.85847	-6.14855	-6.83706	-6.83706	-6.83706	-6.07742	-6.83706	-6.83706	-6.83706
0	0	ENSOARG00000014436	6:25056613-25070887	protein_coding			-2.4736	-6.07322	-3.14018	-4.55065	-3.15367	-3.70308	-2.95136	-5.06111	-4.94983	-4.67695	9.08924	5.99384	1915.29	2.19205	-2.94631	1.38784	0	0.874603	2.32713	1.57695	-0.0329272	-0.57511	0.341304	13.5909	-4.97032	-8.56994	-5.6369	-7.04737	-5.65039	-6.1998	-5.44807	-7.55783	-7.44654	-7.17367	6.59253
0	0	ENSOARG00000014162	1:123281552-123378489	protein_coding			7.32142	-6.07322	-6.07322	-6.07322	-6.07322	-6.07322	-6.07322	-6.07322	-6.07322	-6.07322	-5.03054	4.91647	1619.14	14.9236	-0.76143	-0.0531757	0	-0.76143	-0.701192	0.320853	-0.091471	-0.628787	0.265823	2.89431	8.45748	-4.93716	-4.93716	-4.93716	-4.93716	-4.93716	-4.93716	-4.93716	-4.93716	-4.93716	-3.89447
0	0	ENSOARG00000011858	12:35923121-35943445	protein_coding	METTL11B	methyltransferase like 11B [Source:HGNC Symbol;Acc:31932]	-2.63689	-2.54971	-2.5248	-2.77295	-2.63371	-3.31308	-3.71722	-5.03254	-3.88017	-6.07322	7.47528	4.31449	1615.26	-0.107022	0.346352	-0.00820097	0	0.258415	-0.778361	-0.299972	-1.95454	-1.37191	-4.45806	10.0622	-4.5318	-4.44462	-4.41972	-4.66786	-4.52862	-5.20799	-5.61213	-6.92745	-5.77509	-7.96814	5.58036
0	0	ENSOARG00000010045	4:101544228-101598085	protein_coding	AKR1D1	aldo-keto reductase family 1, member D1 [Source:HGNC Symbol;Acc:388]	-3.54732	-1.61384	8.82779	-3.52581	-6.07322	-5.24692	-4.33273	-4.29845	-6.07322	8.65887	-6.07322	6.40303	1810.97	-0.922404	1.03264	11.5309	0	-4.39357	-2.32053	-1.78549	-1.32502	-4.45263	11.4246	-4.37707	-5.67594	-3.74246	6.69917	-5.65443	-8.20185	-7.37555	-6.46136	-6.42707	-8.20185	6.53024	-8.20185
0	0	ENSOARG00000008316	6:83834645-83853787	protein_coding	TMPRSS11B	transmembrane protease, serine 11B [Source:HGNC Symbol;Acc:25398]	-4.56801	5.55072	7.55262	-5.38472	-6.07322	-6.07322	-6.07322	-6.07322	-6.07322	-6.07322	-5.04577	4.65162	1570.56	0.729177	10.5585	12.8241	0	-2.06518	-2.05916	-1.71217	-1.84412	-2.05221	-1.70293	1.0388	-5.24878	4.86995	6.87185	-6.06549	-6.754	-6.754	-6.754	-6.754	-6.754	-6.754	-5.72654
0	0	ENSOARG00000007941	1:122988317-122988574	protein_coding	KRTAP7-1	Keratin-associated protein 7-1 [Source:UniProtKB/Swiss-Prot;Acc:Q28580]	8.34697	-6.07322	-6.07322	-6.07322	-6.07322	-6.07322	-6.07322	-6.07322	-6.07322	-6.07322	-4.00308	6.28265	1761.76	16.1833	-0.642172	-0.0806194	0	-0.642172	-0.660395	0.357091	-0.11279	-0.680992	0.439044	3.8044	10.3015	-4.11867	-4.11867	-4.11867	-4.11867	-4.11867	-4.11867	-4.11867	-4.11867	-4.11867	-2.04852
0	0	ENSOARG00000003414	1:21417876-21467954	protein_coding	CYP4X1	cytochrome P450, family 4, subfamily X, polypeptide 1 [Source:HGNC Symbol;Acc:20244]	8.47969	-2.54971	-6.07322	-5.06132	-1.14024	-4.87186	-6.07322	-5.31358	-6.07322	-6.07322	-6.07322	5.40002	1701.75	12.9819	1.94987	-2.58595	0	3.39966	0.358216	-2.57802	-0.804651	-2.5848	-2.54946	-2.60004	7.72352	-3.30588	-6.82939	-5.81749	-1.89641	-5.62803	-6.82939	-6.06975	-6.82939	-6.82939	-6.82939
0	0	ENSOARG00000000820	20:15063505-15073864	protein_coding	APOBEC2	apolipoprotein B mRNA editing enzyme, catalytic polypeptide-like 2 [Source:HGNC Symbol;Acc:605]	-5.31763	-2.00718	-4.6961	-3.81038	-6.07322	-6.07322	-3.9354	-4.29845	-3.04737	-6.07322	8.22584	5.08528	1604.93	-1.94885	1.51913	-1.36245	0	-3.50319	-3.65532	0.129289	-0.719304	0.127733	-3.58103	11.596	-4.75059	-1.44014	-4.12906	-3.24334	-5.50618	-5.50618	-3.36836	-3.73141	-2.48033	-5.50618	8.79288
0	0	ENSOARG00000000091	11:40786373-40786669	protein_coding	KAP3.2	Keratin-associated protein 3-2 [Source:UniProtKB/Swiss-Prot;Acc:Q6S343]	7.60649	-6.07322	-6.07322	-6.07322	-6.07322	-6.07322	-6.07322	-6.07322	-6.07322	-6.07322	-4.72552	5.62905	1699.55	15.5989	-0.554019	-0.0966379	0	-0.554019	-0.626247	0.374735	-0.124519	-0.704978	0.552379	3.64082	9.35795	-4.32176	-4.32176	-4.32176	-4.32176	-4.32176	-4.32176	-4.32176	-4.32176	-4.32176	-2.97406
2.68183e-306	2.32873e-303	ENSOARG00000007993	1:31200958-31272287	protein_coding	C8A	complement component 8, alpha polypeptide [Source:HGNC Symbol;Acc:1352]	-4.56801	-0.647009	-6.07322	-6.07322	-6.07322	-5.24692	-5.51486	-6.07322	-6.07322	9.48963	-6.07322	5.78159	1453.57	2.58236	6.28242	0.00309424	0	-0.126921	2.01262	1.73494	-0.00178432	-0.0432328	16.541	0.0272166	-5.5046	-1.5836	-7.00981	-7.00981	-7.00981	-6.18351	-6.45145	-7.00981	-7.00981	8.55304	-7.00981
5.50416e-305	4.5622e-302	ENSOARG00000004823	14:45269740-45281711	protein_coding	DMKN	dermokine [Source:HGNC Symbol;Acc:25063]	9.16535	3.49087	2.68659	-1.82045	-3.15367	-1.68858	-4.46709	-1.12035	-1.42996	-4.67695	-2.04446	6.2021	1447.5	10.9694	4.82984	4.48877	0	-1.91239	-0.163189	-2.44437	0.768548	0.3132	-2.64772	-0.315814	8.51	2.83552	2.03124	-2.47581	-3.80902	-2.34393	-5.12244	-1.7757	-2.08531	-5.3323	-2.69981
2.68452e-304	2.12835e-301	ENSOARG00000021154	7:73801139-73870135	protein_coding	SPTB	spectrin, beta, erythrocytic [Source:HGNC Symbol;Acc:11274]	3.50114	2.18175	-0.326299	0.056535	1.04456	0.640196	0.98099	0.817687	-2.43926	1.72677	9.45848	6.37563	1444.31	3.29839	1.95078	-0.517159	0	0.810751	0.292548	0.779783	0.640017	-2.70131	1.6349	9.27618	0.696469	-0.62292	-3.13097	-2.74814	-1.76011	-2.16448	-1.82368	-1.98699	-5.24393	-1.07791	6.6538
6.52172e-304	4.95515e-301	ENSOARG00000002767	JH922719.1:1463-9214	protein_coding			-6.07322	-1.05091	-6.07322	-6.07322	-3.97458	-6.07322	-6.07322	-5.33913	-6.07322	9.47784	-6.07322	5.76777	1442.52	0.0375825	5.89323	0.0326322	0	2.81283	0.00368622	-0.0471701	1.80132	0.141844	16.4152	0.0642711	-7.88181	-2.8595	-7.88181	-7.88181	-5.78317	-7.88181	-7.88181	-7.14772	-7.88181	7.66925	-7.88181
1.09976e-303	8.02168e-301	ENSOARG00000015711	11:40811713-40812242	protein_coding	KRTAP1-4	keratin-associated protein 1-1 [Source:RefSeq peptide;Acc:NP_001153232]	6.48133	-6.07322	-6.07322	-6.07322	-6.07322	-6.07322	-6.07322	-6.07322	-6.07322	-6.07322	-6.07322	4.45421	1441.47	14.4233	-0.716291	-0.0732576	0	-0.716291	-0.702177	0.362069	-0.109378	-0.685804	0.388737	0.0454965	7.51343	-5.04113	-5.04113	-5.04113	-5.04113	-5.04113	-5.04113	-5.04113	-5.04113	-5.04113	-5.04113
5.62062e-303	3.942e-300	Addition45	1:102040656-102040886		PRD-SPRRII-like4		-6.07322	-6.07322	8.05253	-4.65081	-6.07322	-6.07322	-4.68455	-6.07322	-6.07322	-6.07322	-6.07322	5.10485	1438.19	-2.64215	-3.01552	12.6287	0	-3.01552	-2.9997	0.900061	-2.64707	-2.98144	-2.41293	-2.561	-3.95293	-3.95293	10.1728	-2.53052	-3.95293	-3.95293	-2.56425	-3.95293	-3.95293	-3.95293	-3.95293
7.87235e-303	5.31675e-300	ENSOARG00000009808	1:110762561-110763490	protein_coding	APOA2	apolipoprotein A-II [Source:HGNC Symbol;Acc:601]	-6.07322	-1.30509	-6.07322	-6.07322	-6.07322	-6.07322	-4.5159	-6.07322	-6.07322	9.11654	-6.07322	5.42776	1437.52	-0.209013	6.85867	-0.180296	0	1.11725	0.0597956	3.5742	-0.161714	-0.625299	17.5947	-0.370686	-4.3789	0.389232	-4.3789	-4.3789	-4.3789	-4.3789	-2.82158	-4.3789	-4.3789	10.8109	-4.3789
8.55665e-303	5.57252e-300	ENSOARG00000014888	5:44749186-44761128	protein_coding	LECT2	leukocyte cell-derived chemotaxin 2 [Source:HGNC Symbol;Acc:6550]	-6.07322	-0.480817	-6.07322	-6.07322	-2.2523	-6.07322	-6.07322	-6.07322	-6.07322	9.52754	-6.07322	5.97482	1437.35	-0.0216892	6.06726	-0.0109401	0	4.25884	-0.421804	0.133651	-0.0339219	-0.313364	16.7163	0.0899167	-4.94033	0.652077	-4.94033	-4.94033	-1.11941	-4.94033	-4.94033	-4.94033	-4.94033	10.6604	-4.94033
1.88563e-302	1.18567e-299	ENSOARG00000010560	X:90718124-90754117	protein_coding	F9	coagulation factor IX [Source:HGNC Symbol;Acc:3551]	-6.07322	-0.0732743	-6.07322	-6.07322	-6.07322	-6.07322	-6.07322	-5.31358	-6.07322	9.36163	-6.07322	5.69023	1435.76	-0.0879311	7.07988	-0.073836	0	0.0912501	-0.135083	0.152168	1.6853	-0.35801	16.8413	-0.118547	-7.10179	-1.10184	-7.10179	-7.10179	-7.10179	-7.10179	-7.10179	-6.34215	-7.10179	8.33306	-7.10179
6.57753e-293	3.99804e-290	ENSOARG00000008669	15:51622789-51628720	protein_coding	UCP3	uncoupling protein 3 (mitochondrial, proton carrier) [Source:HGNC Symbol;Acc:12519]	-5.31763	-6.07322	-6.07322	-4.37281	-6.07322	-6.07322	-3.68626	-6.07322	-6.07322	-6.07322	7.72348	4.53229	1391.56	-1.22984	-3.0073	-3.04559	0	-3.0073	-2.94922	1.62465	-3.04265	-2.87995	-3.18712	11.8181	-5.36027	-6.11587	-6.11587	-4.41546	-6.11587	-6.11587	-3.7289	-6.11587	-6.11587	-6.11587	7.68083
2.23648e-292	1.31556e-289	ENSOARG00000018030	1:163225584-163294479	protein_coding			7.23428	-2.54971	-5.3689	-3.24985	-3.97458	-4.87186	-4.97693	-4.29845	-4.94983	-2.2473	-6.07322	4.17949	1389.1	10.5689	0.67324	-2.10465	0	-0.866588	-0.896596	-0.431655	-0.706809	-1.62316	1.05489	-3.75826	7.47045	-2.31355	-5.13273	-3.01368	-3.73842	-4.6357	-4.74077	-4.06229	-4.71366	-2.01114	-5.83706
3.99389e-292	2.27589e-289	ENSOARG00000011319	3:92922848-92949860	protein_coding	ATP6V1B1	ATPase, H+ transporting, lysosomal 56/58kDa, V1 subunit B1 [Source:HGNC Symbol;Acc:853]	6.24767	7.13298	8.2712	-3.21329	-0.330975	-6.07322	-5.51486	-5.06111	-4.59047	1.43573	-4.41867	5.6872	1387.94	8.63764	9.02353	10.6558	0	1.54611	-5.04483	-3.00494	-2.19227	-1.87693	3.64997	-0.923357	4.31977	5.20508	6.3433	-5.14119	-2.25887	-8.00112	-7.44276	-6.98901	-6.51836	-0.492171	-6.34657
1.60292e-288	8.85737e-286	ENSOARG00000002913	4:12410438-12443145	protein_coding	PON1	paraoxonase 1 [Source:HGNC Symbol;Acc:9204]	-5.03705	0.91541	-6.07322	-6.07322	-6.07322	-5.24692	-6.07322	-5.06111	-6.07322	9.43116	-5.03054	5.88894	1371.24	2.56139	7.3385	0.030779	0	-0.644436	1.65569	0.0773952	2.60547	-0.188954	16.421	3.01711	-5.13196	0.820498	-6.16813	-6.16813	-6.16813	-5.34183	-6.16813	-5.15602	-6.16813	9.33625	-5.12545
4.47485e-287	2.39997e-284	ENSOARG00000011592	15:79280017-79288198	protein_coding	GLYATL2	glycine-N-acyltransferase-like 2 [Source:HGNC Symbol;Acc:24178]	6.97533	-6.07322	-6.07322	-6.07322	-6.07322	-6.07322	-6.07322	-6.07322	-6.07322	-6.07322	-6.07322	3.97121	1364.55	14.1014	0.68092	-0.017472	0	0.68092	0.415212	-0.0555617	0.00220536	0.160163	0.0857706	-0.114964	7.07075	-5.9778	-5.9778	-5.9778	-5.9778	-5.9778	-5.9778	-5.9778	-5.9778	-5.9778	-5.9778
4.04157e-283	2.10566e-280	ENSOARG00000001361	AMGL01128377.1:21-2627	protein_coding			-4.86102	-6.07322	-6.07322	-6.07322	-6.07322	-6.07322	-5.51486	-6.07322	-6.07322	-6.07322	7.00458	3.76353	1346.22	3.04727	-0.393029	0.0111706	0	-0.393029	-0.279983	1.77921	-0.00543593	-0.138817	-0.0526243	14.1195	-5.47172	-6.68392	-6.68392	-6.68392	-6.68392	-6.68392	-6.12556	-6.68392	-6.68392	-6.68392	6.39388
5.96568e-283	3.02178e-280	ENSOARG00000013739	3:213377306-213386555	protein_coding	TUBA8	tubulin, alpha 8 [Source:HGNC Symbol;Acc:12410]	1.31164	-6.07322	-3.71994	-4.44287	-3.97458	-2.42753	-2.29696	-1.22959	0.674329	3.89965	7.73229	4.69017	1345.44	3.84061	-4.73142	-1.28248	0	-1.81187	-0.240583	0.22166	1.3651	3.09121	6.44812	10.2767	-0.314099	-7.69896	-5.34568	-6.06861	-5.60032	-4.05326	-3.92269	-2.85533	-0.951409	2.27391	6.10655
2.20762e-282	1.088e-279	ENSOARG00000006966	11:14507566-14538339	protein_coding	UNC45B	unc-45 homolog B (C. elegans) [Source:HGNC Symbol;Acc:14304]	-3.24562	-6.07322	-4.64951	-4.53839	-3.97458	-6.07322	-3.78521	-3.5405	0.553627	-2.7026	9.14663	6.05792	1342.8	0.0892532	-2.98918	-0.218469	0	-0.0696285	-3.21602	0.12838	0.296052	4.22556	0.443604	12.5248	-4.74897	-7.57657	-6.15286	-6.04173	-5.47793	-7.57657	-5.28856	-5.04384	-0.949722	-4.20595	7.64328
1.4791e-281	7.09774e-279	ENSOARG00000025193	1:102082961-102083194	protein_coding	PRD-SPRRII-like5	close tp PRD-SPRRII	-5.33311	-6.07322	7.60101	-5.38472	-6.07322	-6.07322	-4.58263	-5.33913	-6.07322	-6.07322	-6.07322	4.81448	1338.98	-0.0508486	-2.14646	12.9501	0	-2.14646	-2.19324	1.9678	-0.0756258	-2.24484	-1.5705	-1.85239	-3.23769	-3.9778	9.69643	-3.2893	-3.9778	-3.9778	-2.48721	-3.24371	-3.9778	-3.9778	-3.9778
6.08982e-277	2.84738e-274	ENSOARG00000018218	3:176752381-176756040	protein_coding			-3.37382	-2.54971	-5.36705	-3.62607	-3.97458	-5.24692	-5.2769	-6.07322	-2.59509	8.77192	-4.7417	5.05938	1317.6	-0.316689	0.138929	-2.42443	0	-1.4009	-1.98187	-2.50252	-4.09121	0.753051	11.4015	-0.359402	-3.98168	-3.15757	-5.97492	-4.23393	-4.58244	-5.85479	-5.88476	-6.68109	-3.20295	8.16406	-5.34956
7.39697e-277	3.3721e-274	ENSOARG00000005829	14:47706543-47708761	protein_coding	LGALS7-like	dog/pig ortho LGALS7	6.98295	4.84726	6.95298	-3.1329	-6.07322	-6.07322	-6.07322	-5.31358	-5.00357	-6.07322	-6.07322	4.98762	1317.21	9.32575	6.92679	9.27917	0	-4.99332	-5.05635	-4.63096	-3.06774	-2.93007	-4.53755	-4.80787	7.81688	5.68119	7.7869	-2.29897	-5.2393	-5.2393	-5.2393	-4.47966	-4.16964	-5.2393	-5.2393
1.2452e-276	5.53809e-274	ENSOARG00000007770	6:83467399-83534455	protein_coding	TMPRSS11D	transmembrane protease, serine 11D [Source:HGNC Symbol;Acc:24059]	-3.33035	7.28424	6.79891	-3.81675	-6.07322	-4.87186	-3.57155	-5.33913	-5.00357	-4.67695	-6.07322	4.35457	1316.16	1.5577	11.0063	10.8495	0	-3.35112	-0.529984	0.747788	-1.34669	-1.32603	0.184878	-3.13534	-5.88838	4.72622	4.24089	-6.37477	-8.63125	-7.42989	-6.12957	-7.89716	-7.56159	-7.23497	-8.63125
3.66944e-276	1.59315e-273	ENSOARG00000020848	3:59855920-59859301	protein_coding	IL36A	interleukin 36, alpha [Source:HGNC Symbol;Acc:15562]	-6.07322	3.78003	7.04531	-5.11256	-6.07322	-6.07322	-4.12619	-6.07322	-6.07322	-4.54485	-6.07322	4.06958	1313.98	-2.60013	7.72063	11.5814	0	-3.13185	-2.99026	1.10296	-2.6173	-2.80886	0.228657	-2.4773	-5.09328	4.75998	8.02525	-4.13262	-5.09328	-5.09328	-3.14624	-5.09328	-5.09328	-3.5649	-5.09328
7.61962e-276	3.23125e-273	ENSOARG00000009464	14:51722265-51728397	protein_coding			-6.07322	-0.834869	-6.07322	-6.07322	-6.07322	-3.68814	-6.07322	-6.07322	-6.07322	8.18578	-6.07322	4.5532	1312.51	-0.0778195	6.11678	-0.0633858	0	-0.102336	2.7374	0.163549	-0.0693691	-0.377475	15.6219	-0.0723083	-6.29355	-1.0552	-6.29355	-6.29355	-6.29355	-3.90847	-6.29355	-6.29355	-6.29355	7.96545	-6.29355
1.30669e-274	5.41533e-272	ENSOARG00000013530	22:6177045-6182234	protein_coding	MBL2	mannose-binding lectin (protein C) 2, soluble [Source:HGNC Symbol;Acc:6922]	-6.07322	-3.42941	-6.07322	-6.07322	-6.07322	-6.07322	-6.07322	-6.07322	-6.07322	8.48259	-6.07322	4.76988	1306.8	-0.00599312	3.37304	-0.00320108	0	-0.150472	-0.122565	0.0342443	-0.0091932	-0.089843	15.5621	0.0228302	-6.62314	-3.97933	-6.62314	-6.62314	-6.62314	-6.62314	-6.62314	-6.62314	-6.62314	7.93268	-6.62314
7.29858e-273	2.95755e-270	ENSOARG00000009335	3:209363795-209403986	protein_coding	GALNT8	UDP-N-acetyl-alpha-D-galactosamine:polypeptide N-acetylgalactosaminyltransferase 8 (GalNAc-T8) [Source:HGNC Symbol;Acc:4130]	7.00072	4.30881	1.06775	-5.33932	-2.63371	-4.87186	-4.71854	-4.61528	-3.01479	-4.08955	-5.04577	4.05108	1298.7	12.3663	9.06116	6.45572	0	2.05111	0.734557	0.801767	0.76185	2.208	1.95178	1.17866	4.45649	1.76457	-1.47649	-7.88356	-5.17795	-7.4161	-7.26277	-7.15952	-5.55903	-6.63379	-7.59001
1.33048e-272	5.2742e-270	ENSOARG00000001920	21:41035870-41059989	protein_coding			-6.07322	-1.05091	-6.07322	-6.07322	-6.07322	-4.44351	-6.07322	-5.31358	-6.07322	8.75303	-6.07322	5.25254	1297.49	-0.0306507	5.42823	-0.0172991	0	-0.571714	3.29162	0.165681	1.74455	-0.376139	16.0211	0.0956815	-6.81652	-1.79421	-6.81652	-6.81652	-6.81652	-5.18681	-6.81652	-6.05688	-6.81652	8.00973	-6.81652
2.18219e-271	8.46644e-269	ENSOARG00000011108	16:38109886-38131379	protein_coding			-4.28813	-2.00718	-6.07322	-5.33932	-3.97458	-4.51444	-4.27236	-4.58974	-3.04737	8.49071	-6.07322	4.77552	1291.86	1.14442	3.45891	-1.90227	0	1.35614	0.255486	1.33863	0.651645	1.76651	14.2667	-1.97542	-4.94623	-2.66528	-6.73132	-5.99742	-4.63268	-5.17253	-4.93046	-5.24783	-3.70547	7.83262	-6.73132
2.63111e-271	9.99547e-269	ENSOARG00000013088	X:99081104-99099072	protein_coding	ATP1B4	ATPase, Na+/K+ transporting, beta 4 polypeptide [Source:HGNC Symbol;Acc:808]	-4.28743	-2.00718	-6.07322	-1.94948	-6.07322	-4.87186	-3.22341	-3.12582	-4.59047	-2.06052	7.77535	4.5985	1291.49	-2.21842	-0.384054	-5.31483	0	-5.40637	-2.42921	-0.3591	-1.36539	-2.24033	-0.059949	9.59417	-5.17729	-2.89705	-6.96309	-2.83934	-6.96309	-5.76173	-4.11327	-4.01569	-5.48033	-2.95039	6.88549
1.16078e-269	4.31976e-267	ENSOARG00000018263	3:176761677-176770592	protein_coding			-6.07322	-0.480817	-5.3689	-6.07322	-3.97458	-6.07322	-6.07322	-5.31358	-5.00357	8.73506	-6.07322	5.05592	1283.86	-0.057089	7.11768	1.58833	0	3.45986	0.208752	0.0344098	1.72422	2.13174	16.1262	-0.145852	-8.40407	-2.81166	-7.69974	-8.40407	-6.30543	-8.40407	-8.40407	-7.64443	-7.33441	6.40421	-8.40407
1.40827e-266	5.13596e-264	ENSOARG00000015292	18:58171387-58178141	protein_coding			-6.07322	0.91541	-6.07322	-6.07322	-6.07322	-1.88297	-4.83073	-5.31358	-6.07322	10.3621	-6.07322	6.75325	1269.57	-0.10141	8.90675	-0.0908764	0	0.923812	5.24294	2.58853	1.67714	-0.219616	18.0491	-0.235517	-6.39976	0.588873	-6.39976	-6.39976	-6.39976	-2.20951	-5.15726	-5.64012	-6.39976	10.0356	-6.39976
3.58144e-266	1.28054e-263	ENSOARG00000008958	24:27290363-27297934	protein_coding	TRIM72	tripartite motif containing 72 [Source:HGNC Symbol;Acc:32671]	-4.57752	-6.07322	-6.07322	-6.07322	-2.63371	-6.07322	-6.07322	-4.33726	-2.18046	-6.07322	6.65641	3.40498	1267.69	2.60914	-0.278508	0.0371044	0	4.09294	-0.12611	-0.0232826	3.06495	4.96931	-0.16072	13.8185	-5.07423	-6.56994	-6.56994	-6.56994	-3.13043	-6.56994	-6.56994	-4.83398	-2.67718	-6.56994	6.15969
3.59773e-265	1.26163e-262	ENSOARG00000006881	17:43058280-43074645	protein_coding	TDO2	tryptophan 2,3-dioxygenase [Source:HGNC Symbol;Acc:11708]	-5.31763	-2.54971	-6.07322	-6.07322	-3.97458	-4.87186	-5.51486	-6.07322	-6.07322	8.24087	-6.07322	4.55304	1263.05	1.84354	3.91951	0.0553412	0	2.37968	2.61052	1.72531	0.0313319	0.00866754	15.0827	0.196562	-5.60569	-2.83777	-6.36129	-6.36129	-4.26264	-5.15993	-5.80292	-6.36129	-6.36129	7.95281	-6.36129
5.60352e-262	1.92793e-259	ENSOARG00000011468	14:53793497-53829584	protein_coding	SULT2A1	sulfotransferase family, cytosolic, 2A, dehydroepiandrosterone (DHEA)-preferring, member 1 [Source:HGNC Symbol;Acc:11458]	-5.03705	-1.61384	-6.07322	-6.07322	6.36147	-6.07322	-6.07322	-5.34937	-6.07322	8.63241	-6.07322	5.17006	1248.26	2.57846	4.60531	0.0534122	0	12.6137	-0.564391	0.0826461	1.76355	-0.198341	15.5644	0.279589	-5.02837	-1.60516	-6.06454	-6.06454	6.37015	-6.06454	-6.06454	-5.34069	-6.06454	8.64109	-6.06454
3.84011e-260	1.29675e-257	ENSOARG00000015464	9:37492107-37500880	protein_coding	CYP7A1	cytochrome P450, family 7, subfamily A, polypeptide 1 [Source:HGNC Symbol;Acc:2651]	-6.07322	0.973849	-6.07322	-5.38472	-6.07322	-4.87186	-6.07322	-6.07322	-6.07322	8.26867	-6.07322	4.84637	1239.75	-1.80856	5.39426	-1.79988	0	-2.64735	0.497678	-1.71947	-1.84036	-2.10953	13.4755	-1.58699	-6.66682	0.380256	-6.66682	-5.97831	-6.66682	-5.46546	-6.66682	-6.66682	-6.66682	7.67507	-6.66682
3.26424e-259	1.08224e-256	ENSOARG00000006551	23:26078308-26118372	protein_coding	DSG1	desmoglein 1 [Source:HGNC Symbol;Acc:3048]	10.3995	9.71915	3.49408	-6.07322	-6.07322	-5.24692	-5.2769	-5.34937	0.295675	-0.727745	-5.04577	7.59969	1235.44	17.5425	16.3788	10.7302	0	-0.41359	1.83049	1.77104	1.75933	7.54752	6.28938	2.92791	8.74831	8.06792	1.84285	-7.72445	-7.72445	-6.89815	-6.92812	-7.0006	-1.35555	-2.37897	-6.69699
1.07594e-258	3.50352e-256	ENSOARG00000012744	22:33013203-33088685	protein_coding	NRAP	nebulin-related anchoring protein [Source:HGNC Symbol;Acc:7988]	-1.14651	-0.834869	-3.10024	-1.40858	-0.422289	1.65993	0.700361	0.148848	-0.662269	-1.77074	10.9548	7.98278	1233.04	0.358459	0.230668	-1.63919	0	0.648057	3.09978	2.23937	1.54987	0.724899	-0.398038	12.4877	-3.52307	-3.21144	-5.47681	-3.78515	-2.79886	-0.716636	-1.67621	-2.22772	-3.03884	-4.14731	8.57822
1.59173e-258	5.09213e-256	ENSOARG00000001533	19:48075237-48091789	protein_coding	ITIH1	inter-alpha-trypsin inhibitor heavy chain 1 [Source:HGNC Symbol;Acc:6166]	-4.57752	1.28208	-5.3689	-2.86248	-3.97458	-6.07322	-5.51486	-4.12643	-3.46707	11.0524	-5.04577	7.35686	1232.25	-1.76841	3.81925	-2.64897	0	-1.61209	-4.39171	-2.72742	-0.916069	-0.668562	13.5834	-1.5019	-6.96956	-1.10997	-7.76094	-5.25453	-6.36662	-8.46527	-7.9069	-6.51847	-5.85911	8.66033	-7.43781
1.95131e-258	6.13485e-256	ENSOARG00000008828	6:84148570-84165137	protein_coding	UGT2B7	Ovis aries UDP glucuronosyltransferase 2 family, polypeptide B7 (UGT2B7), mRNA. [Source:RefSeq mRNA;Acc:NM_001205151]	-5.33311	-2.00718	-5.36705	-5.23916	1.01005	-5.24692	-5.51486	-6.07322	-6.07322	8.58218	-6.07322	4.93022	1231.84	-0.00617978	3.52176	-0.12757	0	6.57739	0.594156	-0.216624	-1.79113	-1.51346	13.7961	-1.84507	-6.92095	-3.59503	-6.9549	-6.827	-0.577797	-6.83477	-7.10271	-7.66107	-7.66107	6.99433	-7.66107
1.13131e-257	3.49652e-255	ENSOARG00000012682	14:54692656-54696351	protein_coding	HRC	histidine rich calcium binding protein [Source:HGNC Symbol;Acc:5178]	-1.02186	-2.54971	-1.29804	-0.744698	-2.2523	-1.64778	-1.44512	-1.28085	-2.43926	-0.656116	9.32169	6.20004	1228.3	-0.479053	-1.73318	-0.802301	0	-1.42361	-1.08089	-0.72254	-0.617434	-1.78281	-0.124792	9.87858	-2.15476	-3.68261	-2.43095	-1.8776	-3.38521	-2.78068	-2.57802	-2.41376	-3.57216	-1.78902	8.18878
2.7799e-257	8.44857e-255	ENSOARG00000008056	6:83627894-83666501	protein_coding	Tmprss11g	transmembrane protease serine 11G-like	-4.28743	6.38942	6.51607	-5.33932	-6.07322	-6.07322	-6.07322	-5.03254	-6.07322	-4.08955	-6.07322	3.87338	1226.49	1.23123	11.2486	11.8745	0	-2.2139	-2.18897	-1.61556	0.715463	-2.15988	2.15742	-1.74359	-4.64808	6.02877	6.15542	-5.69996	-6.43387	-6.43387	-6.43387	-5.39318	-6.43387	-4.45019	-6.43387
8.54503e-257	2.5544e-254	ENSOARG00000006050	2:9355803-9359076	protein_coding			-2.68788	0.0404678	-5.3689	-3.8011	-6.07322	-3.31308	-5.51486	-4.30147	-1.96435	9.64881	-6.07322	6.38107	1224.23	0.720682	3.89227	-2.17434	0	-3.21096	0.435759	-2.5237	-0.821476	2.42848	12.7379	-3.99033	-1.9724	0.755954	-4.65341	-3.08561	-5.35774	-2.59759	-4.79937	-3.58599	-1.24886	10.3643	-5.35774
1.76823e-256	5.15203e-254	Addition08	1:101212427-101216805		FLG		9.68568	-2.54971	-2.16062	-5.38472	-6.07322	-6.07322	-5.51486	-5.03254	-6.07322	-6.07322	-5.03054	7.03526	1222.77	15.2098	2.04725	3.5062	0	-2.41213	-2.21735	-0.044437	0.838559	-1.96176	-1.97315	1.1849	7.55541	-4.67998	-4.29089	-7.51499	-8.20349	-8.20349	-7.64513	-7.16281	-8.20349	-8.20349	-7.16081
1.77997e-256	5.15203e-254	ENSOARG00000005506	11:26055427-26059849	protein_coding	ENO3	enolase 3 (beta, muscle) [Source:HGNC Symbol;Acc:3354]	1.3836	2.27766	2.92667	1.7861	2.17015	1.18608	2.00616	1.90366	1.74847	2.09379	11.8713	8.82068	1222.75	-0.414671	0.504065	1.12694	0	0.396378	-0.693657	0.349964	0.141597	-0.125255	0.372104	10.0985	0.997341	1.89141	2.54041	1.39984	1.78389	0.799821	1.61991	1.5174	1.36221	1.70754	11.4851
3.55528e-256	1.01298e-253	ENSOARG00000019925	1:183626779-183669566	protein_coding	HGD	homogentisate 1,2-dioxygenase [Source:HGNC Symbol;Acc:4892]	-5.3236	-0.834869	-5.3689	-5.23916	-1.95094	-5.24692	-4.01774	-6.07322	-4.59047	9.04259	-4.09311	5.37281	1221.36	0.0102181	3.7783	-0.130082	0	2.63944	-0.161059	1.87744	-1.84009	0.949135	14.2218	2.98526	-5.74368	-1.25495	-5.78898	-5.65923	-2.37102	-5.667	-4.43781	-6.4933	-5.01055	8.62251	-4.51319
6.07749e-256	1.70497e-253	ENSOARG00000004669	8:82967383-83002611	protein_coding	SLC22A1	solute carrier family 22 (organic cation transporter), member 1 [Source:HGNC Symbol;Acc:10963]	-4.26517	-0.331807	-6.07322	-4.65081	-3.97458	-4.44351	-6.07322	-5.31358	-4.59047	8.7338	-3.18616	5.46879	1220.28	2.01012	2.91999	-2.57121	0	-0.88832	0.312039	-2.43779	-0.764227	-0.070314	13.3288	2.42243	-4.95581	-1.02245	-6.76386	-5.34145	-4.66522	-5.13415	-6.76386	-6.00422	-5.28111	8.04316	-3.8768
1.20955e-255	3.34184e-253	ENSOARG00000015661	11:61501601-61513913	protein_coding	APOH	apolipoprotein H (beta-2-glycoprotein I) [Source:HGNC Symbol;Acc:616]	-5.3236	1.41457	-6.07322	-6.07322	-6.07322	-5.24692	-4.71854	-5.03254	-5.00357	11.2146	-6.07322	7.52195	1218.9	1.73	8.45924	-0.0436915	0	-0.0245219	1.95602	2.59943	2.4722	1.95375	18.5091	-0.0578002	-5.37741	1.36076	-6.12703	-6.12703	-6.12703	-5.30073	-4.77234	-5.08634	-5.05737	11.1608	-6.12703
6.03199e-255	1.64169e-252	ENSOARG00000002515	15:26974130-26975908	protein_coding	APOC3	apolipoprotein C-III [Source:HGNC Symbol;Acc:610]	-6.07322	-0.834869	-6.07322	-6.07322	5.83572	-6.07322	-6.07322	-6.07322	-6.07322	8.40969	-6.07322	4.8659	1215.66	-0.0143011	5.87238	-0.0074174	0	12.562	-0.284821	0.0850695	-0.0221772	-0.210298	15.5273	0.0570716	-4.47376	0.764593	-4.47376	-4.47376	7.43518	-4.47376	-4.47376	-4.47376	-4.47376	10.0091	-4.47376
1.10798e-254	2.97119e-252	ENSOARG00000004726	8:83234080-83281935	protein_coding	PLG	Plasminogen [Source:UniProtKB/Swiss-Prot;Acc:P81286]	-5.3236	1.57418	-5.3689	-6.07322	-3.97458	-6.07322	-6.07322	-6.07322	-4.59047	11.1015	-6.07322	7.40073	1214.44	1.7486	8.62929	1.61019	0	2.90504	-0.098196	0.0728338	-0.0338867	2.8536	18.3315	-0.0430026	-6.61697	0.280813	-6.66227	-7.36659	-5.26795	-7.36659	-7.36659	-7.36659	-5.88384	9.80817	-7.36659
1.26894e-254	3.3535e-252	ENSOARG00000016799	24:1494721-1500879	protein_coding	RPL3L	ribosomal protein L3-like [Source:HGNC Symbol;Acc:10351]	-1.55289	-3.42941	-1.06733	-1.12873	-1.14024	-1.68858	-1.66282	-1.58915	-0.820594	-1.49323	7.45058	4.29857	1214.16	-0.345774	-2.68588	0.222829	0	-0.300224	-0.970139	-0.426044	-0.552437	-0.027949	-0.0720295	8.5119	-1.79045	-3.66697	-1.30489	-1.3663	-1.3778	-1.92614	-1.90039	-1.82672	-1.05816	-1.73079	7.21302
1.86063e-254	4.84693e-252	ENSOARG00000013478	8:52785853-52794276	protein_coding			6.21419	-6.07322	-6.07322	-6.07322	-6.07322	-6.07322	-5.51486	-6.07322	-6.07322	-6.07322	-6.07322	4.64066	1213.39	14.713	5.40099	-0.0272605	0	5.40099	1.69977	1.54057	0.024816	0.624354	0.135121	-0.267107	5.56802	-6.71939	-6.71939	-6.71939	-6.71939	-6.71939	-6.16102	-6.71939	-6.71939	-6.71939	-6.71939
3.71344e-254	9.53727e-252	ENSOARG00000015144	18:58104179-58132485	protein_coding	SERPINA5	serpin peptidase inhibitor, clade A (alpha-1 antiproteinase, antitrypsin), member 5 [Source:HGNC Symbol;Acc:8723]	-6.07322	-1.30509	-4.66273	-2.84865	-3.15367	-4.87186	-6.07322	-2.74031	-3.32296	9.27836	-5.03054	5.57736	1212	-5.26835	-0.364066	-2.823	0	-2.28456	-2.89601	-5.30803	-0.65423	-0.0307335	10.8013	-2.18792	-6.89207	-2.12394	-5.48158	-3.6675	-3.97252	-5.69071	-6.89207	-3.55916	-4.14181	8.45951	-5.84939
8.36925e-254	2.11963e-251	ENSOARG00000015253	18:58153897-58159465	protein_coding			-5.33311	1.03001	-6.07322	-5.06132	-6.07322	-3.68814	-6.07322	-6.07322	-6.07322	10.9792	-6.07322	7.32038	1210.37	-0.786163	5.66128	-2.5783	0	-2.4367	0.6239	-2.67815	-2.57192	-2.37057	15.3879	-2.59729	-5.30984	1.05328	-6.04995	-5.03805	-6.04995	-3.66487	-6.04995	-6.04995	-6.04995	11.0025	-6.04995
9.36595e-254	2.33956e-251	ENSOARG00000014129	6:88198267-88224250	protein_coding	AFM	afamin [Source:HGNC Symbol;Acc:316]	-4.30474	0.244138	-6.07322	-4.26175	-6.07322	-6.07322	-5.12906	-4.30147	-5.00357	9.00448	-5.03054	5.37712	1210.14	-0.0242684	4.46396	-3.1228	0	-2.84433	-3.08007	-1.21844	-0.0417796	-1.08977	13.3888	-0.385329	-6.84873	-2.29985	-8.61721	-6.80574	-8.61721	-8.61721	-7.67305	-6.84546	-7.54756	6.46049	-7.57453
6.40663e-252	1.57871e-249	ENSOARG00000004059	11:42419764-42428625	protein_coding	G6PC	glucose-6-phosphatase, catalytic subunit [Source:HGNC Symbol;Acc:4056]	-4.73243	-1.30509	-6.07322	-6.07322	0.514873	-4.87186	-6.07322	-5.34937	-6.07322	8.14738	-5.04577	4.59566	1201.63	3.43618	4.78114	0.078735	0	6.6203	2.28278	0.0772287	1.77936	-0.183737	15.0148	3.20085	-4.83543	-1.40808	-6.17622	-6.17622	0.411879	-4.97486	-6.17622	-5.45237	-6.17622	8.04439	-5.14876
2.0507e-250	4.98593e-248	ENSOARG00000006670	21:43889040-43900655	protein_coding			0.602645	-0.647009	0.650322	1.36387	0.18436	-0.168951	0.614405	0.337438	-0.250269	-0.908293	11.5641	8.4549	1194.65	-0.680327	-1.95826	-0.73368	0	-1.11948	-1.18165	-0.622261	-0.990607	-1.37809	-2.5442	10.2433	-0.827105	-2.07676	-0.779428	-0.0658756	-1.24539	-1.5987	-0.815345	-1.09231	-1.68002	-2.33804	10.1344
2.37179e-250	5.69073e-248	ENSOARG00000016946	3:133651634-133659310	protein_coding	KRT74	keratin 74 [Source:HGNC Symbol;Acc:28929]	5.64338	6.27787	-3.62948	-6.07322	-6.07322	-4.51444	-6.07322	-6.07322	-6.07322	-6.07322	-5.03054	4.25958	1194.36	13.9766	13.0713	4.01907	0	-0.27967	1.64629	0.401919	-0.149145	-0.743611	0.853372	2.65427	4.94472	5.57921	-4.32814	-6.77189	-6.77189	-5.2131	-6.77189	-6.77189	-6.77189	-6.77189	-5.7292
8.77175e-250	2.07731e-247	ENSOARG00000020765	1:214514907-214548769	protein_coding	SLC2A2	Glucose transporter 2 [Source:UniProtKB/TrEMBL;Acc:Q8WMN0]	-5.31763	-3.42941	-6.07322	-5.23916	3.12809	-6.07322	-6.07322	-6.07322	-6.07322	8.03542	-6.07322	4.55593	1191.73	-0.0663205	1.2648	-1.84712	0	7.94137	-2.25081	-1.60462	-1.86809	-2.24169	13.6571	-1.77628	-5.98393	-4.09571	-6.73952	-5.90546	2.46178	-6.73952	-6.73952	-6.73952	-6.73952	7.36911	-6.73952
7.24683e-249	1.69418e-246	ENSOARG00000021093	1:101181173-101280873	protein_coding	FLG2	filaggrin family member 2 [Source:HGNC Symbol;Acc:33276]	12.5998	-2.54971	-2.22236	-5.11256	-3.97458	-6.07322	-5.51486	-5.31358	-6.07322	-4.54485	-2.69475	9.58994	1187.48	17.4387	2.39241	2.8087	0	0.852585	-1.96195	-0.962605	-0.512888	-1.83662	0.315963	3.42576	9.48323	-5.66624	-5.33889	-8.22909	-7.09111	-9.18975	-8.63139	-8.43012	-9.18975	-7.66138	-5.81128
8.28688e-248	1.9128e-245	ENSOARG00000013662	13:11833205-11865867	protein_coding	ITIH2	inter-alpha-trypsin inhibitor heavy chain 2 [Source:HGNC Symbol;Acc:6167]	-4.56801	2.02476	-4.24827	-2.84218	-2.63371	-2.95331	-3.23644	-1.99235	-4.59047	11.1627	-6.07322	7.461	1182.57	-2.19782	5.15816	-1.58071	0	0.434263	-0.664751	-0.668881	0.472539	-1.79019	14.1626	-4.92321	-6.15873	0.434035	-5.83899	-4.4329	-4.22443	-4.54403	-4.82716	-3.58307	-6.18119	9.572	-7.66394
5.72447e-247	1.30482e-244	ENSOARG00000013022	3:98927197-98974919	protein_coding	TMEM182	transmembrane protein 182 [Source:HGNC Symbol;Acc:26391]	-2.02005	-2.54971	-6.07322	-2.8956	-3.97458	-2.73899	-0.59656	-1.19138	-2.13886	-6.07322	7.16544	4.03816	1178.68	0.840036	0.168414	-4.21753	0	-1.37141	0.0728604	2.42219	1.81689	0.577814	-4.15529	10.0795	-1.48472	-2.01438	-5.53789	-2.36027	-3.43925	-2.20365	-0.0612284	-0.656045	-1.60353	-5.53789	7.70077
1.16861e-246	2.63082e-244	ENSOARG00000018001	12:77818739-77842494	protein_coding	IGFN1	immunoglobulin-like and fibronectin type III domain containing 1 [Source:HGNC Symbol;Acc:24607]	-6.07322	-6.07322	-5.09463	-4.50525	-2.63371	-6.07322	-4.52283	-5.06111	-3.00424	-4.54485	8.58766	5.49111	1177.24	-2.61409	-2.33666	-0.219735	0	2.03479	-2.45354	1.87402	-0.0619057	1.63362	0.426408	13.1615	-8.84215	-8.84215	-7.86356	-7.27418	-5.40263	-8.84215	-7.29176	-7.83004	-5.77317	-7.31377	5.81873
1.91496e-246	4.25846e-244	ENSOARG00000020523	1:198738953-198747031	protein_coding	HRG	histidine-rich glycoprotein [Source:HGNC Symbol;Acc:5181]	-5.31763	2.34563	-0.174762	-4.22725	-6.07322	-4.44351	-4.18201	-2.61662	-5.00357	11.5698	-6.07322	7.98598	1176.25	-1.28065	5.776	3.97704	0	-3.64074	0.245153	0.413796	1.43033	-1.17855	15.6539	-2.91945	-5.96195	1.70131	-0.819079	-4.87157	-6.71754	-5.08783	-4.82632	-3.26094	-5.64789	10.9255	-6.71754
1.03303e-245	2.26955e-243	ENSOARG00000000773	4:87905164-87944629	protein_coding	ASB15	ankyrin repeat and SOCS box containing 15 [Source:HGNC Symbol;Acc:19767]	-5.3236	-6.07322	-6.07322	-4.22725	-3.97458	-6.07322	-5.26342	-6.07322	-2.78635	-6.07322	6.41316	3.30888	1172.85	-1.33029	-3.32489	-3.10475	0	-0.405332	-3.38344	-0.366737	-3.11744	0.791457	-2.78338	10.488	-6.18834	-6.93795	-6.93795	-5.09198	-4.83931	-6.93795	-6.12815	-6.93795	-3.65108	-6.93795	5.54843
1.10269e-245	2.39375e-243	ENSOARG00000009286	JH924455.1:20430-36230	protein_coding			-5.31763	0.581361	-5.40042	-6.07322	-6.07322	-4.87186	-6.07322	-5.03254	-6.07322	11.1379	-6.07322	7.48037	1172.72	1.82086	7.9237	1.64072	0	0.276291	3.07539	-0.032928	2.55706	0.0939097	18.2785	-0.0491895	-6.95732	-1.05833	-7.04012	-7.71292	-7.71292	-6.51156	-7.71292	-6.67223	-7.71292	9.49818	-7.71292
1.91512e-245	4.1085e-243	ENSOARG00000020529	7:34747153-34805210	protein_coding	CAPN3	Ovis aries calpain 3, (p94) (CAPN3), mRNA. [Source:RefSeq mRNA;Acc:NM_001009212]	-0.471422	0.504154	0.370016	1.51536	2.45309	2.08594	2.42929	1.24331	1.72922	2.21718	9.97328	6.87603	1171.61	-1.79248	-1.32197	-1.17444	0	0.632578	0.295405	0.881318	-0.274754	-0.0191002	0.775331	8.4505	-3.06788	-2.0923	-2.22644	-1.0811	-0.143367	-0.510522	-0.167171	-1.35315	-0.867234	-0.37928	7.37682
3.45697e-245	7.32997e-243	ENSOARG00000004055	11:13874542-13875798	protein_coding			-6.07322	-1.61384	-5.3689	-6.07322	-6.07322	-6.07322	-6.07322	-6.07322	-2.12019	8.05002	-5.03054	4.35485	1170.42	-0.00642788	5.05244	1.66312	0	-0.373769	-0.290544	0.0758145	-0.0163482	4.96302	15.1348	2.88534	-4.24699	0.212392	-3.54267	-4.24699	-4.24699	-4.24699	-4.24699	-4.24699	-0.293954	9.87625	-3.2043
2.66142e-244	5.57829e-242	ENSOARG00000003346	18:32831356-32839372	protein_coding	CYP1A2	cytochrome P450, family 1, subfamily A, polypeptide 2 [Source:HGNC Symbol;Acc:2596]	-6.07322	-6.07322	-6.07322	-6.07322	-2.63371	-6.07322	-5.51486	-6.07322	-6.07322	7.83052	-4.73684	4.20456	1166.31	0.0399769	-0.660021	0.0433925	0	3.71142	-0.439537	1.78934	0.0124755	-0.13584	14.7517	3.03052	-7.05799	-7.05799	-7.05799	-7.05799	-3.61848	-7.05799	-6.49963	-7.05799	-7.05799	6.84575	-5.72161
3.93031e-244	8.14423e-242	ENSOARG00000019245	3:34240617-34261762	protein_coding	TRIM54	tripartite motif containing 54 [Source:HGNC Symbol;Acc:16008]	-5.33311	-6.07322	-5.36705	-6.07322	-6.07322	-6.07322	-6.07322	-4.57949	-6.07322	-6.07322	6.46744	3.2657	1165.52	1.78226	-0.0713366	1.62541	0	-0.0713366	-0.146575	0.0909718	2.52177	-0.227948	0.178597	13.5413	-5.34461	-6.08472	-5.37855	-6.08472	-6.08472	-6.08472	-6.08472	-4.59099	-6.08472	-6.08472	6.45594
2.81372e-243	5.76496e-241	ENSOARG00000020526	1:198759112-198773802	protein_coding	FETUB	fetuin B [Source:HGNC Symbol;Acc:3658]	-6.07322	-0.331807	-1.76208	-3.5841	0.464782	-6.07322	-5.51486	-6.07322	-6.07322	8.99492	-6.07322	5.35023	1161.56	-4.03745	2.9176	1.29478	0	3.71996	-3.958	-2.24236	-4.02749	-4.1106	12.2965	-4.07557	-6.29231	-0.550898	-1.98117	-3.80319	0.245691	-6.29231	-5.73395	-6.29231	-6.29231	8.77583	-6.29231
1.04266e-242	2.11254e-240	ENSOARG00000015216	9:36308546-36324915	protein_coding			6.38667	-6.07322	-6.07322	-6.07322	-6.07322	-6.07322	-6.07322	-6.07322	-6.07322	-2.83656	-6.07322	3.79371	1158.92	14.0351	-1.14441	0.069178	0	-1.14441	-0.836001	0.167748	0.00297712	-0.37486	5.82711	0.426757	6.15401	-6.30588	-6.30588	-6.30588	-6.30588	-6.30588	-6.30588	-6.30588	-6.30588	-3.06922	-6.30588
7.16339e-242	1.43543e-239	ENSOARG00000009231	JH924455.1:1095-3873	protein_coding			-6.07322	1.08407	-5.36705	-5.33932	-6.07322	-4.62635	-6.07322	-6.07322	-6.07322	11.1138	-6.07322	7.47948	1155.04	-1.72274	6.1814	-0.0721341	0	-1.97084	1.66629	-1.91949	-1.73997	-1.43419	16.1378	-1.6788	-5.36483	1.79247	-4.65866	-4.63092	-5.36483	-3.91795	-5.36483	-5.36483	-5.36483	11.8222	-5.36483
5.16668e-241	1.02407e-238	ENSOARG00000018312	15:46013968-46023453	protein_coding	HPX	hemopexin [Source:HGNC Symbol;Acc:5171]	-6.07322	2.23051	-6.07322	-6.07322	-6.07322	-5.24692	-6.07322	-4.85632	-6.07322	11.5649	-6.07322	7.86378	1151.06	-0.113744	9.78578	-0.0977788	0	0.484339	2.12982	0.152622	2.85438	-0.36733	19.2192	-0.206253	-6.54102	1.7627	-6.54102	-6.54102	-6.54102	-5.71472	-6.54102	-5.32413	-6.54102	11.0971	-6.54102
3.47527e-240	6.81415e-238	ENSOARG00000000815	1:123653763-123654257	protein_coding	KRTAP13-1-like1/LOC101106046	LOC101106046/keratin-associated protein 13-1-like	5.41897	-6.07322	-6.07322	-6.07322	-6.07322	-5.24692	-6.07322	-6.07322	-6.07322	-6.07322	-4.73684	4.04782	1147.22	13.9364	-0.541058	-0.104464	0	-0.541058	1.46558	0.395049	-0.132171	-0.731522	0.612203	2.83208	6.43347	-5.05872	-5.05872	-5.05872	-5.05872	-4.23242	-5.05872	-5.05872	-5.05872	-5.05872	-3.72234
3.94081e-240	7.64476e-238	ENSOARG00000018004	11:19477770-19480839	protein_coding	VTN	vitronectin [Source:HGNC Symbol;Acc:12724]	-6.07322	1.75168	-6.07322	-5.23916	2.02214	-4.62635	-6.07322	-5.34937	-3.75597	11.1373	-6.07322	7.52878	1146.97	-1.83455	6.13626	-1.83003	0	6.40727	1.00099	-1.82469	-0.130153	2.49385	16.1424	-1.61422	-6.58722	1.23769	-6.58722	-5.75315	1.50815	-5.14034	-6.58722	-5.86337	-4.26996	10.6233	-6.58722
4.76845e-239	9.15291e-237	ENSOARG00000011575	11:39610875-39611610	protein_coding	TCAP	titin-cap [Source:HGNC Symbol;Acc:11610]	1.7003	1.61147	0.85727	1.76826	0.41289	0.75849	1.40664	0.767298	1.22185	-0.429853	11.1636	8.09537	1141.95	-0.203648	-0.351905	-1.0694	0	-1.55505	-1.20088	-0.466484	-1.1817	-0.692174	-2.26571	9.25475	2.6888	2.59998	1.84577	2.75676	1.40139	1.74699	2.39514	1.7558	2.21035	0.558652	12.1521
2.21927e-238	4.21546e-236	ENSOARG00000015870	3:171673799-171759140	protein_coding	PAH	phenylalanine hydroxylase [Source:HGNC Symbol;Acc:8582]	-3.98282	2.15675	-6.07322	-2.61123	-3.97458	-2.1606	-5.51486	-5.03254	-5.00357	10.4187	-6.07322	6.94646	1138.85	-1.8415	3.05414	-5.50422	0	-3.25387	-1.20646	-3.46062	-2.95878	-3.80021	12.4685	-5.36661	-4.42217	1.71739	-6.51258	-3.05059	-4.41394	-2.59996	-5.95422	-5.4719	-5.44293	9.9793	-6.51258
7.93342e-238	1.4914e-235	ENSOARG00000019162	1:6767995-6787884	protein_coding	SPP2	Ovis aries secreted phosphoprotein 2, 24kDa (SPP2), mRNA. [Source:RefSeq mRNA;Acc:NM_001009453]	-6.07322	-2.00718	-6.07322	-4.50269	-1.14024	-6.07322	-6.07322	-6.07322	-6.07322	8.36132	-6.07322	4.65735	1136.29	-3.99534	0.178324	-3.99393	0	1.06518	-4.56073	-4.02999	-4.03255	-4.14674	11.1515	-3.77339	-6.03373	-1.96769	-6.03373	-4.4632	-1.10075	-6.03373	-6.03373	-6.03373	-6.03373	8.40081	-6.03373
2.86396e-237	5.32902e-235	Addition07	1:101124333-101186625		HRNR		10.2134	-1.61384	-2.11483	-2.1407	-3.97458	-2.73899	-2.69055	-3.01332	-1.77447	-1.97377	-2.04316	7.4191	1133.7	12.5537	0.298859	-0.000482605	0	-2.2078	-0.764279	-0.34728	-0.473309	0.310734	0.196358	0.234056	4.25242	-7.57482	-8.0758	-8.10168	-9.93556	-8.69996	-8.65153	-8.97429	-7.73544	-7.93475	-8.00414
8.92861e-237	1.64458e-234	ENSOARG00000006732	23:26264806-26297753	protein_coding	DSC1	desmocollin 1 [Source:HGNC Symbol;Acc:3035]	9.18536	0.724387	1.36545	-2.44175	-2.2523	-1.44383	-4.15498	-3.50297	-4.53012	-0.274069	-6.07322	6.10702	1131.41	10.6086	1.71239	2.77446	0	-1.30977	-0.147198	-2.22725	-1.27268	-2.91982	1.39166	-5.66218	7.73593	-0.725042	-0.0839785	-3.89118	-3.70173	-2.89326	-5.60441	-4.9524	-5.97955	-1.7235	-7.52265
1.91526e-236	3.49248e-234	ENSOARG00000015145	3:116604900-116606136	protein_coding	MYF6	Ovis aries myogenic factor 6 (herculin) (MYF6), mRNA. [Source:RefSeq mRNA;Acc:NM_001134782]	-4.01818	-6.07322	-5.36705	-6.07322	-6.07322	-5.24692	-3.81877	-6.07322	-4.32945	-3.75959	7.3876	4.176	1129.87	3.48597	0.0320373	1.71588	0	0.0320373	2.25557	4.32167	0.0499371	3.80704	4.49264	14.6816	-3.56218	-5.61721	-4.91105	-5.61721	-5.61721	-4.79091	-3.36276	-5.61721	-3.87344	-3.30358	7.84361
3.21083e-236	5.79698e-234	ENSOARG00000002022	JH922779.1:8956-42518	protein_coding			-3.09253	0.145894	-4.38847	-3.11598	0.303145	-2.51408	-4.87956	-3.30086	-2.44406	8.93471	-3.38914	5.35967	1128.83	-0.254921	2.67398	-1.36128	0	2.83224	0.246141	-0.528639	-0.531034	0.224815	11.8718	0.0522008	-5.40229	-2.16386	-6.69822	-5.42573	-2.00661	-4.82383	-7.18932	-5.61062	-4.75382	6.62495	-5.6989
4.23531e-236	7.57166e-234	Addition23	1:101624698-101626287		LCE1-like6		6.37521	-1.61384	-6.07322	-6.07322	-6.07322	-6.07322	-6.07322	-6.07322	-6.07322	-6.07322	-6.07322	3.3961	1128.27	13.5653	5.88425	0.0322156	0	0.458038	0.441287	-0.127411	0.0477147	0.422394	-0.140326	-0.0260389	5.70709	-2.28196	-6.74134	-6.74134	-6.74134	-6.74134	-6.74134	-6.74134	-6.74134	-6.74134	-6.74134
4.80387e-236	8.50471e-234	ENSOARG00000014548	5:12291318-12320770	protein_coding			-1.24502	0.581361	-3.27381	-1.95696	-0.992966	-0.596814	-1.2202	-1.40154	-0.699766	9.9283	-5.04577	6.27414	1128.02	0.495375	2.3899	-1.60814	0	0.801264	1.30509	0.499971	0.376012	1.224	11.6331	-2.62178	-3.57672	-1.75034	-5.60551	-4.28866	-3.32467	-2.92852	-3.55191	-3.73325	-3.03147	7.5966	-7.37747
4.89303e-236	8.57927e-234	ENSOARG00000012835	6:86619919-86657661	protein_coding	GC	group-specific component (vitamin D binding protein) [Source:HGNC Symbol;Acc:4187]	-6.07322	2.69739	-6.07322	-4.19778	-2.2523	-6.07322	-6.07322	-6.07322	-6.07322	11.9932	-6.07322	8.29239	1127.98	-3.33131	5.92966	-3.33544	0	0.929654	-3.60806	-3.42848	-3.35426	-3.2929	15.4211	-3.22061	-6.66586	2.10475	-6.66586	-4.79042	-2.84494	-6.66586	-6.66586	-6.66586	-6.66586	11.4005	-6.66586
1.63457e-235	2.83871e-233	ENSOARG00000004238	1:234845590-234870593	protein_coding	GPR87	G protein-coupled receptor 87 [Source:HGNC Symbol;Acc:4538]	5.73558	5.29687	5.27787	-4.88629	-6.07322	-6.07322	-6.07322	-6.07322	-4.53012	-6.07322	-6.07322	3.69231	1125.55	9.77956	9.02388	9.32217	0	-3.34594	-3.34256	-2.92017	-3.08578	-0.305951	-2.90459	-3.02753	5.34162	4.9029	4.88391	-5.28025	-6.46719	-6.46719	-6.46719	-6.46719	-4.92409	-6.46719	-6.46719
6.06436e-235	1.04324e-232	ENSOARG00000009432	24:27474854-27475391	protein_coding	COX6A2	cytochrome c oxidase subunit VIa polypeptide 2 [Source:HGNC Symbol;Acc:2279]	-6.07322	-6.07322	-6.07322	-3.95227	-6.07322	-6.07322	-4.87956	-4.29845	-1.82939	-4.08955	8.32503	5.26597	1122.91	-3.76467	-3.44708	-3.75398	0	-3.44708	-3.70664	0.00192029	-0.72025	1.60901	0.488817	11.8511	-4.30711	-4.30711	-4.30711	-2.18616	-4.30711	-4.30711	-3.11345	-2.53234	-0.0632769	-2.32344	10.0911
3.42732e-234	5.84086e-232	ENSOARG00000020946	1:99979648-99982903	protein_coding	TMOD4	tropomodulin 4 (muscle) [Source:HGNC Symbol;Acc:11874]	1.90142	1.61147	1.3987	1.70438	1.8572	1.81785	1.74053	1.94275	2.11687	1.93016	10.2607	7.17219	1119.42	0.274861	0.0125442	-0.261437	0	0.258818	0.0369398	0.0486608	0.442477	0.342987	0.372146	8.56835	1.85178	1.56184	1.34907	1.65474	1.80757	1.76822	1.69089	1.89312	2.06724	1.88053	10.2111
1.77249e-233	2.99272e-231	ENSOARG00000004486	11:40766480-40766776	protein_coding	BIIIB4	Ovis aries high-sulfur keratin BIIIB4 protein (BIIIB4), mRNA. [Source:RefSeq mRNA;Acc:NM_001009475]	5.59174	-3.42941	-6.07322	-6.07322	-6.07322	-6.07322	-6.07322	-6.07322	-6.07322	-6.07322	-6.07322	3.64472	1116.11	13.5837	2.80301	-0.0739646	0	-0.720499	-0.707177	0.365929	-0.110529	-0.691794	0.393591	0.0438104	7.3432	-1.67795	-4.32176	-4.32176	-4.32176	-4.32176	-4.32176	-4.32176	-4.32176	-4.32176	-4.32176
8.24527e-233	1.37938e-230	ENSOARG00000002008	JH922980.1:2558-4443	protein_coding			-6.07322	-6.07322	-6.07322	-6.07322	-6.07322	-6.07322	-6.07322	-6.07322	-4.59047	7.73412	-6.07322	4.0892	1113.02	0.0981935	0.180315	0.0804253	0	0.180315	0.380956	-0.178406	0.0881513	3.63454	14.5856	0.0754156	-5.66203	-5.66203	-5.66203	-5.66203	-5.66203	-5.66203	-5.66203	-5.66203	-4.17927	8.14532	-5.66203
1.17382e-232	1.94587e-230	ENSOARG00000014258	12:74054568-74071976	protein_coding	F13B	coagulation factor XIII, B polypeptide [Source:HGNC Symbol;Acc:3534]	-5.31763	-2.00718	-6.07322	-4.88629	2.46588	-6.07322	-6.07322	-6.07322	-4.94983	8.12933	-6.07322	4.43934	1112.31	-1.22152	1.50066	-3.00258	0	6.01551	-3.37217	-2.95889	-3.02455	-0.948484	12.1182	-2.88927	-6.30749	-2.99705	-7.06309	-5.87615	1.47601	-7.06309	-7.06309	-7.06309	-5.93969	7.13947	-7.06309
1.87817e-229	3.08545e-227	ENSOARG00000014087	11:47563592-47595132	protein_coding	SCN4A	sodium channel, voltage-gated, type IV, alpha subunit [Source:HGNC Symbol;Acc:10591]	-1.65655	-3.42941	-1.98168	-0.0411894	0.823898	0.196382	-0.255589	-0.568017	1.61588	0.0274697	8.33189	5.2122	1097.44	-1.02756	-3.97998	-1.74061	0	0.38756	0.203865	-0.15474	-0.52006	1.73255	-0.0962066	8.39601	-4.19484	-5.9677	-4.51997	-2.57948	-1.71439	-2.34191	-2.79388	-3.10631	-0.922412	-2.51082	5.7936
2.48826e-229	4.05121e-227	ENSOARG00000007808	4:65554351-65558327	protein_coding			-6.07322	-1.30509	-4.69425	-6.07322	-6.07322	-6.07322	-6.07322	-6.07322	-6.07322	7.45761	-6.07322	3.98021	1096.88	0.0327872	4.92277	2.45692	0	-0.818642	-0.583993	0.108606	-0.000174846	-0.256629	14.4698	0.258518	-5.73679	-0.968661	-4.35783	-5.73679	-5.73679	-5.73679	-5.73679	-5.73679	-5.73679	7.79404	-5.73679
4.35756e-229	7.03187e-227	ENSOARG00000018816	13:66798218-66835015	protein_coding	LBP	lipopolysaccharide binding protein [Source:HGNC Symbol;Acc:6517]	-4.86102	-1.30509	3.88763	-5.33932	-3.15367	-5.24692	-5.2769	-6.07322	-6.07322	8.29889	-6.07322	4.73957	1095.75	1.26706	3.81955	9.18363	0	1.89906	0.176352	0.00727174	-1.80795	-1.91646	13.7429	-1.78376	-5.55968	-2.00375	3.18897	-6.03798	-3.85233	-5.94559	-5.97556	-6.77189	-6.77189	7.60023	-6.77189
8.32917e-229	1.3323e-226	ENSOARG00000000053	13:50003573-50063325	protein_coding	HAO1	hydroxyacid oxidase (glycolate oxidase) 1 [Source:HGNC Symbol;Acc:4809]	-5.31763	-2.54971	-6.07322	-6.07322	1.01005	-6.07322	-5.51486	-6.07322	-6.07322	7.56573	-6.07322	4.0953	1094.44	1.80351	3.65543	0.034896	0	7.27399	-0.581379	1.86606	-0.00508469	-0.274228	14.6051	0.244538	-6.11672	-3.3488	-6.87231	-6.87231	0.210961	-6.87231	-6.31395	-6.87231	-6.87231	6.76664	-6.87231
5.09668e-228	8.08156e-226	ENSOARG00000007315	12:49567643-49571104	protein_coding	C1orf170	chromosome 1 open reading frame 170 [Source:HGNC Symbol;Acc:28208]	1.25248	0.581361	-1.44368	-0.379235	-3.97458	-3.68814	-1.58963	-1.45304	-0.616249	-4.67695	8.46797	5.35699	1090.79	1.36215	0.331875	-0.942024	0	-4.39598	-4.27692	-1.40567	-1.27914	-0.745235	-3.91793	8.58073	-0.17513	-0.846245	-2.87128	-1.80684	-5.40219	-5.11574	-3.01724	-2.88064	-2.04386	-6.10456	7.04037
2.30589e-227	3.62482e-225	ENSOARG00000007082	3:162088319-162093196	protein_coding	STAC3	SH3 and cysteine rich domain 3 [Source:HGNC Symbol;Acc:28423]	1.32794	-0.834869	0.3129	0.854289	1.32283	-0.245815	-0.0611913	1.09154	0.759269	1.36872	8.00302	4.90182	1087.75	0.450355	-1.71035	-0.592975	0	0.462302	-1.07899	-0.839361	0.314938	-0.0504505	0.497564	7.11152	1.20494	-0.957873	0.189896	0.731285	1.19983	-0.368819	-0.184195	0.968538	0.636265	1.24572	7.88002
6.18231e-227	9.63542e-225	ENSOARG00000006996	19:52560400-52569198	protein_coding	MYL3	myosin, light chain 3, alkali; ventricular, skeletal, slow [Source:HGNC Symbol;Acc:7584]	-1.45508	-6.07322	-4.38847	-2.49318	-3.15367	-2.85588	-3.89552	-2.39647	0.345171	-1.77592	7.5634	4.64358	1085.76	1.46203	-4.9308	-1.72252	0	-1.10988	-0.955377	-0.501704	0.311359	2.49303	1.05631	10.1721	-3.35387	-7.97201	-6.28725	-4.39197	-5.05246	-4.75467	-5.79431	-4.29526	-1.55362	-3.67471	5.66461
1.18261e-226	1.82754e-224	ENSOARG00000021082	1:100983293-100986597	protein_coding	TCHHL1	trichohyalin-like 1 [Source:HGNC Symbol;Acc:31796]	5.38334	-2.54971	-6.07322	-6.07322	-6.07322	-6.07322	-6.07322	-6.07322	-3.04737	-4.54485	-5.04577	3.81794	1084.46	13.6169	3.99587	-0.111031	0	-0.463513	-0.592064	0.390004	-0.13514	3.21111	3.57642	2.86714	4.00095	-3.9321	-7.45561	-7.45561	-7.45561	-7.45561	-7.45561	-7.45561	-4.42976	-5.92724	-6.42816
2.32096e-225	3.55652e-223	ENSOARG00000009393	2:245388619-245398914	protein_coding	PLA2G2F	phospholipase A2, group IIF [Source:HGNC Symbol;Acc:30040]	6.13055	-6.07322	7.07275	-6.07322	-3.97458	-6.07322	-4.0344	-4.57949	1.10006	-0.80855	-6.07322	4.8917	1078.46	13.4763	-0.38068	14.4707	0	2.53887	-0.473555	3.26043	2.51026	7.60124	7.80474	-0.0482013	5.17375	-7.03002	6.11595	-7.03002	-4.93138	-7.03002	-4.9912	-5.53629	0.143263	-1.76535	-7.03002
3.53986e-224	5.37912e-222	ENSOARG00000014573	22:10205783-10240383	protein_coding	LIPM	lipase, family member M [Source:HGNC Symbol;Acc:23455]	6.3426	-0.647009	-1.20365	-5.33932	-6.07322	-6.07322	-6.07322	-5.07261	-6.07322	-6.07322	-6.07322	3.34383	1072.97	11.8028	3.93689	4.29266	0	-2.47245	-2.28434	-1.65858	0.714459	-2.03407	-1.87541	-1.57658	5.98308	-1.00653	-1.56318	-5.69884	-6.43274	-6.43274	-6.43274	-5.43214	-6.43274	-6.43274	-6.43274
3.9427e-224	5.94175e-222	ENSOARG00000003306	11:28509162-28523732	protein_coding	DHRS7C	dehydrogenase/reductase (SDR family) member 7C [Source:HGNC Symbol;Acc:32423]	-4.29876	-2.54971	-5.09463	-2.27251	-3.15367	-4.87186	-4.87956	-2.97158	-6.07322	-6.07322	8.66977	5.56024	1072.75	-2.10301	-0.0258423	-2.76582	0	-0.664306	-1.80248	-1.81473	-0.211599	-4.88795	-5.20676	10.8302	-6.30739	-4.55834	-7.10326	-4.28114	-5.1623	-6.88049	-6.88819	-4.98021	-8.08185	-8.08185	6.66114
2.35511e-223	3.52011e-221	ENSOARG00000013943	8:56718361-56732509	protein_coding	ARG1	arginase 1 [Source:HGNC Symbol;Acc:663]	0.30725	2.55152	3.99592	-6.07322	-6.07322	-6.07322	-5.51486	-5.33913	-4.94983	7.79389	-6.07322	4.25797	1069.15	7.47143	9.9737	11.1509	0	0.350783	0.2602	1.65377	1.78064	2.34759	14.9558	-0.0513043	0.0956152	2.33989	3.78429	-6.28486	-6.28486	-6.28486	-5.7265	-5.55077	-5.16146	7.58226	-6.28486
9.43694e-223	1.39905e-220	ENSOARG00000016477	17:71476176-71480306	protein_coding	SERPIND1	serpin peptidase inhibitor, clade D (heparin cofactor), member 1 [Source:HGNC Symbol;Acc:4838]	-4.63108	-0.647009	-6.07322	-5.06132	-6.07322	-4.87186	-6.07322	-5.34937	-6.07322	8.74949	-6.07322	5.03304	1066.35	1.19701	3.09995	-2.44364	0	-3.30939	-0.0687151	-2.52434	-0.732202	-2.53284	13.0559	-2.21663	-5.22563	-1.24156	-6.66777	-5.65587	-6.66777	-5.46641	-6.66777	-5.94392	-6.66777	8.15494	-6.66777
3.53599e-222	5.19989e-220	ENSOARG00000001573	13:60667341-60680717	protein_coding	MYLK2	myosin light chain kinase 2 [Source:HGNC Symbol;Acc:16243]	-3.42605	-6.07322	-2.65564	-2.90005	-3.97458	-1.81324	-1.51476	-1.58778	-1.98783	-1.48624	9.93756	6.80978	1063.69	-0.862836	-5.25539	-0.593675	0	-2.33584	0.00484014	0.747708	0.481143	-0.275173	0.643871	11.8276	-4.33755	-6.98472	-3.56714	-3.81155	-4.88608	-2.72474	-2.42626	-2.49928	-2.89933	-2.39774	9.02606
1.20179e-221	1.75318e-219	ENSOARG00000004919	23:54160042-54174143	protein_coding	DYNAP	dynactin associated protein [Source:HGNC Symbol;Acc:26808]	-6.07322	3.00821	7.44143	-4.65081	-6.07322	-6.07322	-4.49857	-6.07322	-6.07322	-6.07322	-6.07322	4.49454	1061.23	-2.62158	7.07145	12.0642	0	-3.00865	-2.96804	1.3956	-2.62846	-2.92068	-2.46679	-2.53754	-5.73132	3.35011	7.78334	-4.30891	-5.73132	-5.73132	-4.15667	-5.73132	-5.73132	-5.73132	-5.73132
1.93459e-221	2.79979e-219	ENSOARG00000014788	18:57825384-57832916	protein_coding	SERPINA10	serpin peptidase inhibitor, clade A (alpha-1 antiproteinase, antitrypsin), member 10 [Source:HGNC Symbol;Acc:15996]	-6.07322	-2.54971	-6.07322	-5.38472	-6.07322	-6.07322	-6.07322	-6.07322	-6.07322	7.56571	-6.07322	3.83971	1060.27	-1.76534	2.43882	-1.7671	0	-2.02056	-1.90431	-1.80409	-1.77581	-1.75851	12.7281	-1.71383	-6.5781	-3.05458	-6.5781	-5.88959	-6.5781	-6.5781	-6.5781	-6.5781	-6.5781	7.06084	-6.5781
4.09819e-221	5.88429e-219	ENSOARG00000020466	7:34414085-34447617	protein_coding	PLA2G4E	phospholipase A2, group IVE [Source:HGNC Symbol;Acc:24791]	4.71297	3.7882	6.68731	-6.07322	-6.07322	-4.87186	-3.23784	-4.58974	-6.07322	-6.07322	-0.871054	4.03242	1058.75	11.8861	10.4092	13.8122	0	-0.451416	2.57139	3.74732	2.53453	-0.191601	-0.0356861	6.6307	3.44993	2.52517	5.42427	-7.33626	-7.33626	-6.1349	-4.50088	-5.85277	-7.33626	-7.33626	-2.13409
1.42245e-220	2.02643e-218	ENSOARG00000008121	1:31284251-31329404	protein_coding	C8B	complement component 8, beta polypeptide [Source:HGNC Symbol;Acc:1353]	-5.03705	-0.331807	-6.07322	-6.07322	-2.63371	-6.07322	-6.07322	-5.31358	-6.07322	8.60879	-3.98737	4.92711	1056.25	2.56455	5.89067	0.0523084	0	3.53425	-0.579808	0.0891822	1.85514	-0.214809	15.6016	5.18049	-6.32806	-1.62282	-7.36424	-7.36424	-3.92472	-7.36424	-7.36424	-6.6046	-7.36424	7.31777	-5.27838
2.00372e-220	2.83238e-218	ENSOARG00000010165	25:35266467-35270853	protein_coding			-6.07322	-3.42941	-6.07322	-6.07322	-6.07322	-6.07322	-6.07322	-6.07322	-6.07322	7.53941	-6.07322	3.81443	1055.56	-0.00784199	3.32788	-0.00415898	0	-0.195637	-0.159602	0.045171	-0.0120555	-0.11722	14.6243	0.0302058	-7.40091	-4.7571	-7.40091	-7.40091	-7.40091	-7.40091	-7.40091	-7.40091	-7.40091	6.21172	-7.40091
6.58326e-220	9.23429e-218	ENSOARG00000015961	11:41006477-41009391	protein_coding	KRTAP16-1	keratin associated protein 16-1 [Source:HGNC Symbol;Acc:18916]	5.61049	-6.07322	-6.07322	-6.07322	-6.07322	-6.07322	-6.07322	-6.07322	-6.07322	-6.07322	-6.07322	3.37333	1053.16	13.2705	-0.356488	-0.109642	0	-0.356488	-0.517399	0.353529	-0.128804	-0.681794	0.658847	-0.0974072	4.94692	-6.73679	-6.73679	-6.73679	-6.73679	-6.73679	-6.73679	-6.73679	-6.73679	-6.73679	-6.73679
2.90313e-219	4.04111e-217	ENSOARG00000017250	7:9946729-9969339	protein_coding	BHMT	betaine--homocysteine S-methyltransferase [Source:HGNC Symbol;Acc:1047]	-6.07322	-1.30509	-6.07322	-2.43387	-3.15367	-2.42753	-4.27236	-6.07322	-5.00357	7.72162	-6.07322	3.99132	1050.17	-4.88726	1.0836	-4.87444	0	-0.836901	-0.496035	-1.67465	-4.87194	-2.90908	10.3883	-4.92593	-6.6466	-1.87846	-6.6466	-3.00725	-3.72704	-3.0009	-4.84574	-6.6466	-5.57694	7.14824	-6.6466
6.53571e-218	9.02869e-216	ENSOARG00000000377	1:102197573-102217016	protein_coding	LOR		5.3635	6.87477	-6.07322	-6.07322	-6.07322	-6.07322	-6.07322	-6.07322	-6.07322	-6.07322	-6.07322	3.34577	1043.89	12.6993	14.0208	0.0726501	0	0.0728711	0.265231	-0.14964	0.0763699	0.522039	-0.293732	0.0832871	7.72195	9.23323	-3.71477	-3.71477	-3.71477	-3.71477	-3.71477	-3.71477	-3.71477	-3.71477	-3.71477
1.36849e-217	1.87627e-215	ENSOARG00000008985	16:33267815-33338265	protein_coding	C6	complement component 6 [Source:HGNC Symbol;Acc:1339]	-1.71515	0.336116	-6.07322	-2.24503	1.35068	3.10946	1.13599	-0.494701	-1.38668	10.6258	-1.79465	6.94006	1042.4	0.933799	3.07532	-4.96875	0	4.09419	6.07432	3.50835	1.94456	1.54553	12.7634	1.92738	-3.24622	-1.19495	-7.60429	-3.7761	-0.180386	1.57839	-0.395075	-2.02577	-2.91775	9.09476	-3.32572
7.20897e-217	9.81012e-215	ENSOARG00000007887	25:29508765-29515508	protein_coding			-4.56801	-6.07322	-6.07322	-3.97894	-6.07322	-6.07322	-5.12906	-4.30147	-6.07322	-1.49323	6.61785	3.36045	1039.05	-1.12203	-3.50834	-3.71193	0	-3.50834	-3.58353	-1.9313	-0.663407	-3.66453	2.03751	10.0521	-5.37784	-6.88305	-6.88305	-4.78876	-6.88305	-6.88305	-5.93889	-5.1113	-6.88305	-2.30306	5.80802
3.55466e-215	4.80143e-213	ENSOARG00000007804	10:16502009-16560392	protein_coding	CPB2	carboxypeptidase B2 (plasma) [Source:HGNC Symbol;Acc:2300]	-6.07322	-6.07322	-3.54807	-6.07322	-6.07322	-4.87186	-5.26342	-6.07322	-4.13819	7.6068	-5.03054	3.88596	1031.2	0.0635073	-0.306103	3.62093	0	-0.306103	2.81277	2.40395	0.0450578	4.02714	14.4467	2.99323	-6.42032	-6.42032	-3.89517	-6.42032	-6.42032	-5.21896	-5.61051	-6.42032	-4.48529	7.2597	-5.37763
1.17892e-214	1.58071e-212	ENSOARG00000014233	1:123545863-123578504	protein_coding			5.49124	-6.07322	-6.07322	-6.07322	-6.07322	-6.07322	-6.07322	-6.07322	-6.07322	-6.07322	-6.07322	3.36958	1028.78	13.2342	-0.22101	-0.126589	0	-0.22101	-0.466011	0.368262	-0.140832	-0.703417	0.804838	-0.149035	6.64967	-4.91479	-4.91479	-4.91479	-4.91479	-4.91479	-4.91479	-4.91479	-4.91479	-4.91479	-4.91479
3.05999e-211	4.07291e-209	ENSOARG00000016717	6:6265305-6302669	protein_coding	MYOZ2	Ovis aries myozenin 2 (MYOZ2), mRNA. [Source:RefSeq mRNA;Acc:NM_001199222]	-5.03705	-2.54971	-6.07322	-5.06132	-3.15367	-6.07322	-5.51486	-4.85632	-6.07322	-6.07322	6.01547	3.0901	1012.93	-0.053783	1.39928	-2.60423	0	0.76082	-3.07536	-0.495287	0.406634	-3.09255	-2.21584	10.7799	-4.73304	-2.2457	-5.76922	-4.75731	-2.84966	-5.76922	-5.21085	-4.55232	-5.76922	-5.76922	6.31948
3.35304e-211	4.43063e-209	ENSOARG00000012900	4:76188499-76192761	protein_coding	IGFBP1	insulin-like growth factor-binding protein 1 precursor [Source:RefSeq peptide;Acc:NP_001138649]	-2.78134	-2.00718	-6.07322	-6.07322	-6.07322	-6.07322	-5.12906	-6.07322	-6.07322	7.50446	-4.73684	4.18725	1012.75	5.22888	6.77673	-0.0492364	0	1.75441	0.831585	1.7107	-0.0134012	0.198418	15.2792	2.67072	-2.50381	-1.72965	-5.79569	-5.79569	-5.79569	-5.79569	-4.85153	-5.79569	-5.79569	7.78199	-4.4593
3.73008e-211	4.89338e-209	ENSOARG00000014390	19:43836052-43850342	protein_coding	ASB14	ankyrin repeat and SOCS box containing 14 [Source:HGNC Symbol;Acc:19766]	-5.05436	-6.07322	-6.07322	-3.90687	-3.97458	-6.07322	-4.79863	-3.71091	-4.59047	-6.07322	6.91005	3.68227	1012.53	-1.28247	-3.61716	-3.83912	0	-0.69761	-3.64448	-0.174347	0.11895	-0.652038	-3.90098	10.1957	-6.0956	-7.11447	-7.11447	-4.94812	-5.01582	-7.11447	-5.83987	-4.75216	-5.63171	-7.11447	5.86881
1.09108e-210	1.42114e-208	ENSOARG00000001219	8:63935536-63987693	protein_coding	TXLNB	taxilin beta [Source:HGNC Symbol;Acc:21617]	0.748242	-6.07322	-2.08367	-1.32584	-1.70178	-1.20949	-0.366763	-0.428028	-0.637418	-2.73853	10.0738	6.9551	1010.37	2.26134	-5.29188	-0.862716	0	0.0442878	0.228045	0.910596	0.998899	0.749261	0.699984	11.3625	-1.17434	-7.9958	-4.00625	-3.24842	-3.62436	-3.13207	-2.28934	-2.35061	-2.56	-4.66111	8.15122
1.96315e-210	2.53886e-208	ENSOARG00000005748	26:1180913-1244337	protein_coding	MYOM2	myomesin 2 [Source:HGNC Symbol;Acc:7614]	-3.2427	-2.54971	-4.69425	-4.26175	-6.07322	-3.31308	-3.34254	-3.61631	-6.07322	-1.77074	10.0803	6.99945	1009.19	0.932576	1.49726	-0.721296	0	-2.96212	0.606472	2.26381	1.0077	-2.90229	2.18767	14.1984	-5.40427	-4.71127	-6.85582	-6.42332	-8.23479	-5.47464	-5.5041	-5.77787	-8.23479	-3.9323	7.91874
2.01331e-210	2.5854e-208	ENSOARG00000002395	23:45678576-45696614	protein_coding	SLC14A1	Ovis aries solute carrier family 14 (urea transporter), member 1 (Kidd blood group) (SLC14A1), mRNA. [Source:RefSeq mRNA;Acc:NM_001163054]	-2.19608	-3.42941	6.90241	-2.32388	-3.15367	-1.60805	-1.85022	-2.37838	-0.866601	-4.67695	-6.07322	3.91587	1009.14	0.294216	-1.69719	9.31086	0	-1.39979	0.407022	0.967629	0.23133	1.47916	-1.85781	-4.62588	-2.59662	-3.82995	6.50187	-2.72442	-3.55421	-2.00858	-2.25076	-2.77892	-1.26714	-5.07749	-6.47376
4.42952e-210	5.64841e-208	ENSOARG00000016900	3:133566405-133604565	protein_coding	KRT1	keratin 1 [Source:HGNC Symbol;Acc:6412]	9.36789	3.81242	3.28789	-5.11256	-6.07322	-6.07322	-5.51486	-5.31358	-4.94983	-6.07322	-5.04577	6.6099	1007.55	14.1378	8.1225	8.05048	0	-2.76238	-2.63634	-0.872353	-0.710339	-0.235781	-2.68179	0.325125	8.18647	2.631	2.10647	-6.29398	-7.25464	-7.25464	-6.69628	-6.495	-6.13125	-7.25464	-6.22719
6.69871e-210	8.48271e-208	ENSOARG00000002159	1:191436041-191437795	protein_coding	LRRC15	leucine rich repeat containing 15 [Source:HGNC Symbol;Acc:20818]	6.04934	-1.05091	-6.07322	-3.60671	-3.97458	-6.07322	-5.2769	-5.33913	-3.46707	-6.07322	-4.73684	3.88083	1006.71	9.44408	0.719071	-4.47037	0	-2.36132	-5.18842	-2.37885	-2.62515	-1.53403	-4.20357	-1.4586	5.23787	-1.86238	-6.88469	-4.41818	-4.78605	-6.88469	-6.08837	-6.1506	-4.27854	-6.88469	-5.54831
8.41715e-210	1.05853e-207	ENSOARG00000004609	13:42268085-42268534	protein_coding	CALML5	calmodulin-like 5 [Source:HGNC Symbol;Acc:18180]	6.35078	1.18647	-3.90354	-6.07322	-6.07322	-6.07322	-6.07322	-6.07322	-6.07322	-6.07322	-6.07322	3.33145	1006.25	13.5323	7.63871	3.90728	0	-0.616271	-0.472365	0.121646	-0.0218339	-0.289104	-0.0348376	0.142831	7.50278	2.33847	-2.75154	-4.92122	-4.92122	-4.92122	-4.92122	-4.92122	-4.92122	-4.92122	-4.92122
4.53322e-208	5.66187e-206	ENSOARG00000010516	20:27100977-27104737	protein_coding	CDSN	corneodesmosin [Source:HGNC Symbol;Acc:1802]	7.4826	-0.0732743	-2.59724	-6.07322	-6.07322	-6.07322	-6.07322	-6.07322	-6.07322	-6.07322	-6.07322	4.55105	998.215	14.6637	7.15638	5.57669	0	0.16775	-0.0722973	0.123029	-0.0638766	-0.302959	0.368212	-0.121511	6.78928	-0.766594	-3.29056	-6.76654	-6.76654	-6.76654	-6.76654	-6.76654	-6.76654	-6.76654	-6.76654
4.41736e-206	5.47963e-204	ENSOARG00000020906	3:203320049-203324978	protein_coding			-6.07322	10.9283	-6.07322	-6.07322	-6.07322	-6.07322	-6.07322	-6.07322	-3.50745	-2.41633	-6.07322	6.22824	988.982	0.0862087	17.0385	0.0894965	0	-0.963103	-0.636115	0.0564642	0.0374563	4.95478	4.39708	0.38875	-7.03596	9.96561	-7.03596	-7.03596	-7.03596	-7.03596	-7.03596	-7.03596	-4.47018	-3.37907	-7.03596
8.92622e-206	1.09979e-203	ENSOARG00000000784	1:123650073-123650480	protein_coding	KRTAP15-1	keratin associated protein 15-1 [Source:HGNC Symbol;Acc:18927]	4.47963	-6.07322	-6.07322	-6.07322	-6.07322	-6.07322	-6.07322	-6.07322	-6.07322	-6.07322	-6.07322	3.46878	987.564	13.4048	-0.96627	-0.0432262	0	-0.96627	-0.848492	0.37619	-0.0951449	-0.701011	0.203547	0.168121	5.77299	-4.77986	-4.77986	-4.77986	-4.77986	-4.77986	-4.77986	-4.77986	-4.77986	-4.77986	-4.77986
1.77187e-205	2.16846e-203	ENSOARG00000003842	14:62547954-62551622	protein_coding	A1BG	alpha-1-B glycoprotein [Source:HGNC Symbol;Acc:5]	-1.12366	0.91541	0.924725	0.136018	0.18436	0.0685116	-0.16053	0.340578	-1.23084	9.53308	0.699531	6.05654	986.182	-0.915513	1.12359	0.684402	0	0.38877	0.393158	-0.456	0.103372	-1.00103	9.07163	0.439138	-1.67947	0.359594	0.368909	-0.419799	-0.371456	-0.487305	-0.716346	-0.215238	-1.78666	8.97726	0.143715
2.19441e-204	2.66767e-202	ENSOARG00000017457	4:105907079-105918079	protein_coding	PIP	prolactin-induced protein [Source:HGNC Symbol;Acc:8993]	-3.41149	-1.05091	7.2929	-5.11256	-6.07322	-6.07322	-4.99181	-6.07322	-6.07322	-6.07322	-6.07322	4.27876	981.107	2.31327	2.47373	11.9584	0	-3.52622	-3.30305	-0.120745	-2.70338	-3.00056	-2.8387	-2.45045	-2.22049	0.140092	8.4839	-3.92156	-4.88223	-4.88223	-3.80081	-4.88223	-4.88223	-4.88223	-4.88223
3.39585e-204	4.10088e-202	ENSOARG00000008046	3:162414465-162419572	protein_coding	RDH16	retinol dehydrogenase 16 (all-trans) [Source:HGNC Symbol;Acc:29674]	1.82627	-0.647009	-2.69832	-6.07322	4.21662	-2.88473	-3.71047	-2.94708	-5.00357	8.63352	-6.07322	5.2264	980.227	9.39041	5.61163	4.49609	0	10.4916	3.76357	4.12195	4.33631	2.06806	15.5066	0.295294	1.74903	-0.724252	-2.77556	-6.15047	4.13938	-2.96197	-3.78772	-3.02432	-5.08081	8.55628	-6.15047
8.99119e-204	1.07865e-201	ENSOARG00000008050	18:45754809-45767637	protein_coding	PAX9	paired box 9 [Source:HGNC Symbol;Acc:8623]	0.0516098	5.94144	6.47695	-5.23916	-6.07322	-5.24692	-4.71854	-5.33913	-3.04737	-6.07322	-5.03054	3.73878	978.264	5.47522	11.4727	11.8011	0	-1.54179	0.463404	0.670347	-0.0389032	2.20661	-1.78596	0.953322	-0.1106	5.77923	6.31474	-5.40137	-6.23543	-5.40913	-4.88075	-5.50134	-3.20958	-6.23543	-5.19275
5.34465e-203	6.36992e-201	ENSOARG00000010356	20:7958153-7976693	protein_coding	IP6K3	inositol hexakisphosphate kinase 3 [Source:HGNC Symbol;Acc:17269]	-3.54732	-2.54971	-5.40042	-4.27849	-6.07322	-5.24692	-6.07322	-3.89214	-0.711863	-4.54485	6.23516	2.9836	974.669	0.327888	1.09864	-1.44475	0	-3.36074	-1.23768	-3.02803	0.852464	3.06463	-0.137631	10.2315	-3.78488	-2.78727	-5.63799	-4.51606	-6.31079	-5.48449	-6.31079	-4.12971	-0.949427	-4.78241	5.99759
1.76438e-201	2.08918e-199	ENSOARG00000020478	1:195682402-195845074	protein_coding	TP63	tumor protein p63 [Source:HGNC Symbol;Acc:15979]	7.54242	6.35959	7.48459	-2.95935	-3.97458	-3.68814	-3.94021	-3.40258	-1.86158	-4.54485	5.37853	5.68914	967.618	9.50954	8.23542	9.46643	0	-2.27772	-2.16642	-0.925621	-1.39733	0.0484741	-2.19067	7.40638	6.38021	5.19738	6.32238	-4.12156	-5.13679	-4.85035	-5.10242	-4.56479	-3.02379	-5.70706	4.21632
2.68348e-201	3.15699e-199	ENSOARG00000009008	X:2518450-2524618	protein_coding			-5.33311	10.8723	-6.07322	-6.07322	-6.07322	-5.24692	-6.07322	-5.31358	-3.86234	-0.574605	-6.07322	6.17288	966.772	1.87672	17.8125	0.0755036	0	-0.133055	2.20227	-0.122127	1.90348	4.78401	6.21945	0.126996	-5.32733	10.8781	-6.06744	-6.06744	-6.06744	-5.24114	-6.06744	-5.3078	-3.85656	-0.568823	-6.06744
7.08052e-201	8.2765e-199	ENSOARG00000007817	1:109040789-109041779	protein_coding	CRP	C-reactive protein, pentraxin-related [Source:HGNC Symbol;Acc:2367]	-4.57752	1.81699	-5.3689	-5.11256	-6.07322	-5.24692	-6.07322	-4.40919	-6.07322	11.1994	-5.04577	7.55282	964.815	-0.022727	6.64238	-1.06067	0	-2.24479	-0.475017	-2.50941	1.48562	-2.86322	16.1004	0.112816	-4.17015	2.22435	-4.96153	-4.70519	-5.66586	-4.83956	-5.66586	-4.00183	-5.66586	11.6067	-4.6384
2.44955e-200	2.84507e-198	ENSOARG00000001073	JH921995.1:21-687	protein_coding			-6.07322	8.37269	-6.07322	2.87604	-6.07322	-6.07322	-6.07322	-6.07322	-6.07322	-6.07322	-6.07322	3.9301	962.312	-11.3875	3.31133	-11.3585	0	-12.1346	-12.0725	-10.9219	-11.4019	-11.9979	-10.9839	-11.1986	-4.65433	9.79158	-4.65433	4.29493	-4.65433	-4.65433	-4.65433	-4.65433	-4.65433	-4.65433	-4.65433
2.68766e-200	3.10187e-198	ENSOARG00000013004	22:19923049-19993363	protein_coding	ABCC2	ATP-binding cassette, sub-family C (CFTR/MRP), member 2 [Source:HGNC Symbol;Acc:53]	-0.709267	0.336116	0.141285	-1.27151	7.9189	-1.01745	-3.28017	-1.0235	-0.0531471	9.35242	-1.21261	5.93214	962.125	0.746941	0.938735	1.62894	0	8.52999	0.0171526	-0.945445	0.274787	0.976303	10.5962	0.376638	-2.92184	-1.87645	-2.07128	-3.48408	5.70633	-3.23002	-5.49274	-3.23607	-2.26572	7.13985	-3.42517
6.20828e-200	7.12e-198	ENSOARG00000005822	14:47687488-47689265	protein_coding	LGALS7	lectin, galactoside-binding, soluble, 7	5.23408	3.30989	5.36419	-3.95227	-6.07322	-6.07322	-6.07322	-6.07322	-6.07322	-6.07322	-6.07322	3.34461	960.437	8.59084	6.67608	8.69942	0	-3.70596	-3.83794	-3.63038	-3.77675	-3.97582	-3.48919	-3.7988	6.06801	4.14382	6.19812	-3.11835	-5.2393	-5.2393	-5.2393	-5.2393	-5.2393	-5.2393	-5.2393
7.86032e-200	8.95831e-198	ENSOARG00000002313	1:200904235-200905122	protein_coding			5.79038	-1.05091	-1.28176	-6.07322	-6.07322	-5.24692	-6.07322	-6.07322	-6.07322	-6.07322	-6.07322	2.78546	959.961	12.8567	5.85773	5.76751	0	-0.142219	1.9493	0.0590689	-0.0213722	-0.152407	0.0732862	0.00384475	5.96175	-0.879537	-1.1104	-5.90185	-5.90185	-5.07555	-5.90185	-5.90185	-5.90185	-5.90185	-5.90185
9.41159e-200	1.06596e-197	ENSOARG00000010685	20:27166043-27167652	protein_coding	MUC22	mucin 22 [Source:HGNC Symbol;Acc:39755]	-6.07322	10.8049	-3.95864	-6.07322	-6.07322	-6.07322	-6.07322	-6.07322	-4.59047	-2.69327	-6.07322	6.10535	959.598	0.0728602	16.4843	5.52062	0	-1.3938	-1.04421	0.237947	0.00194199	2.51714	4.10231	0.602402	-6.3824	10.4957	-4.26782	-6.3824	-6.3824	-6.3824	-6.3824	-6.3824	-4.89964	-3.00245	-6.3824
4.22011e-199	4.75023e-197	ENSOARG00000011323	5:17629206-17633291	protein_coding	NMRK2	nicotinamide riboside kinase 2 [Source:HGNC Symbol;Acc:17871]	-3.01945	-6.07322	-6.07322	-5.11256	-6.07322	-6.07322	-6.07322	-3.84421	-6.07322	-6.07322	6.60145	3.49524	956.571	2.3414	-2.65535	-2.72542	0	-2.65535	-2.85338	-2.47982	1.01429	-3.0493	-2.23968	11.1383	-2.25333	-5.30711	-5.30711	-4.34645	-5.30711	-5.30711	-5.30711	-3.0781	-5.30711	-5.30711	7.36756
1.54556e-197	1.72904e-195	ENSOARG00000003857	1:234351940-234380044	protein_coding	AADACL2	arylacetamide deacetylase-like 2 [Source:HGNC Symbol;Acc:24427]	5.82672	-3.42941	-6.07322	-6.07322	-6.07322	-6.07322	-6.07322	-6.07322	-4.94983	-6.07322	-6.07322	2.8961	949.309	12.9869	3.05527	0.0281696	0	-0.468245	-0.304284	0.0362547	0.00803892	2.15596	-0.125955	0.136828	4.28075	-4.97538	-7.61919	-7.61919	-7.61919	-7.61919	-7.61919	-7.61919	-6.49579	-7.61919	-7.61919
1.84984e-197	2.05682e-195	ENSOARG00000015869	2:113546990-113613978	protein_coding	GEF4-like	code proein as member of Guanine nucleotide exchange factor	5.19645	5.65709	6.18175	-3.08295	-6.07322	-4.29777	-3.19095	-3.84539	-5.00357	-3.95745	-4.00308	3.95931	948.947	8.39469	8.61762	9.30936	0	-4.11248	0.0498032	-0.263589	-0.247442	-1.70974	0.203563	-0.24219	3.58717	4.04781	4.57247	-4.69223	-7.6825	-5.90706	-4.80024	-5.45467	-6.61285	-5.56673	-5.61236
4.54453e-196	5.02239e-194	ENSOARG00000009050	3:162920793-162921999	protein_coding	APOF	apolipoprotein F [Source:HGNC Symbol;Acc:615]	-2.08425	-1.30509	-6.07322	-6.07322	-6.07322	-6.07322	-6.07322	-5.03254	-6.07322	7.1706	-6.07322	3.60294	942.489	5.23337	5.47383	-0.0765447	0	-0.267585	-0.383491	0.235103	2.42914	-0.505526	14.8088	-0.062931	-2.04772	-1.26856	-6.0367	-6.0367	-6.0367	-6.0367	-6.0367	-4.99601	-6.0367	7.20713	-6.0367
2.43723e-195	2.67729e-193	ENSOARG00000019627	2:219569709-219587585	protein_coding	PLCD4	phospholipase C, delta 4 [Source:HGNC Symbol;Acc:9062]	-1.9374	-1.05091	-2.15592	-1.54401	-2.63371	-0.319034	-1.59447	-0.789936	-1.38004	0.310236	7.25746	4.08099	939.102	0.0714948	0.640322	-0.514721	0	-0.988183	1.2438	-0.0115045	0.759009	0.397903	2.06274	8.80822	-3.13966	-2.25317	-3.35818	-2.74627	-3.83597	-1.5213	-2.79673	-1.9922	-2.5823	-0.892025	6.0552
1.66489e-194	1.81792e-192	ENSOARG00000020837	3:59796672-59801932	protein_coding	IL36RN	interleukin 36 receptor antagonist [Source:HGNC Symbol;Acc:15561]	4.85661	4.39688	6.21873	-4.93982	-6.07322	-6.07322	-4.58263	-6.07322	-6.07322	-6.07322	-6.07322	3.78089	935.226	8.93291	7.79314	10.3195	0	-3.67645	-3.49172	0.570998	-3.11023	-3.247	-3.25756	-2.95086	3.38101	2.92127	4.74313	-6.41543	-7.54883	-7.54883	-6.05823	-7.54883	-7.54883	-7.54883	-7.54883
1.96487e-194	2.1327e-192	ENSOARG00000007026	1:247660667-247687648	protein_coding	RBP2	retinol binding protein 2, cellular [Source:HGNC Symbol;Acc:9920]	-2.55907	4.2568	6.71288	-1.09074	8.17547	-6.07322	-4.99181	-4.13843	-6.07322	-6.07322	-6.07322	4.66035	934.891	-1.76315	3.79623	7.57799	0	7.71542	-7.30677	-3.98318	-3.2463	-6.99718	-6.72269	-6.32548	-1.42301	5.39286	7.84894	0.0453242	9.31153	-4.93716	-3.85575	-3.00237	-4.93716	-4.93716	-4.93716
2.52612e-194	2.72567e-192	ENSOARG00000019855	3:39313956-39319994	protein_coding			-6.07322	-6.07322	-6.07322	-1.75348	10.6681	-6.07322	-6.07322	-4.30462	-6.07322	-6.07322	-6.07322	5.98349	934.385	-7.061	-8.35461	-7.03434	0	9.38674	-8.0882	-6.72923	-2.50277	-7.7049	-7.20962	-6.63433	-5.23156	-5.23156	-5.23156	-0.911818	11.5098	-5.23156	-5.23156	-3.46296	-5.23156	-5.23156	-5.23156
5.6783e-194	6.09081e-192	ENSOARG00000000540	3:205399378-205457431	protein_coding			1.94152	-2.00718	-1.52755	-5.33932	-2.2523	-4.87186	-4.1806	-2.35477	-4.94983	8.24232	-3.51291	4.99001	932.751	7.40108	2.61084	3.86991	0	2.35748	0.653419	2.00123	3.14995	0.193035	13.6571	3.04361	-1.01472	-4.96343	-4.48379	-8.29556	-5.20855	-7.82811	-7.13685	-5.31101	-7.90607	5.28608	-6.46915
3.10858e-193	3.31491e-191	ENSOARG00000011222	3:92818211-92830253	protein_coding	CLEC4F	C-type lectin domain family 4, member F [Source:HGNC Symbol;Acc:25357]	-4.56801	-1.61384	-1.71438	-4.37281	-6.07322	-3.23094	-2.29947	-3.12154	5.83046	6.44481	-6.07322	3.48733	929.321	-0.609139	2.69747	2.42546	0	-2.72874	0.463226	1.93576	0.822874	9.67828	10.7781	-3.26645	-5.50611	-2.55194	-2.65248	-5.31091	-7.01132	-4.16903	-3.23757	-4.05963	4.89236	5.50671	-7.01132
8.84727e-193	9.37965e-191	ENSOARG00000011261	15:79179627-79199777	protein_coding			-3.60957	-1.30509	-6.07322	-3.75289	-2.2523	-6.07322	-6.07322	-6.07322	0.649967	7.51366	-5.04577	3.97781	927.211	0.580286	0.992648	-3.95168	0	0.0201824	-4.52302	-3.89938	-3.98857	3.72852	10.5039	-0.929593	-3.46715	-1.16267	-5.93081	-3.61047	-2.10989	-5.93081	-5.93081	-5.93081	0.792384	7.65608	-4.90335
1.15795e-192	1.22054e-190	ENSOARG00000004817	5:2363866-2371887	protein_coding	OBSCN	obscurin, cytoskeletal calmodulin and titin-interacting RhoGEF [Source:HGNC Symbol;Acc:15719]	-4.13829	-3.42941	-1.47932	-3.54459	-3.15367	-6.07322	-3.22398	-2.23019	-3.66328	-1.49323	9.07537	5.93425	926.668	1.56044	0.19629	2.34677	0	0.493694	-3.18193	1.33863	1.54626	1.72196	1.95132	13.0182	-6.01721	-5.30833	-3.35825	-5.42351	-5.03259	-7.95214	-5.1029	-4.10911	-5.54221	-3.37215	7.19645
1.76467e-192	1.84935e-190	ENSOARG00000017449	12:77707815-77756699	protein_coding	CACNA1S	calcium channel, voltage-dependent, L type, alpha 1S subunit [Source:HGNC Symbol;Acc:1397]	-1.83234	-0.0732743	-3.27211	-1.84093	0.303145	-1.21092	-2.6646	-2.99853	-3.44057	-4.54485	8.85711	5.75018	925.818	0.185581	1.14496	-1.36751	0	1.52399	1.27844	0.351172	-1.16177	-0.273298	-2.59568	10.9019	-4.2677	-2.50864	-5.70747	-4.27629	-2.13222	-3.64628	-5.09996	-5.43389	-5.87593	-6.98021	6.42175
1.18799e-191	1.23788e-189	ENSOARG00000004189	12:40722760-40736884	protein_coding	MASP2	mannan-binding lectin serine peptidase 2 [Source:HGNC Symbol;Acc:6902]	-0.493313	-2.54971	-6.07322	-6.07322	-3.15367	-5.24692	-5.2769	-4.0605	-3.00424	7.28071	-2.34853	3.59405	921.971	6.59975	4.25123	0.000451308	0	3.61276	1.94093	1.78581	3.41078	4.17296	14.3547	4.7268	-1.5862	-3.64259	-7.16611	-7.16611	-4.24655	-6.33981	-6.36978	-5.15339	-4.09713	6.18782	-3.44142
3.86029e-191	3.99956e-189	ENSOARG00000015996	3:172350642-172520400	protein_coding	STAB2	stabilin 2 [Source:HGNC Symbol;Acc:18629]	-1.93873	-1.30509	-3.94334	-0.780243	-0.859345	-0.529944	-1.90996	-2.58757	6.48117	7.99218	-4.73684	4.74314	919.594	-1.32871	-0.912608	-2.5508	0	-0.459714	-0.132766	-1.34794	-1.89353	6.90477	8.5622	-3.70589	-4.87702	-4.24337	-6.88163	-3.71853	-3.79763	-3.46823	-4.84825	-5.52585	3.54289	5.0539	-7.67512
6.12909e-191	6.31434e-189	ENSOARG00000015836	11:61998329-62006804	protein_coding	CACNG1	calcium channel, voltage-dependent, gamma subunit 1 [Source:HGNC Symbol;Acc:1405]	-6.07322	-6.07322	-6.07322	-6.07322	-3.15367	-6.07322	-4.97693	-6.07322	-6.07322	-6.07322	6.11938	2.81338	918.661	-0.00569481	0.223618	-0.00698507	0	4.04454	0.142963	3.22637	0.00047404	0.0567661	0.0338559	13.2214	-4.91157	-4.91157	-4.91157	-4.91157	-1.99202	-4.91157	-3.81528	-4.91157	-4.91157	-4.91157	7.28103
6.51792e-191	6.67721e-189	ENSOARG00000017175	3:133950798-133959380	protein_coding	KRT-IIHb3L/LOC101113055	Chimpanzee ortho keratin86	4.67414	-6.07322	-6.07322	-6.07322	-6.07322	-6.07322	-6.07322	-6.07322	-6.07322	-6.07322	-6.07322	3.29489	918.537	13.1071	-0.155132	-0.145215	0	-0.155132	-0.467567	0.410903	-0.15805	-0.758221	0.984933	-0.189614	4.31687	-6.43049	-6.43049	-6.43049	-6.43049	-6.43049	-6.43049	-6.43049	-6.43049	-6.43049	-6.43049
2.58912e-189	2.63757e-187	ENSOARG00000004837	14:45291664-45296230	protein_coding	SBSN	suprabasin [Source:HGNC Symbol;Acc:24950]	9.10734	8.01783	2.65864	1.62106	1.40482	1.55089	1.25735	2.26372	2.42646	0.994579	1.86731	6.2788	911.108	7.27388	6.30308	0.861678	0	-0.313936	-0.125636	-0.520732	0.461511	0.777146	-0.893069	0.0326775	8.2698	7.18029	1.82111	0.783517	0.567281	0.713352	0.419814	1.42618	1.58892	0.157039	1.02977
4.21232e-188	4.26732e-186	ENSOARG00000011077	16:38069831-38095503	protein_coding			-1.07057	-0.834869	-1.6359	-1.11804	-3.15367	-1.96621	-3.05814	-2.66906	-2.12019	8.16384	-4.41867	4.45581	905.48	0.163209	-0.331896	-0.434604	0	-2.73009	-1.2633	-1.64811	-1.67091	-1.12454	9.27901	-2.19229	-1.72317	-1.48747	-2.28851	-1.77064	-3.80627	-2.61881	-3.71074	-3.32166	-2.77279	7.51124	-5.07127
1.96901e-187	1.9837e-185	ENSOARG00000006342	23:25838407-25847665	protein_coding	TTR	Transthyretin [Source:UniProtKB/Swiss-Prot;Acc:P12303]	-5.03705	1.18647	-4.79157	-2.21129	-0.0144477	-3.9822	1.86554	1.29254	-6.07322	10.6519	-5.03054	7.13526	902.368	-3.58394	1.33311	-2.94717	0	0.126046	-2.0597	3.05902	2.53605	-6.4287	11.6583	-3.04321	-5.48489	0.738625	-5.23941	-2.65913	-0.462291	-4.43004	1.4177	0.844696	-6.52107	10.2041	-5.47838
5.08091e-187	5.09068e-185	ENSOARG00000004804	14:45254953-45258246	protein_coding	KRTDAP	keratinocyte differentiation-associated protein [Source:HGNC Symbol;Acc:16313]	7.18903	7.22833	7.14115	-4.71274	-6.07322	-5.24692	-4.49857	-6.07322	-6.07322	-6.07322	-6.07322	5.37193	900.456	10.6247	10.175	10.6603	0	-4.12651	-1.8796	0.205743	-3.73007	-3.77714	-3.87485	-3.62622	8.88335	8.92265	8.83547	-3.01842	-4.3789	-3.5526	-2.80425	-4.3789	-4.3789	-4.3789	-4.3789
7.05286e-187	7.02781e-185	ENSOARG00000018093	11:50211686-50212510	protein_coding	PPP1R27	protein phosphatase 1, regulatory subunit 27 [Source:HGNC Symbol;Acc:16813]	-4.73243	-6.07322	-5.09255	-3.98959	-6.07322	-6.07322	-3.3726	-5.06111	-4.59047	-2.7026	10.072	6.95961	899.794	-0.0762608	-3.67358	-1.10496	0	-3.67358	-3.56146	1.07305	-0.972103	-0.468538	0.700991	13.7065	-3.62774	-4.96853	-3.98785	-2.88489	-4.96853	-4.96853	-2.2679	-3.95641	-3.48577	-1.5979	11.1767
4.23923e-186	4.20122e-184	ENSOARG00000013841	1:60762496-60794538	protein_coding			-2.20926	0.0404678	-5.40042	-6.07322	-6.07322	-4.62635	-5.51486	-4.61528	-1.85304	8.13574	-1.7396	4.74751	896.175	6.00013	6.73679	1.66323	0	-0.366446	3.02234	1.90211	2.52883	4.97721	15.5135	5.54663	-2.24207	0.00766164	-5.43323	-6.10603	-6.10603	-4.65915	-5.54767	-4.64809	-1.88585	8.10294	-1.77241
1.5401e-185	1.51804e-183	ENSOARG00000018701	24:2109485-2117255	protein_coding	PRSS27	protease, serine 27 [Source:HGNC Symbol;Acc:15475]	0.502783	7.51453	5.23593	-5.33932	-6.07322	-6.07322	-5.12906	-6.07322	-6.07322	-4.54485	-6.07322	3.56585	893.571	6.02927	12.1697	10.7069	0	-2.41801	-2.29357	0.168133	-1.80558	-2.13745	1.14491	-1.6367	0.557175	7.56892	5.29032	-5.28493	-6.01883	-6.01883	-5.07467	-6.01883	-6.01883	-4.49045	-6.01883
3.70632e-185	3.63359e-183	ENSOARG00000019300	3:138238132-138280543	protein_coding	PFKM	phosphofructokinase, muscle [Source:HGNC Symbol;Acc:8877]	4.62599	1.90972	3.26798	3.11162	2.83465	3.16974	2.68554	3.18468	1.85546	3.20356	10.6582	7.60233	891.799	1.44196	-1.36931	0.0776063	0	-0.443031	0.08511	-0.542981	0.00848568	-1.27549	-0.125775	7.43184	3.26534	0.549073	1.90734	1.75098	1.474	1.80909	1.32489	1.82403	0.49481	1.84292	9.29752
3.74469e-185	3.65158e-183	ENSOARG00000006134	2:9583152-9609521	protein_coding	AMBP	alpha-1-microglobulin/bikunin precursor [Source:HGNC Symbol;Acc:453]	-4.1114	1.75168	-5.3689	-3.60671	-0.624329	-2.95331	-1.29958	-3.75816	-6.07322	11.4555	-6.07322	7.77926	891.778	-1.01321	3.93925	-2.7278	0	1.54981	-0.506379	1.41724	-0.458277	-4.69991	14.3168	-4.29639	-4.50865	1.35443	-5.76615	-4.00397	-1.02158	-3.35056	-1.69683	-4.15542	-6.47048	11.0582	-6.47048
5.61469e-185	5.44595e-183	ENSOARG00000017889	X:61814079-61984770	protein_coding	PHKA1	phosphorylase kinase, alpha 1 (muscle) [Source:HGNC Symbol;Acc:8925]	3.82596	3.8441	3.96322	4.02051	4.04826	3.65197	3.64883	3.7702	3.90452	3.94168	9.14632	6.28635	890.961	-0.204082	-0.0787703	-0.0659732	0	0.125486	-0.253405	-0.377417	-0.256839	-0.0376394	-0.118655	5.15908	1.91791	1.93605	2.05518	2.11246	2.14021	1.74393	1.74079	1.86215	1.99648	2.03364	7.23828
2.90556e-184	2.80333e-182	ENSOARG00000000990	1:123832085-123832843	protein_coding	KRTAP24-1	Keratin-associated protein KAP24-1 [Source:UniProtKB/TrEMBL;Acc:J7GWF2]	4.74885	-6.07322	-6.07322	-6.07322	-6.07322	-6.07322	-6.07322	-6.07322	-6.07322	-6.07322	-6.07322	2.99495	887.643	12.8614	-0.475727	-0.108308	0	-0.475727	-0.596628	0.386445	-0.133249	-0.723174	0.646352	-0.0718918	5.14668	-5.67539	-5.67539	-5.67539	-5.67539	-5.67539	-5.67539	-5.67539	-5.67539	-5.67539	-5.67539
2.27053e-183	2.17912e-181	ENSOARG00000020420	3:193676598-193750422	protein_coding			-5.33311	0.244138	-6.07322	-6.07322	-3.97458	-5.24692	-0.833585	-1.78634	-3.88017	10.239	-6.07322	6.75393	883.494	1.83894	7.35189	0.0538766	0	2.96315	2.27739	6.41781	5.60828	3.41636	17.4769	0.06308	-6.51326	-0.93601	-7.25337	-7.25337	-5.15473	-6.42707	-2.01373	-2.96649	-5.06032	9.05883	-7.25337
2.53189e-183	2.41722e-181	ENSOARG00000013747	3:103595452-103598419	protein_coding	ANKRD23	ankyrin repeat domain 23 [Source:HGNC Symbol;Acc:24470]	-0.615055	-0.834869	1.7021	0.638081	-0.164048	-0.170285	-1.13336	0.833525	0.44091	-0.420699	9.72347	6.67399	883.274	-1.44253	-1.43674	0.868229	0	-0.75874	-0.848879	-1.77289	0.0704934	-0.18198	-1.41675	9.01128	-0.533441	-0.753255	1.78371	0.719695	-0.0824344	-0.0886716	-1.05175	0.915139	0.522524	-0.339085	9.80508
3.94957e-183	3.75107e-181	ENSOARG00000016081	4:7564584-7578355	protein_coding			-1.94828	6.30373	6.12652	-0.949554	-1.14024	-2.27044	-1.14522	-0.990804	-0.302961	-0.367635	-4.73684	3.62004	882.377	-1.04627	7.0833	7.02398	0	-0.384341	-1.19365	-0.191026	-0.106113	0.372411	0.957449	-3.34897	-1.93524	6.31678	6.13957	-0.936511	-1.1272	-2.25739	-1.13218	-0.977761	-0.289918	-0.354592	-4.72379
3.50776e-182	3.3142e-180	ENSOARG00000012242	13:64118277-64123903	protein_coding	FAM83C	family with sequence similarity 83, member C [Source:HGNC Symbol;Acc:16121]	4.77933	4.67303	5.86013	-4.50525	-3.97458	-4.44351	-4.43345	-5.07261	-6.07322	-6.07322	-6.07322	3.56895	877.969	9.40072	8.71583	10.4488	0	-0.110448	0.793038	0.552979	-0.0926445	-2.89977	-2.47323	-2.50291	3.60365	3.49734	4.68444	-5.68094	-5.15027	-5.6192	-5.60913	-6.2483	-7.24891	-7.24891	-7.24891
1.22369e-181	1.1502e-179	ENSOARG00000008940	11:8770204-8796025	protein_coding	LPO	lactoperoxidase precursor [Source:RefSeq peptide;Acc:NP_001009722]	-2.51177	11.6597	-6.07322	-5.23916	-2.2523	-3.82922	-3.23644	-5.33913	-2.09846	-0.420302	-6.07322	6.96108	875.447	3.91121	16.587	-1.79219	0	2.62296	3.18741	1.93061	-0.0346003	4.347	4.39368	-1.70731	-4.21796	9.95353	-7.77942	-6.94536	-3.9585	-5.53542	-4.94264	-7.04533	-3.80466	-2.1265	-7.77942
4.26904e-181	3.9921e-179	ENSOARG00000013854	1:60795188-60813195	protein_coding	DNASE2B	deoxyribonuclease II beta [Source:HGNC Symbol;Acc:28875]	-5.31763	-3.42941	-6.07322	-6.07322	-6.07322	-6.07322	-5.51486	-6.07322	0.272787	6.71353	-6.07322	3.22592	872.925	1.75196	3.01324	-0.0225711	0	-0.510278	-0.445826	1.90721	-0.0457876	6.99028	14.0007	0.0715086	-6.04707	-4.15885	-6.80267	-6.80267	-6.80267	-6.80267	-6.2443	-6.80267	-0.456657	5.98408	-6.80267
7.94856e-181	7.395e-179	ENSOARG00000005624	13:61611933-61633734	protein_coding	BPIFB2	BPI fold containing family B, member 2 [Source:HGNC Symbol;Acc:16177]	-1.68855	9.63436	-6.07322	-6.07322	-2.2523	-4.87186	0.920633	-4.88607	-5.00357	-3.8126	-5.04577	4.94991	871.67	5.73037	16.0071	0.0480331	0	4.06846	2.4545	8.30493	3.13936	2.02993	4.1189	3.05061	-2.71216	8.61075	-7.09683	-7.09683	-3.27592	-5.89547	-0.102978	-5.90968	-6.02718	-4.83621	-6.06938
3.76781e-180	3.48762e-178	ENSOARG00000003709	19:14732562-14738919	protein_coding	KLHL40	kelch-like family member 40 [Source:HGNC Symbol;Acc:30372]	-5.3236	-6.07322	-1.96914	-2.84574	-3.97458	-5.24692	-2.61516	-4.88607	-4.94983	-6.07322	6.91561	3.78213	868.529	-2.6362	-4.37911	0.989201	0	-1.45956	-2.39708	0.417731	-1.28427	-2.41834	-4.16406	9.63159	-6.13013	-6.87975	-2.77567	-3.65227	-4.78111	-6.05345	-3.42169	-5.6926	-5.75636	-6.87975	6.10908
9.92664e-180	9.14204e-178	ENSOARG00000003074	24:3422948-3435092	protein_coding	SRL	sarcalumenin [Source:HGNC Symbol;Acc:11295]	1.1064	-0.834869	-1.76772	-0.247634	-1.95094	-1.05077	-0.452837	0.701646	2.53315	-1.97036	9.53604	6.44727	866.574	1.46217	-0.49101	-1.61298	0	-1.62987	-0.801117	-0.297283	1.08225	2.84809	-1.94583	9.74381	-0.213215	-2.15449	-3.08734	-1.56725	-3.27056	-2.37039	-1.77245	-0.617972	1.21353	-3.28998	8.21642
2.88081e-179	2.63978e-177	ENSOARG00000004038	15:74896927-74911872	protein_coding	F2	Ovis aries coagulation factor II (thrombin) (F2), mRNA. [Source:RefSeq mRNA;Acc:NM_001166195]	-3.83152	0.42258	-5.09463	-1.18987	-1.70178	-1.36563	-2.37572	-6.07322	-1.57941	9.89916	-3.69901	6.19546	864.423	-2.67598	0.922146	-3.99671	0	-1.22948	-0.617889	-1.37167	-6.38879	-1.05763	10.8514	-2.07087	-5.23751	-0.983412	-6.50063	-2.59586	-3.10777	-2.77162	-3.78172	-7.47921	-2.98541	8.49317	-5.105
9.60582e-179	8.7581e-177	ENSOARG00000000947	1:123767671-123768300	protein_coding	KRTAP27-1	keratin associated protein 27-1 [Source:HGNC Symbol;Acc:33864]	4.41615	-6.07322	-5.3689	-6.07322	-6.07322	-6.07322	-6.07322	-6.07322	-6.07322	-6.07322	-6.07322	2.9983	861.992	12.8908	-0.945462	1.63757	0	-0.945462	-0.834072	0.371223	-0.0953279	-0.695791	0.212416	0.15684	5.08273	-5.40665	-4.70232	-5.40665	-5.40665	-5.40665	-5.40665	-5.40665	-5.40665	-5.40665	-5.40665
1.2522e-178	1.13602e-176	ENSOARG00000021066	1:100688677-100701982	protein_coding	THEM5	thioesterase superfamily member 5 [Source:HGNC Symbol;Acc:26755]	5.4603	4.43378	5.99528	-3.09385	-3.97458	-5.24692	-4.97693	-4.72765	-2.59509	-6.07322	-3.69415	3.91306	861.457	8.71404	7.29603	9.20738	0	-1.29091	-1.95591	-0.751476	-0.411247	0.626875	-4.16426	-0.128154	2.97127	1.94475	3.50625	-5.58288	-6.46361	-7.73595	-7.46596	-7.21668	-5.08412	-8.56225	-6.18318
2.92691e-178	2.64219e-176	ENSOARG00000001083	JH921995.1:2548-4310	protein_coding			-6.07322	9.72301	-5.3689	-5.33932	-1.70178	-4.17659	-4.18201	-5.34937	-6.07322	-0.988065	-6.07322	5.02463	859.743	-1.73173	14.3929	-0.0355195	0	2.93285	2.15277	1.60401	-0.0033313	-1.86348	4.09041	-1.56833	-6.39746	9.39878	-5.69313	-5.66355	-2.02601	-4.50082	-4.50624	-5.67361	-6.39746	-1.3123	-6.39746
6.96813e-178	6.2593e-176	ENSOARG00000021087	1:101125801-101127138	protein_coding			5.46561	-6.07322	-5.40042	-6.07322	-6.07322	-6.07322	-6.07322	-6.07322	-6.07322	-6.07322	-6.07322	2.71309	857.992	12.7212	-0.774188	1.73344	0	-0.774188	-0.571978	0.12814	-0.013308	-0.301937	-0.114416	0.214929	5.17401	-6.36483	-5.69203	-6.36483	-6.36483	-6.36483	-6.36483	-6.36483	-6.36483	-6.36483	-6.36483
1.25519e-177	1.12198e-175	ENSOARG00000005450	22:15814947-15883884	protein_coding			-1.78832	0.504154	-0.420114	-2.32266	0.61012	-1.88297	-1.98213	-2.405	0.517655	9.31765	-3.70938	6.00566	856.804	0.965385	2.75636	1.95256	0	2.86287	0.228352	0.359653	0.174402	2.76819	12.0445	-0.934509	-3.75917	-1.4667	-2.39097	-4.29351	-1.36073	-3.85382	-3.95298	-4.37586	-1.4532	7.3468	-5.68024
2.01111e-177	1.78891e-175	ENSOARG00000019423	3:138657152-138673409	protein_coding	ENDOU	endonuclease, polyU-specific [Source:HGNC Symbol;Acc:14369]	4.68531	8.07276	8.49761	-2.78385	-3.15367	-2.34288	-2.15978	-2.56025	-4.32945	-2.69327	-2.97118	5.91217	855.852	7.40636	10.1454	10.9494	0	-1.17965	-0.00704083	0.314297	0.136156	-1.4657	-0.13817	0.725478	4.34845	7.7359	8.16076	-3.12071	-3.49052	-2.67973	-2.49664	-2.89711	-4.6663	-3.03013	-3.30804
2.35281e-177	2.0827e-175	ENSOARG00000000235	24:2187374-2191692	protein_coding			-2.8626	10.5759	-5.40042	-4.37281	-3.97458	-6.07322	-4.03277	-4.88607	-4.13819	-0.727745	-6.07322	5.87748	855.535	1.4136	14.1598	-1.32612	0	-0.569825	-3.22032	0.5422	0.0545798	1.02033	3.06326	-2.85754	-2.12563	11.3129	-4.66346	-3.63585	-3.23762	-5.33626	-3.2958	-4.1491	-3.40122	0.00922047	-5.33626
9.29503e-177	8.18816e-175	ENSOARG00000000831	X:124669591-124675649	protein_coding	SERPINA7	Ovis aries serpin peptidase inhibitor, clade A (alpha-1 antiproteinase, antitrypsin), member 7 (SERPINA7), mRNA. [Source:RefSeq mRNA;Acc:NM_001100920]	-6.07322	-3.42941	-6.07322	-6.07322	-6.07322	-6.07322	-6.07322	-6.07322	-6.07322	6.83913	-6.07322	3.10004	852.762	-0.00965841	3.28395	-0.00508172	0	-0.239566	-0.195688	0.0560312	-0.0148733	-0.144015	13.9309	0.0375785	-7.11657	-4.47276	-7.11657	-7.11657	-7.11657	-7.11657	-7.11657	-7.11657	-7.11657	5.79578	-7.11657
9.43806e-177	8.27419e-175	ENSOARG00000025188	AMGL01124015.1:4500-4691	protein_coding	SPRR-like	code Small proline-rich protein signature	-4.54741	4.01386	6.70039	-4.37865	-6.07322	-5.24692	-4.99181	-6.07322	-6.07322	-6.07322	-6.07322	3.72518	852.731	0.759998	7.37331	10.889	0	-3.71311	-1.44149	-0.54278	-3.10337	-3.30698	-3.20365	-2.93242	-2.16659	6.39468	9.08121	-1.99783	-3.6924	-2.8661	-2.61099	-3.6924	-3.6924	-3.6924	-3.6924
3.40165e-176	2.9679e-174	ENSOARG00000008572	14:50711955-50716754	protein_coding	LYPD3	LY6/PLAUR domain containing 3 [Source:HGNC Symbol;Acc:24880]	6.95377	7.30928	8.09612	-0.196703	-6.07322	-4.62635	-3.70189	-4.61528	-2.59114	-1.13268	-6.07322	5.75605	850.142	6.93931	6.78395	8.07072	0	-7.59848	-4.12467	-2.4007	-4.61588	-2.85341	-0.653541	-7.06977	5.97484	6.33035	7.11719	-1.17563	-7.05215	-5.60528	-4.68082	-5.59421	-3.57007	-2.11161	-7.05215
7.75934e-176	6.73769e-174	ENSOARG00000001766	20:30890662-30902808	protein_coding	SLC17A2	solute carrier family 17, member 2 [Source:HGNC Symbol;Acc:10930]	-5.33311	-1.30509	-6.07322	-6.07322	-3.97458	-6.07322	-6.07322	-4.57949	-6.07322	6.98055	-6.07322	3.38745	848.477	1.81286	5.39503	-0.00612659	0	2.57317	-0.281404	0.0816421	2.55926	-0.203661	14.127	0.0585076	-5.94003	-1.912	-6.68014	-6.68014	-4.5815	-6.68014	-6.68014	-5.18641	-6.68014	6.37364	-6.68014
9.07725e-175	7.84472e-173	ENSOARG00000004496	11:40773345-40773641	protein_coding	IIIB3-like	LOC101111893/keratin, high sulfur matrix protein, IIIB3-like	5.8305	-0.196757	-3.59652	-6.07322	-6.07322	-6.07322	-6.07322	-6.07322	-6.07322	-6.07322	-6.07322	3.72871	843.512	13.5182	6.36405	4.39733	0	-0.500082	-0.577003	0.336242	-0.114743	-0.659204	0.50552	-0.0386983	7.58197	1.55471	-1.84506	-4.32176	-4.32176	-4.32176	-4.32176	-4.32176	-4.32176	-4.32176	-4.32176
1.09551e-174	9.42294e-173	ENSOARG00000007280	17:68936119-68958818	protein_coding	SEC14L2	SEC14-like 2 (S. cerevisiae) [Source:HGNC Symbol;Acc:10699]	0.109988	1.03001	-0.372747	-0.813492	4.0984	0.76743	-0.1034	-0.630857	-0.135364	8.05689	-2.04352	4.43915	843.132	0.602356	0.970597	0.199983	0	4.04361	0.972792	0.441838	-0.119157	0.0913201	8.60371	-1.5392	-0.373376	0.546649	-0.856112	-1.29686	3.61503	0.284065	-0.586765	-1.11422	-0.618729	7.57352	-2.52688
6.26376e-174	5.36242e-172	ENSOARG00000014567	9:50347631-50347933	protein_coding			-1.09639	1.03001	-0.803715	0.103791	-2.2523	0.604279	1.02173	-0.462961	-1.47936	-4.54485	8.06866	4.94052	839.611	-1.27437	1.04768	-0.964065	0	-2.28135	0.647045	0.962854	0.0592137	-1.45852	-4.46102	7.96154	0.626217	2.75262	0.918895	1.8264	-0.529695	2.32689	2.74434	1.25965	0.24325	-2.82224	9.79127
1.07396e-173	9.15127e-172	ENSOARG00000000042	22:50692314-50706424	protein_coding	CYP2E1	Ovis aries cytochrome P450, family 2, subfamily E, polypeptide 1 (CYP2E1), mRNA. [Source:RefSeq mRNA;Acc:NM_001245972]	-3.26744	3.7385	-4.69425	-4.20592	-2.63371	-2.42341	-5.51486	-4.30869	-3.46047	12.6099	-6.07322	9.2583	838.523	0.28316	6.97136	-1.05288	0	0.531888	1.12888	-1.68344	-0.418545	-0.0393003	16.3648	-3.38688	-5.68157	1.32437	-7.10839	-6.62005	-5.04784	-4.83754	-7.929	-6.72283	-5.87461	10.1957	-8.48736
1.51218e-173	1.28254e-171	Addition41	1:101953161-101953481		SPRR2-like4		-4.73243	2.73166	9.05248	-3.24413	-6.07322	-6.07322	-3.49988	-5.33913	-6.07322	-6.07322	-6.07322	6.00205	837.832	-1.50762	4.22514	11.6407	0	-5.57813	-5.32392	-0.187731	-2.97625	-4.97728	-5.06351	-4.5958	-3.08858	4.37552	10.6963	-1.60028	-4.42937	-4.42937	-1.85603	-3.69528	-4.42937	-4.42937	-4.42937
9.49231e-172	8.01353e-170	ENSOARG00000004000	2:139245027-139331632	protein_coding	ABCB11	ATP-binding cassette, sub-family B (MDR/TAP), member 11 [Source:HGNC Symbol;Acc:42]	-3.54557	0.790911	-3.85101	-1.62859	-3.97458	-1.88568	-2.29253	-1.08878	-0.616249	10.0642	2.01197	6.43865	829.473	-1.71105	2.00973	-2.13753	0	-2.92864	-0.736483	-1.20727	0.124311	0.582706	11.3962	3.34435	-5.55169	-1.21521	-5.85713	-3.63471	-5.9807	-3.89179	-4.29864	-3.09489	-2.62237	8.0581	0.00585293
6.8583e-171	5.76318e-169	ENSOARG00000009994	14:52155522-52163902	protein_coding	RTN2	reticulon 2 [Source:HGNC Symbol;Acc:10468]	0.282007	-0.0732743	0.458459	-0.176687	-0.859345	-0.481728	-0.37676	-0.577107	0.241135	-1.49897	6.25336	3.10479	825.479	0.475932	-0.105021	0.653878	0	-0.899344	-0.515395	-0.241697	-0.431063	0.279947	-1.35043	6.40238	-0.231989	-0.58727	-0.0555366	-0.690683	-1.37334	-0.995724	-0.890756	-1.0911	-0.272861	-2.01297	5.73936
2.80122e-170	2.34313e-168	ENSOARG00000003776	1:234199476-234215777	protein_coding			-6.07322	-2.00718	-6.07322	-5.38472	6.54969	3.51669	2.54685	-1.25414	-6.07322	7.17523	-6.07322	4.08478	822.637	-1.76913	2.94009	-1.76986	0	11.5406	8.88902	7.94115	4.261	-1.795	12.3713	-1.70419	-6.38937	-2.32333	-6.38937	-5.70086	6.23354	3.20055	2.2307	-1.57029	-6.38937	6.85908	-6.38937
3.08882e-170	2.5719e-168	ENSOARG00000017938	3:162903225-162903989	protein_coding			-3.89411	-0.331807	-4.41975	-3.60671	-6.07322	-4.87186	-4.71854	-4.30869	-4.94983	8.32771	-6.07322	5.26012	822.44	-0.124831	1.47789	-1.45411	0	-5.24998	-2.10363	-1.74349	-1.23788	-2.37917	11.1414	-4.10418	-3.50765	0.0546612	-4.03328	-3.22024	-5.68675	-4.48539	-4.33207	-3.92222	-4.56336	8.71418	-5.68675
3.3259e-170	2.75671e-168	ENSOARG00000016910	4:105627309-105643585	protein_coding	TRPV6	transient receptor potential cation channel, subfamily V, member 6 [Source:HGNC Symbol;Acc:14006]	6.38852	-0.480817	-5.13043	-3.82315	1.457	-6.07322	-6.07322	-6.07322	-6.07322	-4.08955	-6.07322	3.3932	822.29	9.57306	2.46194	-1.55938	0	4.41088	-4.06253	-3.96268	-3.97122	-4.0004	-0.180081	-3.93728	4.96145	-1.90789	-6.5575	-5.25022	0.029929	-7.50029	-7.50029	-7.50029	-7.50029	-5.51662	-7.50029
7.19455e-170	5.93632e-168	ENSOARG00000015096	18:58046610-58076899	protein_coding	SERPINA12	serpin peptidase inhibitor, clade A (alpha-1 antiproteinase, antitrypsin), member 12 [Source:HGNC Symbol;Acc:18359]	5.49635	-0.480817	-5.36705	-6.07322	-6.07322	-6.07322	-6.07322	-6.07322	-6.07322	-6.07322	-6.07322	2.7083	820.732	12.8541	6.62218	1.75335	0	0.044808	0.249837	-0.149698	0.0778419	0.524549	-0.303911	0.0906495	5.12563	-0.851539	-5.73778	-6.44394	-6.44394	-6.44394	-6.44394	-6.44394	-6.44394	-6.44394	-6.44394
1.23863e-169	1.0174e-167	ENSOARG00000011552	7:5489473-5490813	protein_coding	DRD1	Dopamine D1 receptor [Source:UniProtKB/TrEMBL;Acc:F2WVH2]	-1.70645	-6.07322	-2.96076	-3.50738	-6.07322	-4.44351	-5.26342	-3.88596	-1.58184	-4.23098	6.04001	2.82433	819.635	1.07352	-4.7426	-0.0145843	0	-4.7426	-0.830222	-1.84689	-0.648283	1.14482	-0.614523	8.88039	-2.12976	-6.49653	-3.38406	-3.93069	-6.49653	-4.86682	-5.68673	-4.30926	-2.00515	-4.65429	5.61671
1.81534e-169	1.48443e-167	ENSOARG00000012292	11:39819278-39830096	protein_coding	GSDMB	gasdermin B [Source:HGNC Symbol;Acc:23690]	-0.0818276	-2.54971	-0.705067	-0.729801	6.50004	6.02262	6.1575	5.70804	-0.939555	2.00574	-3.07599	4.57611	818.863	0.494851	-2.24733	-0.161317	0	6.86643	6.53825	6.66257	6.19685	-0.412075	2.41076	-1.38347	-0.407214	-2.8751	-1.03045	-1.05519	6.17465	5.69724	5.83211	5.38265	-1.26494	1.68036	-3.40138
7.17569e-169	5.84146e-167	ENSOARG00000008731	25:30747793-30759447	protein_coding	DUSP13	dual specificity phosphatase 13 [Source:HGNC Symbol;Acc:19681]	-2.81336	-3.42941	-1.45054	-4.26175	-3.97458	-6.07322	-4.03277	-6.07322	-5.00357	-4.67695	7.42725	4.25334	816.087	1.20197	1.09965	3.28386	0	0.495692	-2.88174	0.641247	-3.09834	-0.980106	0.310931	11.6289	-3.61079	-4.22684	-2.24797	-5.05918	-4.77201	-6.87065	-4.83019	-6.87065	-5.801	-5.47438	6.62982
1.48105e-168	1.20031e-166	ENSOARG00000009675	4:68858042-68863494	protein_coding	HOXA10	homeobox A10 [Source:HGNC Symbol;Acc:5100]	-2.31912	-6.07322	-5.3689	-5.23916	-6.07322	4.62043	4.77652	4.45747	-4.59047	-6.07322	5.77912	3.79172	814.623	4.16583	-2.00594	-0.121381	0	-2.00594	10.0234	10.0962	9.78011	1.26099	-1.96931	11.1141	-4.40727	-8.16136	-7.45704	-7.3273	-8.16136	2.53229	2.68838	2.36933	-6.67861	-8.16136	3.69097
6.60187e-167	5.32677e-165	ENSOARG00000008060	X:78227716-78291337	protein_coding	ZNF185	zinc finger protein 185 (LIM domain) [Source:HGNC Symbol;Acc:12976]	4.79159	6.29373	6.08072	-1.43491	-1.95094	-1.26224	-1.74961	-0.665387	-6.07322	-1.19913	-2.15871	3.88984	806.953	6.13865	7.17041	7.44567	0	-1.11615	0.0994945	-0.2723	0.893873	-6.00465	0.389992	-0.689125	3.4081	4.91023	4.69722	-2.81841	-3.33444	-2.64573	-3.13311	-2.04888	-7.45672	-2.58263	-3.54221
2.78667e-166	2.23854e-164	ENSOARG00000015327	11:40583329-40587120	protein_coding	KRT10	keratin 10 [Source:HGNC Symbol;Acc:6413]	11.0713	7.59237	4.41743	1.71997	0.783602	0.231473	0.825589	0.601081	0.000974411	0.744811	2.58061	8.28928	804.044	9.43172	5.39548	2.62941	0	-1.41947	-1.78613	-1.05754	-1.22675	-1.90808	-1.06883	0.729932	10.362	6.88308	3.70814	1.01068	0.0743114	-0.477818	0.116298	-0.10821	-0.708316	0.0355205	1.87132
3.00592e-166	2.40408e-164	ENSOARG00000017073	10:36253000-36253785	protein_coding	GJB6	gap junction protein, beta 6, 30kDa [Source:HGNC Symbol;Acc:4288]	4.90426	5.42545	3.98405	-5.38472	-6.07322	-6.07322	-6.07322	-4.58974	-6.07322	-3.14857	-6.07322	3.08538	803.891	10.2901	10.3379	9.31593	0	-2.16055	-2.22727	-1.63545	0.615964	-2.2999	2.32807	-1.87265	5.25166	5.77285	4.33145	-5.03732	-5.72582	-5.72582	-5.72582	-4.24234	-5.72582	-2.80117	-5.72582
3.01885e-165	2.40388e-163	ENSOARG00000013777	1:266451502-266453249	protein_coding			-1.31209	2.20634	7.54039	0.806727	5.52493	1.92462	1.33459	1.7179	-0.963546	6.32012	2.06462	5.04736	799.231	-2.29621	0.831592	6.55418	0	4.15227	0.669755	0.356174	0.736833	-2.31354	5.4848	1.05174	-1.1211	2.39733	7.73139	0.997725	5.71592	2.11562	1.52559	1.9089	-0.772549	6.51111	2.25561
5.9111e-164	4.68647e-162	ENSOARG00000019774	1:182662813-182689805	protein_coding	PLA1A	phospholipase A1 member A [Source:HGNC Symbol;Acc:17661]	-3.66683	-2.54971	-3.71994	-1.70372	-0.737057	-1.48636	-1.43942	-4.02043	-4.59047	7.74566	-4.23392	4.03368	793.222	-1.82729	-1.69233	-2.49923	0	0.166484	0.0684855	-0.0579828	-2.2878	-2.62727	8.68767	-0.608424	-4.12206	-3.00494	-4.17517	-2.15895	-1.19229	-1.94159	-1.89465	-4.47565	-5.0457	7.29043	-4.68915
1.43218e-163	1.13056e-161	ENSOARG00000015235	11:40565391-40573023	protein_coding	KRT28	keratin 28 [Source:HGNC Symbol;Acc:30842]	7.00003	-6.07322	-5.3689	-5.38472	-6.07322	-6.07322	-6.07322	-6.07322	-6.07322	-4.67695	-5.04577	5.22386	791.434	12.9224	-2.11266	-0.421582	0	-2.11266	-2.32943	-1.63793	-2.04712	-2.538	1.78412	0.942167	6.51977	-6.55349	-5.84916	-5.86498	-6.55349	-6.55349	-6.55349	-6.55349	-6.55349	-5.15721	-5.52603
2.405e-163	1.89031e-161	ENSOARG00000017624	5:48946614-48963445	protein_coding	SLC4A9	solute carrier family 4, sodium bicarbonate cotransporter, member 9 [Source:HGNC Symbol;Acc:11035]	3.15021	3.42956	6.49581	-0.841969	-6.07322	-2.88473	-3.49089	-2.43847	-2.13886	-2.69327	-4.73684	3.67392	790.387	3.59757	3.41959	6.90375	0	-7.08219	-2.87387	-2.17333	-2.01818	-2.07313	-2.26331	-3.80393	0.546853	0.826197	3.89245	-3.44533	-8.67658	-5.48808	-6.09425	-5.04183	-4.74222	-5.29663	-7.3402
1.33791e-162	1.04707e-160	ENSOARG00000014621	1:62895304-62937803	protein_coding	CLCA2	chloride channel accessory 2 [Source:HGNC Symbol;Acc:2016]	6.64037	7.29789	10.1428	-2.6213	-3.15367	-5.24692	-2.85223	-5.33913	-3.98716	-0.905956	-6.07322	7.2705	786.919	8.35588	7.91555	12.0568	0	-2.63458	-4.06969	0.19093	-3.80498	-1.70086	0.224923	-5.40117	5.02261	5.68012	8.525	-4.23907	-4.77144	-6.86469	-4.47	-6.9569	-5.60493	-2.52372	-7.69099
4.86477e-162	3.79098e-160	ENSOARG00000014749	8:59987597-60013962	protein_coding	ALDH8A1	aldehyde dehydrogenase 8 family, member A1 [Source:HGNC Symbol;Acc:15471]	-1.564	-1.61384	-3.14032	-1.99463	2.03936	-1.1662	-2.28525	-3.85738	-1.14331	7.83646	-1.09536	4.15978	784.311	-0.0191495	-0.80049	-1.53924	0	2.88327	-0.00846405	-0.77645	-1.92952	0.422346	9.57456	0.503109	-2.11392	-2.16376	-3.69024	-2.54455	1.48944	-1.71611	-2.83516	-4.4073	-1.69323	7.28655	-1.64528
7.84044e-162	6.08385e-160	ENSOARG00000000936	4:87961383-87970896	protein_coding	LMOD2	leiomodin 2 (cardiac) [Source:HGNC Symbol;Acc:6648]	-1.51498	-3.42941	-5.36705	-4.55065	-6.07322	-6.07322	-4.15498	-4.02043	-5.00357	-6.07322	7.63427	4.81131	783.347	3.59613	0.518743	-0.9965	0	-3.00477	-2.92321	0.821719	0.864309	-0.661739	-2.61856	12.3448	-2.81481	-4.72924	-6.66689	-5.85048	-7.37305	-7.37305	-5.45482	-5.32026	-6.3034	-7.37305	6.33444
2.70314e-161	2.08863e-159	ENSOARG00000015608	11:40738458-40745355	protein_coding	KRT39	keratin 39 [Source:HGNC Symbol;Acc:32971]	4.33099	-2.54971	-5.3689	-6.07322	-3.97458	-6.07322	-6.07322	-6.07322	-6.07322	-6.07322	-6.07322	2.84191	780.846	12.71	3.90042	1.54384	0	2.36059	-0.641633	0.392662	-0.130323	-0.730188	0.590737	-0.0433832	3.76637	-3.11433	-5.93352	-6.63784	-4.5392	-6.63784	-6.63784	-6.63784	-6.63784	-6.63784	-6.63784
7.15916e-161	5.50832e-159	ENSOARG00000007655	25:29294465-29297491	protein_coding	MSS51	MSS51 mitochondrial translational activator [Source:HGNC Symbol;Acc:21000]	4.33553	4.14044	3.51871	4.13198	4.0984	4.1333	3.67596	4.14152	4.723	3.62183	9.15586	6.31918	778.878	0.188546	0.0800135	-0.601908	0	0.0379554	0.031958	-0.446358	0.00949303	0.617063	-0.529432	5.01326	3.86772	3.67264	3.05091	3.66418	3.6306	3.6655	3.20816	3.67372	4.25519	3.15403	8.68806
1.84057e-160	1.4102e-158	ENSOARG00000008294	19:60380994-60394319	protein_coding	UROC1	urocanate hydratase 1 [Source:HGNC Symbol;Acc:26444]	-6.07322	-0.331807	-3.42171	-4.27849	-6.07322	-4.87186	-4.5707	-4.57949	0.988973	6.7662	-6.07322	3.0565	776.97	-3.04298	3.65024	0.723249	0	-3.07763	-0.10222	-0.593791	-0.486611	5.19846	10.6965	-3.03822	-6.79918	-1.05777	-4.14767	-5.00445	-6.79918	-5.59782	-5.29666	-5.30545	0.263014	6.04024	-6.79918
2.31839e-160	1.76886e-158	ENSOARG00000004851	6:101807941-101824456	protein_coding	HSD17B13	hydroxysteroid (17-beta) dehydrogenase 13 [Source:HGNC Symbol;Acc:18685]	1.5979	-1.30509	7.81593	-3.26659	-1.70178	-3.31308	-4.49857	-4.29845	-2.43926	7.75039	-6.07322	5.58005	776.503	5.25331	1.83508	11.235	0	1.42983	-0.387203	0.2709	-0.698081	0.802682	11.1958	-3.7353	1.74511	-1.15789	7.96313	-3.11939	-1.55458	-3.16587	-4.35137	-4.15125	-2.29206	7.89759	-5.92602
1.2182e-159	9.25576e-158	ENSOARG00000002904	JH924887.1:22573-24798	protein_coding	MUC6	mucin 6, oligomeric mucus/gel-forming [Source:HGNC Symbol;Acc:7517]	-6.07322	-6.07322	-6.07322	0.555362	8.65502	-4.87186	-6.07322	-3.93532	-6.07322	-6.07322	-6.07322	4.05539	773.151	-9.30773	-10.4754	-9.28061	0	5.25282	-7.33412	-8.94128	-5.37625	-9.9426	-9.32902	-8.94707	-6.59427	-6.59427	-6.59427	0.0343115	8.13397	-5.39291	-6.59427	-4.45638	-6.59427	-6.59427	-6.59427
4.31276e-159	3.26321e-157	ENSOARG00000016285	2:118144443-118149433	protein_coding	GDF-8	Ovis aries myostatin (MSTN), mRNA. [Source:RefSeq mRNA;Acc:NM_001009428]	-4.28743	-6.07322	-6.07322	-6.07322	-6.07322	-2.73899	-2.84074	-2.56767	0.847152	-2.7026	5.54343	2.49811	770.596	3.23064	0.176078	0.0590253	0	0.176078	4.72797	4.24059	4.7987	8.46107	4.12306	12.8507	-4.4612	-6.24699	-6.24699	-6.24699	-6.24699	-2.91275	-3.01451	-2.74144	0.673385	-2.87637	5.36967
4.91842e-159	3.70609e-157	ENSOARG00000002636	14:34002894-34015220	protein_coding	CES3	carboxylesterase 3 [Source:HGNC Symbol;Acc:1865]	2.78801	-2.54971	-3.81312	-2.15321	4.14288	-6.07322	-6.07322	-6.07322	-6.07322	7.55865	-6.07322	4.02601	770.33	4.3399	-2.0073	-1.81014	0	4.74881	-6.26554	-5.5777	-5.71478	-5.99664	8.97517	-5.48945	2.0344	-3.30331	-4.56673	-2.90681	3.38927	-6.82683	-6.82683	-6.82683	-6.82683	6.80504	-6.82683
8.57132e-159	6.43202e-157	ENSOARG00000000297	1:101633418-101685524	protein_coding			5.37456	-2.54971	-6.07322	-6.07322	-6.07322	-6.07322	-6.07322	-5.31358	-6.07322	-6.07322	-5.04577	2.5219	769.208	12.6456	4.91231	0.0522871	0	0.452932	0.50878	-0.162326	1.89845	0.574642	-0.220839	2.77956	4.36378	-3.56049	-7.084	-7.084	-7.084	-7.084	-7.084	-6.32436	-7.084	-7.084	-6.05655
8.639e-159	6.45624e-157	ENSOARG00000008845	5:60231747-60296132	protein_coding	FAT2	FAT atypical cadherin 2 [Source:HGNC Symbol;Acc:3596]	8.73177	7.37513	7.68346	-2.64138	-1.70178	-3.06756	-2.14559	-2.56895	-1.86301	-4.67695	-4.00308	6.35989	769.192	10.1826	8.19548	9.06382	0	-0.916647	-2.29611	-0.543202	-0.712551	-0.924974	-2.68502	-1.98056	5.00668	3.65004	3.95837	-6.36647	-5.42687	-6.79265	-5.87068	-6.29404	-5.5881	-8.40204	-7.72817
2.84685e-157	2.11887e-155	ENSOARG00000019210	2:211162164-211302661	protein_coding	CPS1	carbamoyl-phosphate synthase 1, mitochondrial [Source:HGNC Symbol;Acc:2323]	-4.57752	2.82985	-6.07322	-5.23916	7.51384	-4.07286	-1.84699	-2.95355	-4.53012	12.2005	-4.00308	8.66425	762.128	0.714744	7.76643	-1.84314	0	12.4519	2.45918	3.58028	3.15152	1.44914	17.3057	1.93428	-6.75416	0.653212	-8.24986	-7.4158	5.3372	-6.24951	-4.02363	-5.13019	-6.70677	10.0239	-6.17972
8.61112e-157	6.38308e-155	ENSOARG00000013964	14:55623623-55647351	protein_coding	MYBPC2	myosin binding protein C, fast type [Source:HGNC Symbol;Acc:7550]	0.412485	-1.05091	0.105775	1.04898	2.76392	1.72205	2.24838	1.34085	2.09054	0.310236	12.7195	9.60804	759.891	-0.723245	-2.27988	-1.24523	0	1.55573	0.393125	0.818862	0.0454154	0.867781	-0.959721	11.2864	-1.36278	-2.82617	-1.66949	-0.726277	0.988656	-0.0532098	0.473118	-0.434414	0.315281	-1.46503	10.9442
1.04923e-156	7.746e-155	ENSOARG00000013817	X:54280646-54293742	protein_coding	RGN	Ovis aries regucalcin (senescence marker protein-30) (RGN), mRNA. [Source:RefSeq mRNA;Acc:NM_001130935]	0.227031	2.43154	-1.06277	-0.234936	0.121087	0.561894	0.938436	1.24858	0.413058	10.4624	-0.52165	7.1131	759.491	0.514203	2.51422	-0.385747	0	0.195868	0.691526	1.21415	1.49986	0.55458	10.9592	0.17588	0.379035	2.58355	-0.910767	-0.0829326	0.27309	0.713897	1.09044	1.40059	0.565061	10.6144	-0.369647
1.08592e-156	7.98457e-155	ENSOARG00000013832	4:32939153-32982289	protein_coding			-1.28152	-0.647009	0.850587	-2.31574	0.938444	-0.628227	-0.249755	-0.721732	-2.43926	7.54005	-2.04462	3.88439	759.422	1.02917	1.67195	3.2442	0	3.26867	1.6329	2.02805	1.56517	-0.196225	9.90476	0.390339	-2.60978	-1.97527	-0.477675	-3.644	-0.389818	-1.95649	-1.57802	-2.04999	-3.76752	6.21179	-3.37288
5.83212e-156	4.27103e-154	ENSOARG00000001315	21:40916973-40939822	protein_coding			-6.07322	-3.42941	-6.07322	-6.07322	-6.07322	-6.07322	-6.07322	-6.07322	-6.07322	6.42958	-6.07322	2.82682	756.024	-0.0227036	2.99082	-0.0113071	0	-0.532696	-0.440259	0.139644	-0.0354213	-0.327581	13.6313	0.0937572	-6.82683	-4.18302	-6.82683	-6.82683	-6.82683	-6.82683	-6.82683	-6.82683	-6.82683	5.67598	-6.82683
7.17317e-156	5.23211e-154	ENSOARG00000018687	AMGL01121006.1:1156-1317	protein_coding			-6.07322	-6.07322	-6.07322	1.86717	-6.07322	-4.44351	-6.07322	-6.07322	-6.07322	-6.07322	-6.07322	3.90273	755.606	-13.6855	-15.3481	-13.6563	0	-15.3481	-11.1317	-13.4338	-13.7703	-14.39	-14.1741	-13.0165	-3.44729	-3.44729	-3.44729	4.4931	-3.44729	-1.81758	-3.44729	-3.44729	-3.44729	-3.44729	-3.44729
4.02806e-155	2.92636e-153	ENSOARG00000001063	1:123972603-123973280	protein_coding	CLDN17	claudin 17 [Source:HGNC Symbol;Acc:2038]	-1.67229	6.66687	3.90114	-6.07322	-6.07322	-6.07322	-5.2769	-6.07322	-5.00357	-4.67695	-6.07322	2.8039	752.118	5.81292	13.7314	11.3456	0	-0.00857268	-0.33271	2.06337	-0.131349	1.60789	3.81874	-0.182201	-1.11165	7.22752	4.46178	-5.51258	-5.51258	-5.51258	-4.71625	-5.51258	-4.44293	-4.11631	-5.51258
5.0177e-155	3.63087e-153	ENSOARG00000016956	3:133668845-133676261	protein_coding	KRT71	keratin 71 [Source:HGNC Symbol;Acc:28927]	9.64068	0.336116	-5.3689	-6.07322	-6.07322	-6.07322	-6.07322	-5.31358	-5.00357	-6.07322	-2.1778	7.90089	751.674	17.5467	6.9664	1.54355	0	-0.434431	-0.508288	0.274991	1.65099	1.62149	0.418302	5.42322	9.16664	-0.13793	-5.84294	-6.54727	-6.54727	-6.54727	-6.54727	-5.78763	-5.47761	-6.54727	-2.65184
5.60733e-155	4.04149e-153	ENSOARG00000008741	25:30757780-30760364	protein_coding			-4.57752	-6.07322	-4.66273	-6.07322	-3.97458	-6.07322	-5.09915	-6.07322	-6.07322	-6.07322	5.54587	2.18821	751.449	2.57483	-0.0657272	2.39185	0	2.85383	-0.0821431	2.95793	-0.0150554	-0.100413	0.0585973	12.6332	-3.71239	-5.2081	-3.79761	-5.2081	-3.10946	-5.2081	-4.23403	-5.2081	-5.2081	-5.2081	6.41099
9.85155e-155	7.07256e-153	ENSOARG00000014983	6:63224184-63253589	protein_coding	YIPF7	Yip1 domain family, member 7 [Source:HGNC Symbol;Acc:26825]	-0.013875	-0.0732743	-0.0570375	-0.850381	-1.30427	-0.494394	-1.03977	-0.626887	-0.744388	0.0723645	6.49459	3.33224	750.31	0.79961	1.01738	0.736901	0	-0.229005	0.145591	-0.178618	0.498041	-0.10132	1.25008	7.34752	0.23252	0.173121	0.189358	-0.603985	-1.05788	-0.247999	-0.793377	-0.380491	-0.497993	0.31876	6.74099
5.59385e-154	4.00015e-152	ENSOARG00000018072	12:77891233-77911837	protein_coding	PKP1	plakophilin 1 (ectodermal dysplasia/skin fragility syndrome) [Source:HGNC Symbol;Acc:9023]	6.74776	6.04899	6.82805	-0.718771	-3.15367	-1.71944	-1.4116	-0.744674	-3.88017	-3.75959	-5.04577	4.85245	746.799	7.25279	6.28476	7.32426	0	-3.01637	-0.641432	-1.0132	0.183995	-3.51276	-2.067	-3.78267	6.66097	5.9622	6.74127	-0.805555	-3.24045	-1.80622	-1.49838	-0.831458	-3.96696	-3.84638	-5.13255
1.06875e-153	7.61276e-152	ENSOARG00000001679	JH921815.1:9611-13219	protein_coding			-4.87903	12.124	-6.07322	-6.07322	-1.70178	-4.17659	-4.30282	-3.93532	-3.09265	0.485536	-6.07322	7.42508	745.491	3.26025	18.4816	0.112527	0	4.62058	4.02455	3.28638	3.97393	6.0995	7.17767	0.327204	-5.92098	11.0821	-7.11517	-7.11517	-2.74372	-5.21853	-5.34477	-4.97727	-4.1346	-0.556408	-7.11517
2.8314e-153	2.00897e-151	ENSOARG00000009639	2:37997301-38020786	protein_coding			-1.45972	-1.05091	-1.52281	-4.08253	-3.97458	-2.73899	-3.73443	-2.50549	-0.540029	7.74967	-4.00308	4.03545	743.521	2.47216	2.47583	2.12523	0	-0.604564	0.76175	0.515376	1.26461	2.96817	11.5432	0.218342	-1.86025	-1.45144	-1.92335	-4.48307	-4.37512	-3.13952	-4.13497	-2.90603	-0.940567	7.34913	-4.40362
1.07478e-152	7.59639e-151	ENSOARG00000013899	11:29149877-29169247	protein_coding	MYH3	myosin, heavy chain 3, skeletal muscle, embryonic [Source:HGNC Symbol;Acc:7573]	-4.57752	-1.61384	-2.87653	-5.33932	-3.15367	-2.75333	-2.59529	-2.89766	-6.07322	-3.14857	6.84339	3.66222	740.824	0.776158	3.77252	3.50038	0	2.16722	2.82023	2.73838	2.56267	-1.73416	2.01406	12.2069	-7.11332	-4.14965	-5.41234	-7.87512	-5.68947	-5.28913	-5.13109	-5.43347	-8.60903	-5.68438	4.30759
1.55162e-152	1.09242e-150	ENSOARG00000018613	11:27256343-27268302	protein_coding	ALOX15B	arachidonate 15-lipoxygenase, type B [Source:HGNC Symbol;Acc:434]	5.75406	6.55528	6.76988	-0.971988	-1.95094	-3.06756	-2.14647	-4.33726	1.51771	-0.623796	-3.69901	4.67188	740.082	6.7338	6.72521	7.538	0	-1.82292	-2.89556	-1.40735	-3.30468	2.02405	0.152088	-1.99405	3.51987	4.32109	4.53569	-3.20618	-4.18513	-5.30176	-4.38067	-6.57146	-0.716486	-2.85799	-5.9332
1.61782e-152	1.13465e-150	ENSOARG00000017991	6:9181654-9182209	pseudogene			4.06281	6.18507	9.60105	3.16439	2.52818	3.9882	4.16691	4.15607	4.08618	4.56375	4.77418	6.84217	739.997	0.90043	2.78665	6.47633	0	-0.871947	0.727142	0.995307	1.04415	0.80536	1.4197	1.60758	4.93584	7.0581	10.4741	4.03742	3.40121	4.86123	5.03993	5.0291	4.95921	5.43677	5.64721
2.82545e-152	1.97403e-150	ENSOARG00000019642	3:185005628-185058440	protein_coding	FAR2	fatty acyl CoA reductase 2 [Source:HGNC Symbol;Acc:25531]	7.34099	-3.42941	-3.55055	-0.218325	-0.0873097	-1.78669	-1.324	-1.058	0.635152	-1.49897	-3.20917	4.63426	738.87	7.67643	-3.73386	-2.9044	0	-0.282891	-1.07466	-1.06916	-0.565351	1.01806	-1.77947	-2.0125	6.67287	-4.09753	-4.21867	-0.886444	-0.755429	-2.45481	-1.99212	-1.72612	-0.032967	-2.16709	-3.87729
4.23775e-152	2.94945e-150	ENSOARG00000015170	5:78568574-78593686	protein_coding	CKMT2	creatine kinase, mitochondrial 2 (sarcomeric) [Source:HGNC Symbol;Acc:1996]	0.283868	0.145894	0.893884	0.615219	0.0549106	1.16592	0.5592	1.24955	-0.494411	3.6382	8.91263	6.03549	738.05	-0.349776	-0.69086	0.191293	0	-0.782478	0.299915	-0.0916778	0.882698	-1.27803	3.11875	8.34368	-0.0677599	-0.205734	0.542256	0.263591	-0.296718	0.814296	0.207572	0.897923	-0.846039	3.28658	8.561
8.16659e-152	5.66228e-150	ENSOARG00000010541	11:39248095-39265315	protein_coding	CACNB1	calcium channel, voltage-dependent, beta 1 subunit [Source:HGNC Symbol;Acc:1401]	2.12329	2.34563	1.43981	2.16137	1.50736	1.77249	1.21707	1.42321	2.22302	1.50102	6.95629	4.04216	736.724	-0.0426421	0.323179	-0.699199	0	-0.516761	-0.274236	-0.951478	-0.693097	0.160569	-0.683055	4.81858	1.11682	1.33915	0.433333	1.15489	0.500878	0.766017	0.210589	0.416737	1.21654	0.494541	5.94981
2.18019e-150	1.5059e-148	ENSOARG00000014917	18:57990925-58000135	protein_coding	SERPINA11	serpin peptidase inhibitor, clade A (alpha-1 antiproteinase, antitrypsin), member 11 [Source:HGNC Symbol;Acc:19193]	-6.07322	-3.42941	-6.07322	-6.07322	-3.97458	-3.64742	-1.56688	-2.65517	-6.07322	6.73059	-6.07322	2.98808	730.083	0.099412	3.31908	0.0860994	0	2.71511	5.40197	5.59242	5.58752	0.435648	13.4809	0.155318	-6.42032	-3.77651	-6.42032	-6.42032	-4.32168	-3.99452	-1.91398	-3.00227	-6.42032	6.38349	-6.42032
1.0311e-148	7.09513e-147	ENSOARG00000016218	11:41065181-41071332	protein_coding	KRT33B/LOC100526782	Ovis aries keratin 33B (LOC100526782), mRNA. [Source:RefSeq mRNA;Acc:NM_001199070]	7.95955	0.145894	-0.945512	-6.07322	-6.07322	-6.07322	-6.07322	-5.31358	-6.07322	-6.07322	-6.07322	6.2669	722.284	15.9122	6.64619	6.49331	0	-0.563215	-0.578498	0.286252	1.67503	-0.595032	0.349688	0.00657109	7.66442	-0.149241	-1.24065	-6.36836	-6.36836	-6.36836	-6.36836	-5.60872	-6.36836	-6.36836	-6.36836
1.04817e-148	7.18551e-147	ENSOARG00000002419	15:26965551-26968105	protein_coding	APOA4	apolipoprotein A-IV [Source:HGNC Symbol;Acc:602]	-6.07322	-6.07322	-5.36705	-6.07322	8.6777	-6.07322	-6.07322	-5.07261	-6.07322	-1.48624	-6.07322	4.02586	722.251	0.0378983	-0.978702	1.67601	0	14.7722	-0.713547	0.146077	2.48861	-0.332819	5.5296	0.328629	-6.22768	-6.22768	-5.52151	-6.22768	8.52325	-6.22768	-6.22768	-5.22707	-6.22768	-1.6407	-6.22768
5.59932e-148	3.8241e-146	ENSOARG00000006534	23:26023321-26063151	protein_coding	DSG4	Desmoglein 4 [Source:UniProtKB/TrEMBL;Acc:D7R495]	6.05641	-6.07322	-5.09255	-5.23916	-6.07322	-6.07322	-5.09915	-5.33913	-6.07322	-6.07322	-5.04577	4.62416	718.862	12.4786	-2.08539	0.566942	0	-2.08539	-2.18908	1.5644	0.0151075	-2.29662	-1.37563	1.09791	4.41347	-7.71615	-6.73548	-6.88209	-7.71615	-7.71615	-6.74208	-6.98207	-7.71615	-7.71615	-6.6887
1.0747e-147	7.31239e-146	ENSOARG00000001237	JH922828.1:1977-3331	protein_coding			4.87453	4.22708	4.86721	-2.95613	-3.97458	-5.24692	-4.5707	-3.41254	-2.85236	-6.07322	-5.04577	2.99503	717.544	7.75796	6.92538	7.7366	0	-1.45479	-2.22831	-1.66549	0.403807	0.264224	-4.22838	-1.35966	5.74228	5.09483	5.73496	-2.08838	-3.10683	-4.37917	-3.70295	-2.54479	-1.98461	-5.20547	-4.17802
4.06239e-147	2.75382e-145	ENSOARG00000013800	18:22140267-22165214	protein_coding	FSD2	fibronectin type III and SPRY domain containing 2 [Source:HGNC Symbol;Acc:18024]	2.13465	2.38923	1.47767	2.246	1.96923	1.42122	1.32678	1.86817	2.38942	2.65484	8.5847	5.59039	714.854	-0.290482	-0.365326	-1.00075	0	-0.786016	-1.20746	-1.16226	-0.520424	-0.231858	0.283119	6.11096	-0.466572	-0.211994	-1.12355	-0.355217	-0.631992	-1.18	-1.27445	-0.733052	-0.211799	0.0536167	5.98348
5.12003e-147	3.45792e-145	ENSOARG00000010491	20:27083482-27084528	protein_coding	PSORS1C2	psoriasis susceptibility 1 candidate 2 [Source:HGNC Symbol;Acc:17199]	5.94206	5.46164	-0.399379	-5.38472	-6.07322	-6.07322	-6.07322	-6.07322	-6.07322	-4.54485	-5.04577	3.90652	714.386	11.5933	10.245	4.92292	0	-2.28959	-2.33507	-1.64518	-1.96069	-2.38448	1.33018	1.02121	7.24607	6.76564	0.904627	-4.08071	-4.76922	-4.76922	-4.76922	-4.76922	-4.76922	-3.24084	-3.74176
7.02162e-147	4.72469e-145	ENSOARG00000009826	1:38621085-38687692	protein_coding	PGM1	phosphoglucomutase 1 [Source:HGNC Symbol;Acc:8905]	4.29126	5.18999	5.94467	5.55913	5.871	4.9219	5.35994	5.31225	4.75819	7.1909	11.3597	8.4661	713.747	-1.30291	-0.540126	0.356908	0	0.140993	-0.710731	-0.228215	-0.272712	-0.869261	1.6096	5.78895	3.43846	4.3372	5.09187	4.70633	5.0182	4.0691	4.50714	4.45945	3.90539	6.3381	10.5069
1.12231e-146	7.524e-145	ENSOARG00000016188	2:117267199-117314475	protein_coding	BIN1	bridging integrator 1 [Source:HGNC Symbol;Acc:1052]	2.05288	3.96427	2.02678	3.88901	2.71118	2.88179	3.09336	3.24351	3.76316	2.3007	8.9722	6.04622	712.799	-1.82895	0.11348	-1.78934	0	-1.14056	-0.986997	-0.784424	-0.685504	-0.111244	-1.62709	5.1022	1.40579	3.31719	1.3797	3.24192	2.0641	2.23471	2.44627	2.59643	3.11608	1.65362	8.32512
2.63685e-146	1.76128e-144	ENSOARG00000020306	3:193371342-193429711	protein_coding	GS	Glycogen synthase [Source:UniProtKB/TrEMBL;Acc:E9P1J4]	-5.3236	-3.42941	-6.07322	-5.06132	-6.07322	-6.07322	-2.16718	-2.30599	-6.07322	6.63519	-6.07322	2.9738	711.071	-0.588623	0.374654	-2.46311	0	-3.14886	-2.87924	2.4937	3.48344	-2.4933	10.9059	-2.29577	-6.65531	-4.76112	-7.40493	-6.39302	-7.40493	-7.40493	-3.49888	-3.63769	-7.40493	5.30348	-7.40493
3.33902e-146	2.22216e-144	ENSOARG00000000657	1:102578859-102579609	protein_coding	S100A3	S100 calcium binding protein A3 [Source:HGNC Symbol;Acc:10493]	3.91054	-3.42941	-6.07322	-2.84858	-6.07322	-6.07322	-6.07322	-6.07322	-6.07322	-6.07322	-6.07322	2.60816	710.594	7.30206	-1.87521	-5.2646	0	-5.39873	-5.64644	-4.72064	-5.28178	-5.88521	-4.24728	-5.28544	5.64751	-1.69244	-4.33626	-1.11161	-4.33626	-4.33626	-4.33626	-4.33626	-4.33626	-4.33626	-4.33626
1.3812e-145	9.15863e-144	ENSOARG00000012377	11:39871746-39884850	protein_coding	GSDMA	gasdermin A [Source:HGNC Symbol;Acc:13311]	6.1366	0.336116	2.102	-1.06806	-0.422289	-2.27044	-2.47526	-2.04917	-0.6734	-3.8126	-4.00308	3.46268	707.722	7.22889	0.736846	3.22492	0	-0.0274761	-1.45418	-1.46235	-1.03823	0.0635386	-1.69648	-2.32642	3.74896	-2.05152	-0.285639	-3.45569	-2.80993	-4.65807	-4.86289	-4.43681	-3.06104	-6.20024	-6.39072
3.51459e-145	2.32205e-143	ENSOARG00000007697	1:108536334-108543890	protein_coding	APCS	amyloid P component, serum [Source:HGNC Symbol;Acc:584]	-4.12942	-6.07322	-6.07322	-2.91136	8.23808	6.25192	3.28115	-3.25318	-3.46707	-4.54485	-6.07322	4.29579	705.832	-1.56543	-5.98028	-5.17398	0	9.33099	8.17677	5.40127	-0.524245	-1.85315	-2.50596	-4.97723	-6.42367	-8.36748	-8.36748	-5.20561	5.94383	3.95767	0.986892	-5.54743	-5.76132	-6.8391	-8.36748
5.00627e-145	3.29564e-143	ENSOARG00000020013	1:91193360-91219083	protein_coding	AMPD1	adenosine monophosphate deaminase 1 [Source:HGNC Symbol;Acc:468]	0.0571948	-1.05091	0.116784	-4.08253	-3.15367	-4.87186	-3.89287	-3.71554	-3.46707	-6.07322	10.537	7.42214	705.117	3.75595	2.93941	3.93792	0	0.760377	-0.344388	2.4375	0.448602	0.25797	-3.48384	14.1862	-2.36531	-3.47341	-2.30572	-6.50504	-5.57617	-7.29436	-6.31537	-6.13804	-5.88957	-8.49572	8.11454
8.73165e-145	5.7274e-143	ENSOARG00000008910	8:20559856-20566286	protein_coding	VGLL2	vestigial like 2 (Drosophila) [Source:HGNC Symbol;Acc:20232]	-6.07322	-6.07322	-6.07322	-6.07322	-6.07322	-6.07322	-5.51486	-6.07322	-6.07322	-6.07322	5.18485	1.87019	703.991	-0.0627678	0.0264444	-0.0521195	0	0.0264444	-0.124594	1.8329	-0.0531665	-0.277653	0.276157	12.2675	-5.84215	-5.84215	-5.84215	-5.84215	-5.84215	-5.84215	-5.28379	-5.84215	-5.84215	-5.84215	5.41592
3.29195e-144	2.15157e-142	ENSOARG00000001845	1:103049267-103067657	protein_coding	TPM3	tropomyosin 3 [Source:HGNC Symbol;Acc:12012]	2.81116	2.49278	2.55029	2.95818	3.33045	3.47343	3.27125	3.52251	3.43075	2.43789	9.44457	6.77445	701.307	-0.182179	-0.790783	-0.451946	0	0.0477276	0.302757	0.274621	0.525441	0.251379	-0.525169	6.65453	3.03211	2.71373	2.77124	3.17914	3.5514	3.69438	3.4922	3.74346	3.6517	2.65884	9.66552
4.74781e-144	3.09201e-142	ENSOARG00000014295	15:55404807-55417235	protein_coding	MUC15	mucin 15, cell surface associated [Source:HGNC Symbol;Acc:14956]	6.00636	5.87974	5.4889	-6.07322	-6.07322	-4.87186	-2.09629	-3.65638	-3.01479	-1.20735	-4.73684	4.02784	700.566	13.1094	12.8623	12.7277	0	-0.0904328	2.80941	5.22283	4.17467	4.15705	6.18968	2.87163	4.74633	4.61971	4.22887	-7.33325	-7.33325	-6.13189	-3.35631	-4.91641	-4.27482	-2.46738	-5.99686
1.76162e-142	1.14317e-140	Addition13	1:101428118-101428507		LCE5A		5.11217	1.84857	-6.07322	-6.07322	-6.07322	-6.07322	-6.07322	-6.07322	-6.07322	-6.07322	-6.07322	2.25037	693.255	12.33	9.39592	0.0397545	0	0.477105	0.482192	-0.142581	0.0556222	0.487948	-0.172305	-0.020334	6.47433	3.21072	-4.71106	-4.71106	-4.71106	-4.71106	-4.71106	-4.71106	-4.71106	-4.71106	-4.71106
4.64919e-142	3.00631e-140	ENSOARG00000004465	21:41778954-41790846	protein_coding	MACROD1	MACRO domain containing 1 [Source:HGNC Symbol;Acc:29598]	1.67773	1.64782	2.17135	1.55766	1.26547	1.15327	0.808096	1.15685	-0.617396	3.50016	7.31809	4.3686	691.291	0.0304087	-0.0588816	0.506369	0	-0.442278	-0.524518	-0.846884	-0.388739	-2.25419	1.798	5.67416	3.13969	3.10978	3.63331	3.01962	2.72743	2.61523	2.27005	2.61881	0.844563	4.96212	8.78005
1.24564e-141	8.02622e-140	ENSOARG00000004925	25:24413625-24498304	protein_coding	MYPN	myopalladin [Source:HGNC Symbol;Acc:23246]	-3.37128	-3.42941	-6.07322	-3.48162	-6.07322	-6.07322	-4.26812	-3.35665	-3.19687	-6.07322	10.6133	7.49131	689.297	-1.04976	-0.611679	-5.0267	0	-4.13519	-4.47199	-0.149385	-0.632341	-0.877699	-4.94467	12.9301	-5.47663	-5.53475	-8.17857	-5.58696	-8.17857	-8.17857	-6.37347	-5.46199	-5.30222	-8.17857	8.50794
2.80991e-141	1.80418e-139	ENSOARG00000020440	1:192424357-192442451	protein_coding	HRASLS	HRAS-like suppressor [Source:HGNC Symbol;Acc:14922]	-4.56801	-6.07322	-6.07322	-5.38472	-6.07322	-6.07322	-5.51486	-5.33913	-3.88017	-6.07322	5.1973	1.76255	687.651	0.766362	-1.90439	-1.80466	0	-1.90439	-1.89867	-0.0540429	-0.0191126	1.13284	-1.75985	10.4979	-4.19655	-5.70176	-5.70176	-5.01326	-5.70176	-5.70176	-5.1434	-4.96767	-3.50871	-5.70176	5.56876
6.90132e-141	4.41564e-139	ENSOARG00000006272	13:61852121-62088249	protein_coding			-4.56801	3.87509	0.0841782	-3.50264	0.359061	-3.70308	-3.40967	-3.57889	1.76937	11.438	-6.07322	7.745	685.833	-2.02709	5.76954	2.92028	0	2.24586	0.046764	0.17654	-1.1842	4.04831	14.0245	-4.46013	-4.44143	4.00167	0.210759	-3.37606	0.485641	-3.5765	-3.28309	-3.45231	1.89595	11.5646	-5.94664
1.44029e-140	9.18309e-139	ENSOARG00000003890	14:38781423-38789527	protein_coding	TAT	tyrosine aminotransferase [Source:HGNC Symbol;Acc:11573]	-5.33311	2.02476	-5.36705	-6.07322	-6.07322	-4.44351	0.997573	-1.8762	-5.00357	8.46137	-6.07322	4.7795	684.344	1.87129	8.68347	1.70354	0	-0.411873	3.59262	8.46582	6.59939	2.30411	15.2621	0.172677	-6.11132	1.24655	-6.14526	-6.85143	-6.85143	-5.22172	0.219364	-2.65441	-5.78178	7.68316	-6.85143
1.61594e-140	1.0264e-138	ENSOARG00000006264	5:15726237-15748767	protein_coding	ACER1	alkaline ceramidase 1 [Source:HGNC Symbol;Acc:18356]	5.02025	0.654646	4.81325	-5.06132	-6.07322	-6.07322	-5.2769	-4.58974	-4.94983	-6.07322	-6.07322	3.04168	684.111	9.76957	4.66272	9.4966	0	-3.05832	-2.93315	-0.685305	0.00709853	-0.540953	-2.53486	-2.39668	5.34038	0.974772	5.13338	-4.74119	-5.7531	-5.7531	-4.95677	-4.26961	-4.6297	-5.7531	-5.7531
1.62108e-140	1.0264e-138	ENSOARG00000010176	25:35298046-35314076	protein_coding	MAT1A	methionine adenosyltransferase I, alpha [Source:HGNC Symbol;Acc:6903]	3.20438	0.0404678	-3.71259	-0.828556	-1.30427	-0.741584	-1.58399	-2.73529	-2.13886	8.62246	-5.04577	4.9813	684.105	3.48225	-0.168107	-2.97052	0	-1.5291	-0.653217	-1.32488	-2.22876	-2.38555	9.21297	-3.97582	2.50839	-0.655526	-4.40858	-1.52455	-2.00027	-1.43758	-2.27998	-3.43129	-2.83485	7.92647	-5.74176
1.76948e-140	1.11649e-138	ENSOARG00000011732	12:21560568-21574910	protein_coding	SLC30A10	solute carrier family 30, member 10 [Source:HGNC Symbol;Acc:25355]	-4.57752	2.02476	-6.07322	-3.52785	3.37181	-6.07322	-6.07322	-5.03254	-3.88017	6.3126	-6.07322	2.73794	683.927	-0.889748	5.59727	-3.50397	0	6.94593	-3.63511	-3.30827	-0.992638	-0.749188	10.2529	-3.51956	-4.96156	1.64071	-6.45727	-3.9119	2.98776	-6.45727	-6.45727	-5.41659	-4.26422	5.92855	-6.45727
3.18998e-140	2.00584e-138	ENSOARG00000006513	23:62045722-62057218	protein_coding	SERPINB13	serpin peptidase inhibitor, clade B (ovalbumin), member 13 [Source:HGNC Symbol;Acc:8944]	3.96609	3.50085	5.57188	-5.38472	-3.97458	-3.68814	-3.74038	-3.71913	-4.13819	-6.07322	-6.07322	3.18885	682.735	9.46655	7.84587	11.0361	0	0.192305	0.549303	1.91556	2.46178	1.53044	-1.91394	-1.66379	3.56009	3.09485	5.16588	-5.79071	-4.38057	-4.09413	-4.14638	-4.12513	-4.54418	-6.47921	-6.47921
4.38559e-140	2.74815e-138	ENSOARG00000002327	4:112988244-112999581	protein_coding	ATG9B	autophagy related 9B [Source:HGNC Symbol;Acc:21899]	6.41235	6.308	5.6472	-1.01234	-0.992966	-3.45982	-1.96717	-1.48088	-1.50812	-4.67695	-2.05761	4.38799	682.091	7.21852	6.89597	6.574	0	-0.426338	-0.896531	-1.18624	-0.699068	-0.842078	-3.25196	-1.30697	3.59882	3.49447	2.83368	-3.82587	-3.80649	-6.27334	-4.7807	-4.29441	-4.32164	-7.49047	-4.87113
4.86625e-140	3.03891e-138	ENSOARG00000018936	3:217110594-217114377	protein_coding			2.0713	2.67994	4.1745	3.88057	3.96962	3.84421	3.91064	4.21525	-0.902964	8.31629	3.47813	5.19225	681.88	-1.8059	-1.3708	0.301987	0	-0.0801417	-0.0363036	0.0271633	0.334577	-4.80618	4.38424	-0.401118	1.56642	2.17507	3.66962	3.3757	3.46474	3.33933	3.40576	3.71038	-1.40784	7.81141	2.97326
5.29027e-140	3.29243e-138	ENSOARG00000002233	15:26930074-26931848	protein_coding	APOA5	apolipoprotein A-V [Source:HGNC Symbol;Acc:17288]	-6.07322	-3.42941	-6.07322	-6.07322	-1.30427	-6.07322	-5.51486	-6.07322	-6.07322	6.24411	-6.07322	2.6562	681.711	0.00573498	2.93891	0.0133426	0	5.15765	-0.432283	1.83281	-0.013169	-0.237555	13.3197	0.144244	-6.17622	-3.5324	-6.17622	-6.17622	-1.40727	-6.17622	-5.61785	-6.17622	-6.17622	6.14112	-6.17622
1.99886e-139	1.23977e-137	ENSOARG00000006766	26:6462919-6501142	protein_coding	ASB5	ankyrin repeat and SOCS box containing 5 [Source:HGNC Symbol;Acc:17180]	-2.59071	-2.00718	-3.97997	-0.375952	-2.63371	-1.47641	-1.8543	-0.187745	-2.78377	-2.21671	7.80036	4.68214	679.021	-1.82273	-1.92232	-3.12695	0	-2.5732	-0.481346	-0.869305	0.464397	-2.57819	-1.64943	8.18677	-2.91724	-2.33372	-4.30651	-0.702489	-2.96025	-1.80295	-2.18084	-0.514283	-3.11031	-2.54325	7.47382
2.62311e-139	1.62144e-137	ENSOARG00000008659	2:156650358-156853665	protein_coding	NEB	nebulin [Source:HGNC Symbol;Acc:7720]	5.34854	4.37536	3.30377	4.09051	4.95312	4.82749	4.98036	4.82893	5.64062	3.40707	15.6326	12.5381	678.471	1.25813	0.388971	-0.869505	0	0.966907	0.654218	0.945377	0.649279	1.47492	-0.620402	11.4542	0.911241	-0.0619369	-1.13353	-0.346788	0.515828	0.390195	0.543062	0.391634	1.20332	-1.03023	11.1953
3.90084e-139	2.4031e-137	ENSOARG00000003091	1:21236796-21243492	protein_coding			-5.31763	-6.07322	-6.07322	-6.07322	-6.07322	-6.07322	-6.07322	-6.07322	-6.07322	6.22279	-6.07322	2.52023	677.668	1.79014	-0.607411	0.0235275	0	-0.607411	-0.430914	0.0812215	-0.00415891	-0.200806	13.2294	0.16547	-5.36307	-6.11867	-6.11867	-6.11867	-6.11867	-6.11867	-6.11867	-6.11867	-6.11867	6.17734	-6.11867
4.17429e-139	2.5629e-137	ENSOARG00000007582	2:22436353-22447063	protein_coding	MURC	muscle-related coiled-coil protein [Source:HGNC Symbol;Acc:33742]	1.63495	-6.07322	-2.13115	-1.1074	-2.63371	-1.05077	-1.90164	-1.59957	-1.83595	-6.07322	8.4963	5.36432	677.531	2.76364	-6.04893	-1.01199	0	-1.67749	-0.0194733	-0.0422217	-0.0719999	-0.812201	-6.23055	9.46335	1.51592	-6.19225	-2.25018	-1.22643	-2.75273	-1.16979	-2.02066	-1.71859	-1.95497	-6.19225	8.37727
1.35161e-138	8.27067e-137	ENSOARG00000013485	8:52870867-52879447	protein_coding			5.64893	-6.07322	-5.3689	-6.07322	-3.97458	-2.85588	-4.08963	-6.07322	-1.18688	-6.07322	-6.07322	2.68793	675.153	12.8393	0.0313628	1.60351	0	2.95092	3.87958	3.48754	-0.0341139	5.68857	0.173203	-0.0532878	5.26378	-6.45838	-5.75405	-6.45838	-4.35974	-3.24103	-4.47479	-6.45838	-1.57204	-6.45838	-6.45838
2.07169e-138	1.26345e-136	ENSOARG00000008786	11:26350126-26358870	protein_coding			5.38407	-6.07322	-6.07322	-5.38472	-0.519775	-2.73899	-2.29119	-2.1746	-6.07322	-6.07322	-6.07322	2.4229	674.289	10.9684	-0.982716	-1.70791	0	5.55529	3.33777	3.10285	3.75395	-1.05953	-1.96596	-1.80107	4.14896	-7.30834	-7.30834	-6.61983	-1.75489	-3.9741	-3.5263	-3.40971	-7.30834	-7.30834	-7.30834
5.78793e-138	3.5181e-136	ENSOARG00000001550	AMGL01122391.1:21-3775	protein_coding			-3.54802	-6.07322	-4.64951	-5.23916	-3.15367	-6.07322	-6.07322	-6.07322	-6.07322	-4.67695	5.80234	2.42777	672.209	1.65023	-1.46995	1.85732	0	2.35097	-1.54636	-1.90312	-1.81566	-1.62723	1.0123	11.1468	-3.88943	-6.41464	-4.99093	-5.58057	-3.49509	-6.41464	-6.41464	-6.41464	-6.41464	-5.01837	5.46092
6.73344e-138	4.07921e-136	ENSOARG00000005704	14:47426122-47552121	protein_coding	RYR1	ryanodine receptor 1 (skeletal) [Source:HGNC Symbol;Acc:10483]	1.0651	0.504154	0.832517	0.445068	-1.14024	-1.20873	0.17413	0.683237	4.6843	0.0289676	13.3199	10.2121	671.903	0.332009	0.190068	0.193927	0	-1.47056	-1.60698	0.0352394	0.120166	4.2393	-0.716491	12.6387	-2.81382	-3.37477	-3.0464	-3.43385	-5.01916	-5.08765	-3.70479	-3.19568	0.805376	-3.84995	9.44095
2.33385e-137	1.40919e-135	ENSOARG00000000108	11:40948501-40948779	protein_coding			3.60605	-6.07322	-6.07322	-6.07322	-6.07322	-6.07322	-6.07322	-6.07322	-6.07322	-6.07322	-6.07322	1.62033	669.387	11.4811	-0.825454	-0.0549365	0	-0.825454	-0.755094	0.350276	-0.0975893	-0.670671	0.274063	0.102463	5.44772	-4.23156	-4.23156	-4.23156	-4.23156	-4.23156	-4.23156	-4.23156	-4.23156	-4.23156	-4.23156
5.93938e-137	3.57441e-135	ENSOARG00000001823	14:59548305-59556856	protein_coding	TNNT1	troponin T type 1 (skeletal, slow) [Source:HGNC Symbol;Acc:11948]	-0.567438	-1.30509	-1.04253	-3.57772	-3.15367	-6.07322	-4.34866	-2.57194	-4.59047	-6.07322	8.86912	5.97063	667.496	2.31468	1.4558	1.73897	0	-0.464697	-4.25287	0.469056	0.644908	-1.2246	-4.4103	11.9368	-0.225535	-0.963186	-0.700629	-3.23582	-2.81177	-5.73132	-4.00676	-2.23004	-4.24856	-5.73132	9.21102
7.05061e-137	4.22921e-135	ENSOARG00000015650	9:72759035-72856330	protein_coding	DPYS	dihydropyrimidinase [Source:HGNC Symbol;Acc:3013]	-0.386227	0.0404678	-3.55055	0.65491	0.863099	1.82621	1.79484	-0.463062	0.0331953	7.49647	-4.09311	3.9994	667.149	-0.948313	-1.02772	-3.52444	0	-0.200539	0.853031	1.15684	-1.11222	-0.8642	7.04849	-3.00556	-1.0706	-0.643902	-4.23492	-0.02946	0.178729	1.14184	1.11047	-1.14743	-0.651175	6.8121	-4.77748
1.04204e-136	6.23002e-135	ENSOARG00000009216	15:77816389-77820062	protein_coding			-6.07322	-6.07322	-6.07322	-6.07322	-1.30427	-6.07322	-6.07322	-6.07322	5.68789	-1.57018	-6.07322	2.83029	666.358	0.0558883	-1.20315	0.0719506	0	4.53909	-0.886743	0.186731	0.00047371	13.0329	5.79745	0.453471	-5.44059	-5.44059	-5.44059	-5.44059	-0.671643	-5.44059	-5.44059	-5.44059	6.32052	-0.937551	-5.44059
3.32797e-136	1.98319e-134	ENSOARG00000009611	JH922057.1:1918-13641	protein_coding			1.78117	3.55927	1.61987	3.20865	2.00472	2.42809	2.66816	2.75971	3.2174	1.57037	7.85437	4.9839	664.008	-1.3916	0.348646	-1.58423	0	-1.20766	-0.840513	-0.564483	-0.446678	-0.0600017	-1.60861	4.64918	0.702562	2.48066	0.541263	2.13004	0.926109	1.34948	1.58955	1.6811	2.13879	0.491756	6.77576
6.97669e-136	4.14397e-134	ENSOARG00000010208	22:30253100-30325727	protein_coding	RBM20	RNA binding motif protein 20 [Source:HGNC Symbol;Acc:27424]	0.545728	-1.30509	-1.16228	-1.08238	0.464782	0.967028	-0.700394	-0.775833	-2.21287	-3.14857	7.36929	4.25509	662.509	1.44716	-0.270169	0.0653392	0	1.51864	2.2076	0.230222	0.613768	-0.85467	-2.68832	8.36845	-1.55256	-3.40337	-3.26056	-3.18067	-1.6335	-1.13126	-2.79868	-2.87412	-4.31115	-5.24686	5.27101
7.95755e-136	4.71123e-134	ENSOARG00000000104	11:40855369-40855767	protein_coding	IIIA3-like	LOC101112657/keratin, high-sulfur matrix protein, IIIA3-like	4.51473	1.13618	-6.07322	-6.07322	-6.07322	-6.07322	-6.07322	-6.07322	-6.07322	-6.07322	-6.07322	2.29958	662.243	12.1293	7.72031	-0.0928269	0	-0.48421	-0.573615	0.342612	-0.11791	-0.668311	0.533002	-0.0484152	5.84027	2.46172	-4.74768	-4.74768	-4.74768	-4.74768	-4.74768	-4.74768	-4.74768	-4.74768	-4.74768
9.00428e-136	5.31369e-134	ENSOARG00000010033	19:32405339-32420823	protein_coding	LMOD3	leiomodin 3 (fetal) [Source:HGNC Symbol;Acc:6649]	-2.60361	-3.42941	-6.07322	-3.84988	-3.97458	-4.62635	-4.12033	-2.9005	-3.88017	-6.07322	10.4721	7.37395	661.993	0.768938	-0.00250396	-4.1143	0	-0.606465	-0.359228	1.10103	0.937086	-0.796657	-4.14982	13.6165	-3.79769	-4.6235	-7.26731	-5.04397	-5.16867	-5.82044	-5.31442	-4.09458	-5.07426	-7.26731	9.27804
1.46184e-135	8.59894e-134	ENSOARG00000017434	7:10363537-10528209	protein_coding	CMYA5	cardiomyopathy associated 5 [Source:HGNC Symbol;Acc:14305]	6.34913	5.95238	5.63343	6.16401	5.78176	5.76317	5.9354	5.95505	7.00675	7.58699	14.4848	11.4261	661.012	0.151557	-0.060881	-0.545498	0	-0.231527	-0.33161	-0.258987	-0.222427	0.900645	1.39127	8.32915	2.63543	2.23869	1.91974	2.45031	2.06806	2.04947	2.2217	2.24135	3.29305	3.8733	10.7711
3.21413e-135	1.88456e-133	ENSOARG00000006636	2:241464116-241499800	protein_coding	GRHL3	grainyhead-like 3 (Drosophila) [Source:HGNC Symbol;Acc:25839]	4.47469	6.41205	5.70217	-1.80447	-3.97458	-4.29777	-3.94021	-3.09235	-5.00357	-4.54485	-6.07322	3.63456	659.417	6.1965	7.3869	7.30163	0	-3.17869	-1.91228	-1.41693	-1.29481	-3.60158	-2.72158	-5.41531	3.33587	5.27324	4.56335	-2.94329	-5.1134	-5.43659	-5.07903	-4.23117	-6.14238	-5.68366	-7.21204
3.26191e-135	1.90644e-133	ENSOARG00000012328	2:183217546-183255434	protein_coding	MARCO	macrophage receptor with collagenous structure [Source:HGNC Symbol;Acc:6895]	-6.07322	-6.07322	-6.07322	-5.38472	-6.07322	-4.51444	-5.12906	-5.03254	4.44084	5.16096	-6.07322	2.1588	659.387	-1.9124	-1.20124	-1.90098	0	-1.20124	0.468855	0.0178696	0.590125	9.60793	10.9118	-2.01685	-6.6553	-6.6553	-6.6553	-5.96679	-6.6553	-5.09651	-5.71113	-5.61461	3.85876	4.57888	-6.6553
3.74831e-135	2.18372e-133	ENSOARG00000017016	3:133739439-133744414	protein_coding	KRT6-B	cow ortho keratin6	5.63052	3.83624	11.1608	1.83026	0.563283	1.2711	2.34859	0.554241	-6.07322	-0.988065	-4.73684	8.15168	659.105	3.58888	1.14041	9.10393	0	-2.13906	-0.852735	0.316523	-0.494312	-9.32749	-3.30907	-6.24428	4.87691	3.08264	10.4072	1.07665	-0.190322	0.5175	1.59499	-0.199363	-6.82683	-1.74167	-5.49044
4.25402e-135	2.47045e-133	ENSOARG00000009962	15:78013263-78020638	protein_coding	SMTNL1	smoothelin-like 1 [Source:HGNC Symbol;Acc:32394]	-5.31763	-6.07322	-6.07322	-6.07322	-3.97458	-5.24692	-5.51486	-4.30869	-6.07322	-6.07322	4.92583	1.48095	658.849	1.74962	-0.474734	-0.020879	0	2.44482	1.67312	1.88889	2.99533	-0.343415	0.0977172	12.0514	-5.12992	-5.88552	-5.88552	-5.88552	-3.78687	-5.05922	-5.32715	-4.12098	-5.88552	-5.88552	5.11354
5.71642e-135	3.30917e-133	ENSOARG00000005293	15:75306114-75312299	protein_coding	PACSIN3	protein kinase C and casein kinase substrate in neurons 3 [Source:HGNC Symbol;Acc:8572]	4.66425	4.90096	5.0898	3.25686	2.5879	2.19828	2.3839	2.91797	0.0893419	5.37548	7.96056	5.41304	658.251	1.40777	1.50919	1.81531	0	-0.80529	-1.14318	-0.872997	-0.307457	-3.24664	2.13023	4.69371	3.5098	3.74651	3.93534	2.10241	1.43345	1.04382	1.22945	1.76351	-1.06511	4.22102	6.8061
7.35175e-135	4.24238e-133	ENSOARG00000006548	20:16970546-16976101	protein_coding	SLC22A7	solute carrier family 22 (organic anion transporter), member 7 [Source:HGNC Symbol;Acc:10971]	-4.58349	-3.42941	-5.3689	-5.33932	-6.07322	-6.07322	-5.12906	-6.07322	-4.53012	6.26549	-4.73684	2.51335	657.742	0.691561	1.85706	-0.272152	0	-1.66645	-1.94176	0.0829603	-1.89388	0.775856	12.0007	0.947531	-5.31381	-4.15972	-6.09921	-6.06963	-6.80354	-6.80354	-5.85937	-6.80354	-5.26044	5.53518	-5.46715
8.95269e-135	5.14991e-133	ENSOARG00000007959	21:44008864-44040998	protein_coding	SPTBN2	spectrin, beta, non-erythrocytic 2 [Source:HGNC Symbol;Acc:11276]	8.27399	7.78369	7.66524	3.17018	1.1112	2.74523	4.57744	4.93977	0.176731	-0.855739	1.25881	6.27469	657.343	4.90365	4.3186	4.31409	0	-2.3588	-0.765251	1.22773	1.57508	-3.34067	-3.87062	-2.07448	5.46684	4.97654	4.8581	0.363033	-1.69595	-0.0619219	1.7703	2.13262	-2.63042	-3.66289	-1.54834
1.05776e-134	6.06548e-133	Addition43	1:101997626-101998193		PRD-SPRRII-like6P		-6.07322	-6.07322	4.79291	-6.07322	-6.07322	-6.07322	-6.07322	-6.07322	-6.07322	-6.07322	-6.07322	2.00127	657.005	-0.0712818	-0.284743	11.9258	0	-0.284743	-0.349348	0.1837	-0.0688035	-0.41871	0.290344	-0.0290821	-5.25464	-5.25464	5.61149	-5.25464	-5.25464	-5.25464	-5.25464	-5.25464	-5.25464	-5.25464	-5.25464
8.066e-134	4.61077e-132	ENSOARG00000008165	3:162593753-162604684	protein_coding	HSD17B6	hydroxysteroid (17-beta) dehydrogenase 6 [Source:HGNC Symbol;Acc:23316]	2.92151	2.86115	-3.06165	-5.38472	0.121087	-4.62635	-3.11603	-2.67023	-6.07322	8.54505	-3.69415	5.05191	652.892	8.35618	7.45245	3.49708	0	4.70398	1.05632	3.22302	2.56875	-2.13502	13.8062	2.00739	2.9804	2.92005	-3.00275	-5.32582	0.179981	-4.56745	-3.05714	-2.61134	-6.01433	8.60394	-3.63526
8.18857e-134	4.66621e-132	ENSOARG00000004970	1:236943080-236988212	protein_coding			5.19918	-6.07322	-6.07322	-6.07322	-6.07322	-5.24692	-4.15498	-5.31358	-5.00357	-4.54485	-5.03054	2.80412	652.862	12.6989	-0.673076	0.065281	0	-0.673076	1.69676	3.45405	1.90867	2.12498	2.62419	3.1225	3.01617	-8.25623	-8.25623	-8.25623	-8.25623	-7.42993	-6.33799	-7.49659	-7.18658	-6.72786	-7.21355
2.03829e-133	1.15789e-131	ENSOARG00000007765	1:250255941-250274418	protein_coding	IL20RB	interleukin 20 receptor beta [Source:HGNC Symbol;Acc:6004]	5.3073	3.82041	4.73123	-2.49014	-0.992966	-4.29777	-1.24439	-3.53042	-0.543475	-2.2473	-5.04577	3.16321	651.015	7.74339	6.04315	7.19061	0	1.20905	-0.768435	1.23747	-0.295725	1.75657	0.119948	-1.8205	5.40735	3.92046	4.83128	-2.39009	-0.892915	-4.19772	-1.14434	-3.43036	-0.443424	-2.14725	-4.94572
2.94319e-133	1.66674e-131	ENSOARG00000016473	11:41105175-41108801	protein_coding	V15	Ovis aries type I wool keratin intermediate filament 8c1 (V15), mRNA. [Source:RefSeq mRNA;Acc:NM_001009445]	8.02166	-3.42941	-1.30106	-5.33932	-6.07322	-6.07322	-6.07322	-6.07322	-6.07322	-6.07322	-3.20917	6.4439	650.271	14.3024	1.37679	4.11405	0	-2.14672	-2.23133	-1.52644	-1.86653	-2.31792	-1.37586	3.43176	7.66439	-3.78668	-1.65833	-5.69659	-6.43049	-6.43049	-6.43049	-6.43049	-6.43049	-6.43049	-3.56644
3.07424e-133	1.73556e-131	ENSOARG00000017379	11:41331945-41334745	protein_coding	LOC101118712	LOC101118712/keratin, type I cytoskeletal 42-like	4.04522	1.37174	6.0195	-1.93339	-3.97458	-6.07322	-4.46709	-6.07322	-6.07322	-6.07322	-6.07322	3.35231	650.183	5.3647	2.46753	7.29175	0	-3.05373	-6.03124	-2.73295	-5.8654	-6.09381	-5.63244	-5.84749	4.65126	1.97777	6.62554	-1.32736	-3.36855	-5.46719	-3.86106	-5.46719	-5.46719	-5.46719	-5.46719
4.57023e-133	2.57216e-131	ENSOARG00000008718	1:34598262-34641310	protein_coding			1.81002	2.30068	0.040064	1.74834	2.20107	0.356927	0.389949	0.404933	-0.147381	10.7491	-1.22851	7.46817	649.38	0.0367632	0.214915	-1.88167	0	0.115155	-1.71958	-1.5381	-1.30775	-2.28598	9.1963	-2.8845	1.00184	1.4925	-0.768115	0.940164	1.3929	-0.451252	-0.41823	-0.403246	-0.955561	9.94092	-2.03669
8.01669e-133	4.49798e-131	ENSOARG00000012598	14:54622334-54625335	protein_coding	KCNA7	potassium voltage-gated channel, shaker-related subfamily, member 7 [Source:HGNC Symbol;Acc:6226]	-5.3236	-6.07322	-6.07322	-6.07322	-6.07322	-6.07322	-6.07322	-6.07322	-6.07322	-6.07322	5.01993	1.50375	648.242	1.77926	-0.0860734	-0.0131112	0	-0.0860734	-0.0997279	0.0430618	-0.0167414	-0.114862	0.0630643	12.0865	-5.38157	-6.13119	-6.13119	-6.13119	-6.13119	-6.13119	-6.13119	-6.13119	-6.13119	-6.13119	4.96196
1.12785e-132	6.30871e-131	ENSOARG00000008405	1:109545108-109556887	protein_coding	CASQ1	calsequestrin 1 (fast-twitch, skeletal muscle) [Source:HGNC Symbol;Acc:1512]	-2.5414	-2.54971	-3.13747	0.171738	-1.14024	-1.90103	-1.18258	-0.981401	-1.94927	-2.7026	11.3064	8.25798	647.551	-2.41076	-2.8637	-2.87611	0	-1.41391	-1.68916	-1.07797	-1.40651	-2.1643	-3.41269	10.9833	-4.68087	-4.68918	-5.27694	-1.96773	-3.27971	-4.0405	-3.32205	-3.12087	-4.08874	-4.84207	9.16689
2.43922e-132	1.36022e-130	ENSOARG00000000351	1:101983797-101999447	protein_coding	~CIR1	close to corepressor interacting with RBPJ, 1	-3.8279	-3.42941	11.3159	-0.904821	-3.97458	-3.31308	-1.86011	-3.27453	-3.88017	-6.07322	-6.07322	8.23505	645.989	-3.70572	-3.85675	11.793	0	-4.46071	-3.40443	-0.337216	-2.80113	-3.79912	-7.06209	-6.72093	-5.20918	-4.81069	9.93466	-2.2861	-5.35586	-4.69436	-3.24139	-4.65581	-5.26145	-7.45451	-7.45451
4.88489e-132	2.71573e-130	ENSOARG00000001616	9:14502313-14503340	protein_coding	LY6D	lymphocyte antigen 6 complex, locus D [Source:HGNC Symbol;Acc:13348]	1.05808	1.99685	5.04299	-6.07322	-6.07322	-6.07322	-4.01774	-6.07322	-6.07322	-6.07322	-6.07322	2.23593	644.583	8.29524	8.53157	12.2634	0	-0.535813	-0.342081	3.6506	0.0135891	-0.085418	-0.163293	0.166844	2.42767	3.36644	6.41258	-4.70363	-4.70363	-4.70363	-2.64814	-4.70363	-4.70363	-4.70363	-4.70363
7.52455e-132	4.17052e-130	ENSOARG00000019146	7:20524488-20538003	protein_coding	TGM1	transglutaminase 1 [Source:HGNC Symbol;Acc:11777]	5.43133	7.91718	9.46246	-0.631025	-1.70178	-1.05077	-1.66886	-1.40197	0.252213	-1.97377	0.555494	6.62662	643.708	5.90873	8.1939	9.86773	0	-1.46029	-0.611243	-0.64745	-1.00922	0.956185	-1.76876	1.32157	4.19193	6.67779	8.22307	-1.87042	-2.94118	-2.29017	-2.90825	-2.64137	-0.987185	-3.21317	-0.683904
7.60635e-132	4.20308e-130	ENSOARG00000012230	19:54752592-54871608	protein_coding	SLC6A11	solute carrier family 6 (neurotransmitter transporter), member 11 [Source:HGNC Symbol;Acc:11044]	-4.12942	-1.61384	-4.42427	-2.21805	-6.07322	-6.07322	-4.648	-4.62623	-6.07322	6.91078	-6.07322	3.3813	643.686	-1.35975	0.941628	-1.87636	0	-4.48459	-4.87426	-1.71887	-1.3668	-5.21781	9.82449	-5.02421	-4.87013	-2.35455	-5.16498	-2.95876	-6.81393	-6.81393	-5.38871	-5.36695	-6.81393	6.17007	-6.81393
2.15641e-131	1.18798e-129	ENSOARG00000005345	21:49170143-49186522	protein_coding	SCT	secretin [Source:HGNC Symbol;Acc:10607]	4.34256	-6.07322	-4.6961	-6.07322	-6.07322	-6.07322	-6.07322	-6.07322	-6.07322	-6.07322	-6.07322	2.33061	641.576	12.0842	-0.640303	2.46268	0	-0.640303	-0.653688	0.344327	-0.108893	-0.668603	0.413568	0.0136992	6.84074	-3.57504	-2.19792	-3.57504	-3.57504	-3.57504	-3.57504	-3.57504	-3.57504	-3.57504	-3.57504
2.6315e-131	1.44534e-129	ENSOARG00000001714	9:14530307-14532195	protein_coding	LYPD2	LY6/PLAUR domain containing 2 [Source:HGNC Symbol;Acc:25215]	-1.18771	2.86115	7.15507	-4.65081	-6.07322	-6.07322	-6.07322	-5.06111	-6.07322	-6.07322	-4.00308	4.24656	641.172	4.07898	6.82524	11.9436	0	-3.10766	-2.95642	-2.48298	0.0737351	-2.7687	-2.63558	1.28219	0.18188	4.23075	8.52466	-3.28122	-4.70363	-4.70363	-4.70363	-3.69152	-4.70363	-4.70363	-2.63349
3.97678e-131	2.17767e-129	ENSOARG00000006914	3:5369149-5382662	protein_coding	PPAPDC3	phosphatidic acid phosphatase type 2 domain containing 3 [Source:HGNC Symbol;Acc:28174]	-0.169786	-2.00718	0.221225	0.200216	-0.992966	-0.866409	-0.492977	0.0303017	-0.679629	-0.18513	6.84795	3.76331	640.336	-0.450934	-1.90885	0.155983	0	-0.872388	-0.546164	-0.777115	-0.267201	-0.661875	-0.642286	6.72828	0.228042	-1.60935	0.619053	0.598044	-0.595138	-0.468581	-0.0951483	0.42813	-0.2818	0.212698	7.24578
1.33246e-130	7.27465e-129	ENSOARG00000014229	5:4991123-5001918	protein_coding	SLC5A5	solute carrier family 5 (sodium/iodide cotransporter), member 5 [Source:HGNC Symbol;Acc:11040]	-3.54732	4.0208	-4.7938	6.32545	-1.48938	-2.6178	-2.87612	-4.61528	-3.04737	-3.14857	-4.72552	5.13059	637.887	-11.1172	-3.88323	-11.5894	0	-9.42314	-10.6339	-10.1101	-12.0103	-11.3831	-9.88962	-11.1222	-4.44262	3.1255	-5.6891	5.43014	-2.38468	-3.5131	-3.77143	-5.51059	-3.94267	-4.04387	-5.62083
1.86481e-130	1.01507e-128	Addition38	1:101897897-101898135		PRD-SPRRII-like2P		-6.07322	-6.07322	4.86267	-5.33932	-6.07322	-6.07322	-5.2769	-6.07322	-6.07322	-6.07322	-6.07322	2.19542	637.206	-1.89906	-1.93153	10.2645	0	-1.93153	-2.1049	0.152874	-1.88829	-2.2781	-1.34165	-1.89543	-4.00226	-4.00226	6.93363	-3.26835	-4.00226	-4.00226	-3.20593	-4.00226	-4.00226	-4.00226	-4.00226
1.97938e-130	1.07422e-128	ENSOARG00000000688	1:123121952-123122116	protein_coding			4.59596	-6.07322	-6.07322	-6.07322	-6.07322	-6.07322	-6.07322	-6.07322	-6.07322	-6.07322	-6.07322	1.9159	637.086	12.0248	-0.367615	0.0840218	0	-0.367615	-0.0907825	-0.0926096	0.0686403	0.303599	-0.333441	0.187952	7.19543	-3.47376	-3.47376	-3.47376	-3.47376	-3.47376	-3.47376	-3.47376	-3.47376	-3.47376	-3.47376
2.86244e-130	1.54886e-128	ENSOARG00000005796	11:26078867-26080665	pseudogene			1.03518	-2.00718	-3.71241	-5.11256	-6.07322	-6.07322	-6.07322	-6.07322	0.935791	6.08184	-3.51291	2.46497	636.339	5.52044	2.37479	1.37727	0	-2.64753	-2.71397	-2.51211	-2.62291	5.22073	10.7279	1.98315	0.189588	-2.85277	-4.558	-5.95815	-6.91881	-6.91881	-6.91881	-6.91881	0.0902004	5.23625	-4.3585
7.10572e-130	3.83352e-128	ENSOARG00000016328	11:41084470-41088829	protein_coding	KRT34	LOC100526781/keratin 34	7.47957	-2.54971	-0.188283	-6.07322	-3.97458	-6.07322	-6.07322	-6.07322	-6.07322	-6.07322	-5.03054	5.54538	634.497	15.2956	3.96156	7.18696	0	2.42173	-0.482313	0.206013	-0.066778	-0.465252	0.21968	2.78933	7.18796	-2.84131	-0.479887	-6.36483	-4.26618	-6.36483	-6.36483	-6.36483	-6.36483	-6.36483	-5.32214
2.38628e-129	1.28359e-127	ENSOARG00000021173	7:76472655-76480520	protein_coding	RDH12	retinol dehydrogenase 12 (all-trans/9-cis/11-cis) [Source:HGNC Symbol;Acc:19977]	4.98406	2.69739	2.20203	-6.07322	1.01005	-6.07322	-5.51486	-6.07322	-4.94983	-4.67695	-6.07322	2.27703	632.043	12.0883	9.60765	9.33659	0	7.91663	-0.0821195	1.70552	0.0100066	2.2297	2.8387	0.0517697	5.02949	2.74282	2.24746	-6.02779	1.05548	-6.02779	-5.46943	-6.02779	-4.90439	-4.63152	-6.02779
2.47703e-129	1.32849e-127	ENSOARG00000020687	1:205529110-205637763	protein_coding	USP13	ubiquitin specific peptidase 13 (isopeptidase T-3) [Source:HGNC Symbol;Acc:12611]	3.48366	4.55836	3.68226	5.56498	5.4956	3.85556	3.87234	3.85799	4.68733	1.92854	9.70463	6.84083	631.968	-2.06245	-0.705765	-1.80451	0	0.231698	-1.53928	-1.68399	-1.70996	-0.699555	-3.56921	4.21697	1.09933	2.17403	1.29793	3.18065	3.11128	1.47123	1.48801	1.47366	2.303	-0.45579	7.32031
2.91735e-129	1.56005e-127	ENSOARG00000006831	23:26380250-26427620	protein_coding	DSC3	desmocollin 3 [Source:HGNC Symbol;Acc:3037]	8.69725	6.81209	7.73623	-5.38472	-2.2523	-4.07286	0.273802	-1.25137	-1.37257	-6.07322	-5.04577	6.33256	631.636	14.3823	12.1718	13.2793	0	3.05555	2.84578	5.79272	5.77769	4.37073	-1.98287	1.0713	7.30493	5.41977	6.34392	-6.77703	-3.64462	-5.46518	-1.11852	-2.64369	-2.76488	-7.46554	-6.43809
2.95392e-129	1.57499e-127	ENSOARG00000000083	JH922475.1:21-18649	protein_coding			-2.6376	-1.05091	-1.41186	-2.18068	1.87648	-4.51444	-4.04765	-4.02043	-3.01479	7.52538	-4.41867	4.25052	631.611	-1.06188	0.12923	0.29765	0	3.07607	-3.64192	-2.32408	-2.03003	-1.67233	9.50941	-1.69584	-3.54526	-1.95857	-2.31952	-3.08834	0.968824	-5.4221	-4.95531	-4.92809	-3.92245	6.61772	-5.32633
3.86008e-129	2.05214e-127	ENSOARG00000003852	21:48802868-48805457	protein_coding	TNNI2	troponin I type 2 (skeletal, fast) [Source:HGNC Symbol;Acc:11946]	-1.39844	-1.61384	-3.71994	-0.557014	-0.624329	-1.44383	-1.3845	-1.22365	0.324999	1.06418	10.1681	7.09842	631.069	-2.10355	-2.50587	-4.58713	0	-1.4998	-2.03356	-1.61351	-1.78233	-0.388824	0.255153	9.46747	-0.690042	-0.905445	-3.01155	0.151383	0.084067	-0.735433	-0.676101	-0.515257	1.0334	1.77258	10.8765
1.00253e-128	5.31428e-127	ENSOARG00000019457	3:139520648-139569216	protein_coding	SLC38A4	solute carrier family 38, member 4 [Source:HGNC Symbol;Acc:14679]	2.50499	1.5359	-2.3322	0.557169	1.07827	1.72206	1.24314	0.897359	3.62279	9.93876	3.33555	6.37634	629.136	1.95779	0.816012	-2.26734	0	0.356991	1.01271	0.665771	0.254805	2.97342	9.36314	2.80451	-0.112077	-1.08116	-4.94927	-2.05989	-1.5388	-0.895004	-1.37393	-1.7197	1.00572	7.3217	0.718483
1.10879e-128	5.86052e-127	ENSOARG00000007579	5:59545166-59557329	protein_coding	MYOZ3	Ovis aries myozenin 3 (MYOZ3), mRNA. [Source:RefSeq mRNA;Acc:NM_001199795]	-1.51426	-2.54971	-1.52397	-2.78135	-6.07322	-2.37827	-6.07322	-1.58521	-1.75664	-2.7026	6.69283	3.46059	628.932	0.725054	0.0742268	0.870002	0	-4.38515	0.02124	-4.95462	1.07706	0.660529	-0.487989	8.99635	-1.07008	-2.10552	-1.07979	-2.33717	-5.62904	-1.93408	-5.62904	-1.14102	-1.31246	-2.25842	7.13702
1.29654e-128	6.83305e-127	ENSOARG00000009284	6:84396381-84421279	protein_coding			-6.07322	-2.54971	-1.3864	-4.95026	5.59063	-3.06756	-3.30415	-2.99853	-6.07322	6.18461	-6.07322	3.29429	628.615	-2.63329	1.53767	3.14114	0	9.74192	0.91886	2.24276	1.57047	-2.95996	11.1318	-2.57291	-6.7531	-3.22958	-2.06628	-5.63013	4.91076	-3.74744	-3.98402	-3.6784	-6.7531	5.50474	-6.7531
4.62494e-128	2.43042e-126	ENSOARG00000003939	23:40464436-40464966	protein_coding	LRRC30	leucine rich repeat containing 30 [Source:HGNC Symbol;Acc:30219]	-5.3236	-6.07322	-6.07322	-6.07322	-6.07322	-6.07322	-4.97693	-5.33913	-6.07322	-6.07322	5.18932	1.70564	626.039	1.84803	0.230641	0.0187656	0	0.230641	0.227727	3.13264	1.78083	0.22448	-0.0849495	12.3477	-4.41039	-5.16001	-5.16001	-5.16001	-5.16001	-5.16001	-4.06371	-4.42592	-5.16001	-5.16001	6.10253
5.08644e-128	2.66526e-126	ENSOARG00000003662	21:48663833-48665280	protein_coding			-6.07322	-6.07322	-6.07322	-6.07322	-6.07322	-6.07322	-6.07322	-6.07322	-6.07322	6.12919	-5.03054	2.3703	625.846	-0.0616349	0.55572	-0.0558343	0	0.55572	0.201529	0.0418561	-0.0411444	-0.117555	13.5424	2.63613	-4.29231	-4.29231	-4.29231	-4.29231	-4.29231	-4.29231	-4.29231	-4.29231	-4.29231	7.9101	-3.24963
5.26546e-128	2.75116e-126	ENSOARG00000002688	26:35067544-35163115	protein_coding	ANK1	ankyrin 1, erythrocytic [Source:HGNC Symbol;Acc:492]	-0.707994	-1.30509	-2.65785	-1.02725	-0.245099	0.45317	-0.878165	-0.149565	0.898949	2.3007	7.01946	3.89341	625.776	0.304458	-0.278564	-0.564361	0	0.795391	1.47516	-0.00115802	0.888574	1.89195	3.17903	7.9254	-3.17188	-3.76897	-5.12173	-3.49114	-2.70898	-2.01071	-3.34205	-2.61345	-1.56494	-0.16318	4.55557
7.16643e-128	3.73371e-126	ENSOARG00000016231	2:201944630-202012588	protein_coding	AOX-like/LOC101104808	aldehyde oxidase-like	6.92449	9.88595	9.14585	-0.485645	-0.519775	-1.77925	-0.439057	-1.90345	0.452609	-2.2473	-1.85963	6.88875	625.151	6.67165	9.37296	8.74586	0	-1.0482	-2.30147	-0.766801	-1.93674	0.0334782	-2.75071	-2.20867	4.92161	7.88307	7.14297	-2.48853	-2.52266	-3.78213	-2.44194	-3.90634	-1.55027	-4.25019	-3.86252
2.53093e-127	1.31486e-125	ENSOARG00000004857	16:7986543-7989083	protein_coding			-6.07322	-6.07322	-6.07322	-4.95026	-3.15367	-6.07322	-5.2769	-5.31358	-4.94983	-4.67695	5.28698	1.82496	622.595	-2.60867	-2.54764	-2.59884	0	1.27328	-2.6782	-0.69413	-0.847652	-0.637869	0.620228	9.85464	-5.80614	-5.80614	-5.80614	-4.68318	-2.88659	-5.80614	-5.00982	-5.0465	-4.68275	-4.40987	5.55406
2.85361e-127	1.47828e-125	ENSOARG00000018755	12:78591681-78596742	protein_coding	TNNI1	troponin I type 1 (skeletal, slow) [Source:HGNC Symbol;Acc:11945]	-5.31763	-6.07322	-3.71623	-6.07322	-6.07322	-6.07322	-6.07322	-6.07322	-6.07322	-6.07322	5.31831	1.89257	622.352	1.75775	-0.892112	4.27213	0	-0.892112	-0.675711	0.169397	-0.0231122	-0.388256	-0.110056	12.6704	-4.49905	-5.25464	-2.89765	-5.25464	-5.25464	-5.25464	-5.25464	-5.25464	-5.25464	-5.25464	6.13689
4.66138e-127	2.40794e-125	ENSOARG00000021053	7:62267423-62278819	protein_coding	DUOXA1	dual oxidase maturation factor 1 [Source:HGNC Symbol;Acc:26507]	4.50412	4.85117	4.07678	-3.13859	-6.07322	-6.07322	-6.07322	-6.07322	-5.00357	-6.07322	-6.07322	2.67401	621.358	6.89593	6.62535	6.43612	0	-5.29867	-5.09135	-4.87476	-4.82878	-2.65291	-5.07219	-4.69989	2.75566	3.10271	2.32832	-4.88705	-7.82168	-7.82168	-7.82168	-7.82168	-6.75203	-7.82168	-7.82168
7.32929e-127	3.77541e-125	ENSOARG00000009865	21:25785258-25789326	protein_coding			-2.86946	-2.00718	-1.23072	-2.78385	-6.07322	-2.1499	-3.05769	-3.85565	-6.07322	7.74546	-6.07322	4.11189	620.441	0.369566	0.567826	1.48229	0	-4.45449	0.361601	-0.129238	-1.42517	-4.41853	10.3566	-4.48364	-1.511	-0.648729	0.127732	-1.4254	-4.71477	-0.791442	-1.69923	-2.49719	-4.71477	9.10392	-4.71477
8.19189e-127	4.20786e-125	ENSOARG00000008456	1:253633735-253672933	protein_coding	TF	Transferrin [Source:UniProtKB/TrEMBL;Acc:O18780]	2.50113	3.98573	-0.683638	2.76624	2.30437	1.84407	2.16071	3.3247	4.43304	13.3229	1.70626	9.63506	620.215	-0.381903	1.18457	-3.59404	0	-0.498277	-1.18983	-0.752275	0.913152	1.3939	10.6031	-1.19282	1.42047	2.90507	-1.7643	1.68558	1.22372	0.763417	1.08005	2.24404	3.35238	12.2422	0.625606
1.04214e-126	5.33804e-125	ENSOARG00000016395	20:44602287-44618637	protein_coding	TFAP2A	transcription factor AP-2 alpha (activating enhancer binding protein 2 alpha) [Source:HGNC Symbol;Acc:11742]	4.57786	3.00821	3.0358	-6.07322	-6.07322	-4.17659	-4.5707	-6.07322	-5.00357	-4.67695	-6.07322	2.1202	619.728	11.6717	9.83926	10.1268	0	-0.240835	4.11042	2.5558	-0.00144379	2.10251	2.88199	0.0566803	4.15455	2.5849	2.61249	-6.49653	-6.49653	-4.5999	-4.99401	-6.49653	-5.42688	-5.10026	-6.49653
1.0544e-126	5.38571e-125	ENSOARG00000012950	1:263986324-264000997	protein_coding	FTCD	formimidoyltransferase cyclodeaminase [Source:HGNC Symbol;Acc:3974]	-6.07322	-3.42941	-6.07322	-5.38472	-6.07322	-6.07322	-6.07322	-6.07322	-5.00357	6.01262	-6.07322	2.32159	619.704	-1.76915	1.11839	-1.76795	0	-2.40512	-2.18261	-1.78931	-1.79456	0.276963	11.0924	-1.61964	-6.79918	-4.15537	-6.79918	-6.11068	-6.79918	-6.79918	-6.79918	-6.79918	-5.72953	5.28667	-6.79918
2.63918e-126	1.34429e-124	ENSOARG00000018457	24:36569069-36595967	protein_coding			-2.19	-0.647009	-0.873064	-1.23059	2.18569	-1.96621	-2.37789	-2.68147	-4.94983	8.29662	-4.54036	4.61567	617.845	-1.63323	-0.432978	-0.451352	0	2.41424	-1.90783	-1.87233	-1.88471	-4.9049	9.13206	-2.58634	-2.44581	-0.902812	-1.12887	-1.48639	1.92989	-2.22201	-2.63369	-2.93728	-5.20563	8.04082	-4.79616
3.11088e-126	1.58014e-124	ENSOARG00000001064	19:48056132-48069789	protein_coding	ITIH3	inter-alpha-trypsin inhibitor heavy chain 3 [Source:HGNC Symbol;Acc:6168]	-5.31763	1.75168	-5.3689	-5.06132	-3.15367	-4.44351	-6.07322	-4.21927	-0.331574	11.5453	-3.70938	7.84577	617.512	-0.787828	6.04579	-0.95434	0	1.04499	0.840066	-2.3716	2.1535	3.864	16.512	1.31227	-6.77706	0.292252	-6.82833	-6.52075	-4.6131	-5.90294	-7.53265	-5.6787	-1.79101	10.0859	-5.16881
3.76102e-126	1.90506e-124	ENSOARG00000002655	14:34022615-34039786	protein_coding	CES4A	carboxylesterase 4A [Source:HGNC Symbol;Acc:26741]	7.31871	-3.42941	-1.22018	-2.76672	-6.07322	-4.05724	-6.07322	-4.85632	-6.07322	2.6038	-6.07322	4.48658	617.127	9.60609	-1.6178	0.709415	0	-5.14131	-2.23512	-5.02607	-2.31453	-5.55592	5.12781	-5.29315	4.98758	-5.76054	-3.55131	-5.09785	-8.40435	-6.38837	-8.40435	-7.18746	-8.40435	0.272671	-8.40435
6.3361e-126	3.20052e-124	ENSOARG00000000476	26:27928794-27932445	protein_coding	DUSP26	dual specificity phosphatase 26 (putative) [Source:HGNC Symbol;Acc:28161]	0.813311	-2.54971	1.96141	0.70816	-0.737057	0.165265	0.786107	1.29569	-1.05717	0.363911	8.53797	5.45097	616.071	-0.194253	-3.00612	1.0848	0	-1.1473	-0.503016	-0.305857	0.23707	-1.68971	-0.653219	7.58058	1.46621	-1.89681	2.61431	1.36106	-0.0841555	0.818166	1.43901	1.9486	-0.404266	1.01681	9.19087
5.89162e-125	2.96778e-123	ENSOARG00000004924	5:36370853-36378931	protein_coding	F12	coagulation factor XII (Hageman factor) [Source:HGNC Symbol;Acc:3530]	-2.04918	-0.196757	-1.02973	-4.21635	-3.97458	-4.87186	-6.07322	-3.85565	-3.04737	6.33552	-6.07322	2.60735	611.552	2.33934	3.49964	3.00672	0	-0.444942	-0.486413	-2.92997	-0.0432531	0.543754	10.5662	-3.06	-2.91866	-1.06623	-1.89921	-5.08583	-4.84406	-5.74134	-6.9427	-4.72512	-3.91685	5.46605	-6.9427
9.10929e-125	4.57598e-123	ENSOARG00000014571	15:55912012-55977913	protein_coding	BBOX1	butyrobetaine (gamma), 2-oxoglutarate dioxygenase (gamma-butyrobetaine hydroxylase) 1 [Source:HGNC Symbol;Acc:964]	3.61638	-6.07322	3.18381	-4.65081	0.41289	-3.31107	0.120637	-3.89735	-1.71113	7.37796	-5.03054	4.04378	610.669	8.19204	-2.82535	7.83681	0	4.65269	3.12856	4.75721	1.45065	2.73319	11.8775	0.329541	3.26137	-6.42824	2.82879	-5.00583	0.0578735	-3.66608	-0.23438	-4.25237	-2.06615	7.02294	-5.38555
1.26027e-124	6.31348e-123	ENSOARG00000014703	24:35085594-35097624	protein_coding	MYL10	myosin, light chain 10, regulatory [Source:HGNC Symbol;Acc:29825]	-2.89556	-2.54971	-2.4055	-4.37281	-6.07322	-5.24692	-5.51486	-5.33913	-6.07322	-6.07322	5.21569	1.77747	610.011	2.06938	0.743186	1.90359	0	-3.7162	-1.44855	-1.18485	-1.22067	-3.3162	-3.12415	9.37442	-4.78308	-4.43723	-4.29302	-6.26034	-7.96075	-7.13445	-7.40239	-7.22666	-7.96075	-7.96075	3.32816
2.23535e-124	1.11675e-122	ENSOARG00000007702	18:67844539-67855646	protein_coding	ADSSL1	adenylosuccinate synthase like 1 [Source:HGNC Symbol;Acc:20093]	2.87275	3.08975	3.27771	3.69393	1.98708	2.16612	2.44303	3.40468	1.41277	2.6964	7.77742	4.98422	608.85	-0.778174	-0.324513	-0.379343	0	-1.42862	-1.25741	-1.24866	-0.292595	-2.01811	-1.14223	4.14575	2.62787	2.84486	3.03282	3.44904	1.7422	1.92123	2.19814	3.15979	1.16788	2.45151	7.53253
2.54408e-124	1.26752e-122	ENSOARG00000004893	11:14068770-14072575	protein_coding	CCL16	chemokine (C-C motif) ligand 16 [Source:HGNC Symbol;Acc:10614]	-4.30474	-0.834869	-4.7938	-5.38472	-3.97458	-5.24692	-4.99181	-4.54253	-5.00357	8.49334	-2.87328	4.82663	608.588	1.28274	4.07442	1.31073	0	0.774852	-0.0945013	0.78235	1.99312	-0.0123169	13.9764	3.818	-2.63816	0.831707	-3.12722	-3.71814	-2.308	-3.58035	-3.32524	-2.87595	-3.33699	10.1599	-1.20671
2.55773e-124	1.27085e-122	ENSOARG00000016784	11:41168178-41172256	protein_coding	KRT35	Ovis aries keratin 35 (K35), mRNA. [Source:RefSeq mRNA;Acc:NM_001114761]	7.19371	3.88274	5.1173	0.833509	-6.07322	-6.07322	-6.07322	-5.31358	-6.07322	-6.07322	-6.07322	5.73991	608.577	6.59083	2.12004	4.46967	0	-8.83519	-9.04442	-8.20996	-6.951	-9.2455	-7.84808	-8.68939	6.73848	3.42751	4.66207	0.37828	-6.52845	-6.52845	-6.52845	-5.76881	-6.52845	-6.52845	-6.52845
3.40387e-124	1.68667e-122	ENSOARG00000014702	16:65280195-65721184	protein_coding	ADCY2	adenylate cyclase 2 (brain) [Source:HGNC Symbol;Acc:233]	2.36526	1.3276	0.59788	0.740482	-1.14024	-0.234179	1.0244	2.14307	2.07798	-1.21016	7.74534	4.74598	607.998	1.61833	0.554808	-0.148694	0	-1.93257	-0.984068	0.343428	1.54998	1.24051	-0.958366	6.99621	0.642355	-0.395299	-1.12502	-0.982421	-2.86314	-1.95708	-0.698503	0.420164	0.355077	-2.93306	6.02243
6.43657e-124	3.18078e-122	ENSOARG00000013734	6:24611875-24614695	protein_coding	DDIT4L	DNA-damage-inducible transcript 4-like [Source:HGNC Symbol;Acc:30555]	-0.287448	-2.00718	-3.71994	-0.596944	-3.15367	-0.437524	-1.77469	0.269087	-1.58573	-6.07322	6.63011	3.44346	606.707	-0.167057	-1.89164	-3.82917	0	-3.09304	-0.108033	-1.48344	0.356052	-1.24962	-7.34065	6.84062	-0.193569	-1.9133	-3.62606	-0.503065	-3.05979	-0.343645	-1.68081	0.362966	-1.49185	-5.97934	6.72399
2.19256e-123	1.08058e-121	ENSOARG00000011505	3:163493291-163495349	protein_coding	METTL7B	methyltransferase like 7B [Source:HGNC Symbol;Acc:28276]	-5.31763	-1.05091	-6.07322	-6.07322	1.57974	-1.75228	-2.54069	-6.07322	-5.00357	8.73267	2.971	5.09924	604.223	1.77109	4.92181	0.0499839	0	7.57124	5.34241	6.50846	-0.00976016	1.74296	16.1225	10.5655	-4.8437	-0.576975	-5.59929	-5.59929	2.05367	-1.27835	-2.06676	-5.59929	-4.52964	9.20661	3.44493
3.61092e-123	1.7748e-121	ENSOARG00000003297	16:2759563-2779410	protein_coding	GABRP	gamma-aminobutyric acid (GABA) A receptor, pi [Source:HGNC Symbol;Acc:4089]	4.54066	4.23307	-5.3689	-4.21635	-6.07322	-6.07322	-6.07322	-6.07322	-5.00357	-2.5877	-6.07322	2.32666	603.211	9.05605	7.79611	-1.51369	0	-3.50961	-3.61089	-2.71807	-3.17308	-1.51178	4.03007	-3.11249	4.03375	3.72616	-5.8758	-4.72326	-6.58013	-6.58013	-6.58013	-6.58013	-5.51047	-3.09461	-6.58013
3.91863e-123	1.92087e-121	ENSOARG00000014564	8:58476105-58761249	protein_coding	EYA4	eyes absent homolog 4 (Drosophila) [Source:HGNC Symbol;Acc:3522]	-2.14614	0.0404678	-3.66736	-1.70036	-6.07322	-6.07322	-3.0976	2.16931	-0.069052	2.56314	7.37994	4.28377	603.046	-0.489681	2.11826	-1.87482	0	-4.98497	-5.55135	-0.913611	3.62324	1.16306	4.32459	8.81513	-3.15621	-0.969596	-4.67743	-2.71043	-7.08329	-7.08329	-4.10767	1.15925	-1.07912	1.55308	6.36988
8.03011e-123	3.92571e-121	ENSOARG00000008058	3:162428460-162436986	protein_coding	SDR9C7	short chain dehydrogenase/reductase family 9C, member 7 [Source:HGNC Symbol;Acc:29958]	5.72939	1.64782	1.84408	-5.33932	0.464782	-6.07322	-5.2769	-6.07322	-6.07322	-2.2473	-6.07322	2.88842	601.592	11.0787	6.98142	7.29128	0	5.79402	-1.78223	-0.0161112	-1.81013	-1.83225	3.01929	-1.82706	5.81559	1.73403	1.93028	-5.25312	0.550983	-5.98702	-5.1907	-5.98702	-5.98702	-2.1611	-5.98702
1.68286e-122	8.20509e-121	ENSOARG00000007405	12:4210173-4269729	protein_coding	C4BPA	complement component 4 binding protein, alpha [Source:HGNC Symbol;Acc:1325]	-1.96803	2.27766	-0.663944	3.41154	7.9084	6.54859	3.92559	6.32966	2.90387	10.4445	-1.94043	7.10714	600.092	-4.91354	-1.18371	-4.06008	0	4.44919	3.02047	0.604278	2.9056	-0.612553	7.04967	-5.11036	-4.26845	-0.0227524	-2.96436	1.11113	5.60798	4.24817	1.62517	4.02924	0.603455	8.14413	-4.24085
1.78859e-122	8.69734e-121	ENSOARG00000008444	6:83893826-83946666	protein_coding	TMPRSS11E	transmembrane protease, serine 11E [Source:HGNC Symbol;Acc:24465]	3.99888	5.46927	5.19314	-6.07322	-6.07322	-3.10748	-4.99181	-5.33913	-4.13819	-4.08955	-6.07322	3.12028	599.968	11.2431	11.8083	12.5164	0	-0.73393	5.62894	2.60921	1.81914	3.45056	3.74263	0.164303	3.46383	4.93422	4.65808	-6.60828	-6.60828	-3.64253	-5.52687	-5.87419	-4.67324	-4.62461	-6.60828
2.9643e-122	1.4376e-120	ENSOARG00000004692	8:83028720-83060568	protein_coding	SLC22A2	solute carrier family 22 (organic cation transporter), member 2 [Source:HGNC Symbol;Acc:10966]	-3.15598	-3.42941	-6.07322	-5.38472	-6.07322	-6.07322	-6.07322	-6.07322	-6.07322	5.93271	-4.73684	2.57829	598.944	3.76547	0.303696	-1.84889	0	-3.21982	-2.86562	-1.78567	-1.92794	-2.31327	11.043	1.35955	-3.86262	-4.13605	-6.77986	-6.09136	-6.77986	-6.77986	-6.77986	-6.77986	-6.77986	5.22607	-5.44348
5.34065e-122	2.5832e-120	ENSOARG00000006585	23:62068918-62077944	protein_coding	SERPINB3/4-like2		3.1298	3.57823	8.04152	-2.01137	-0.164048	-1.32949	-1.23996	-1.84427	-0.642887	-0.860482	-6.07322	5.19227	597.751	5.43232	4.56662	10.1905	0	0.813191	0.423619	1.05458	0.662647	1.95832	1.01192	-4.93669	1.17523	1.62366	6.08695	-3.96594	-2.11862	-3.28406	-3.19453	-3.79884	-2.59746	-2.81505	-8.02779
9.47304e-122	4.56987e-120	ENSOARG00000001682	3:205801838-205853818	protein_coding	A2ML1	alpha-2-macroglobulin-like 1 [Source:HGNC Symbol;Acc:23336]	-1.60137	10.6645	13.3374	1.68586	1.64867	1.09691	1.2067	-1.21473	-1.58184	-1.20735	-4.00308	10.3599	596.589	-3.0003	8.09651	11.5705	0	-0.922763	-0.721447	-0.360132	-3.2198	-3.63321	-3.04882	-5.29446	-3.7346	8.5313	11.2041	-0.447371	-0.484567	-1.03632	-0.926536	-3.34796	-3.71507	-3.34059	-6.13632
1.13334e-121	5.4529e-120	ENSOARG00000016448	24:35822789-35833934	protein_coding	TFR2	transferrin receptor 2 [Source:HGNC Symbol;Acc:11762]	-0.452693	-0.0732743	-1.91607	-2.67813	-1.70178	-1.64778	-2.06306	-0.660644	5.37298	7.49307	-3.38914	4.10462	596.226	2.67294	2.89449	0.730222	0	1.24203	0.903944	0.556322	2.41051	8.03632	10.4181	-0.213251	-1.74312	-1.3637	-3.20649	-3.96855	-2.9922	-2.9382	-3.35349	-1.95107	4.08255	6.20265	-4.67956
1.98238e-121	9.51284e-120	ENSOARG00000000164	11:50119677-50120600	protein_coding	MYADML2	myeloid-associated differentiation marker-like 2 [Source:HGNC Symbol;Acc:34548]	-6.07322	-6.07322	-6.07322	-5.23916	-6.07322	-6.07322	-6.07322	-6.07322	-6.07322	-6.07322	4.69171	1.12724	595.092	-1.83533	-1.90964	-1.82885	0	-1.90964	-1.94784	-1.73309	-1.83362	-1.9894	-1.68437	9.95168	-5.95919	-5.95919	-5.95919	-5.12512	-5.95919	-5.95919	-5.95919	-5.95919	-5.95919	-5.95919	4.80575
2.44999e-121	1.17259e-119	ENSOARG00000012738	8:47919664-47940996	protein_coding	RRAGD	Ras-related GTP binding D [Source:HGNC Symbol;Acc:19903]	1.00014	2.38923	3.04518	2.43336	1.53189	0.921223	0.589407	1.58522	0.676567	-0.370412	6.70874	3.86674	594.663	-1.55071	0.138833	0.495945	0	-0.720168	-1.27678	-1.90133	-0.952511	-1.5018	-3.1808	4.19639	0.921532	2.31062	2.96657	2.35475	1.45328	0.842613	0.510798	1.50661	0.597958	-0.449022	6.63013
1.716e-120	8.19144e-119	ENSOARG00000001036	12:196023-197959	protein_coding	MYOG	myogenin (myogenic factor 4) [Source:HGNC Symbol;Acc:7612]	-6.07322	-6.07322	-6.07322	-6.07322	-6.07322	-6.07322	-6.07322	-6.07322	-6.07322	-6.07322	4.5652	0.987117	590.717	0.0330625	-0.364356	0.0324877	0	-0.364356	-0.205737	0.00295566	0.0177033	-0.00477965	-0.14398	11.7123	-5.29973	-5.29973	-5.29973	-5.29973	-5.29973	-5.29973	-5.29973	-5.29973	-5.29973	-5.29973	5.33869
3.26613e-120	1.55503e-118	ENSOARG00000016036	11:41042320-41047434	protein_coding	KIFI	Ovis aries keratin 33 (K33), mRNA. [Source:RefSeq mRNA;Acc:NM_001199067]	8.28707	-3.42941	1.19381	-6.07322	-6.07322	-6.07322	-6.07322	-5.03254	-6.07322	-6.07322	-3.69807	6.63939	589.412	16.3245	3.37977	8.56784	0	-0.143743	-0.337761	0.23307	2.35139	-0.521593	0.504947	4.16412	8.00611	-3.71037	0.912852	-6.35418	-6.35418	-6.35418	-6.35418	-5.31349	-6.35418	-6.35418	-3.97903
3.58964e-120	1.70461e-118	ENSOARG00000009643	14:51880405-51887087	protein_coding	NKPD1	NTPase, KAP family P-loop domain containing 1 [Source:HGNC Symbol;Acc:24739]	3.18516	0.854503	4.70099	-5.06132	-3.15367	-6.07322	-4.99181	-4.33852	-6.07322	-4.67695	-6.07322	2.22401	589.221	7.77581	5.01898	9.27573	0	0.918109	-2.87035	0.0748797	0.479862	-2.83265	0.526418	-2.49649	1.90778	-0.422886	3.4236	-6.33871	-4.43106	-7.35061	-6.2692	-5.61591	-7.35061	-5.95434	-7.35061
6.75564e-120	3.19972e-118	ENSOARG00000016491	17:2468980-2473980	protein_coding			4.68293	-6.07322	0.542393	-5.23916	4.37077	-6.07322	-6.07322	-5.31358	-6.07322	2.67419	-5.04577	2.27843	587.939	10.002	-2.0772	5.81833	0	9.36628	-2.00874	-1.7824	-0.0393803	-1.92688	7.9088	1.04805	5.21826	-5.53789	1.07772	-4.70382	4.90611	-5.53789	-5.53789	-4.77825	-5.53789	3.20952	-4.51044
6.93705e-120	3.27713e-118	ENSOARG00000002862	3:206525820-206562443	protein_coding	CD163	CD163 molecule [Source:HGNC Symbol;Acc:1631]	3.06155	3.94249	3.70955	5.54428	5.15812	5.74923	5.4986	6.04759	9.28685	9.37627	3.27891	6.99988	587.885	-2.42283	-1.26851	-1.8274	0	-0.052479	0.313241	-0.0138843	0.517626	3.85887	3.91354	-2.25562	0.993913	1.87485	1.64191	3.47664	3.09048	3.68159	3.43096	3.97995	7.21921	7.30863	1.21127
9.44876e-120	4.45215e-118	ENSOARG00000004018	5:56804753-56891975	protein_coding	SPINK5	serine peptidase inhibitor, Kazal type 5 [Source:HGNC Symbol;Acc:15464]	8.96571	8.80894	9.09212	-2.37975	-6.07322	-3.9822	-4.49857	-2.89766	-1.42838	-2.7026	-1.93555	7.15401	587.258	11.2555	10.8763	11.5853	0	-5.00587	-0.31718	-0.81188	-0.518821	1.1457	-0.688961	2.51397	7.09387	6.93709	7.22028	-4.25159	-7.94507	-5.85404	-6.37042	-4.76951	-3.30023	-4.57445	-3.8074
1.33811e-119	6.28879e-118	ENSOARG00000021906	23:57793086-57793170	miRNA			-6.07322	-6.07322	-6.07322	-6.07322	-6.07322	-6.07322	-6.07322	-6.07322	-6.07322	5.80418	-6.07322	2.128	586.553	-0.02027	-0.481612	-0.0101327	0	-0.481612	-0.39674	0.122654	-0.031467	-0.294837	12.9762	0.0823353	-2.51683	-2.51683	-2.51683	-2.51683	-2.51683	-2.51683	-2.51683	-2.51683	-2.51683	9.36057	-2.51683
2.05519e-119	9.63402e-118	ENSOARG00000003386	26:35728802-35737811	protein_coding			3.77519	4.12762	5.0377	4.54058	4.58229	4.34463	4.81089	4.67701	4.32452	4.46399	8.63178	6.03852	585.683	-0.75165	-0.486387	0.487452	0	-0.0315531	-0.168827	0.257712	0.127441	-0.195686	-0.149797	4.07725	4.00119	4.35363	5.2637	4.76658	4.8083	4.57064	5.0369	4.90302	4.55053	4.68999	8.85778
2.27664e-119	1.06447e-117	ENSOARG00000014456	14:56045952-56054035	protein_coding	KLK12	kallikrein-related peptidase 12 [Source:HGNC Symbol;Acc:6360]	3.84129	2.30068	6.19142	-2.92952	-1.95094	-4.44351	-3.16121	-3.53286	-6.07322	-3.95745	-3.51418	3.47906	585.475	6.40746	5.17545	8.81956	0	0.883987	-0.580083	-0.494514	-0.283038	-4.4442	-0.269056	-0.0407489	1.58247	0.0418573	3.9326	-5.18834	-4.20976	-6.70233	-5.42003	-5.79168	-8.33204	-6.21627	-5.773
7.54941e-119	3.52081e-117	ENSOARG00000003812	AMGL01121454.1:21-5165	protein_coding			-6.07322	7.85392	-6.07322	-6.07322	-3.97458	-6.07322	-6.07322	-6.07322	-6.07322	-2.06052	-6.07322	3.15153	583.045	-0.0278958	14.2872	-0.0136486	0	2.27969	-0.531386	0.176327	-0.0438062	-0.396837	5.3432	0.118322	-6.46829	7.45886	-6.46829	-6.46829	-4.36964	-6.46829	-6.46829	-6.46829	-6.46829	-2.45559	-6.46829
1.15585e-118	5.37677e-117	ENSOARG00000021095	1:101329722-101333508	protein_coding	CRNN	cornulin [Source:HGNC Symbol;Acc:1230]	4.78973	11.1351	4.99477	-6.07322	-6.07322	-6.07322	-6.07322	-6.07322	-3.98716	-0.988065	-6.07322	6.59633	582.181	12.2141	17.3967	12.4234	0	-0.811689	-0.677117	0.23691	-0.0583257	3.58268	6.59056	0.147802	3.91553	10.2609	4.12056	-6.94743	-6.94743	-6.94743	-6.94743	-6.94743	-4.86136	-1.86227	-6.94743
2.31117e-118	1.07237e-116	ENSOARG00000005194	21:49121961-49187027	protein_coding			4.11954	-6.07322	-4.6961	-6.07322	-6.07322	-6.07322	-6.07322	-6.07322	-6.07322	-6.07322	-6.07322	2.06554	580.776	11.8022	-0.623918	2.46644	0	-0.623918	-0.640472	0.336255	-0.107215	-0.658814	0.409291	0.0100513	3.62078	-6.57198	-5.19486	-6.57198	-6.57198	-6.57198	-6.57198	-6.57198	-6.57198	-6.57198	-6.57198
3.02571e-118	1.40035e-116	ENSOARG00000006469	13:62009503-62018909	protein_coding			-5.31763	7.93568	-4.38847	-6.07322	-3.97458	-6.07322	-6.07322	-6.07322	-3.20605	-3.8126	-6.07322	3.23432	580.23	1.7342	14.1835	2.88161	0	2.09418	-0.705561	0.270844	-0.0682263	3.35568	4.42528	0.151094	-4.83767	8.41563	-3.90851	-5.59327	-3.49463	-5.59327	-5.59327	-5.59327	-2.72609	-3.33265	-5.59327
4.10872e-118	1.89677e-116	ENSOARG00000017035	3:133772163-133781755	protein_coding	KRT75	keratin 75 [Source:HGNC Symbol;Acc:24431]	6.8314	3.99986	4.70425	-2.53866	-1.30427	-4.29777	-1.05454	-2.55858	-5.00357	-4.54485	-4.00308	4.38156	579.609	8.60005	5.06564	6.35218	0	-0.264528	-1.91268	0.732743	0.264857	-3.65523	-2.55663	-1.69714	6.25803	3.42649	4.13088	-3.11204	-1.87765	-4.87115	-1.62791	-3.13196	-5.57694	-5.11822	-4.57646
6.87953e-118	3.16789e-116	ENSOARG00000013269	5:41851283-41852034	protein_coding	LEAP2	liver expressed antimicrobial peptide 2 [Source:HGNC Symbol;Acc:29571]	-3.53862	-0.331807	-1.39024	-1.97613	3.3022	0.287036	2.65015	1.77849	-2.31717	8.70761	-1.3169	5.2287	578.564	-1.22421	0.90006	0.441576	0	4.54653	2.14234	4.4902	3.91343	-0.0489995	10.2147	0.679019	-1.42459	1.78223	0.723795	0.137902	5.41624	2.40107	4.76419	3.89253	-0.203136	10.8216	0.797138
1.35999e-117	6.2467e-116	ENSOARG00000002247	19:12424641-12429797	pseudogene			-6.07322	-6.07322	-6.07322	-3.97894	-6.07322	-4.87186	-4.52283	-3.99838	-4.94983	-6.07322	8.66298	6.18287	577.182	-3.54234	-2.15535	-3.55438	0	-2.15535	0.322245	0.487841	0.0213285	-0.768122	-3.6822	13.3426	-8.43891	-8.43891	-8.43891	-6.34463	-8.43891	-7.23756	-6.88852	-6.36407	-7.31552	-8.43891	6.29729
1.98482e-117	9.09375e-116	ENSOARG00000007716	4:98301817-98320855	protein_coding	BPGM	2,3-bisphosphoglycerate mutase [Source:HGNC Symbol;Acc:1093]	3.88452	2.38923	3.73631	2.80667	4.68704	2.17981	2.33054	2.2323	2.92919	2.53273	6.99594	4.47704	576.415	1.07949	-0.571327	0.927504	0	1.72812	-0.787103	-0.462157	-0.576466	-0.0404788	-0.188204	4.19342	3.79638	2.30109	3.64816	2.71852	4.5989	2.09167	2.2424	2.14416	2.84105	2.44458	6.9078
2.01979e-117	9.23081e-116	ENSOARG00000000342	1:101868308-101930299	protein_coding	SPRR3	small proline-rich protein 3 [Source:HGNC Symbol;Acc:11268]	7.30438	8.98464	9.08245	-3.37218	-6.07322	-6.07322	-4.06898	-5.33913	-5.00357	-6.07322	-6.07322	6.75266	576.38	10.1091	10.6023	11.5228	0	-5.45556	-5.25492	0.231444	-2.91159	-2.87145	-4.90005	-4.59131	8.58717	10.2674	10.3652	-2.08939	-4.79043	-4.79043	-2.78619	-4.05634	-3.72078	-4.79043	-4.79043
4.55996e-117	2.07877e-115	ENSOARG00000006907	23:29143004-29258615	protein_coding	CDH2	Neural-cadherin [Source:UniProtKB/TrEMBL;Acc:Q30DR0]	0.990086	0.91541	-1.47579	1.06578	0.514873	0.888028	0.54745	0.490346	3.7014	7.48362	-4.72552	3.97472	574.728	-0.334038	-0.17141	-2.57666	0	-0.573773	-0.375212	-0.804798	-0.85235	2.4259	6.2246	-4.77514	-1.19261	-1.26728	-3.65849	-1.11691	-1.66782	-1.29466	-1.63524	-1.69235	1.51871	5.30092	-6.90822
5.34539e-117	2.43075e-115	ENSOARG00000017209	7:9823002-9941996	protein_coding	DMGDH	dimethylglycine dehydrogenase [Source:HGNC Symbol;Acc:24475]	-1.91536	-2.00718	-6.07322	-4.37281	-3.97458	-3.06756	0.522461	-1.64666	-6.07322	8.17998	-6.07322	4.73387	574.406	2.72804	1.59098	-2.96676	0	-0.511786	0.906814	5.02294	3.11565	-2.78642	12.1151	-2.8615	-3.4349	-3.52672	-7.59276	-5.89235	-5.49412	-4.5871	-0.997081	-3.16621	-7.59276	6.66044	-7.59276
1.74024e-116	7.89387e-115	ENSOARG00000001026	11:24800461-24825331	protein_coding	SLC13A5	solute carrier family 13 (sodium-dependent citrate transporter), member 5 [Source:HGNC Symbol;Acc:23089]	-4.86102	-2.54971	-4.60787	-1.91578	-1.48938	1.30108	-0.358931	-0.676208	-2.44406	7.24284	-5.04577	3.61523	572.012	-2.44946	-1.49674	-1.7726	0	-0.402675	2.93699	1.36298	1.00207	-1.0181	8.86536	-2.51964	-6.22222	-3.91092	-5.96907	-3.27698	-2.85058	-0.06013	-1.72014	-2.03742	-3.80527	5.88163	-6.40698
2.20882e-116	9.99449e-115	ENSOARG00000015757	1:259940222-259940575	protein_coding			3.80918	-1.05091	-6.07322	-6.07322	-6.07322	-5.24692	-4.83073	-6.07322	-6.07322	-6.07322	-6.07322	1.89107	571.528	11.6925	5.72074	-0.124614	0	-0.279208	1.58776	2.85251	-0.142236	-0.722851	0.795382	-0.140792	5.30735	0.447273	-4.57504	-4.57504	-4.57504	-3.74874	-3.33255	-4.57504	-4.57504	-4.57504	-4.57504
3.20086e-116	1.44474e-114	ENSOARG00000006447	9:50348468-50428242	protein_coding	JPH1	junctophilin 1 [Source:HGNC Symbol;Acc:14201]	0.363875	2.71463	0.863522	2.20599	-0.0873097	2.39435	3.06365	2.22141	-0.505346	-1.29066	9.512	6.43616	570.776	-2.14945	0.306463	-1.69803	0	-2.50527	0.060964	0.555933	0.105096	-2.84784	-3.92991	6.97403	-0.67034	1.68041	-0.170694	1.17177	-1.12153	1.36013	2.02944	1.1872	-1.53956	-2.32488	8.47779
3.67482e-116	1.65458e-114	ENSOARG00000006043	25:26316204-26385455	protein_coding	LRRC20	leucine rich repeat containing 20 [Source:HGNC Symbol;Acc:23421]	2.38794	4.45957	2.5629	1.03916	0.41289	0.780429	0.189445	0.262415	0.532231	4.93724	6.45827	3.88004	570.496	1.35146	3.18721	1.50902	0	-0.867053	-0.429508	-0.68692	-0.672627	-0.662932	3.89954	5.4003	2.13941	4.21103	2.31437	0.790628	0.164355	0.531894	-0.0590901	0.0138803	0.283696	4.6887	6.20973
4.31118e-116	1.93631e-114	ENSOARG00000001277	12:345250-352909	protein_coding	MYBPH	myosin binding protein H [Source:HGNC Symbol;Acc:7552]	1.53905	1.41457	1.12606	-0.34172	-0.859345	0.0168274	-0.391182	-0.317591	0.803478	0.590125	9.52166	6.48093	570.172	1.87823	1.69029	1.97644	0	-0.599165	0.130373	-0.154448	0.119891	0.937203	1.23715	9.74351	0.977354	0.852872	0.564371	-0.903413	-1.42104	-0.544865	-0.952875	-0.879284	0.241785	0.0284319	8.95997
9.49408e-116	4.25368e-114	ENSOARG00000008655	3:162844049-162856968	protein_coding	GLS2	glutaminase 2 (liver, mitochondrial) [Source:HGNC Symbol;Acc:29570]	-0.678462	-2.00718	-4.95856	-3.70084	-1.30427	-1.77925	-1.47635	-1.09429	-0.125505	6.56199	-5.04577	2.8856	568.57	2.36983	0.860538	-1.22803	0	1.58047	1.2862	1.65953	2.11924	3.19258	9.4048	-1.25963	-1.53365	-2.86238	-5.81375	-4.55603	-2.15946	-2.63444	-2.33155	-1.94948	-0.980698	5.7068	-5.90096
1.09056e-115	4.8741e-114	ENSOARG00000021191	7:78697982-78837399	protein_coding	SLC8A3	solute carrier family 8 (sodium/calcium exchanger), member 3 [Source:HGNC Symbol;Acc:11070]	-2.0073	0.0404678	-2.0083	-0.148268	0.0549106	-0.91953	-3.57867	-0.499004	-1.62971	5.25376	7.32232	4.40742	568.289	-1.61933	0.698356	-1.66295	0	0.712903	-0.729467	-2.53763	-0.181399	-1.32198	5.54448	7.49494	-3.48445	-1.43669	-3.48546	-1.62543	-1.42225	-2.39669	-5.05583	-1.97616	-3.10687	3.7766	5.84516
1.53458e-115	6.84183e-114	ENSOARG00000000287	1:101607353-101612644	protein_coding	KPRP	keratinocyte proline-rich protein [Source:HGNC Symbol;Acc:31823]	6.26154	6.70942	-0.863357	-6.07322	-6.07322	-6.07322	-6.07322	-5.31358	-6.07322	-4.67695	-6.07322	3.74388	567.596	13.8264	14.6052	6.8154	0	0.822652	0.112886	0.169697	1.6035	-0.412308	3.67877	-0.27842	4.47787	4.92575	-2.64702	-7.85689	-7.85689	-7.85689	-7.85689	-7.09725	-7.85689	-6.46062	-7.85689
4.29746e-115	1.91132e-113	ENSOARG00000017089	10:36271774-36272454	protein_coding	GJB2	Ovis aries gap junction protein, beta 2, 26kDa (GJB2), mRNA. [Source:RefSeq mRNA;Acc:NM_001009780]	4.48493	6.63893	9.5284	-3.53425	-3.15367	-3.68814	-3.57829	-4.89807	-2.05564	4.93153	-6.07322	6.62266	565.507	7.87142	8.95026	12.7529	0	-0.940871	-1.46197	0.90256	-1.20096	0.546457	8.84938	-3.93544	5.0392	7.1932	10.0827	-2.97997	-2.5994	-3.13386	-3.02401	-4.34379	-1.50137	5.48581	-5.51895
4.62655e-115	2.05268e-113	ENSOARG00000001041	JH924885.1:8578-18680	protein_coding	MUC5B	mucin 5B, oligomeric mucus/gel-forming [Source:HGNC Symbol;Acc:7516]	-6.07322	13.4837	-4.66273	-2.76948	-1.30427	-3.50234	-2.8708	-1.94873	-2.6607	1.8596	-5.04577	8.78479	565.358	-4.8647	14.7048	-2.33699	0	-0.109854	0.117861	0.50377	0.57433	1.46924	3.66516	-1.78716	-7.64805	11.9088	-6.23756	-4.34431	-2.8791	-5.07717	-4.44563	-3.52356	-4.23553	0.284768	-6.6206
5.85463e-115	2.59124e-113	ENSOARG00000020121	1:185039018-185050404	protein_coding	CSTA	cystatin A (stefin A) [Source:HGNC Symbol;Acc:2481]	5.66023	6.54929	1.93263	-6.07322	-6.07322	0.660458	-5.2769	-6.07322	-4.59047	-6.07322	-6.07322	3.50985	564.88	12.9903	13.2688	9.23218	0	-0.353567	7.46739	1.83542	-0.0320835	2.73156	0.0796594	0.0429291	7.4117	8.30076	3.6841	-4.32176	-4.32176	2.41192	-3.52543	-4.32176	-2.839	-4.32176	-4.32176
6.80566e-115	3.00487e-113	ENSOARG00000014759	20:24871703-24879389	protein_coding			2.55223	3.54969	2.70032e-05	1.14005	5.54012	1.14199	2.68136	2.55875	-1.38594	9.55864	5.98746	6.29899	564.575	0.994003	1.52423	-1.57138	0	3.51535	-0.704204	1.0825	0.997681	-3.21919	8.00883	4.38809	3.12569	4.12316	0.573494	1.71351	6.11359	1.71546	3.25483	3.13221	-0.81247	10.1321	6.56092
3.7165e-114	1.63697e-112	ENSOARG00000005924	20:26728137-26730286	protein_coding	LY6G6C	lymphocyte antigen 6 complex, locus G6C [Source:HGNC Symbol;Acc:13936]	5.15513	3.32119	-1.00866	-6.07322	-3.15367	-6.07322	-6.07322	-6.07322	-6.07322	-6.07322	-6.07322	2.31015	561.131	12.308	10.4614	6.21055	0	3.889	-0.0240253	0.0446103	-0.0244744	-0.120496	0.130687	-0.047705	6.57017	4.73623	0.406379	-4.65818	-1.73863	-4.65818	-4.65818	-4.65818	-4.65818	-4.65818	-4.65818
4.53236e-114	1.99151e-112	ENSOARG00000001556	22:14125228-14129084	protein_coding	CYP26A1	cytochrome P450, family 26, subfamily A, polypeptide 1 [Source:HGNC Symbol;Acc:2603]	-4.86796	0.854503	7.67533	-0.499349	-0.519775	-2.20461	-1.90996	-2.98189	-6.07322	1.83126	-5.03054	4.66306	560.728	-4.22841	0.501593	7.49823	0	-0.882191	-2.23549	-2.04281	-2.07622	-7.42252	1.87486	-4.46856	-5.88446	-0.161993	6.65883	-1.51585	-1.53627	-3.22111	-2.92646	-3.99839	-7.08972	0.814764	-6.04703
4.5829e-114	2.00887e-112	Addition46	1:102056053-102056265		PRD-SPRRII-like3		-6.07322	-6.07322	4.4222	-6.07322	-6.07322	-6.07322	-6.07322	-6.07322	-6.07322	-6.07322	-6.07322	1.66455	560.706	-0.0921053	0.344112	11.5271	0	0.344112	-0.0011081	0.125699	-0.0714859	-0.311702	0.452752	-0.163279	-3.83536	-3.83536	6.66007	-3.83536	-3.83536	-3.83536	-3.83536	-3.83536	-3.83536	-3.83536	-3.83536
1.37845e-113	6.02782e-112	ENSOARG00000016688	3:133198294-133212142	protein_coding	SOAT2	sterol O-acyltransferase 2 [Source:HGNC Symbol;Acc:11178]	-5.31763	-1.30509	-3.27211	0.881406	6.22801	-2.1443	-3.52293	-2.72262	-2.78377	6.81631	-3.69901	3.61233	558.471	-6.6155	-3.2232	-4.50188	0	4.33647	-3.46362	-4.87374	-3.89047	-4.35779	5.5503	-3.97571	-7.85293	-3.8404	-5.80742	-1.6539	3.6927	-4.6796	-6.05823	-5.25793	-5.31908	4.281	-6.23432
5.79619e-113	2.52855e-111	ENSOARG00000002664	JH922748.1:21-2946	protein_coding			2.49441	2.69739	4.17856	3.76932	4.00071	3.96778	4.10357	4.42852	-0.257195	8.27904	3.6419	5.2141	555.557	-1.21658	-1.17606	0.417556	0	0.128245	0.147754	0.336341	0.660449	-4.09073	4.54372	-0.133029	2.50745	2.71043	4.1916	3.78236	4.01375	3.98082	4.11661	4.44156	-0.244152	8.29208	3.65494
6.01203e-113	2.61645e-111	ENSOARG00000011606	21:44596430-44602385	protein_coding	CARNS1	carnosine synthase 1 [Source:HGNC Symbol;Acc:29268]	-4.1114	-2.54971	-4.6961	-3.72505	-6.07322	-2.61036	-2.13144	-2.28607	-4.53012	4.48106	5.01242	2.30006	555.483	-1.05317	-0.177158	-2.05513	0	-4.63654	-0.396284	0.557034	0.403845	-1.64251	7.24672	7.62749	-5.44482	-3.88313	-6.02952	-5.05848	-7.40665	-3.94379	-3.46487	-3.61949	-5.86355	3.14763	3.679
3.14583e-112	1.36582e-110	ENSOARG00000015075	17:7074126-7075193	protein_coding	MAB21L2	mab-21-like 2 (C. elegans) [Source:HGNC Symbol;Acc:6758]	-5.04372	-2.00718	-5.09255	-6.07322	3.84298	4.19207	3.84312	4.10432	-4.13819	-6.07322	-6.07322	2.58342	552.125	2.61383	4.96504	2.42112	0	10.8582	11.3436	10.9556	11.2429	3.93954	-0.0585311	0.0277592	-5.13863	-2.10209	-5.18746	-6.16813	3.74807	4.09716	3.7482	4.0094	-4.2331	-6.16813	-6.16813
2.26394e-111	9.80593e-110	ENSOARG00000003562	17:51705025-51745422	protein_coding	RILPL1	Rab interacting lysosomal protein-like 1 [Source:HGNC Symbol;Acc:26814]	3.41784	3.45029	3.3354	3.65312	2.21629	2.55518	2.11954	3.36003	3.07156	1.84343	7.87835	5.09322	548.12	-0.254154	0.00934489	-0.274003	0	-1.22598	-0.98738	-1.52694	-0.248863	-0.474514	-1.86001	4.19702	2.96261	2.99506	2.88017	3.19789	1.76106	2.09995	1.66431	2.9048	2.61633	1.3882	7.42312
8.79826e-111	3.80181e-109	ENSOARG00000006971	23:62308486-62330628	protein_coding	SERPINB10	serpin peptidase inhibitor, clade B (ovalbumin), member 10 [Source:HGNC Symbol;Acc:8942]	4.62995	5.54832	7.85192	-1.89613	-1.48938	0.958806	-2.94211	-2.31173	0.627679	-3.47691	-2.04462	5.0681	545.365	6.42137	6.8034	9.69575	0	-0.264469	2.77252	0.0807332	-0.581758	2.64776	-0.379888	-0.192958	2.19006	3.10843	5.41203	-4.33602	-3.92927	-1.48108	-5.382	-4.75162	-1.81221	-5.9168	-4.4845
1.39045e-110	5.99406e-109	ENSOARG00000015635	1:136961183-137107011	protein_coding	TMPRSS15	transmembrane protease, serine 15 [Source:HGNC Symbol;Acc:9490]	-6.07322	-6.07322	-5.36705	-5.33932	7.7184	-5.24692	-6.07322	-4.13843	-5.00357	-4.54485	-6.07322	3.10068	544.436	-1.74982	-2.88117	-0.107515	0	11.9104	-0.516736	-1.52865	1.60802	-0.0959042	0.971033	-1.41002	-7.9055	-7.9055	-7.19934	-7.1716	5.88612	-7.07921	-7.9055	-5.97071	-6.83585	-6.37713	-7.9055
2.15002e-110	9.24662e-109	ENSOARG00000019120	17:65228017-65452813	protein_coding	MYO18B	myosin XVIIIB [Source:HGNC Symbol;Acc:18150]	0.887682	-2.00718	-2.42426	-1.7465	-1.48938	-2.27044	-2.18942	-0.757721	-1.51184	-4.23098	9.49668	6.40107	543.551	1.0159	-1.37535	-2.25549	0	-0.844224	-1.39452	-2.00159	-0.542435	-0.657445	-3.70106	9.86812	-2.02956	-4.92442	-5.34151	-4.66374	-4.40662	-5.18768	-5.10666	-3.67496	-4.42908	-7.14822	6.57944
2.24798e-110	9.64515e-109	ENSOARG00000009187	14:51510292-51530222	protein_coding	CEACAM19	carcinoembryonic antigen-related cell adhesion molecule 19 [Source:HGNC Symbol;Acc:31951]	3.63509	0.973849	3.69846	-6.07322	-3.97458	-6.07322	-6.07322	-5.33913	-3.46047	-4.67695	-6.07322	1.75293	543.461	10.7525	7.99487	10.7991	0	2.87281	0.00992914	-0.0262892	1.78792	3.64614	2.82835	0.0312056	1.51076	-1.15048	1.57413	-8.19755	-6.09891	-8.19755	-8.19755	-7.46346	-5.5848	-6.80128	-8.19755
4.83941e-110	2.07152e-108	ENSOARG00000004288	3:207249726-207257835	protein_coding	RBP5	retinol binding protein 5, cellular [Source:HGNC Symbol;Acc:15847]	-6.07322	-6.07322	-6.07322	-5.33932	-1.30427	-2.34288	-1.05903	-2.05764	-6.07322	6.36971	-6.07322	2.72352	541.904	-1.68417	-2.19428	-1.69744	0	3.54797	3.4327	4.88481	4.72176	-1.36319	11.3378	-1.58006	-4.76922	-4.76922	-4.76922	-4.03531	-0.000266177	-1.03887	0.244976	-0.753631	-4.76922	7.67371	-4.76922
5.24077e-110	2.23807e-108	ENSOARG00000017295	7:10160966-10294429	protein_coding	HOMER1	homer homolog 1 (Drosophila) [Source:HGNC Symbol;Acc:17512]	3.66928	3.24017	1.8856	3.46379	3.95154	3.13703	2.98503	2.59128	5.27718	6.0564	7.64629	5.22142	541.742	0.183683	-0.390355	-1.61235	0	0.321455	-0.499109	-0.520436	-0.883757	1.63704	2.60521	4.13127	2.69843	2.26932	0.914745	2.49294	2.98069	2.16618	2.01417	1.62043	4.30633	5.08554	6.67544
1.05953e-109	4.51414e-108	ENSOARG00000019611	3:35840677-35897004	protein_coding	CLIP4	CAP-GLY domain containing linker protein family, member 4 [Source:HGNC Symbol;Acc:26108]	6.07547	6.00763	4.72933	1.97414	1.29444	0.58924	1.16323	0.69609	2.74772	-0.73079	5.9189	4.47344	540.314	4.11575	3.9729	2.7548	0	-0.744493	-1.39273	-0.714584	-1.23762	0.783206	-2.7065	3.95492	4.98462	4.91677	3.63848	0.883288	0.203583	-0.501613	0.0723737	-0.394764	1.65687	-1.82164	4.82805
1.37416e-109	5.84098e-108	ENSOARG00000016766	17:71609938-71618648	protein_coding	P2RX6	purinergic receptor P2X, ligand-gated ion channel, 6 [Source:HGNC Symbol;Acc:8538]	-4.28743	-6.07322	-6.07322	-4.19778	-2.63371	-4.51444	-5.2769	-2.94532	-4.94983	-6.07322	4.62703	1.11875	539.786	-0.362897	-3.49652	-3.43648	0	0.874929	-1.25009	-1.63421	0.746162	-1.31499	-3.38411	8.27602	-4.55407	-6.33986	-6.33986	-4.46442	-2.90035	-4.78107	-5.54353	-3.21196	-5.21646	-6.33986	4.3604
4.32398e-109	1.83367e-107	ENSOARG00000020029	1:184374043-184390660	protein_coding	FBXO40	F-box protein 40 [Source:HGNC Symbol;Acc:29816]	-2.34383	-0.834869	-4.69326	-2.77691	-2.63371	-3.42323	-2.95136	-1.35691	-1.04473	0.157388	7.86766	4.73612	537.459	0.768086	2.39243	-1.23639	0	0.544759	-0.170923	-0.130591	1.81469	1.34976	3.89815	10.7576	-3.61166	-2.1027	-5.9611	-4.04475	-3.90154	-4.69106	-4.21919	-2.62474	-2.31257	-1.11045	6.59983
6.07117e-109	2.56863e-107	ENSOARG00000020919	3:203756536-203779296	protein_coding	YBX3	Y box binding protein 3 [Source:HGNC Symbol;Acc:2428]	5.6034	5.04421	5.36473	3.97603	3.50169	3.89244	3.42784	4.28421	3.61259	2.8543	8.98996	6.29348	536.77	1.5515	1.16184	1.35357	0	-0.381298	-0.0975157	-0.623728	0.277715	-0.386771	-1.13582	4.94748	5.77477	5.21557	5.53609	4.14739	3.67306	4.06381	3.59921	4.45558	3.78396	3.02567	9.16133
1.16447e-108	4.91529e-107	ENSOARG00000008997	21:42295599-42307126	protein_coding	PYGM	Ovis aries phosphorylase, glycogen, muscle (PYGM), mRNA. [Source:RefSeq mRNA;Acc:NM_001009192]	0.623152	-0.331807	3.10852	3.1218	2.36024	3.21132	2.38993	3.08768	3.32622	0.477741	12.9804	9.91527	535.447	-2.68661	-3.67115	0.271016	0	-0.967642	0.179573	-0.934638	0.0152352	0.351415	-2.97936	9.82603	-0.715415	-1.67037	1.76995	1.78323	1.02168	1.87275	1.05136	1.74911	1.98765	-0.860826	11.6418
1.53023e-108	6.4443e-107	ENSOARG00000010816	24:32523290-32571028	protein_coding			1.72573	1.3276	1.27448	1.39272	1.04456	1.07242	0.788532	0.641809	-0.21416	-0.18513	6.04651	3.11794	534.893	0.334215	0.027962	-0.112072	0	-0.25601	-0.361358	-0.620319	-0.743999	-1.64516	-1.50703	4.61871	1.6775	1.27937	1.22624	1.34449	0.996324	1.02419	0.740296	0.593573	-0.262396	-0.233366	5.99827
2.95606e-108	1.24202e-106	ENSOARG00000005150	23:56899159-56944691	protein_coding	ONECUT2	one cut homeobox 2 [Source:HGNC Symbol;Acc:8139]	-4.29694	-6.07322	-5.36705	-5.33932	4.6925	-4.87186	-5.51486	-6.07322	-6.07322	5.6446	-6.07322	2.22798	533.556	1.35538	-2.33341	-0.0606344	0	9.4319	0.87765	-0.11863	-1.72318	-1.61781	10.6061	-1.54532	-4.4475	-6.22378	-5.51761	-5.48988	4.54194	-5.02242	-5.66542	-6.22378	-6.22378	5.49404	-6.22378
5.27662e-108	2.21194e-106	ENSOARG00000005428	3:207527997-207529618	protein_coding	TPI1	triosephosphate isomerase 1 [Source:HGNC Symbol;Acc:12009]	5.2165	5.58393	6.15595	5.70542	5.73762	5.527	5.33567	5.52511	4.64176	6.20105	10.1007	7.45394	532.38	-0.507364	-0.291606	0.447688	0	-0.137899	-0.346218	-0.383682	-0.182859	-1.22737	0.545909	4.39574	5.84913	6.21656	6.78858	6.33805	6.37025	6.15963	5.9683	6.15774	5.27439	6.83368	10.7333
7.44275e-108	3.11281e-106	ENSOARG00000007311	25:28801109-28826985	protein_coding	OIT3	oncoprotein induced transcript 3 [Source:HGNC Symbol;Acc:29953]	-4.86102	-0.834869	-2.87019	-3.63527	-3.15367	-2.95331	-2.98889	-3.28557	4.26217	7.38279	-3.98737	3.82713	531.681	-0.935182	2.05332	0.192808	0	-0.344875	0.166313	0.393356	0.737857	7.34892	10.4568	1.19544	-5.57559	-1.54944	-3.58477	-4.34985	-3.86824	-3.66788	-3.70346	-4.00014	3.5476	6.66821	-4.70194
9.76023e-108	4.07272e-106	ENSOARG00000004321	21:41629235-41631998	protein_coding			1.00375	0.724387	0.893488	0.652412	0.0549106	-1.15383	-0.702439	0.20619	-2.72696	2.48035	5.84877	2.88405	531.131	0.294129	-0.165761	0.180486	0	-0.839089	-2.08346	-1.14628	-0.464414	-3.24409	1.88456	5.13736	2.21465	1.93528	2.10438	1.86331	1.26581	0.0570664	0.508458	1.41709	-1.51606	3.69125	7.05967
1.04273e-107	4.34114e-106	ENSOARG00000018723	5:6097925-6123274	protein_coding	TMEM38A	transmembrane protein 38A [Source:HGNC Symbol;Acc:28462]	0.316056	0.145894	1.74409	1.69578	0.41289	1.50923	0.619943	1.44834	1.93914	-0.930412	7.15913	4.16166	530.997	-1.3897	-1.16277	0.170655	0	-0.894128	0.0928485	-1.16328	-0.295847	0.531085	-2.80598	5.56952	0.32619	0.156028	1.75422	1.70592	0.423024	1.51936	0.630077	1.45848	1.94928	-0.920278	7.16926
1.68551e-107	7.00119e-106	ENSOARG00000017585	7:11269380-11320324	protein_coding	ERO1L	ERO1-like (S. cerevisiae) [Source:HGNC Symbol;Acc:13280]	3.66364	6.72864	7.69387	4.05662	3.64353	3.54405	3.7492	3.76131	3.78416	4.78788	2.82595	5.34947	530.021	-0.392579	2.63112	3.65112	0	-0.454736	-0.558603	-0.293679	-0.298495	-0.297715	0.751067	-1.221	3.16181	6.22681	7.19205	3.5548	3.14171	3.04223	3.24738	3.25949	3.28233	4.28605	2.32413
1.69669e-107	7.03162e-106	ENSOARG00000000330	1:101772589-101777128	protein_coding	IVL	involucrin [Source:HGNC Symbol;Acc:6187]	6.25173	8.92086	9.31469	-3.18251	-6.07322	-6.07322	-4.42705	-6.07322	-5.00357	-4.54485	-6.07322	6.82079	530.008	8.68819	10.2004	11.3445	0	-5.79362	-5.71278	-1.15014	-5.27064	-3.46867	-2.27785	-5.14478	5.62693	8.29605	8.68989	-3.80731	-6.69803	-6.69803	-5.05185	-6.69803	-5.62837	-5.16965	-6.69803
2.47575e-107	1.0237e-105	ENSOARG00000005992	14:48086970-48092858	protein_coding	NCCRP1	non-specific cytotoxic cell receptor protein 1 homolog (zebrafish) [Source:HGNC Symbol;Acc:33739]	3.21296	5.89116	1.72097	-5.38472	-6.07322	-6.07322	-5.09915	-6.07322	-6.07322	-4.54485	-6.07322	1.95478	529.241	8.51116	10.9113	7.06148	0	-2.0529	-1.96139	1.15284	-1.79434	-1.85031	1.05587	-1.73068	1.76459	4.44278	0.272595	-6.83309	-7.52159	-7.52159	-6.54752	-7.52159	-7.52159	-5.99322	-7.52159
3.18959e-107	1.31589e-105	ENSOARG00000005080	14:45629036-45647892	protein_coding	PRODH2	proline dehydrogenase (oxidase) 2 [Source:HGNC Symbol;Acc:17325]	-4.1209	-1.61384	-5.3689	-4.27849	-3.97458	-5.24692	-6.07322	-5.31358	-6.07322	5.84403	-4.41867	2.25818	528.726	0.21735	1.61084	-1.49981	0	-0.895825	-1.57317	-3.07395	-1.39982	-3.47586	9.76538	0.668053	-6.61583	-4.10877	-7.86383	-6.77342	-6.46951	-7.74185	-8.56815	-7.80851	-8.56815	3.3491	-6.9136
5.89876e-107	2.42808e-105	ENSOARG00000016423	22:35829080-35869672	protein_coding	PNLIPRP3	pancreatic lipase-related protein 3 [Source:HGNC Symbol;Acc:23492]	1.22648	5.93594	4.04636	-5.11256	-6.07322	-6.07322	-5.12906	-4.30869	-4.0739	-3.14857	-6.07322	2.26761	527.478	5.72714	10.7216	8.61359	0	-2.28744	-2.60416	-0.761822	0.338427	0.943756	1.61246	-2.76459	0.706435	5.4159	3.52632	-5.6326	-6.59327	-6.59327	-5.6491	-4.82873	-4.59394	-3.66862	-6.59327
6.1662e-107	2.53245e-105	ENSOARG00000000697	JH922959.1:17616-26464	protein_coding	TNNT3	troponin T type 3 (skeletal, fast) [Source:HGNC Symbol;Acc:11950]	-1.14642	-3.42941	2.20776	-0.212966	-1.14024	-1.33563	-1.65327	-0.359424	-1.5901	-3.14857	11.6493	8.64724	527.388	-1.16419	-3.27378	2.12717	0	-0.888116	-1.32075	-0.706313	-0.0113616	-0.813933	-3.40577	11.7641	-3.46053	-5.74353	-0.10636	-2.52708	-3.45436	-3.64975	-3.96739	-2.67354	-3.90422	-5.46269	9.33516
1.13875e-106	4.6663e-105	ENSOARG00000006471	23:25963537-25996637	protein_coding	DSG3	desmoglein 3 [Source:HGNC Symbol;Acc:3050]	7.20692	9.78705	11.5769	-1.88905	-3.15367	-4.87186	-1.01344	-5.06111	0.659533	-1.29935	-6.07322	8.70085	526.142	7.82895	9.67821	12.1833	0	-3.36114	-4.11367	0.424469	-4.0484	1.36513	-1.13444	-6.51017	5.23019	7.81032	9.60013	-3.86578	-5.1304	-6.84859	-2.99017	-7.03784	-1.3172	-3.27608	-8.04995
1.93326e-106	7.90424e-105	ENSOARG00000015588	3:19737455-19795960	protein_coding	ATP6V1C2	ATPase, H+ transporting, lysosomal 42kDa, V1 subunit C2 [Source:HGNC Symbol;Acc:18264]	5.89479	1.23506	4.31892	-1.30173	-2.2523	-4.44351	-4.31925	-3.72704	-1.94605	-3.95745	-1.7396	3.45973	525.067	6.5164	1.3029	4.92044	0	-2.23188	-3.22225	-3.35003	-2.66264	-1.65772	-1.87765	-0.960343	5.50522	0.845497	3.92935	-1.6913	-2.64187	-4.83308	-4.70882	-4.11661	-2.33561	-4.34701	-2.12917
3.23213e-106	1.31852e-104	ENSOARG00000009654	18:53953811-53979745	protein_coding	TGM5	transglutaminase 5 [Source:HGNC Symbol;Acc:11781]	5.26281	-0.0732743	4.88137	-2.94677	-6.07322	0.111188	-0.418102	-3.85199	-4.32945	-4.67695	-6.07322	3.25092	524.023	8.29025	2.34668	7.86597	0	-4.64195	2.84638	2.76472	-0.119725	-0.931017	-1.20586	-4.07882	4.16588	-1.17021	3.78443	-4.0437	-7.17016	-0.985748	-1.51504	-4.94893	-5.42638	-5.77389	-7.17016
4.00429e-106	1.62987e-104	Addition28	1:101684202-101684474		LCE1-like4		4.22463	-6.07322	-6.07322	-6.07322	-6.07322	-6.07322	-6.07322	-5.31358	-6.07322	-6.07322	-6.07322	1.40984	523.588	11.4397	0.413554	0.0366269	0	0.413554	0.423486	-0.129217	1.87266	0.434675	-0.16041	-0.0163069	6.10296	-4.1949	-4.1949	-4.1949	-4.1949	-4.1949	-4.1949	-3.43526	-4.1949	-4.1949	-4.1949
4.37332e-106	1.77611e-104	ENSOARG00000009785	14:52023707-52032525	protein_coding	CKM	creatine kinase, muscle [Source:HGNC Symbol;Acc:1994]	0.285045	0.790911	2.14672	1.93768	-0.519775	-0.17104	1.27666	1.36472	-0.837071	-6.07322	14.1261	11.1132	523.409	-1.49885	-1.09285	-0.154931	0	-2.41277	-2.17086	-0.27697	-0.781805	-2.81327	-9.61327	12.0592	0.0450358	0.550902	1.90671	1.69767	-0.759784	-0.411049	1.03665	1.12471	-1.07708	-6.31323	13.8861
8.38867e-106	3.39927e-104	ENSOARG00000011075	12:35526269-35536270	protein_coding	SELE	Ovis aries selectin E (SELE), mRNA. [Source:RefSeq mRNA;Acc:NM_001009749]	4.02443	-2.00718	-6.07322	-6.07322	-6.07322	-4.87186	-5.2769	-5.06111	-3.88017	-3.95745	-4.72552	1.41471	522.086	11.3977	5.83671	0.0589718	0	0.814395	3.69729	1.65974	2.5592	3.82899	4.03825	3.82026	3.42226	-2.60935	-6.67539	-6.67539	-6.67539	-5.47403	-5.87907	-5.66328	-4.48234	-4.55962	-5.3277
1.10739e-105	4.47743e-104	ENSOARG00000020928	7:54604253-54635985	protein_coding	ONECUT1	one cut homeobox 1 [Source:HGNC Symbol;Acc:8138]	-6.07322	-6.07322	-5.3689	-4.95026	-6.07322	-6.07322	-6.07322	-5.31358	-6.07322	5.48995	-6.07322	1.67921	521.522	-2.66418	-1.59225	-1.02972	0	-1.59225	-2.45589	-2.21047	-0.895107	-3.0589	11.2399	-2.81437	-6.83451	-6.83451	-6.13018	-5.71154	-6.83451	-6.83451	-6.83451	-6.07487	-6.83451	4.72866	-6.83451
1.12543e-105	4.54031e-104	ENSOARG00000002301	JH924291.1:85-1615	protein_coding			-6.07322	-6.07322	-6.07322	-6.07322	-0.330975	-6.07322	-6.07322	-5.34937	5.17357	-4.08955	-6.07322	2.16082	521.49	0.0490537	-1.10558	0.0631759	0	5.62313	-0.806431	0.162017	1.73391	12.3912	3.48676	0.390964	-5.24955	-5.24955	-5.24955	-5.24955	0.492702	-5.24955	-5.24955	-4.5257	5.99725	-3.26587	-5.24955
1.25374e-105	5.0468e-104	ENSOARG00000018548	11:33875018-33889391	protein_coding	SHMT1	Ovis aries serine hydroxymethyltransferase 1 (soluble) (SHMT1), nuclear gene encoding mitochondrial protein, mRNA. [Source:RefSeq mRNA;Acc:NM_001009469]	3.18176	2.95117	5.08235	0.311523	3.07064	2.68963	3.5354	3.01764	-0.746673	8.10866	1.02553	4.93584	521.27	2.8785	2.22999	4.78351	0	2.34957	2.30609	3.22034	2.92269	-1.1899	7.68962	0.717219	2.56541	2.33481	4.46599	-0.304834	2.45428	2.07327	2.91905	2.40128	-1.36303	7.49231	0.409172
3.31189e-105	1.33023e-103	ENSOARG00000011789	12:52956347-52968507	protein_coding	PRDX6	Peroxiredoxin 6 [Source:UniProtKB/TrEMBL;Acc:M4T8F1]	5.94229	8.06354	11.4184	4.99795	4.51312	5.98024	6.06358	6.01308	5.98844	6.4645	6.70839	8.66524	519.297	0.95659	2.85351	6.46582	0	-0.697333	0.899323	1.06159	1.05835	0.898402	1.4951	1.71002	6.49022	8.61147	11.9663	5.54589	5.06105	6.52817	6.61151	6.56102	6.53637	7.01243	7.25632
5.37971e-105	2.15602e-103	ENSOARG00000007271	3:81285872-81299658	protein_coding	HAAO	3-hydroxyanthranilate 3,4-dioxygenase [Source:HGNC Symbol;Acc:4796]	-1.11959	-0.647009	-1.49277	-0.0718356	-0.0873097	0.687249	0.363724	-0.0962437	0.562132	7.15049	-4.42369	3.53594	518.312	-0.779132	-0.597463	-1.29575	0	-0.0323159	0.785069	0.457307	-0.0701696	0.642366	7.20917	-2.43237	-0.972387	-0.499807	-1.34557	0.0753665	0.0598924	0.834452	0.510926	0.0509584	0.709334	7.29769	-4.27649
5.67834e-105	2.27071e-103	ENSOARG00000015384	19:56260482-56275105	protein_coding	TMEM40	transmembrane protein 40 [Source:HGNC Symbol;Acc:25620]	2.24588	3.37639	4.14274	-5.38472	-6.07322	-6.07322	-5.2769	-4.33726	-6.07322	-6.07322	-0.723327	1.80066	518.202	7.51811	8.56875	9.4287	0	-1.87983	-1.91368	0.00819783	1.24823	-1.95118	-1.70382	4.53877	2.73188	3.86239	4.62874	-4.89871	-5.58722	-5.58722	-4.79089	-3.85126	-5.58722	-5.58722	-0.237323
1.45521e-104	5.80653e-103	ENSOARG00000019545	1:87788905-87811255	protein_coding	CHIA	Acidic chitinase [Source:UniProtKB/TrEMBL;Acc:A5H457]	-4.29876	-6.07322	-6.07322	-3.92417	-1.70178	-6.07322	-2.93811	-4.16222	-6.07322	5.94323	-6.07322	2.21128	516.291	-0.622948	-4.09079	-3.69239	0	1.24537	-3.92204	0.442081	-0.292604	-3.7049	9.13837	-3.60614	-4.80364	-6.5781	-6.5781	-4.42905	-2.20665	-6.5781	-3.44298	-4.6671	-6.5781	5.43835	-6.5781
1.62117e-104	6.4546e-103	ENSOARG00000001604	17:55390114-55392218	protein_coding	TMEM233	transmembrane protein 233 [Source:HGNC Symbol;Acc:37219]	-6.07322	-6.07322	-6.07322	-6.07322	-6.07322	-6.07322	-6.07322	-6.07322	-6.07322	-6.07322	4.12945	0.465063	516.071	0.0123347	-0.40725	0.0157749	0	-0.40725	-0.279023	0.0466002	-0.00120214	-0.121248	-0.0740552	11.2458	-3.95919	-3.95919	-3.95919	-3.95919	-3.95919	-3.95919	-3.95919	-3.95919	-3.95919	-3.95919	6.24349
1.872e-104	7.43703e-103	ENSOARG00000014318	14:56008883-56014069	protein_coding	KLK7	kallikrein-related peptidase 7 [Source:HGNC Symbol;Acc:6368]	4.93153	-6.07322	-3.21221	-6.07322	-3.97458	-6.07322	-6.07322	-5.31358	-6.07322	-6.07322	-6.07322	2.3218	515.779	12.2799	-0.853341	4.88606	0	2.06621	-0.678621	0.205477	1.80123	-0.456989	-0.0173965	0.193157	4.11923	-6.88552	-4.02451	-6.88552	-4.78687	-6.88552	-6.88552	-6.12588	-6.88552	-6.88552	-6.88552
2.11045e-104	8.36609e-103	ENSOARG00000015784	11:40867642-40935321	protein_coding	KRTAP4-7-like	LOC101113420/keratin-associated protein 4-7-like	3.76243	-6.07322	-5.09463	-6.07322	-6.07322	-6.07322	-6.07322	-6.07322	-6.07322	-6.07322	-6.07322	1.67869	515.535	11.5038	-0.577995	2.29232	0	-0.577995	-0.629564	0.354482	-0.116507	-0.685123	0.486845	-0.0204233	3.90803	-5.92762	-4.94903	-5.92762	-5.92762	-5.92762	-5.92762	-5.92762	-5.92762	-5.92762	-5.92762
3.48935e-104	1.38022e-102	ENSOARG00000004143	24:26218820-26227471	protein_coding	ALDOA	aldolase A, fructose-bisphosphate [Source:HGNC Symbol;Acc:414]	6.89021	7.03087	7.81178	7.20471	6.71147	7.23946	7.18583	7.46431	5.72389	5.91984	13.7269	10.7478	514.514	-0.307817	-0.277322	0.631379	0	-0.596744	-0.0357351	0.00292242	0.296321	-1.55499	-1.20612	6.53397	4.75009	4.89075	5.67166	5.06458	4.57135	5.09934	5.04571	5.32418	3.58377	3.77971	11.5868
4.02139e-104	1.58723e-102	ENSOARG00000007268	11:28953967-28981097	protein_coding	MYH8	myosin, heavy chain 8, skeletal muscle, perinatal [Source:HGNC Symbol;Acc:7578]	-2.91721	2.07901	-2.46338	-3.30392	-3.97458	-3.68814	-4.06867	-2.74222	-3.46707	-6.07322	10.5904	7.47189	514.226	-0.90352	5.07249	0.680265	0	-1.15765	-1.25105	-0.532913	-0.842028	-0.839658	-5.88218	12.7904	-5.45376	-0.45754	-4.99993	-5.84047	-6.51113	-6.22469	-6.60523	-5.27877	-6.00362	-8.60977	8.05387
4.56661e-104	1.79854e-102	ENSOARG00000008148	1:252763172-252806777	protein_coding	KY	kyphoscoliosis peptidase [Source:HGNC Symbol;Acc:26576]	0.281653	0.973849	-4.8322	-2.96351	-1.30427	-0.0695327	-1.92802	-3.65638	-4.59047	-3.95745	5.7236	2.54206	513.967	3.35891	4.019	-1.05147	0	1.71964	3.06428	0.979314	-0.114972	-0.941582	-0.0964813	8.65346	-0.606652	0.0855443	-5.72051	-3.85181	-2.19258	-0.957838	-2.81632	-4.54469	-5.47877	-4.84575	4.8353
5.13539e-104	2.01819e-102	ENSOARG00000016853	3:133471252-133477730	protein_coding	KRT3	keratin 3 [Source:HGNC Symbol;Acc:6440]	0.893385	6.00062	4.24157	-5.33932	-6.07322	-6.07322	-3.48929	-5.07261	-6.07322	-4.54485	-6.07322	2.62142	513.729	6.27893	11.0526	9.84123	0	-2.02107	-2.1208	1.77174	0.685804	-2.22468	1.43663	-1.8385	-0.516956	4.59027	2.83123	-6.74966	-7.48356	-7.48356	-4.89963	-6.48296	-7.48356	-5.95519	-7.48356
5.75769e-104	2.25788e-102	ENSOARG00000020481	1:196244863-196384031	protein_coding	TPRG1	tumor protein p63 regulated 1 [Source:HGNC Symbol;Acc:24759]	4.00186	5.09116	5.32867	-1.5904	-6.07322	-3.06756	-3.31152	-3.1683	-4.32945	-0.750853	-0.155045	3.16695	513.497	5.58269	6.3192	6.85593	0	-5.84487	-1.92027	-1.90393	-1.46394	-2.23414	0.661641	1.27356	3.13792	4.22722	4.46474	-2.45434	-6.93716	-3.9315	-4.17546	-4.03223	-5.19338	-1.61479	-1.01898
9.66671e-104	3.78267e-102	ENSOARG00000013125	3:99384260-99410421	protein_coding	IL1RL2	interleukin 1 receptor-like 2 [Source:HGNC Symbol;Acc:5999]	2.52254	2.67994	4.71951	-6.07322	-3.97458	-6.07322	-4.83073	-5.33913	-6.07322	-4.67695	-6.07322	2.17096	512.444	9.6749	9.70001	11.836	0	2.86807	-0.0549291	2.63171	1.77698	-0.0587911	2.93766	0.000603117	1.62724	1.78464	3.82421	-6.96853	-4.86988	-6.96853	-5.72603	-6.23444	-6.96853	-5.57225	-6.96853
1.48145e-103	5.78464e-102	ENSOARG00000007894	3:207818504-207822814	protein_coding	GAPDH	Ovis aries glyceraldehyde-3-phosphate dehydrogenase (GAPDH), mRNA. [Source:RefSeq mRNA;Acc:NM_001190390]	5.97472	6.69863	7.16573	6.15157	6.23175	6.43215	5.99246	5.97069	5.53386	6.80496	11.4001	8.6355	511.577	-0.152157	0.278427	1.0277	0	-0.188485	0.114087	-0.157805	-0.178384	-0.787165	0.702593	5.25313	5.75315	6.47706	6.94416	5.93	6.01019	6.21058	5.77089	5.74912	5.31229	6.58339	11.1785
1.54768e-103	6.03033e-102	ENSOARG00000005476	23:57817552-57942973	protein_coding	ALPK2	alpha-kinase 2 [Source:HGNC Symbol;Acc:20565]	-0.894771	-2.54971	-0.115688	-0.814146	-0.859345	-2.05688	-2.24083	-1.33715	0.160274	-1.49897	6.80951	3.66389	511.488	-0.265238	-1.41471	0.84	0	0.320221	-1.23555	-1.67743	-0.0267178	0.981271	-0.742458	7.4694	-3.58161	-5.23655	-2.80252	-3.50098	-3.54618	-4.74371	-4.92766	-4.02399	-2.52656	-4.18581	4.12267
1.95943e-103	7.61839e-102	ENSOARG00000018377	14:23560430-23562844	protein_coding	MT4	metallothionein 4 [Source:HGNC Symbol;Acc:18705]	3.18761	-6.07322	-6.07322	-6.07322	-6.07322	-6.07322	-6.07322	-6.07322	-6.07322	-6.07322	-6.07322	1.73859	511.008	11.4873	-0.452168	-0.113004	0	-0.452168	-0.59568	0.397597	-0.138288	-0.741536	0.693789	-0.0913116	5.63769	-3.62314	-3.62314	-3.62314	-3.62314	-3.62314	-3.62314	-3.62314	-3.62314	-3.62314	-3.62314
1.66417e-102	6.45661e-101	ENSOARG00000000645	11:24702544-24715194	protein_coding	SMTNL2	smoothelin-like 2 [Source:HGNC Symbol;Acc:24764]	1.3567	2.05214	1.11001	1.30329	-1.30427	0.00750831	-0.264766	0.875947	-2.33012	0.950772	7.41596	4.36368	506.662	-0.153673	0.576244	-0.455844	0	-2.80428	-1.62605	-1.64709	-0.424788	-3.99365	-0.475452	5.89503	1.26991	1.96535	1.02322	1.21651	-1.39106	-0.0792755	-0.35155	0.789163	-2.4169	0.863988	7.32918
1.92049e-102	7.43528e-101	ENSOARG00000022165	3:205850371-205850433	miRNA			-6.07322	0.0404678	4.13796	-6.07322	-6.07322	-4.62635	-6.07322	-6.07322	-6.07322	-6.07322	-6.07322	1.30578	506.371	-0.0300268	6.8929	11.2141	0	-0.210339	3.15113	0.0878748	-0.0313274	-0.222056	0.108874	0.00622619	-2.08472	4.02897	8.12647	-2.08472	-2.08472	-0.637844	-2.08472	-2.08472	-2.08472	-2.08472	-2.08472
5.35921e-102	2.07045e-100	ENSOARG00000014074	17:70787176-70813746	protein_coding	UPB1	ureidopropionase, beta [Source:HGNC Symbol;Acc:16297]	-3.98282	-1.61384	-6.07322	-2.45282	0.18436	-4.05724	-3.34934	-4.61528	-2.59509	7.51526	-6.07322	3.88285	504.285	-1.12381	0.380195	-4.83991	0	2.20211	-1.64762	0.417448	-2.30659	-0.429636	9.74462	-4.80034	-4.19071	-1.82173	-6.28112	-2.66072	-0.0235324	-4.26513	-3.55723	-4.82318	-2.80298	7.30736	-6.28112
1.16436e-101	4.48883e-100	ENSOARG00000003592	2:138990254-139154704	protein_coding	LRP2	low density lipoprotein receptor-related protein 2 [Source:HGNC Symbol;Acc:6694]	8.23971	5.46419	-1.63935	-1.2021	-0.0873097	-0.866409	-1.13447	-1.11503	-2.33149	0.0788636	-0.479504	5.27784	502.709	8.71827	6.192	-0.501873	0	0.629324	-0.00637638	-0.597324	-0.296099	-1.75589	0.866458	0.0675013	4.00689	1.23137	-5.87216	-5.43492	-4.32012	-5.09922	-5.36729	-5.34784	-6.56431	-4.15395	-4.71232
1.26754e-101	4.87629e-100	ENSOARG00000005438	5:2379625-2595327	protein_coding			0.244562	-0.196757	-0.0600409	-2.69564	-0.624329	-4.62635	-2.34898	-1.06653	-0.521672	1.64202	12.3279	9.21328	502.536	1.80897	2.30196	1.55441	0	1.8701	-1.5188	0.235651	0.37336	1.48519	2.98465	14.0251	-4.14611	-4.58742	-4.45071	-7.08631	-5.015	-9.01702	-6.73965	-5.4572	-4.91234	-2.74865	7.93726
2.94583e-101	1.13089e-99	ENSOARG00000009923	9:29078217-29089617	protein_coding	KLHL38	kelch-like family member 38 [Source:HGNC Symbol;Acc:34435]	1.11898	0.504154	-0.372906	0.175498	-3.15367	0.084687	-0.604534	0.223538	0.44091	-0.855739	7.58609	4.48577	500.822	0.801834	1.03089	-0.462038	0	-2.718	0.0695093	-0.854884	0.23484	0.42766	-1.25873	7.32171	0.0847637	-0.530061	-1.40712	-0.858717	-4.18789	-0.949529	-1.63875	-0.810678	-0.593306	-1.88995	6.55187
4.45151e-101	1.70532e-99	ENSOARG00000000259	1:101553559-101556549	protein_coding	C1orf68	chromosome 1 open reading frame 68 [Source:HGNC Symbol;Acc:29468]	4.15388	-6.07322	-6.07322	-5.33932	-6.07322	-6.07322	-6.07322	-6.07322	-5.00357	-6.07322	-6.07322	1.48861	499.983	9.6723	-1.52573	-1.78636	0	-1.52573	-1.37736	-2.03886	-1.77481	0.966077	-2.15145	-1.82181	3.019	-7.2081	-7.2081	-6.4742	-7.2081	-7.2081	-7.2081	-7.2081	-6.13845	-7.2081	-7.2081
5.36412e-101	2.05062e-99	ENSOARG00000001623	JH922897.1:21-13396	protein_coding			4.30686	-3.42941	-4.6961	-4.65081	-3.97458	-6.07322	-5.26342	-5.31358	-3.46707	-4.54485	-5.04577	1.76067	499.604	9.14827	0.534611	-0.00423026	0	-0.0693497	-2.7445	-0.155494	-0.639047	1.18737	0.0925795	0.413841	2.69333	-5.04294	-6.30963	-6.26434	-5.58811	-7.68675	-6.87695	-6.92712	-5.0806	-6.15838	-6.6593
1.09115e-100	4.16258e-99	ENSOARG00000014051	21:44780244-44784539	protein_coding	ALDH3B2	aldehyde dehydrogenase 3 family, member B2 [Source:HGNC Symbol;Acc:411]	5.19551	0.724387	-1.32875	-0.733338	-0.330975	-0.984606	-0.521698	0.203135	-1.11943	-1.29935	-1.68762	2.42415	498.161	5.60981	0.374287	-0.951789	0	-0.688115	-0.848441	-0.111078	0.633941	-0.954151	-1.05417	-1.1435	4.45912	-0.0120015	-2.06514	-1.46973	-1.06736	-1.72099	-1.25809	-0.533253	-1.85582	-2.03574	-2.42401
1.97209e-100	7.50752e-99	ENSOARG00000010000	11:26480695-26491111	protein_coding	ASGR2	asialoglycoprotein receptor 2 [Source:HGNC Symbol;Acc:743]	-3.53579	-1.30509	0.347648	1.78629	3.25877	3.11791	3.2688	2.56378	2.26667	8.62806	-3.69807	5.10412	496.958	-5.10675	-3.7418	-1.91075	0	0.847658	0.462114	0.993026	0.395894	-0.3733	6.66475	-5.21571	-3.74243	-1.51173	0.141005	1.57965	3.05212	2.91127	3.06216	2.35714	2.06002	8.42141	-3.90471
5.443e-100	2.06777e-98	ENSOARG00000003579	1:103864996-103873039	protein_coding			4.70914	2.41054	3.40434	-1.70763	-0.164048	-0.839656	-0.776864	-0.541342	-1.98698	-6.07322	-6.07322	2.36947	494.894	6.50922	3.62925	5.17492	0	1.04462	0.829799	0.949019	1.2987	-0.472516	-5.40469	-5.25785	4.24552	1.94692	2.94072	-2.17126	-0.627671	-1.30328	-1.24049	-1.00496	-2.4506	-6.53684	-6.53684
5.50431e-100	2.08672e-98	ENSOARG00000002814	19:51797209-51800540	protein_coding			4.88817	4.57261	5.52883	4.69671	4.32938	4.59259	4.02132	4.69762	4.4487	3.79088	9.85918	7.04957	494.872	-0.00527347	-0.210657	0.624176	0	-0.453964	-0.172495	-0.879566	-0.18198	-0.316715	-1.17694	5.0394	3.1736	2.85803	3.81425	2.98214	2.61481	2.87801	2.30674	2.98305	2.73413	2.07631	8.14461
1.50994e-99	5.71241e-98	ENSOARG00000005973	20:26735300-26736624	protein_coding			4.88418	3.94979	1.47032	-5.23916	-6.07322	-6.07322	-5.12906	-6.07322	-6.07322	-4.54485	-6.07322	2.32732	492.82	10.361	9.61847	6.78388	0	-1.40384	-1.59632	-0.014997	-1.81616	-1.7851	1.29059	-1.8964	5.95212	5.01772	2.53826	-4.17122	-5.00528	-5.00528	-4.06112	-5.00528	-5.00528	-3.47691	-5.00528
2.10815e-99	7.95904e-98	ENSOARG00000022728	12:72034182-72034289	miRNA			4.5401	2.5322	3.60119	-4.55065	-3.97458	-0.769084	-0.803021	-5.06111	-5.00357	-6.07322	-6.07322	2.28871	492.142	9.06206	7.09463	8.15499	0	0.410606	3.63028	3.83749	-0.029128	-0.438425	-2.50165	-2.6085	7.751	5.7431	6.81209	-1.33975	-0.763684	2.44181	2.40788	-1.85021	-1.79267	-2.86233	-2.86233
2.6245e-99	9.88798e-98	Addition36	1:101867217-101868986		SPRR1A		8.26408	9.88143	10.0253	-3.12789	-3.97458	-6.07322	-3.23127	-5.33913	-3.46707	-4.67695	-6.07322	7.67169	491.696	10.8508	11.3663	12.2008	0	-2.66874	-5.3818	0.866527	-3.16504	-1.55603	-2.19524	-4.85046	7.44115	9.05849	9.20239	-3.95082	-4.79752	-6.89616	-4.0542	-6.16207	-4.29	-5.49988	-6.89616
7.17681e-99	2.69833e-97	ENSOARG00000018733	1:80058796-80105757	protein_coding		Alpha amylase isoform 2 [Source:UniProtKB/TrEMBL;Acc:Q6JKS7]	-3.71466	-2.54971	-2.51292	-4.62982	-3.97458	-3.31308	-4.08324	-2.32007	-5.00357	6.09839	6.25475	3.77714	489.651	0.0907538	0.53474	0.767884	0	-1.00509	-0.32257	-0.15502	1.88934	-1.65783	9.27068	9.51964	-5.32015	-4.1552	-4.11842	-6.23532	-5.58008	-4.91857	-5.68873	-3.92557	-6.60906	4.4929	4.64925
1.14936e-98	4.31248e-97	ENSOARG00000016930	3:133628051-133639981	protein_coding	KRT72	keratin 72 [Source:HGNC Symbol;Acc:28932]	6.11216	-0.196757	-1.45271	-5.33932	-3.15367	-6.07322	-6.07322	-5.31358	-6.07322	-4.67695	-6.07322	4.45339	488.694	12.2437	5.02673	4.02251	0	1.98352	-2.11469	-1.57604	-0.214224	-2.3673	1.83815	-1.97698	5.48176	-0.827163	-2.08312	-5.96972	-3.78407	-6.70363	-6.70363	-5.94399	-6.70363	-5.30735	-6.70363
2.4014e-98	8.99168e-97	ENSOARG00000016674	15:22072818-22084321	protein_coding	PLET1	placenta expressed transcript 1 [Source:HGNC Symbol;Acc:30053]	3.84351	-6.07322	-4.41975	-6.07322	-6.07322	-6.07322	-5.2769	-5.31358	-6.07322	-6.07322	-6.07322	0.952357	487.196	10.9599	-0.478328	2.88215	0	-0.478328	-0.367941	1.81878	1.78164	-0.233221	-0.0125084	0.099417	4.24134	-5.67539	-4.02192	-5.67539	-5.67539	-5.67539	-4.87907	-4.91576	-5.67539	-5.67539	-5.67539
2.54737e-98	9.5187e-97	ENSOARG00000019213	1:85887683-85900246	protein_coding	SYPL2	synaptophysin-like 2 [Source:HGNC Symbol;Acc:27638]	-3.2427	-3.42941	-3.67092	-3.20951	-3.97458	-2.1499	-4.6151	-3.58286	-2.78377	-6.07322	6.87566	3.66873	487.076	-1.09011	-1.15712	-1.37517	0	-1.76108	0.225947	-1.66771	-1.24648	-0.369955	-5.814	9.12048	-3.37758	-3.56429	-3.8058	-3.34439	-4.10946	-2.28477	-4.74998	-3.71774	-2.91865	-6.2081	6.74079
2.8061e-98	1.0464e-96	ENSOARG00000018081	3:176109798-176148459	protein_coding	BPIFC	BPI fold containing family C [Source:HGNC Symbol;Acc:16503]	4.12763	-3.42941	-5.36705	-4.65081	-3.15367	-5.24692	-4.31925	-5.33913	-5.00357	-6.07322	-4.73684	1.21868	486.879	8.70384	0.611423	-0.903778	0	0.908827	-0.70376	0.494503	-0.75936	-0.482266	-2.63304	0.378207	3.5141	-4.04294	-5.98059	-5.26434	-3.7672	-5.86045	-4.93278	-5.95266	-5.6171	-6.68675	-5.35037
2.88987e-98	1.07544e-96	ENSOARG00000015200	6:25185450-25212164	protein_coding	C4orf17	chromosome 4 open reading frame 17 [Source:HGNC Symbol;Acc:25274]	-4.86102	-2.00718	4.43366	-2.31093	-1.30427	-3.9822	-5.2769	-4.16398	-6.07322	-6.07322	-6.07322	1.64635	486.819	-1.911	-0.72871	6.90023	0	-0.0087798	-0.905712	-3.01281	-1.52246	-5.26616	-4.97551	-4.64373	-5.20698	-2.35315	4.0877	-2.65689	-1.65024	-4.32816	-5.62286	-4.50994	-6.41919	-6.41919	-6.41919
2.93484e-98	1.08996e-96	ENSOARG00000020090	1:14067780-14082679	protein_coding	NT5C1A	5'-nucleotidase, cytosolic IA [Source:HGNC Symbol;Acc:17819]	-3.22786	-3.42941	-2.87243	-3.72505	-6.07322	-4.62635	-5.12906	-2.4404	-2.73894	-3.14857	5.63761	2.28954	486.788	0.516415	-0.623972	0.121952	0	-4.14749	-0.78245	-2.46876	0.443449	0.548738	-0.502805	8.57906	-3.37451	-3.57607	-3.01909	-3.87171	-6.21988	-4.773	-5.27571	-2.58706	-2.8856	-3.29523	5.49095
5.22702e-98	1.93729e-96	ENSOARG00000019913	3:146417351-146452436	protein_coding			-0.859667	14.3826	-2.43089	-0.872388	-0.859345	-0.363346	-0.648618	-0.218352	1.99691	2.8369	1.48977	9.68514	485.614	0.412203	15.2482	-1.53855	0	-0.0133151	0.713745	0.0604299	0.639917	3.12889	3.31555	2.39061	-3.69175	11.5505	-5.26297	-3.70447	-3.69142	-3.19543	-3.4807	-3.05043	-0.835168	0.004819	-1.34231
1.07282e-97	3.96811e-96	ENSOARG00000000587	18:29598709-29612119	protein_coding	IDH3A	isocitrate dehydrogenase 3 (NAD+) alpha [Source:HGNC Symbol;Acc:5384]	4.83478	5.57452	5.14694	4.60064	4.51927	4.84012	4.69287	4.93756	3.90534	3.47106	8.50767	6.05075	484.152	0.244189	0.839569	0.570953	0	-0.215924	0.175845	0.100654	0.334971	-0.759777	-1.13295	3.93125	3.31072	4.05046	3.62288	3.07658	2.99521	3.31606	3.16881	3.41349	2.38128	1.94699	6.98361
1.07658e-97	3.97398e-96	ENSOARG00000003075	6:36866085-36866845	pseudogene			5.34567	5.81128	6.29078	5.83468	5.72038	5.48153	5.59399	5.70594	4.93709	6.26187	10.398	7.72488	484.145	-0.519376	-0.185703	0.428891	0	-0.276617	-0.55478	-0.282012	-0.155607	-1.0907	0.481581	4.55108	5.83168	6.29728	6.77678	6.32069	6.20638	5.96754	6.08	6.19194	5.4231	6.74787	10.884
1.94236e-97	7.15533e-96	ENSOARG00000006669	23:62100351-62105829	protein_coding	SERPINB3/4-like3		-1.26559	3.7385	8.23696	-2.41847	-1.70178	-4.29777	-3.98254	-6.07322	0.670841	-2.15693	-5.04577	5.60655	482.945	2.41059	3.33319	11.3616	0	-2.14156	-2.97202	-0.749396	-5.93337	3.3078	0.850953	-2.12216	-1.49948	3.50461	8.00308	-2.65235	-1.93567	-4.53166	-4.21643	-6.30711	0.436953	-2.39082	-5.27966
2.01088e-97	7.3928e-96	ENSOARG00000003013	5:7462843-7467992	protein_coding	PGLYRP2	peptidoglycan recognition protein 2 [Source:HGNC Symbol;Acc:30013]	-0.371793	3.06308	4.98741	-4.50525	-6.07322	-6.07322	-3.61605	-6.07322	-6.07322	5.30962	-6.07322	2.97471	482.874	4.27542	7.55372	9.51222	0	-2.58129	-2.63726	1.57098	-2.60019	-2.697	10.1525	-2.60729	-1.22699	2.20788	4.13221	-5.36044	-6.92841	-6.92841	-4.47124	-6.92841	-6.92841	4.45443	-6.92841
2.57946e-97	9.46408e-96	ENSOARG00000024221	20:24357915-24357998	miRNA			-6.07322	-6.07322	-5.3689	-6.07322	-6.07322	-6.07322	-6.07322	-5.33913	-6.07322	-6.07322	4.03558	0.631968	482.368	-0.0665267	0.620114	1.56099	0	0.620114	0.221631	0.0447812	1.75696	-0.126068	0.330382	11.1413	-2.49976	-2.49976	-1.79543	-2.49976	-2.49976	-2.49976	-2.49976	-1.76567	-2.49976	-2.49976	7.60905
4.67813e-97	1.71297e-95	ENSOARG00000001043	7:76459604-76460329	protein_coding	GSTO1-like	cow ortho GSTO1	4.06772	8.36111	9.08111	4.96158	5.87939	4.51586	4.77703	4.47371	4.38629	7.34912	3.33576	6.77257	481.157	-1.00541	3.0106	4.01997	0	0.528734	-0.798876	-0.28638	-0.592301	-0.927054	2.3711	-1.71077	4.52968	8.82307	9.54307	5.42353	6.34135	4.97782	5.23899	4.93567	4.84825	7.81108	3.79772
1.23438e-96	4.51079e-95	ENSOARG00000015193	X:59698913-59705026	protein_coding	AWAT1	acyl-CoA wax alcohol acyltransferase 1 [Source:HGNC Symbol;Acc:23252]	3.80659	-6.07322	-6.07322	-6.07322	-6.07322	-6.07322	-6.07322	-5.31358	-6.07322	-6.07322	-6.07322	0.8841	479.184	10.865	0.0211445	-0.028039	0	0.0211445	-0.0626446	0.0569878	1.73567	-0.150985	0.140892	-0.0430019	3.77378	-6.10603	-6.10603	-6.10603	-6.10603	-6.10603	-6.10603	-5.34639	-6.10603	-6.10603	-6.10603
1.56024e-96	5.69018e-95	ENSOARG00000009961	21:25800835-25808122	protein_coding	SAA4	serum amyloid A4, constitutive [Source:HGNC Symbol;Acc:10516]	-4.54741	-6.07322	-6.07322	-6.07322	-3.97458	-6.07322	-6.07322	-6.07322	-6.07322	5.32754	-6.07322	1.81931	478.708	3.81093	-1.11698	0.0663362	0	1.80258	-0.811038	0.157911	0.00278042	-0.363906	12.4072	0.393829	-4.81525	-6.34106	-6.34106	-6.34106	-4.24242	-6.34106	-6.34106	-6.34106	-6.34106	5.05971	-6.34106
2.09042e-96	7.60856e-95	ENSOARG00000012929	12:53297207-53307981	protein_coding	SERPINC1	Ovis aries serpin peptidase inhibitor, clade C (antithrombin), member 1 (SERPINC1), mRNA. [Source:RefSeq mRNA;Acc:NM_001009393]	1.39411	2.99416	1.18995	-0.555189	1.23591	0.727146	0.683892	-0.152706	0.563707	11.4901	-1.39943	7.80725	478.113	1.25405	2.06969	0.899453	0	0.308231	0.0689169	0.50332	0.0980223	-0.0732523	11.2994	-1.56437	0.91075	2.51079	0.706586	-1.03855	0.752542	0.243782	0.200528	-0.636071	0.0803431	11.0068	-1.8828
6.27124e-96	2.27801e-94	ENSOARG00000002957	8:74131002-74160462	protein_coding	IYD	iodotyrosine deiodinase [Source:HGNC Symbol;Acc:21071]	-5.03705	-3.42941	-6.07322	-6.07322	2.45309	-3.90166	-0.661425	-2.49354	-6.07322	5.6791	-4.73684	2.17842	475.878	2.5709	2.77955	0.0623012	0	8.78039	4.36313	6.64058	4.86295	-0.0967066	12.5558	3.07298	-5.68689	-4.07926	-6.72307	-6.72307	1.80325	-4.55151	-1.31127	-3.14339	-6.72307	5.02926	-5.38668
6.44877e-96	2.33784e-94	ENSOARG00000018782	11:27299950-27321627	protein_coding	ALOXE3	arachidonate lipoxygenase 3 [Source:HGNC Symbol;Acc:13743]	4.86787	-1.61384	1.76151	-5.33932	-3.15367	-1.68802	-5.51486	-6.07322	-4.94983	-4.67695	-6.07322	2.07742	475.821	10.1872	3.487	7.17275	0	1.88171	4.17261	-0.0661352	-1.78876	0.375966	1.10719	-1.75384	2.86247	-3.61924	-0.243895	-7.34472	-5.15907	-3.69342	-7.52026	-8.07862	-6.95523	-6.68235	-8.07862
8.15899e-96	2.95197e-94	ENSOARG00000007007	23:30549746-30754530	protein_coding	KCTD1	potassium channel tetramerization domain containing 1 [Source:HGNC Symbol;Acc:18249]	4.68301	4.50486	5.77491	0.805675	0.699467	1.03184	0.859009	1.09253	0.996832	0.724336	0.186441	3.58776	475.343	3.77638	3.43561	4.88028	0	-0.375929	0.127521	-0.0178734	0.283462	0.0665718	-0.207276	-0.706173	4.54945	4.3713	5.64134	0.672111	0.565904	0.898272	0.725445	0.958971	0.863268	0.590772	0.0528773
1.17889e-95	4.25685e-94	ENSOARG00000019502	3:220841891-220986168	protein_coding	CELSR1	cadherin, EGF LAG seven-pass G-type receptor 1 [Source:HGNC Symbol;Acc:1850]	6.34574	6.58136	6.07817	1.56738	-0.992966	2.46272	2.47587	2.46307	0.198721	-0.337393	1.30179	4.59793	474.594	4.73558	4.98596	4.43914	0	-2.60974	0.844793	0.875531	0.88281	-1.42525	-2.02113	-0.111617	3.32568	3.5613	3.05812	-1.45268	-4.01302	-0.55734	-0.544192	-0.556987	-2.82134	-3.35745	-1.71827
1.34004e-95	4.82919e-94	ENSOARG00000017969	24:38117103-38117285	protein_coding	FAM220A	family with sequence similarity 220, member A [Source:HGNC Symbol;Acc:22422]	1.15733	-0.196757	1.16301	0.941517	1.1749	0.829417	1.19247	0.93443	-0.222033	0.74699	5.48108	2.61109	474.334	0.25787	-1.36979	0.23575	0	0.00944244	-0.205713	0.236771	-0.00457355	-1.2229	-0.249053	4.53865	3.60741	2.25333	3.6131	3.3916	3.62499	3.2795	3.64256	3.38451	2.22805	3.19707	7.93116
2.13507e-95	7.67909e-94	Addition35	1:101846511-101848765		SPRR4		3.74162	-6.07322	-5.36705	-5.33932	-6.07322	-6.07322	-6.07322	-5.34937	-6.07322	-6.07322	-6.07322	1.00472	473.386	9.26797	-2.53818	-0.140965	0	-2.53818	-2.38871	-1.54624	-0.0621874	-2.20092	-1.72895	-1.58424	2.56913	-7.24571	-6.53954	-6.51181	-7.24571	-7.24571	-7.24571	-6.52186	-7.24571	-7.24571	-7.24571
2.28557e-95	8.20421e-94	ENSOARG00000009916	24:14453274-14518770	protein_coding	ABCC6	ATP-binding cassette, sub-family C (CFTR/MRP), member 6 [Source:HGNC Symbol;Acc:57]	-4.63108	-6.07322	-4.69425	-1.58343	4.18603	-0.135754	0.130099	-1.13421	-3.58117	7.15757	-6.07322	3.56694	473.248	-2.85832	-7.41649	-4.00122	0	3.84217	0.605101	1.06069	-0.0544542	-1.83688	7.65026	-6.16301	-6.81631	-8.25845	-6.87949	-3.76866	2.0008	-2.32099	-2.05513	-3.31944	-5.7664	4.97233	-8.25845
6.89091e-95	2.46868e-93	ENSOARG00000013116	9:89665649-89675609	protein_coding	CA3	carbonic anhydrase III, muscle specific [Source:HGNC Symbol;Acc:1374]	-5.31763	-1.05091	1.5856	2.70682	0.514873	3.17916	2.94568	1.1859	-1.94605	4.38823	9.49295	6.56774	471.002	-8.42121	-4.30593	-1.26852	0	-2.7253	-0.18299	-0.142109	-1.30996	-5.24995	1.50542	6.42702	-5.00648	-0.739757	1.89675	3.01797	0.826021	3.49031	3.25683	1.49705	-1.6349	4.69938	9.8041
8.04392e-95	2.87609e-93	ENSOARG00000020506	1:198413998-198470076	protein_coding	ST6GAL1	beta-galactoside alpha-2,6-sialyltransferase 1 [Source:RefSeq peptide;Acc:NP_001254809]	3.73378	2.27766	1.70554	3.1418	3.81327	3.63396	3.74442	3.48076	4.56523	8.17631	1.32328	5.02409	470.688	0.574064	-0.917721	-1.30094	0	0.619332	0.386665	0.582279	0.314342	1.3146	5.10539	-1.83425	3.10338	1.64726	1.07513	2.51139	3.18286	3.00355	3.11401	2.85036	3.93483	7.5459	0.692872
9.82459e-95	3.5059e-93	ENSOARG00000017847	13:19659509-19713910	protein_coding			-5.31763	-6.07322	-6.07322	-5.23916	6.40528	2.12739	2.79212	-2.62821	-5.00357	-6.07322	-6.07322	2.27481	470.281	0.0115146	-1.71407	-1.82644	0	11.7643	7.80349	8.17947	3.75779	0.720039	-2.10795	-1.83821	-5.70168	-6.45727	-6.45727	-5.62321	6.02123	1.74334	2.40807	-3.01226	-5.38762	-6.45727	-6.45727
1.13969e-94	4.05904e-93	ENSOARG00000007907	17:68993164-69029382	protein_coding	SEC14L6	SEC14-like 6 (S. cerevisiae) [Source:HGNC Symbol;Acc:40047]	3.83242	0.42258	-0.624515	-0.869046	-0.245099	-2.42341	-1.35979	-0.716391	-1.16396	6.6801	-4.73684	3.29912	469.979	4.68955	1.03357	0.20388	0	0.361152	-1.55058	-0.593899	0.285911	-0.465912	7.43422	-3.45267	2.49214	-0.917697	-1.96479	-2.20932	-1.58538	-3.76369	-2.70007	-2.05667	-2.50424	5.33982	-6.07711
1.82708e-94	6.49449e-93	ENSOARG00000000389	1:102253641-102291777	protein_coding	PGLYRP3	peptidoglycan recognition protein 3 [Source:HGNC Symbol;Acc:30014]	3.08186	3.68703	4.58169	-5.38472	-3.97458	-4.51444	-3.86988	-5.06111	-1.75479	-2.42907	-6.07322	2.25068	469.019	8.50989	8.99015	9.9461	0	1.15028	0.572021	1.73581	0.773961	3.74967	2.86131	-1.74567	2.02666	2.63183	3.5265	-6.43991	-5.02978	-5.56963	-4.92508	-6.11631	-2.80998	-3.48427	-7.12842
2.1449e-94	7.60939e-93	ENSOARG00000016096	3:131849883-131853136	protein_coding	PPP1R1A	protein phosphatase 1, regulatory (inhibitor) subunit 1A [Source:HGNC Symbol;Acc:9286]	-2.09496	-2.54971	-1.50223	-0.16318	-3.97458	-1.30214	-1.3523	-1.59	-6.07322	2.45791	6.11607	2.95994	468.692	-2.32134	-3.00369	-1.29733	0	-4.54352	-1.51605	-1.63183	-1.92377	-7.27764	1.96823	5.85316	-0.790958	-1.2457	-0.198225	1.14083	-2.67057	0.00186935	-0.0482948	-0.285998	-4.76922	3.76192	7.42008
2.30736e-94	8.16984e-93	ENSOARG00000001892	4:54534231-54573286	protein_coding	PPP1R3A	protein phosphatase 1, regulatory subunit 3A [Source:HGNC Symbol;Acc:9291]	-3.66451	-2.54971	-4.15184	-2.3883	-6.07322	-6.07322	-2.01533	-2.18154	-5.00357	-6.07322	11.8623	8.75023	468.544	-0.986107	-0.848414	-2.91446	0	-5.3078	-5.49906	0.0229938	-0.911929	-3.39727	-6.23111	12.9903	-5.4091	-4.2943	-5.89644	-4.13289	-7.81781	-7.81781	-3.75992	-3.92613	-6.74816	-7.81781	10.1177
3.47727e-94	1.22884e-92	ENSOARG00000018329	12:48417494-48443236	protein_coding	PLCH2	phospholipase C, eta 2 [Source:HGNC Symbol;Acc:29037]	4.71038	3.36552	3.10474	-5.38472	-3.15367	-6.07322	-4.5707	-3.89214	-3.88017	-6.07322	-4.55687	2.30639	467.709	10.0148	8.7527	8.48255	0	2.13591	-1.77162	0.746983	2.12145	1.16266	-1.6898	2.42637	2.63177	1.28691	1.02613	-7.46333	-5.23228	-8.15183	-6.64931	-5.97075	-5.95878	-8.15183	-6.63548
3.9628e-94	1.39771e-92	ENSOARG00000006846	3:161904638-161916030	protein_coding	INHBC	inhibin, beta C [Source:HGNC Symbol;Acc:6068]	-6.07322	-3.42941	-6.07322	-6.07322	-1.30427	-6.07322	-6.07322	-5.31358	-6.07322	5.32161	-6.07322	1.56897	467.443	-0.0645055	4.26163	-0.059231	0	6.48037	0.292776	0.029491	1.70482	-0.0872144	12.7939	-0.177846	-6.90104	-4.25723	-6.90104	-6.90104	-2.13209	-6.90104	-6.90104	-6.1414	-6.90104	4.49379	-6.90104
3.99329e-94	1.40575e-92	ENSOARG00000004807	5:15203349-15289527	protein_coding	EMR1	egf-like module containing, mucin-like, hormone receptor-like 1 [Source:HGNC Symbol;Acc:3336]	-4.5662	-2.00718	-3.44568	0.322088	-1.95094	1.1235	1.35252	0.628218	4.77661	6.0882	-3.07599	3.04251	467.428	-3.69218	-2.45181	-4.05856	0	-2.39387	0.794071	0.822224	0.149934	4.39766	5.57928	-2.48116	-6.7096	-4.15058	-5.58907	-1.82131	-4.09433	-1.0199	-0.790872	-1.51518	2.63322	3.94481	-5.21938
1.10347e-93	3.87703e-92	ENSOARG00000008724	25:30693143-30726909	protein_coding	DUPD1	dual specificity phosphatase and pro isomerase domain containing 1 [Source:HGNC Symbol;Acc:23481]	-2.58272	-3.42941	-0.456045	-4.65081	-3.97458	-4.87186	-4.71854	-2.84478	-6.07322	-2.7026	4.54145	1.12509	465.36	1.94747	0.778468	4.25887	0	0.174507	0.118109	-0.00356217	1.6013	-2.77772	1.91784	9.05047	-3.55283	-4.39953	-1.42616	-5.62093	-4.9447	-5.84198	-5.68865	-3.8149	-7.04334	-3.67272	3.57133
2.88489e-93	1.01165e-91	ENSOARG00000016951	11:41198168-41202367	protein_coding	KRT13	keratin 13 [Source:HGNC Symbol;Acc:6415]	4.28712	14.6106	10.7328	-0.728527	-1.95094	-2.51408	1.02485	-1.41526	-2.11144	2.84927	-0.650573	10.2274	463.404	4.52999	13.8531	11.3294	0	-2.75048	-2.59837	1.27773	-0.878657	0.188363	2.63454	-0.224361	3.82245	14.1459	10.2682	-1.1932	-2.41561	-2.97874	0.560186	-1.87992	-2.5761	2.3846	-1.11524
3.46008e-93	1.21103e-91	ENSOARG00000013941	13:12077522-12092946	protein_coding	GATA3	GATA binding protein 3 [Source:UniProtKB/TrEMBL;Acc:Q30DT2]	5.98105	-2.00718	-0.461318	0.714453	2.29006	1.15695	1.28483	0.61194	1.78989	0.155941	0.35434	3.21701	463.034	5.11657	-3.01547	-1.30132	0	1.32331	0.220608	0.524564	-0.258451	0.850766	-0.525118	-0.522804	5.38364	-2.60459	-1.05873	0.117041	1.69265	0.559541	0.687416	0.0145285	1.19248	-0.441471	-0.243072
3.54561e-93	1.23859e-91	ENSOARG00000010722	5:17434669-17445140	protein_coding	CREB3L3	cAMP responsive element binding protein 3-like 3 [Source:HGNC Symbol;Acc:18855]	-3.89814	-3.42941	-0.706167	0.834812	6.34079	-1.57927	-2.43462	-0.788198	-1.95777	6.43656	-6.07322	3.45786	462.984	-5.16038	-4.50217	-2.0412	0	5.3882	-3.63708	-3.75559	-1.74009	-4.14052	6.01643	-9.26934	-4.35337	-3.88464	-1.1614	0.379584	5.88556	-2.0345	-2.88985	-1.24343	-2.413	5.98133	-6.52845
3.60467e-93	1.25681e-91	ENSOARG00000018242	1:77192131-77212785	protein_coding			1.46832	3.30989	1.57332	4.3233	4.07772	5.21964	5.21495	4.83575	10.2466	4.29041	1.85707	6.80354	462.951	-2.72377	-1.29719	-2.81014	0	-0.528915	0.864828	0.8923	0.48509	5.88917	-0.122968	-2.39726	0.315808	2.15738	0.420812	3.17079	2.92521	4.06714	4.06244	3.68325	9.0941	3.1379	0.70456
4.53178e-93	1.57704e-91	ENSOARG00000021051	7:62233421-62264350	protein_coding	DUOX1	dual oxidase 1 [Source:HGNC Symbol;Acc:3062]	4.97993	5.95782	6.02881	0.319802	-3.15367	-1.35381	-3.74932	-5.06111	-3.46707	-4.23098	-2.65328	3.89274	462.485	4.11231	4.84585	5.11557	0	-4.3641	-2.32929	-4.47822	-5.47409	-4.49057	-4.29458	-2.26568	2.78805	3.76594	3.83693	-1.87208	-5.34555	-3.54569	-5.94119	-7.25299	-5.65895	-6.42286	-4.84516
1.02312e-92	3.55364e-91	ENSOARG00000017148	3:133912776-133918028	protein_coding	KRT2.10	Keratin intermediate filament type II [Source:UniProtKB/TrEMBL;Acc:Q6T489]	6.73502	-6.07322	-6.07322	-6.07322	-6.07322	-6.07322	-6.07322	-6.07322	-6.07322	-6.07322	-3.69901	5.07727	460.828	14.7204	-0.325071	-0.0735858	0	-0.325071	-0.436627	0.245501	-0.0922009	-0.54569	0.427305	4.49719	6.30849	-6.49976	-6.49976	-6.49976	-6.49976	-6.49976	-6.49976	-6.49976	-6.49976	-6.49976	-4.12554
1.09141e-92	3.78363e-91	ENSOARG00000017762	1:76392689-76472227	protein_coding	AGL	amylo-alpha-1, 6-glucosidase, 4-alpha-glucanotransferase [Source:HGNC Symbol;Acc:321]	5.34713	6.11701	6.11645	5.62088	5.36173	5.49992	5.36214	5.5372	5.36248	7.27982	11.2287	8.38713	460.696	-0.29777	0.332543	0.444481	0	-0.422848	-0.141386	-0.266231	-0.127711	-0.291984	1.72123	5.60264	3.11263	3.88251	3.88195	3.38638	3.12723	3.26542	3.12764	3.30269	3.12798	5.04532	8.99421
1.96591e-92	6.80233e-91	ENSOARG00000014902	20:24932493-24946529	protein_coding			0.394507	-3.42941	-1.60037	-2.2481	0.863099	-4.87186	-4.5707	-3.12582	-4.59047	6.77845	-3.19123	3.35519	459.499	1.40181	-3.29704	-0.61591	0	1.10987	-3.73181	-3.53531	-2.15092	-3.41145	7.62359	-0.561179	0.967974	-2.85594	-1.0269	-1.67463	1.43657	-4.2984	-3.99723	-2.55236	-4.017	7.35192	-2.61777
1.99508e-92	6.89022e-91	ENSOARG00000011739	8:36569062-36642789	protein_coding	SIM1	single-minded family bHLH transcription factor 1 [Source:HGNC Symbol;Acc:10882]	-6.07322	-6.07322	-5.40042	-6.07322	-6.07322	-6.07322	-5.51486	-3.85572	-6.07322	-6.07322	4.21085	1.44838	459.469	-0.100047	1.33489	1.60898	0	1.33489	0.460059	1.75963	3.7205	-0.146819	0.544193	11.5536	-7.2736	-7.2736	-6.6008	-7.2736	-7.2736	-7.2736	-6.71524	-5.0561	-7.2736	-7.2736	3.01047
2.06666e-92	7.12393e-91	ENSOARG00000015112	3:170486337-170544238	protein_coding	MYBPC1	myosin binding protein C, slow type [Source:HGNC Symbol;Acc:7549]	-0.10705	0.91541	-4.6961	-1.86871	3.34437	-2.28179	0.400496	0.425506	0.631969	2.458	12.0514	8.99813	459.397	0.485474	1.16064	-4.81545	0	3.59423	-2.30654	0.552067	0.506372	0.659732	2.5433	12.0987	-1.85809	-0.835625	-6.44713	-3.61974	1.59333	-4.03282	-1.35054	-1.32553	-1.11907	0.706969	10.3004
2.70344e-92	9.30136e-91	ENSOARG00000004494	5:57230723-57234300	protein_coding	SPINK7	serine peptidase inhibitor, Kazal type 7 (putative) [Source:HGNC Symbol;Acc:24643]	3.78863	4.28593	2.8427	-5.06132	-6.07322	-6.07322	-6.07322	-5.33913	-6.07322	-6.07322	-6.07322	2.00151	458.85	8.71482	8.20187	7.79066	0	-3.15672	-2.87646	-2.5289	-0.667358	-2.47736	-2.81553	-2.27235	5.76006	6.25736	4.81413	-3.08989	-4.10179	-4.10179	-4.10179	-3.3677	-4.10179	-4.10179	-4.10179
2.86844e-92	9.85047e-91	ENSOARG00000011462	16:39050049-39092566	protein_coding	AGXT2	alanine--glyoxylate aminotransferase 2 [Source:HGNC Symbol;Acc:14412]	-4.26517	-2.54971	-5.3689	-6.07322	-3.15367	-6.07322	-3.77437	-6.07322	-3.01479	6.14788	-6.07322	2.40634	458.73	4.5275	3.63502	1.75811	0	2.99655	-0.602485	3.20315	-0.0103643	3.89085	13.2783	0.234034	-5.2316	-3.51614	-6.33533	-7.03965	-4.1201	-7.03965	-4.7408	-7.03965	-3.98122	5.18145	-7.03965
4.13541e-92	1.41747e-90	ENSOARG00000009377	6:84470674-84505943	protein_coding			-5.31763	-0.647009	1.00493	-2.41503	-0.422289	0.718543	1.34423	-0.713907	-6.07322	7.9429	-6.07322	4.42285	457.985	-4.05953	-0.0460707	2.35882	0	0.181096	1.83145	2.68182	1.61273	-6.04857	9.12555	-5.67121	-5.96195	-1.29133	0.360611	-3.05934	-1.06661	0.0742254	0.699908	-1.35822	-6.71754	7.29859	-6.71754
4.65524e-92	1.59265e-90	ENSOARG00000007298	11:43409959-43416537	protein_coding	ASB16	ankyrin repeat and SOCS box containing 16 [Source:HGNC Symbol;Acc:19768]	-3.26857	-2.54971	-3.27177	-3.34863	-0.164048	-3.31308	-5.26342	-4.30147	-6.07322	-6.07322	4.05782	0.512646	457.744	-0.033889	0.687451	0.016996	0	3.12519	-0.256566	-1.35655	-0.732018	-3.77021	-3.79461	7.36461	-3.60884	-2.88999	-3.61205	-3.68891	-0.504326	-3.65335	-5.60369	-4.64175	-6.4135	-6.4135	3.71754
1.0449e-91	3.56811e-90	ENSOARG00000002493	JH922656.1:15039-19249	protein_coding			3.3145	4.02772	4.14085	4.04237	5.86739	4.25407	4.17792	3.33398	0.918607	10.1744	-0.165464	6.68816	456.098	-0.833488	0.591192	-0.0290802	0	2.43134	0.342645	-0.00487886	-0.721379	-2.98549	6.20854	-4.35469	3.96287	4.67609	4.78922	4.69075	6.51576	4.90245	4.8263	3.98235	1.56698	10.8227	0.482908
1.68829e-91	5.7544e-90	ENSOARG00000006779	3:161898847-161900143	protein_coding	INHBE	inhibin, beta E [Source:HGNC Symbol;Acc:24029]	-6.07322	-6.07322	-5.40042	-5.33932	-3.97458	-5.24692	-6.07322	-5.34937	-6.07322	5.45655	-6.07322	1.74889	455.122	-1.7365	-1.83462	-0.127511	0	1.08494	0.46983	-1.96177	0.0382824	-1.34633	10.4812	-1.72623	-6.13948	-6.13948	-5.46668	-5.40558	-4.04084	-5.31318	-6.13948	-5.41564	-6.13948	5.39029	-6.13948
1.72867e-91	5.88103e-90	ENSOARG00000019937	3:146463815-146532517	protein_coding	MUC19	mucin 19, oligomeric [Source:HGNC Symbol;Acc:14362]	0.180543	14.9281	-0.216897	1.10054	0.742148	1.21197	0.722964	1.11085	3.16057	3.5414	2.4189	10.232	455.073	-0.818828	14.2219	-1.2153	0	0.0296036	0.502809	-0.313413	0.11136	2.50275	2.34364	1.44607	-2.17842	12.5691	-2.57586	-1.25842	-1.61681	-1.14698	-1.636	-1.24811	0.801614	1.18245	0.0599389
1.8602e-91	6.31671e-90	ENSOARG00000011055	2:248168842-248189290	protein_coding	PADI1	peptidyl arginine deiminase, type I [Source:HGNC Symbol;Acc:18367]	2.80889	6.60928	6.3824	-4.37865	-3.97458	-6.07322	-4.99181	-4.29845	-6.07322	-4.08955	-6.07322	4.3229	454.924	7.46976	10.2528	10.4599	0	-0.51007	-3.67549	-0.582101	-0.345996	-3.90353	0.966628	-3.48606	1.86778	5.66817	5.44129	-5.31976	-4.91569	-7.01433	-5.93292	-5.23956	-7.01433	-5.03065	-7.01433
2.19716e-91	7.44707e-90	ENSOARG00000000956	JH922771.1:2680-35444	protein_coding			2.82206	3.73005	3.52685	3.8544	5.30057	3.62555	3.16029	2.35964	0.378491	10.1806	0.255396	6.65191	454.585	-1.26785	0.138208	-0.58256	0	1.70927	-0.275845	-0.941388	-1.60708	-3.4527	6.30677	-3.88795	3.25646	4.16445	3.96125	4.2888	5.73498	4.05995	3.5947	2.79404	0.812894	10.615	0.689799
2.41042e-91	8.15474e-90	ENSOARG00000017040	6:90870170-90871181	protein_coding	FAM47E-STBD1	FAM47E-STBD1 readthrough [Source:HGNC Symbol;Acc:44667]	4.08803	2.02476	3.16549	2.84592	3.28065	2.61891	2.34158	4.01629	0.744765	6.76528	8.97884	6.22637	454.397	1.08672	-0.602032	0.233029	0	0.655393	-0.185899	-0.656386	1.27802	-2.14494	3.84499	6.07289	4.36557	2.30229	3.44302	3.12345	3.55818	2.89644	2.61911	4.29382	1.0223	7.04281	9.25638
5.51307e-91	1.86168e-89	ENSOARG00000011317	2:49955240-50073317	protein_coding	CCDC180	coiled-coil domain containing 180 [Source:HGNC Symbol;Acc:29303]	2.35092	-0.834869	-3.71994	-2.00741	-1.95094	-0.270424	0.0929719	-0.705569	-4.59047	7.3488	-3.70938	3.74591	452.713	4.83693	0.904788	-1.85798	0	-0.234073	2.43325	2.66465	1.55451	-1.80422	8.9171	-1.39302	-0.855258	-4.04104	-6.92612	-5.21358	-5.15711	-3.4766	-3.1132	-3.91174	-7.79664	4.14262	-6.91556
1.20566e-90	4.06382e-89	ENSOARG00000012554	22:32978232-33012630	protein_coding	HABP2	hyaluronan binding protein 2 [Source:HGNC Symbol;Acc:4798]	-5.31763	-3.42941	-5.3689	0.998921	2.20107	-6.07322	-6.07322	-4.61528	-6.07322	7.19257	-6.07322	3.59737	451.119	-7.89387	-6.82486	-7.94725	0	-1.07641	-10.2341	-9.38404	-7.0155	-10.0985	5.32976	-9.48517	-6.26772	-4.37951	-6.31899	0.0488262	1.25098	-7.02332	-7.02332	-5.56538	-7.02332	6.24247	-7.02332
1.25112e-90	4.20927e-89	ENSOARG00000020482	1:96775290-96979085	protein_coding	PDE4DIP	phosphodiesterase 4D interacting protein [Source:HGNC Symbol;Acc:15580]	4.323	4.75029	5.50164	6.09676	5.2311	5.93744	5.72765	5.86493	5.17599	5.09116	11.8587	8.90336	451.044	-1.90056	-1.15502	-0.492301	0	-0.674099	0.0108098	-0.487597	-0.346618	-0.743908	-1.23827	5.76574	1.42944	1.85673	2.60808	3.2032	2.33755	3.04388	2.8341	2.97137	2.28244	2.1976	8.96518
1.45781e-90	4.8946e-89	ENSOARG00000008194	6:83691691-83787544	protein_coding	TMPRSS11F	transmembrane protease, serine 11F [Source:HGNC Symbol;Acc:29994]	4.3471	0.790911	-3.90398	-6.07322	-6.07322	-6.07322	-6.07322	-6.07322	-6.07322	-6.07322	-6.07322	1.43425	450.733	11.4886	7.84634	3.81439	0	-0.0115848	-0.162569	0.127373	-0.0582935	-0.31342	0.299853	-0.078937	3.51279	-0.0433952	-4.73829	-6.90753	-6.90753	-6.90753	-6.90753	-6.90753	-6.90753	-6.90753	-6.90753
1.46019e-90	4.8946e-89	ENSOARG00000002586	15:26993181-26994743	protein_coding	APOA1	apolipoprotein A-I [Source:HGNC Symbol;Acc:600]	1.70391	0.854503	-2.48003	1.33422	8.33689	0.296103	0.519085	1.06	4.79055	9.08222	1.41524	5.86597	450.729	0.347404	-0.383824	-2.69593	0	7.10447	-0.919158	-0.803888	0.0404101	3.53412	7.71536	0.330531	2.06236	1.21296	-2.12158	1.69267	8.69535	0.654557	0.877538	1.41845	5.149	9.44067	1.7737
1.57531e-90	5.27079e-89	ENSOARG00000011188	13:63837807-63862044	protein_coding	MYH7B	myosin, heavy chain 7B, cardiac muscle, beta [Source:HGNC Symbol;Acc:15906]	3.86753	1.57418	1.56808	0.542038	-0.859345	-0.390764	-0.687809	-0.246644	-1.57267	-2.07611	6.92411	4.04722	450.575	2.92314	0.576689	0.590137	0	-1.87281	-1.39395	-1.64873	-1.07918	-2.30832	-2.81385	6.03036	1.31564	-0.977702	-0.983801	-2.00985	-3.41123	-2.94265	-3.23969	-2.79853	-4.12456	-4.628	4.37222
1.84992e-90	6.17826e-89	ENSOARG00000016800	3:133420696-133428181	protein_coding	KRT78	keratin 78 [Source:HGNC Symbol;Acc:28926]	1.54796	11.4449	11.1019	-1.36662	-2.2523	-6.07322	-2.40831	-3.85572	-3.86234	-1.14425	-5.04577	8.66243	450.248	2.52402	10.8618	12.2783	0	-2.88737	-7.36731	-0.380056	-2.68853	-2.81894	-0.714727	-3.53293	0.881653	10.7786	10.4356	-2.03292	-2.91861	-6.73952	-3.07462	-4.52202	-4.52864	-1.81055	-5.71207
1.90136e-90	6.33846e-89	ENSOARG00000010874	11:44846960-44855421	protein_coding	WNT3	wingless-type MMTV integration site family, member 3 [Source:HGNC Symbol;Acc:12782]	3.78985	-0.196757	-4.08724	-6.07322	-3.97458	-6.07322	-6.07322	-6.07322	-6.07322	-6.07322	-6.07322	0.954673	450.192	10.9984	6.23543	3.51045	0	2.29085	-0.425388	0.0620773	0.00591398	-0.157507	-0.154652	0.185629	3.68015	-0.306452	-4.19694	-6.18292	-4.08428	-6.18292	-6.18292	-6.18292	-6.18292	-6.18292	-6.18292
2.34087e-90	7.78936e-89	ENSOARG00000001218	25:41835784-41839844	protein_coding	GDF2	growth differentiation factor 2 [Source:HGNC Symbol;Acc:4217]	-5.31763	-2.54971	-4.38847	-6.07322	-6.07322	-6.07322	-5.12906	-4.57949	-6.07322	5.0451	-6.07322	1.20342	449.769	1.76254	4.77821	2.79467	0	0.318827	0.00483875	1.85215	2.49221	-0.283389	12.5269	-0.150004	-5.67152	-2.9036	-4.74235	-6.42711	-6.42711	-6.42711	-5.48295	-4.93338	-6.42711	4.69121	-6.42711
2.52188e-90	8.37641e-89	ENSOARG00000020376	1:95560945-95683845	protein_coding	TBX15	T-box 15 [Source:HGNC Symbol;Acc:11594]	3.56913	0.581361	-1.86244	-3.31065	-6.07322	-4.87186	-5.26342	-5.03254	-4.94983	-6.07322	6.18088	3.20469	449.617	5.68603	3.37274	0.630025	0	-4.27466	-1.66984	-2.89261	-2.55596	-2.63946	-5.17407	8.39101	2.71394	-0.273831	-2.71764	-4.16584	-6.92841	-5.72705	-6.11861	-5.88773	-5.80502	-6.92841	5.32569
3.32447e-90	1.10221e-88	ENSOARG00000014148	1:123135539-123144867	protein_coding			5.2883	-6.07322	-5.40042	-2.85587	-3.15367	-2.73899	-2.7455	-2.89629	-3.88017	-1.97036	-4.00308	2.58745	449.054	8.2538	-4.44975	-2.75697	0	-0.628835	-0.19632	0.00657177	0.26795	-1.58855	0.830037	-0.752715	3.52531	-7.83621	-7.16341	-4.61886	-4.91666	-4.50197	-4.50848	-4.65928	-5.64316	-3.73335	-5.76607
6.58549e-90	2.17943e-88	ENSOARG00000025191	1:102072774-102072965	protein_coding	SPRR2-like2	close to small proline-rich protein type II	-3.38475	5.84689	8.60755	-3.69655	-6.07322	-6.07322	-4.02426	-6.07322	-6.07322	-4.54485	-5.04577	5.60401	447.663	2.23372	7.34466	12.5652	0	-5.57526	-5.21309	-0.367783	-4.24389	-4.68707	-1.79496	-0.789511	-1.00393	8.22771	10.9884	-1.31573	-3.6924	-3.6924	-1.64344	-3.6924	-3.6924	-2.16402	-2.66495
1.53626e-89	5.07494e-88	ENSOARG00000020383	1:190217503-190249177	protein_coding	BDH1	3-hydroxybutyrate dehydrogenase, type 1 [Source:HGNC Symbol;Acc:1027]	4.88152	5.80324	8.88878	2.17182	0.121087	0.75454	2.29821	2.42607	2.56623	-3.36853	0.340103	6.01856	445.938	2.6916	3.61562	6.68123	0	-2.07623	-1.47152	0.175373	0.687637	0.435044	-3.82123	-1.74939	3.61969	4.54141	7.62695	0.909987	-1.14074	-0.507291	1.03638	1.16424	1.3044	-4.63036	-0.921729
2.08231e-89	6.86634e-88	ENSOARG00000000743	AMGL01120069.1:21-3561	protein_coding			-1.20052	-0.196757	-0.836128	1.00888	2.02214	1.81988	-0.348371	0.874606	-0.01264	7.97254	-2.62843	4.35523	445.318	-2.2584	-0.985186	-1.85289	0	1.24341	0.668129	-1.34442	0.249575	-1.17917	7.10918	-2.34117	-0.120428	0.883331	0.24396	2.08896	3.10223	2.89997	0.731717	1.95469	1.06745	9.05263	-1.54834
5.19193e-89	1.70893e-87	ENSOARG00000010191	2:42401343-42668040	protein_coding	PEBP4	phosphatidylethanolamine-binding protein 4 [Source:HGNC Symbol;Acc:28319]	-3.70335	2.86115	-5.36705	-2.96394	-0.330975	-3.68814	-3.53369	-4.57949	-6.07322	-6.07322	5.76776	2.52798	443.458	-1.4156	4.16326	-3.74164	0	0.959072	-2.57484	-0.632296	-2.76878	-5.60531	-5.32683	7.52831	-3.40999	3.15451	-5.0737	-2.67058	-0.0376165	-3.39478	-3.24033	-4.28614	-5.77986	-5.77986	6.06112
6.78212e-89	2.22832e-87	ENSOARG00000016666	11:41156442-41163908	protein_coding	KRT32	keratin 32 [Source:HGNC Symbol;Acc:6449]	4.18274	-2.00718	6.74551	-4.37865	-6.07322	-6.07322	-5.2769	-5.31358	-6.07322	-6.07322	-6.07322	4.29887	442.914	9.17689	1.42931	10.7266	0	-3.59301	-3.65247	-1.34339	-1.57894	-3.71356	-2.94412	-3.2784	3.94151	-2.24841	6.50428	-4.61988	-6.31445	-6.31445	-5.51813	-5.55481	-6.31445	-6.31445	-6.31445
9.16998e-89	3.00746e-87	ENSOARG00000020528	1:198806196-198813239	protein_coding	AHSG	Ovis aries alpha-2-HS-glycoprotein (AHSG), mRNA. [Source:RefSeq mRNA;Acc:NM_001009802]	-0.673515	7.88946	7.53175	0.447499	-6.07322	-0.457482	-0.609371	-1.41509	4.21097	12.6918	-6.07322	9.10868	442.299	-2.14444	5.90515	6.06818	0	-9.05749	-2.21885	-1.94229	-1.90695	2.45564	11.4609	-8.50556	-1.21056	7.35242	6.99471	-0.0895482	-6.61027	-0.99453	-1.14642	-1.95213	3.67392	12.1548	-6.61027
1.10513e-88	3.61796e-87	ENSOARG00000012952	5:4719992-4737321	protein_coding	PDE4C	phosphodiesterase 4C, cAMP-specific [Source:HGNC Symbol;Acc:8782]	1.27704	-2.54971	-0.294043	0.571297	1.1749	0.875584	0.635807	0.55476	0.71185	-1.84016	6.86373	3.80077	441.919	1.17753	-3.1943	-0.785306	0	0.58969	0.397202	0.122031	-0.0337092	0.241708	-2.16846	6.31923	-0.198042	-4.02479	-1.76913	-0.903788	-0.300183	-0.599501	-0.839278	-0.920325	-0.763235	-3.31524	5.38865
1.11097e-88	3.63056e-87	ENSOARG00000001947	25:43127841-43132260	protein_coding	C10orf71	chromosome 10 open reading frame 71 [Source:HGNC Symbol;Acc:26973]	-2.34054	-6.07322	-2.7031	-1.15406	-3.15367	-2.51408	-4.79863	-1.39955	-6.07322	-6.07322	7.74742	4.71903	441.908	-1.16597	-5.35901	-1.13494	0	-1.5381	-1.01829	-3.33447	-0.612178	-6.00312	-6.8392	8.90335	-4.41299	-8.14567	-4.77555	-3.22651	-5.22612	-4.58653	-6.87108	-3.472	-8.14567	-8.14567	5.67497
1.91025e-88	6.23139e-87	ENSOARG00000014033	14:55679549-55681749	protein_coding	ASPDH	aspartate dehydrogenase domain containing [Source:HGNC Symbol;Acc:33856]	-5.3236	-6.07322	-6.07322	-5.38472	-0.330975	-5.24692	-6.07322	-6.07322	-6.07322	5.03007	-6.07322	1.25531	440.804	-0.0410838	-2.01185	-1.82962	0	4.71686	0.0743244	-1.73495	-1.83805	-2.00692	10.3916	-1.80097	-5.18119	-5.93081	-5.93081	-5.2423	-0.188558	-5.10451	-5.93081	-5.93081	-5.93081	5.17249	-5.93081
2.08264e-88	6.78158e-87	ENSOARG00000009207	12:67363929-67396799	protein_coding			2.64457	3.32119	4.41921	3.43805	2.94838	2.81765	2.85906	2.77784	2.86747	3.12803	7.46548	4.83117	440.629	-0.834637	-0.107521	0.955041	0	-0.480647	-0.656335	-0.622396	-0.727089	-0.608984	-0.361077	3.9737	2.39239	3.06901	4.16703	3.18588	2.6962	2.56548	2.60688	2.52566	2.6153	2.87586	7.21331
2.09168e-88	6.79891e-87	ENSOARG00000008761	6:84116959-84136907	protein_coding			-6.07322	-2.54971	1.5857	-2.41173	2.5879	0.01262	0.694823	-2.26255	-6.07322	8.70709	-6.07322	5.10526	440.62	-5.98397	-1.57664	2.70778	0	3.62332	0.953196	1.80621	0.483971	-6.16289	10.0067	-5.97417	-6.74497	-3.22145	0.913958	-3.08347	1.91615	-0.659126	0.0230768	-2.93429	-6.74497	8.03535	-6.74497
2.66906e-88	8.6602e-87	ENSOARG00000009254	15:77828987-77834803	protein_coding			-6.07322	-3.42941	-6.07322	-5.33932	-1.48938	-6.07322	-5.2769	-6.07322	4.59846	-4.54485	-6.07322	1.82207	440.123	-1.69416	0.57521	-1.67813	0	2.60514	-2.62604	0.113258	-1.74889	10.2283	0.816404	-1.30888	-5.4803	-2.83649	-5.4803	-4.7464	-0.896459	-5.4803	-4.68398	-5.4803	5.19138	-3.95193	-5.4803
3.81848e-88	1.23677e-86	ENSOARG00000012060	3:165288137-165302070	protein_coding	AMDHD1	amidohydrolase domain containing 1 [Source:HGNC Symbol;Acc:28577]	1.16372	-2.54971	-1.28173	-1.99721	-0.859345	-0.897543	-1.74764	-1.0996	0.259274	6.78086	-1.55444	3.22639	439.394	2.50244	-1.73813	-0.0722998	0	-0.00320095	0.230952	-0.338581	0.225418	1.48616	7.88991	-0.180187	0.806451	-2.90698	-1.63901	-2.35448	-1.21662	-1.25481	-2.10491	-1.45687	-0.0979967	6.42359	-1.91171
8.99075e-88	2.90685e-86	ENSOARG00000019515	3:35327956-35449712	protein_coding	PLB1	phospholipase B1 [Source:HGNC Symbol;Acc:30041]	4.64985	-1.61384	-0.209413	-1.32675	4.00071	-1.63144	-1.21915	-2.82349	-2.05284	1.58288	-6.07322	2.27722	437.649	5.93801	-1.12504	1.03802	0	4.52201	-0.74135	0.372346	-1.54221	-1.05344	2.88169	-5.76103	2.47257	-3.79112	-2.38669	-3.50403	1.82343	-3.80872	-3.39643	-5.00077	-4.23012	-0.594401	-8.2505
1.02339e-87	3.30293e-86	ENSOARG00000012425	1:118216685-118399629	protein_coding	DCAF6	DDB1 and CUL4 associated factor 6 [Source:HGNC Symbol;Acc:30002]	5.66966	5.45908	5.45856	5.37215	5.42695	5.45645	5.3258	5.48762	5.02335	5.53026	9.25561	6.76506	437.386	0.286677	-0.00389882	0.0770039	0	-0.0360341	0.0604095	-0.0460815	0.122164	-0.37449	0.142932	3.87782	4.06227	3.85169	3.85117	3.76476	3.81956	3.84906	3.71841	3.88023	3.41596	3.92287	7.64822
1.23066e-87	3.96487e-86	ENSOARG00000002793	5:7390664-7414174	protein_coding	CYP4F22	cytochrome P450, family 4, subfamily F, polypeptide 22 [Source:HGNC Symbol;Acc:26820]	4.96692	3.93515	3.91637	-2.26512	-0.737057	-1.20873	-2.44691	-2.41648	-0.690261	-2.07611	-6.07322	2.72863	437.01	6.6447	4.88779	5.58087	0	0.19831	0.0926213	-0.810572	-0.302886	0.66593	-0.0370147	-5.35315	4.39937	3.36761	3.34882	-2.83267	-1.3046	-1.77627	-3.01446	-2.98403	-1.25781	-2.64366	-6.64077
1.34242e-87	4.31729e-86	ENSOARG00000013744	1:266415690-266427305	protein_coding			-1.59085	2.20634	4.43926	1.19622	3.2661	-0.0086186	-0.296146	0.136215	0.334066	6.52568	0.522797	3.60931	436.833	-2.31181	0.562991	3.36399	0	1.62396	-1.68502	-1.45751	-0.98131	-1.34354	5.59866	-0.698342	-1.9771	1.82008	4.053	0.809957	2.87984	-0.394878	-0.682405	-0.250044	-0.0521927	6.13942	0.136538
2.54219e-87	8.16141e-86	ENSOARG00000020455	2:227138147-227139070	protein_coding			3.3278	3.76356	4.74645	4.39797	3.9741	3.9514	4.36619	4.38413	3.76361	4.4413	7.76659	5.36225	435.532	-1.06898	-0.76211	0.332142	0	-0.551468	-0.462194	-0.0399755	-0.0340195	-0.649652	-0.0354626	3.35399	3.52375	3.95951	4.9424	4.59392	4.17005	4.14734	4.56214	4.58007	3.95956	4.63725	7.96254
2.64857e-87	8.48798e-86	ENSOARG00000008736	20:22281213-22282466	protein_coding	PGK2	phosphoglycerate kinase 2 [Source:HGNC Symbol;Acc:8898]	2.71353	3.11593	3.78643	2.70559	3.29505	2.50171	2.36797	2.66469	2.25541	3.33478	6.94898	4.44907	435.448	-0.0260372	0.114485	1.07416	0	0.293752	-0.395507	-0.349953	-0.0666583	-0.641799	0.639959	4.29384	2.38699	2.78939	3.45989	2.37905	2.96852	2.17517	2.04143	2.33815	1.92888	3.00824	6.62244
3.12428e-87	9.99494e-86	ENSOARG00000018785	1:81887323-81888323	protein_coding			6.4509	7.28135	7.81041	6.77853	6.85814	6.86101	6.5463	6.61177	6.10301	7.40209	12.0485	9.27524	435.112	-0.299378	0.270594	1.02576	0	-0.15264	-0.0845011	-0.217135	-0.174057	-0.849434	0.70191	5.27317	6.47417	7.30462	7.83368	6.8018	6.88141	6.88428	6.56957	6.63504	6.12628	7.42536	12.0718
5.58764e-87	1.78442e-85	Addition25	1:101649951-101650274		LCE1-like2		3.44691	-6.07322	-6.07322	-6.07322	-6.07322	-6.07322	-6.07322	-6.07322	-6.07322	-6.07322	-6.07322	0.629262	433.927	10.6441	-0.0578979	0.0487539	0	-0.0578979	0.0895785	-0.0857258	0.0471437	0.2742	-0.207873	0.0749102	5.0773	-4.44283	-4.44283	-4.44283	-4.44283	-4.44283	-4.44283	-4.44283	-4.44283	-4.44283	-4.44283
9.97908e-87	3.18127e-85	ENSOARG00000017986	24:1743305-1745028	protein_coding	DNASE1L2	deoxyribonuclease I-like 2 [Source:HGNC Symbol;Acc:2958]	5.15158	-1.05091	-3.41161	-1.94528	0.41289	-0.520212	-0.3824	-1.42271	-0.200201	-6.07322	-3.70938	2.4024	432.746	7.11137	0.276332	-0.955663	0	1.75443	0.950601	1.8843	0.55218	1.29505	-5.1096	-1.37685	5.33437	-0.86812	-3.22882	-1.76249	0.595676	-0.337426	-0.199614	-1.23993	-0.0174147	-5.89044	-3.5266
1.36224e-86	4.33516e-85	ENSOARG00000017272	11:41324173-41338864	protein_coding	KRT14	Keratin 14 [Source:UniProtKB/TrEMBL;Acc:C8C9Q3]	9.28802	7.05814	12.5991	2.98873	2.37388	1.91519	4.41892	2.61311	-4.59047	-2.42907	-4.00308	9.67139	432.112	6.15957	3.54422	9.47897	0	-1.14203	-1.32597	1.28194	0.977619	-7.40633	-5.50105	-6.47273	8.8423	6.61241	12.1533	2.543	1.92815	1.46946	3.97319	2.16738	-5.03619	-2.8748	-4.44881
1.47073e-86	4.67225e-85	ENSOARG00000003383	4:12630296-12713661	protein_coding	ASB4	ankyrin repeat and SOCS box containing 4 [Source:HGNC Symbol;Acc:16009]	-0.049481	-1.30509	-6.07322	-6.07322	-3.97458	-6.07322	-6.07322	-5.06111	-6.07322	3.04708	5.31108	2.24473	431.956	7.42622	6.1051	0.0315637	0	3.28323	0.368944	-0.112942	2.51048	0.374727	10.2096	12.696	-0.406751	-1.66236	-6.43049	-6.43049	-4.33185	-6.43049	-6.43049	-5.41838	-6.43049	2.68981	4.95381
2.19604e-86	6.9643e-85	ENSOARG00000009779	5:40807088-40809220	protein_coding	CFD	complement factor D (adipsin) [Source:HGNC Symbol;Acc:2771]	0.725045	3.1029	1.29271	4.23482	6.20244	5.57169	5.85881	5.22012	9.42461	7.08991	3.28325	6.42366	431.139	-3.12706	-1.15413	-2.97871	0	1.94652	1.28305	1.60912	0.977558	5.13761	2.83235	-0.957655	1.0835	3.46135	1.65116	4.59327	6.5609	5.93014	6.21726	5.57857	9.78307	7.44836	3.6417
3.53602e-86	1.11943e-84	ENSOARG00000020285	3:149806867-149858378	protein_coding	BEST3	bestrophin 3 [Source:HGNC Symbol;Acc:17105]	-6.07322	-6.07322	-6.07322	-3.92562	-6.07322	-3.68814	-6.07322	-5.34937	-6.07322	-4.67695	3.78152	0.12487	430.168	-3.65921	-3.93051	-3.66076	0	-3.93051	-0.696838	-3.69701	-1.91338	-3.65663	-0.892823	7.2171	-7.08901	-7.08901	-7.08901	-4.94141	-7.08901	-4.70392	-7.08901	-6.36516	-7.08901	-5.69273	2.76574
9.31491e-86	2.9438e-84	ENSOARG00000006951	5:59083117-59146308	protein_coding	CAMK2	Ca2+/calmodulin-dependent protein kinase II [Source:UniProtKB/TrEMBL;Acc:Q9GLG6]	-2.60361	-2.54971	-4.02791	-1.55317	-3.97458	-1.57927	-0.874751	0.85506	-6.07322	-4.54485	6.86424	3.71879	428.194	-1.15245	-1.17886	-2.19187	0	-2.71869	-0.446381	0.29666	2.75983	-5.89668	-2.86856	8.09854	-3.88159	-3.82769	-5.30589	-2.83115	-5.25257	-2.85725	-2.15274	-0.422925	-7.35121	-5.82283	5.58625
1.22331e-85	3.85935e-84	ENSOARG00000001788	JH922313.1:3522-16150	protein_coding			1.20042	-6.07322	-6.07322	-6.07322	-6.07322	-6.07322	-6.07322	-6.07322	-6.07322	-6.07322	-6.07322	-1.08345	427.639	8.63337	-0.704672	0.0745749	0	-0.704672	-0.423561	0.00647293	0.0406345	-0.00585287	-0.300915	0.278822	1.19323	-6.08042	-6.08042	-6.08042	-6.08042	-6.08042	-6.08042	-6.08042	-6.08042	-6.08042	-6.08042
1.48893e-85	4.68924e-84	ENSOARG00000012428	10:32287803-32296204	protein_coding	URAD	ureidoimidazoline (2-oxo-4-hydroxy-4-carboxy-5-) decarboxylase [Source:HGNC Symbol;Acc:17785]	-6.07322	-2.54971	-5.3689	-4.95026	-1.14024	0.866561	-1.24552	-3.58312	-2.63257	5.26237	-6.07322	1.61824	427.238	-2.66394	1.17438	-0.960177	0	2.62417	5.20706	3.38826	1.44849	1.94446	9.52734	-2.51791	-5.13534	-1.61183	-4.43102	-4.01238	-0.202361	1.80444	-0.307637	-2.64525	-1.69469	6.20025	-5.13534
3.25174e-85	1.02234e-83	ENSOARG00000015908	22:12267085-12276113	protein_coding	CARP	Ovis aries ankyrin repeat domain 1 (cardiac muscle) (ANKRD1), mRNA. [Source:RefSeq mRNA;Acc:NM_001252178]	0.0634793	-1.30509	-1.4825	0.314578	-6.07322	-4.87186	-4.03708	-0.85879	-4.53012	0.864684	9.85412	6.96401	425.646	-0.839624	-2.1664	-2.82279	0	-7.90781	-5.30992	-2.90449	-2.24109	-5.43396	-0.289539	8.6403	-0.421948	-1.79052	-1.96792	-0.170848	-6.55865	-5.35729	-4.52251	-1.34422	-5.01555	0.379257	9.36869
3.33544e-85	1.04685e-83	ENSOARG00000019949	3:224090383-224102291	protein_coding	CPT1B	Ovis aries carnitine palmitoyltransferase 1B (muscle) (CPT1B), nuclear gene encoding mitochondrial protein, mRNA. [Source:RefSeq mRNA;Acc:NM_001009259]	-0.459369	0.973849	1.53822	1.87521	0.563283	1.02417	1.5087	1.07607	0.13491	1.90446	6.05455	3.17724	425.595	-2.29411	-0.983382	-0.256286	0	-1.39575	-0.868807	-0.396254	-0.827939	-1.66032	-0.0139493	4.17316	-3.32251	-1.8893	-1.32492	-0.987933	-2.29986	-1.83898	-1.35445	-1.78707	-2.72824	-0.958687	3.1914
4.57465e-85	1.43331e-83	ENSOARG00000003713	25:9356575-9438266	protein_coding	ACTN2	actinin, alpha 2 [Source:HGNC Symbol;Acc:164]	1.74313	-1.05091	4.28903	2.71339	1.20573	3.51354	0.550657	2.14959	1.58128	1.79497	10.7149	7.7316	424.951	-1.64752	-3.93271	1.12577	0	-1.65837	0.439467	-2.95134	-1.29855	-1.49542	-1.71481	7.497	-0.142837	-2.93687	2.40307	0.827429	-0.680238	1.62757	-1.33531	0.263622	-0.304683	-0.0909961	8.82897
6.43044e-85	2.01131e-83	ENSOARG00000020891	1:99844154-99853301	protein_coding	ANXA9	annexin A9 [Source:HGNC Symbol;Acc:547]	3.80297	-2.00718	-3.03979	-1.37	-3.97458	-5.24692	-4.33273	-2.45853	-3.46707	3.78596	-2.36262	1.55193	424.257	4.93727	-1.09683	-1.82105	0	-3.19959	-4.07101	-3.30683	-1.20686	-2.65518	5.11414	-1.24864	3.43337	-2.37679	-3.40939	-1.7396	-4.34419	-5.61653	-4.70234	-2.82814	-3.83668	3.41635	-2.73223
8.3787e-85	2.61619e-83	ENSOARG00000020472	1:195280159-195295348	protein_coding	CLDN1	Ovis aries claudin 1 (CLDN1), mRNA. [Source:RefSeq mRNA;Acc:NM_001185016]	6.58604	4.31447	6.42084	0.65072	1.53189	0.874255	1.44184	1.61538	0.475215	5.05645	-0.227306	4.80226	423.717	5.90056	3.47847	5.6671	0	0.692714	0.0227443	0.703995	0.921327	-0.463257	4.43053	-0.150337	7.23894	4.96737	7.07374	1.30362	2.18479	1.52716	2.09474	2.26828	1.12812	5.70936	0.425596
3.15235e-84	9.82616e-83	ENSOARG00000011321	3:8260726-8268916	protein_coding	AK1	Ovis aries adenylate kinase 1 (AK1), mRNA. [Source:RefSeq mRNA;Acc:NM_001161882]	0.145806	1.13618	1.33918	2.28742	1.96923	2.47067	2.66712	2.50108	0.610219	-1.14317	7.40626	4.55613	421.016	-1.93535	-1.28344	-0.755546	0	-0.448248	0.137558	0.457278	0.309908	-1.72578	-3.49762	5.21656	0.812382	1.80275	2.00576	2.954	2.6358	3.13724	3.3337	3.16765	1.2768	-0.476591	8.07283
4.16967e-84	1.29751e-82	ENSOARG00000007732	1:250255498-250255904	protein_coding			4.11728	2.51263	3.80167	-3.97884	-3.15367	-4.05724	-5.2769	-4.12223	-2.59114	-4.54485	-6.07322	2.11568	420.446	7.31882	5.79457	6.92342	0	0.0315125	-0.772487	-2.15579	-0.584174	0.442351	-0.898438	-4.02091	6.97454	5.36989	6.65893	-1.12158	-0.29641	-1.19998	-2.41964	-1.26498	0.266119	-1.68759	-3.21596
4.76532e-84	1.48034e-82	ENSOARG00000001611	2:136680840-136867566	protein_coding	SLC25A12	solute carrier family 25 (aspartate/glutamate carrier), member 12 [Source:HGNC Symbol;Acc:10982]	4.20362	4.02772	4.3898	4.12258	3.24399	4.1033	3.31624	3.54941	3.69535	2.97017	7.3538	4.99181	420.174	0.0713849	-0.306396	0.259819	0	-1.09059	-0.0667578	-0.826425	-0.587637	-0.472767	-1.23203	3.24083	2.98639	2.81048	3.17257	2.90534	2.02676	2.88607	2.09901	2.33218	2.47812	1.75294	6.13657
6.34814e-84	1.96868e-82	ENSOARG00000015298	3:19044119-19089445	protein_coding	GRHL1	grainyhead-like 1 (Drosophila) [Source:HGNC Symbol;Acc:17923]	7.01323	6.31508	6.33549	1.7712	2.21629	1.39392	0.0282303	0.370265	0.0919444	2.05849	0.562508	4.91348	419.589	5.09836	4.06394	4.42199	0	-0.037017	-0.787473	-1.62653	-1.0635	-2.05929	0.276177	-1.33888	6.09255	5.3944	5.41481	0.850523	1.29562	0.473249	-0.892444	-0.550409	-0.82873	1.13782	-0.358167
8.79447e-84	2.7227e-82	ENSOARG00000015536	18:25762371-25828153	protein_coding	KIAA1199	KIAA1199 [Source:HGNC Symbol;Acc:29213]	3.44982	6.07091	6.14441	0.462334	0.359061	1.52525	0.817203	0.45582	-0.900402	1.73337	-1.87279	3.88412	418.925	2.78727	5.60128	5.4867	0	-0.118781	0.74504	0.0936712	-0.192076	-1.53871	1.27677	-2.62664	1.41913	4.04022	4.11372	-1.56836	-1.67163	-0.505441	-1.21349	-1.57487	-2.93109	-0.297321	-3.90348
9.0713e-84	2.80365e-82	ENSOARG00000020524	1:97198475-97235884	protein_coding	FMO5	flavin containing monooxygenase 5 [Source:HGNC Symbol;Acc:3773]	4.61774	4.15945	4.64537	4.1655	6.76872	4.75043	5.27102	5.13558	4.2576	9.80282	2.71033	6.62649	418.861	0.493106	-0.00201247	0.514334	0	2.60776	0.562591	1.12073	1.02845	0.0610197	5.74831	-1.39783	3.81286	3.35457	3.84049	3.36062	5.96384	3.94555	4.46614	4.3307	3.45272	8.99794	1.90545
9.42241e-84	2.90724e-82	ENSOARG00000004430	11:34893011-34894294	protein_coding	KCNJ12	potassium inwardly-rectifying channel, subfamily J, member 12 [Source:HGNC Symbol;Acc:6258]	-2.40789	-3.42941	-1.62547	-4.37865	-2.2523	-1.94992	-0.247955	-2.57623	-6.07322	-0.412892	5.84667	2.79717	418.784	1.6079	0.735087	2.64588	0	1.98052	2.06393	3.79647	1.95185	-3.03066	4.09278	10.1881	-2.76854	-3.79006	-1.98612	-4.7393	-2.61295	-2.31056	-0.6086	-2.93687	-6.43387	-0.773537	5.48603
1.62877e-83	5.017e-82	ENSOARG00000003732	1:22444866-22469125	protein_coding			3.90048	-0.331807	1.32283	-6.07322	-3.97458	-6.07322	-6.07322	-5.31358	-6.07322	-6.07322	-6.07322	1.26411	417.668	11.0797	6.75908	8.51069	0	2.95077	-0.179266	0.162651	1.66689	-0.383826	0.40896	-0.111444	3.82187	-0.410417	1.24422	-6.15183	-4.05319	-6.15183	-6.15183	-5.39219	-6.15183	-6.15183	-6.15183
4.17773e-83	1.28467e-81	ENSOARG00000000709	AMGL01123413.1:21-2803	protein_coding			-6.07322	-3.42941	-6.07322	-6.07322	-0.519775	-6.07322	-6.07322	-6.07322	-6.07322	4.75038	-6.07322	1.05014	415.748	-0.0215143	3.01447	-0.0106339	0	6.02896	-0.419401	0.130331	-0.0333577	-0.312139	11.9375	0.08732	-7.23285	-4.58904	-7.23285	-7.23285	-1.6794	-7.23285	-7.23285	-7.23285	-7.23285	3.59075	-7.23285
1.25564e-82	3.85466e-81	ENSOARG00000019145	3:180247850-180254397	protein_coding	TST	thiosulfate sulfurtransferase (rhodanese) [Source:HGNC Symbol;Acc:12388]	2.30735	4.30881	9.06159	4.23261	5.67291	4.58154	4.18391	3.7421	1.81328	8.48581	3.21963	6.80003	413.504	-2.39443	-0.987674	4.35709	0	0.376753	-0.551485	-0.515297	-0.971435	-3.36831	3.94873	-1.4153	2.46901	4.47046	9.22325	4.39426	5.83456	4.7432	4.34556	3.90375	1.97494	8.64747	3.38129
2.49971e-82	7.66088e-81	ENSOARG00000012609	3:96210775-96216943	protein_coding			-6.07322	-6.07322	-6.07322	-6.07322	1.04456	-5.24692	-5.2769	-5.34937	-6.07322	5.19004	-6.07322	1.42624	412.099	0.0392554	-0.687846	0.0437486	0	7.42473	1.63594	1.77887	1.74128	-0.15007	12.1198	0.215066	-6.08901	-6.08901	-6.08901	-6.08901	1.02878	-5.26271	-5.29268	-5.36516	-6.08901	5.17425	-6.08901
3.62024e-82	1.10764e-80	ENSOARG00000005550	2:2398313-2404519	protein_coding			-6.07322	-6.07322	-6.07322	-6.07322	-6.07322	-6.07322	-5.51486	-6.07322	-6.07322	4.6912	-6.07322	0.812828	411.344	0.0211037	-0.149391	0.019411	0	-0.149391	-0.0628351	1.68366	0.0140093	0.0404014	11.6776	0.0538785	-4.91157	-4.91157	-4.91157	-4.91157	-4.91157	-4.91157	-4.35321	-4.91157	-4.91157	5.85285	-4.91157
7.65778e-82	2.33902e-80	ENSOARG00000000314	1:101645643-101651682	protein_coding			4.16553	-6.07322	-3.14484	-4.37865	-3.97458	-6.07322	-4.31925	-4.02043	-6.07322	-6.07322	-4.72552	1.34159	409.816	8.37359	-2.61249	0.94544	0	0.307059	-2.7556	-0.120653	0.348723	-2.89989	-3.02036	0.58256	1.80179	-8.43695	-5.50857	-6.74239	-6.33831	-8.43695	-6.68299	-6.38416	-8.43695	-8.43695	-7.08926
9.64781e-82	2.94194e-80	ENSOARG00000021083	1:101005530-101012642	protein_coding	TCHH	trichohyalin [Source:HGNC Symbol;Acc:11791]	11.8148	2.30068	6.58751	-1.43186	-6.07322	-4.62635	-5.2769	-2.68859	3.82288	-6.07322	-0.0847063	10.1733	409.345	14.1767	3.58316	8.00549	0	-5.78857	-2.68579	-3.93216	-1.26954	4.79335	-5.50171	2.13007	9.10841	-0.405742	3.88109	-4.13828	-8.77964	-7.33277	-7.98332	-5.39501	1.11646	-8.77964	-2.79113
1.11948e-81	3.40796e-80	ENSOARG00000016912	11:49799205-49803627	protein_coding	SLC16A3	solute carrier family 16 (monocarboxylate transporter), member 3 [Source:HGNC Symbol;Acc:10924]	1.33474	-0.331807	0.567542	1.46218	1.81783	2.23881	2.32584	1.45558	2.08954	0.873928	7.31486	4.38892	409.042	-0.124949	-2.08038	-0.84149	0	0.0797665	0.623957	0.808401	0.029558	0.431719	0.203399	5.82263	0.704332	-0.962213	-0.0628633	0.831776	1.18743	1.6084	1.69544	0.825176	1.45914	0.243522	6.68446
2.60967e-81	7.93122e-80	ENSOARG00000018068	24:36450665-36482827	protein_coding	CYP3A5		-1.83542	1.57418	1.3944	-1.97394	4.92097	-1.88568	-5.12906	-3.29251	-1.58573	7.93296	-6.07322	4.49878	407.315	-1.23587	1.83847	1.96049	0	5.18851	-1.73667	-4.68317	-1.59358	-1.53403	8.7651	-6.64366	-2.44329	0.966321	0.786537	-2.5818	4.31311	-2.49354	-5.73692	-3.90037	-2.1936	7.32509	-6.68109
3.43358e-81	1.04179e-79	ENSOARG00000012220	20:39777857-39837673	protein_coding	GMPR	guanosine monophosphate reductase [Source:HGNC Symbol;Acc:4376]	0.0204668	3.57823	3.22897	3.36932	3.1119	1.99929	3.32621	3.03546	2.62965	1.29927	7.94805	5.11681	406.756	-3.45366	0.0216286	-0.0133117	0	-0.445035	-1.2927	-0.11379	-0.291066	-0.657192	-2.38293	4.56206	-0.182421	3.37534	3.02608	3.16643	2.90902	1.7964	3.12332	2.83258	2.42676	1.09638	7.74516
4.02893e-81	1.22039e-79	ENSOARG00000020859	3:59952933-59960245	protein_coding	IL37	interleukin 37 [Source:HGNC Symbol;Acc:15563]	3.42831	-6.07322	-6.07322	-6.07322	-6.07322	-6.07322	-6.07322	-5.31358	-3.88017	-6.07322	-6.07322	1.04014	406.429	10.9311	1.48829	0.0520079	0	1.48829	1.23523	-0.242513	1.95255	4.03789	-0.224913	-0.105098	3.92852	-5.573	-5.573	-5.573	-5.573	-5.573	-5.573	-4.81337	-3.37995	-5.573	-5.573
4.55644e-81	1.37789e-79	ENSOARG00000007128	14:49272422-49280514	protein_coding			3.83644	8.42861	-5.3689	-4.49749	-6.07322	-4.29777	-5.09915	-3.07136	-5.00357	9.71779	-3.20883	6.59162	406.178	6.95892	12.3944	-2.65335	0	-3.10743	0.423511	-1.43394	0.954485	-1.70976	13.8286	0.459114	3.26598	7.85815	-5.93936	-5.06795	-6.64369	-4.86824	-5.66961	-3.64183	-5.57403	9.14733	-3.7793
4.58046e-81	1.38286e-79	ENSOARG00000019474	3:28791889-28797732	protein_coding	TDRD15	tudor domain containing 15 [Source:HGNC Symbol;Acc:45037]	-4.56801	-6.07322	-6.07322	-6.07322	-6.07322	-6.07322	-6.07322	-6.07322	-6.07322	2.4502	-6.07322	-1.25279	406.168	2.5314	-0.234163	-0.0334741	0	-0.234163	-0.258077	0.119717	-0.043793	-0.285414	9.69944	-0.00380478	-7.11497	-8.62018	-8.62018	-8.62018	-8.62018	-8.62018	-8.62018	-8.62018	-8.62018	-0.0967571	-8.62018
5.28451e-81	1.59278e-79	ENSOARG00000008138	5:39970692-39978361	protein_coding	LYPD8	LY6/PLAUR domain containing 8 [Source:HGNC Symbol;Acc:44208]	-6.07322	-6.07322	-3.25959	-1.75008	3.66587	8.11706	9.73914	7.48251	-6.07322	-6.07322	-5.03054	7.58649	405.876	-5.51533	-5.79844	-0.809557	0	4.93982	9.8365	11.5117	10.4983	-5.44199	-5.73639	-2.57865	-6.44394	-6.44394	-3.63031	-2.12081	3.29515	7.74634	9.36842	7.11179	-6.44394	-6.44394	-5.40126
5.62233e-81	1.6918e-79	ENSOARG00000009206	21:49881442-49882792	protein_coding	SCGB1C1	secretoglobin, family 1C, member 1 [Source:HGNC Symbol;Acc:18394]	-2.58272	0.504154	3.40895	-3.63527	-3.15367	-4.87186	-6.07322	-6.07322	-6.07322	-6.07322	-6.07322	0.742766	405.75	0.605441	3.06136	6.6658	0	-0.687522	-1.52736	-3.7568	-3.96185	-4.29505	-3.85369	-3.81892	-0.786857	2.30001	5.20481	-1.83941	-1.35781	-3.076	-4.27736	-4.27736	-4.27736	-4.27736	-4.27736
6.42045e-81	1.92878e-79	ENSOARG00000011303	11:45315251-45433964	protein_coding	MAPT	microtubule-associated protein tau [Source:HGNC Symbol;Acc:6893]	3.68927	2.71463	3.02426	0.636836	0.655485	1.04325	1.45936	1.83807	0.719897	0.122373	6.12898	3.52522	405.479	3.00707	2.07259	2.35953	0	0.00826544	0.433512	0.825749	1.18285	0.158719	-0.467682	5.46916	2.13837	1.16373	1.47336	-0.914065	-0.895415	-0.507646	-0.0915429	0.287172	-0.831004	-1.42853	4.57808
9.80777e-81	2.94152e-79	ENSOARG00000003742	6:99236188-99237187	pseudogene			6.809	7.49845	8.24573	7.13439	7.22081	7.05423	6.92607	6.99472	6.47103	7.56166	12.4955	9.69738	404.614	-0.292139	0.111485	1.10535	0	-0.166169	-0.263405	-0.205445	-0.152692	-0.849156	0.499496	5.35094	6.81479	7.50423	8.25151	7.14017	7.22659	7.06002	6.93185	7.0005	6.47681	7.56744	12.5013
1.08966e-80	3.26271e-79	ENSOARG00000020835	3:59778179-59795239	protein_coding	IL1F10	interleukin 1 family, member 10 (theta) [Source:HGNC Symbol;Acc:15552]	3.34107	-6.07322	-4.66273	-6.07322	-3.97458	-6.07322	-6.07322	-4.57949	-4.59047	-6.07322	-5.03054	0.504458	404.4	10.409	-0.193963	2.36162	0	2.72559	-0.219765	0.0993632	2.53887	2.77367	0.142818	2.78084	1.62255	-7.79175	-6.38126	-7.79175	-5.69311	-7.79175	-7.79175	-6.29802	-6.30899	-7.79175	-6.74906
1.2956e-80	3.873e-79	ENSOARG00000015018	3:170377920-170387993	protein_coding	SPIC	Spi-C transcription factor (Spi-1/PU.1 related) [Source:HGNC Symbol;Acc:29549]	-4.57752	-6.07322	-6.07322	-5.06132	-3.15367	-6.07322	-4.43345	-4.85632	5.79637	-3.19103	-6.07322	2.23945	404.046	0.0120114	-2.59398	-2.5619	0	1.22694	-2.55777	0.445472	0.541366	10.3658	3.1889	-2.55428	-4.15089	-5.6466	-5.6466	-4.63469	-2.72704	-5.6466	-4.00682	-4.4297	6.22299	-2.7644	-5.6466
1.48912e-80	4.4442e-79	ENSOARG00000013230	20:10297039-10349170	protein_coding	PNPLA1	patatin-like phospholipase domain containing 1 [Source:HGNC Symbol;Acc:21246]	4.82119	0.145894	-0.362146	-6.07322	-6.07322	-5.24692	-5.51486	-5.06111	-2.63257	-4.23098	-5.03054	1.96505	403.762	11.8932	7.0447	7.06239	0	-0.164701	1.87756	1.80326	2.59372	4.65314	3.99554	2.76871	3.80612	-0.869175	-1.37722	-7.08829	-7.08829	-6.26199	-6.52993	-6.07618	-3.64764	-5.24605	-6.04561
2.79182e-80	8.31845e-79	ENSOARG00000006727	23:62117011-62125799	protein_coding	SERPINB3/4-like1	serpin B4-like	-2.38247	1.03001	9.69819	-1.71311	-0.0144477	-2.1606	-3.37413	-5.03254	-2.30793	-1.10381	-3.69901	6.72309	402.48	-0.263254	0.906041	11.068	0	-0.144025	-1.31377	-0.945485	-3.21389	0.478309	-0.486234	-1.57444	-2.98465	0.427841	9.09602	-2.31528	-0.61662	-2.76277	-3.97631	-5.63471	-2.9101	-1.70598	-4.30118
2.85144e-80	8.48221e-79	ENSOARG00000009250	24:27446741-27473467	protein_coding	ITGAD	integrin, alpha D [Source:HGNC Symbol;Acc:6146]	-0.404122	3.85191	-1.05479	1.30374	4.0525	2.16476	2.56014	0.368637	6.9986	0.912402	0.813481	3.74997	402.437	-1.78031	2.14608	-2.49341	0	2.34677	0.581368	1.17349	-1.07299	5.39674	-0.371193	-0.515921	-2.20445	2.05158	-2.85512	-0.496595	2.25217	0.364425	0.759808	-1.43169	5.19827	-0.887929	-0.986849
3.56582e-80	1.059e-78	ENSOARG00000016319	3:132365704-132368208	protein_coding	HOXC9	Homeobox protein Hox-C9 [Source:UniProtKB/Swiss-Prot;Acc:Q28601]	1.98448	-6.07322	-0.952083	-6.07322	-3.97458	-0.596814	-6.07322	-4.58974	-6.07322	-6.07322	3.71415	0.824419	401.981	9.10446	0.133227	6.25582	0	3.05278	6.6312	-0.0419592	2.58219	0.123568	-0.0463179	10.8743	2.32091	-5.73679	-0.615656	-5.73679	-3.63815	-0.260386	-5.73679	-4.25331	-5.73679	-5.73679	4.05057
3.76007e-80	1.11488e-78	ENSOARG00000009965	1:110769426-110774370	protein_coding	NR1I3	nuclear receptor subfamily 1, group I, member 3 [Source:HGNC Symbol;Acc:7969]	-5.33311	-6.07322	-4.14976	-5.33932	2.21629	-4.62635	-5.2769	-6.07322	-6.07322	4.79641	-6.07322	1.18692	401.873	0.165381	-2.5542	1.57659	0	6.73301	1.19272	-0.025366	-1.71852	-1.77519	9.79882	-1.455	-5.62117	-6.36129	-4.43782	-5.62738	1.92823	-4.91441	-5.56496	-6.36129	-6.36129	4.50835	-6.36129
5.6437e-80	1.67066e-78	ENSOARG00000000738	AMGL01126506.1:21-7684	protein_coding			-5.31763	-2.54971	-0.157501	-2.4507	-0.164048	-3.06756	-5.26342	-4.30869	-6.07322	4.86514	-6.07322	1.57681	401.044	-2.84213	-0.572192	2.3506	0	1.86555	-1.0979	-1.94713	-1.59993	-4.92479	7.65673	-4.53889	-4.83162	-2.0637	0.328503	-1.9647	0.321956	-2.58156	-4.77741	-3.82269	-5.58722	5.35115	-5.58722
6.2546e-80	1.8485e-78	ENSOARG00000000406	1:102273372-102289222	protein_coding	PGLYRP4	peptidoglycan recognition protein 4 [Source:HGNC Symbol;Acc:30015]	1.84764	4.54396	4.54657	-3.92417	-0.992966	-5.24692	-1.40569	-2.08992	-0.964165	-6.07322	-6.07322	2.2115	400.834	5.50078	7.37207	8.04038	0	1.81411	-1.96792	2.10422	1.65483	2.37529	-3.8181	-3.5243	1.67772	4.37404	4.37665	-4.0941	-1.16289	-5.41685	-1.57562	-2.25985	-1.13409	-6.24315	-6.24315
6.44718e-80	1.90233e-78	ENSOARG00000009438	14:51709732-51711208	protein_coding	APOE	apolipoprotein E [Source:HGNC Symbol;Acc:613]	4.35927	4.20894	2.78018	5.83864	5.72437	6.32335	5.55864	5.44413	5.75272	10.8887	3.96219	7.51833	400.772	-1.66038	-2.03832	-3.31058	0	-0.522515	0.0696565	-0.475578	-0.645767	-0.478726	4.8964	-2.08926	4.42721	4.27688	2.84812	5.90657	5.79231	6.39129	5.62657	5.51207	5.82066	10.9567	4.03013
7.97915e-80	2.35056e-78	ENSOARG00000011753	20:20802466-20828101	protein_coding	GPR115	G protein-coupled receptor 115 [Source:HGNC Symbol;Acc:19011]	6.44965	5.16199	5.84521	0.551967	-6.07322	-6.07322	-5.51486	-6.07322	-4.94983	-6.07322	-5.03054	4.28837	400.337	4.95543	3.63854	4.3343	0	-8.59638	-8.98004	-6.87152	-8.93687	-7.17573	-8.20668	-6.29464	4.00737	2.71971	3.40293	-1.89031	-8.5155	-8.5155	-7.95714	-8.5155	-7.39211	-8.5155	-7.47282
8.56971e-80	2.52046e-78	ENSOARG00000004279	14:42562776-42592521	protein_coding	SLC7A9	solute carrier family 7 (amino acid transporter light chain, bo,+ system), member 9 [Source:HGNC Symbol;Acc:11067]	-3.83152	-3.42941	-5.36705	-4.95026	3.86246	-2.42341	-5.2769	-6.07322	-1.94605	5.18409	-6.07322	1.71386	400.192	1.07305	0.665906	-0.957823	0	8.07734	1.9227	-0.648049	-2.62857	2.19933	10.1126	-2.58623	-4.48687	-4.08476	-6.02241	-5.60561	3.20711	-3.07876	-5.93225	-6.72857	-2.6014	4.52873	-6.72857
1.94203e-79	5.70257e-78	ENSOARG00000012562	7:23492113-23492559	protein_coding			1.76571	4.86281	4.51759	-4.53839	-6.07322	-5.24692	-5.51486	-6.07322	-5.00357	-4.08955	-6.07322	2.28321	398.522	5.36164	7.81756	8.03418	0	-4.1181	-2.06244	-1.79546	-3.79784	-1.96654	0.234333	-3.73088	2.92737	6.02446	5.67924	-3.37673	-4.91157	-4.08527	-4.35321	-4.91157	-3.84191	-2.92789	-4.91157
2.47602e-79	7.25887e-78	ENSOARG00000016372	6:90517575-90662421	protein_coding	ART3	ADP-ribosyltransferase 3 [Source:HGNC Symbol;Acc:725]	-1.28274	-0.647009	1.60239	0.057795	-1.95094	0.386447	-1.02876	-0.966161	0.634433	0.196728	7.2077	4.24134	398.026	-1.36995	0.285544	2.37462	0	-1.04354	0.767062	-0.857304	-0.851854	1.09831	0.327053	7.32074	-1.60928	-0.973547	1.27585	-0.268742	-2.27748	0.05991	-1.3553	-1.2927	0.307896	-0.129809	6.88116
2.7352e-79	8.00585e-78	ENSOARG00000018105	13:58655371-58662719	protein_coding	TFAP2C	transcription factor AP-2 gamma (activating enhancer binding protein 2 gamma) [Source:HGNC Symbol;Acc:11744]	3.44313	3.0359	0.72476	-6.07322	-6.07322	-4.51444	-4.97693	-5.34937	-6.07322	-6.07322	-6.07322	1.00826	397.823	10.5428	9.86489	7.84631	0	-0.242933	2.12866	3.29331	1.76035	-0.0611291	-0.0487098	0.0600876	3.33611	2.92888	0.617742	-6.18024	-6.18024	-4.62145	-5.08395	-5.45639	-6.18024	-6.18024	-6.18024
4.23019e-79	1.23618e-77	ENSOARG00000008708	5:3762296-3768650	protein_coding	TM6SF2	transmembrane 6 superfamily member 2 [Source:HGNC Symbol;Acc:11861]	-6.07322	-6.07322	-5.3689	-4.22725	5.16793	-2.34288	-3.06008	-3.35404	-5.00357	4.38395	-2.36168	1.65187	396.933	-3.04698	-3.5836	-1.353	0	8.65726	1.65088	0.905849	1.44764	-1.04188	8.28635	1.74018	-6.25082	-6.25082	-5.5465	-4.40485	4.99034	-2.52047	-3.23768	-3.53164	-5.18117	4.20635	-2.53928
4.84168e-79	1.41261e-77	ENSOARG00000017105	11:41277222-41284786	protein_coding	KRT14	keratin 14 [Source:HGNC Symbol;Acc:6416]	10.541	7.80043	10.715	1.33488	1.04456	0.399071	2.84162	1.24809	-4.59047	-3.95745	-3.70938	8.60742	396.658	8.61899	5.49848	8.78865	0	-1.26255	-1.47806	0.942641	0.66752	-6.13776	-4.79192	-5.23611	8.2538	5.51326	8.42784	-0.952298	-1.24262	-1.88811	0.55444	-1.03909	-6.87764	-6.24462	-5.99656
6.01479e-79	1.75207e-77	ENSOARG00000010995	13:53465401-53465913	protein_coding			5.75689	5.84689	5.54518	5.49565	5.49404	5.44614	5.86847	5.92873	4.88277	5.17498	9.1259	6.74592	396.215	0.263076	0.338334	0.0657862	0	-0.0145669	-0.0637649	0.383506	0.431983	-0.632125	-0.310351	3.63697	7.29222	7.38222	7.08051	7.03098	7.02937	6.98147	7.4038	7.46406	6.4181	6.71031	10.6612
6.26495e-79	1.82203e-77	ENSOARG00000001636	1:220311409-220425966	protein_coding	SI	sucrase-isomaltase (alpha-glucosidase) [Source:HGNC Symbol;Acc:10856]	-3.8279	-6.07322	-5.3689	-6.07322	5.7363	4.29799	6.60532	-0.712336	-5.00357	-6.07322	-5.03054	4.00206	396.132	3.39847	1.15953	1.92515	0	13.9689	12.6043	14.3909	8.58111	3.28088	-0.315803	2.97222	-6.39422	-8.63955	-7.93523	-8.63955	3.16997	1.73166	4.03899	-3.27866	-7.5699	-8.63955	-7.59686
6.92523e-79	2.01085e-77	ENSOARG00000010115	25:35214535-35222729	protein_coding	CGN1	Conglutinin 1 [Source:UniProtKB/TrEMBL;Acc:I0CF13]	-6.07322	-6.07322	-5.36705	-6.07322	-3.97458	-5.24692	-6.07322	-6.07322	-6.07322	4.91713	-6.07322	1.11728	395.927	0.057292	-0.061196	1.71219	0	2.85836	2.17405	-0.085539	0.0472112	0.273678	11.8194	0.0757413	-5.94979	-5.94979	-5.24362	-5.94979	-3.85115	-5.12349	-5.94979	-5.94979	-5.94979	5.04056	-5.94979
7.42684e-79	2.15308e-77	ENSOARG00000010466	20:19239137-19401884	protein_coding	CLIC5	chloride intracellular channel 5 [Source:HGNC Symbol;Acc:13517]	-0.95681	-1.05091	-0.0107281	2.19281	5.97196	3.23432	3.30903	3.0087	3.75555	1.06418	6.05552	3.87112	395.785	-3.21245	-3.55824	-2.25164	0	3.48682	0.949415	1.06097	0.756657	1.41034	-1.24359	3.76801	-1.34086	-1.43496	-0.394778	1.80876	5.58791	2.85027	2.92498	2.62465	3.3715	0.680132	5.67147
7.70742e-79	2.23087e-77	Addition27	1:101670783-101671110		LCE1-like7P		3.22852	-6.07322	-6.07322	-6.07322	-6.07322	-6.07322	-6.07322	-6.07322	-6.07322	-6.07322	-6.07322	0.458213	395.709	10.4448	0.319145	0.0455055	0	0.319145	0.38175	-0.133579	0.0566445	0.454773	-0.196149	0.00735628	4.84116	-4.46058	-4.46058	-4.46058	-4.46058	-4.46058	-4.46058	-4.46058	-4.46058	-4.46058	-4.46058
8.01194e-79	2.31534e-77	ENSOARG00000000461	13:21174224-21289099	protein_coding	NEBL	nebulette [Source:HGNC Symbol;Acc:16932]	5.6828	5.91931	5.40643	3.33569	2.96649	1.28578	0.996645	1.46246	1.76904	0.830266	1.9336	4.07757	395.63	2.27705	2.24157	1.99609	0	-0.712445	-2.34238	-2.36335	-1.86395	-1.85123	-2.44455	-1.46439	4.07493	4.31145	3.79856	1.72783	1.35863	-0.322082	-0.611218	-0.145399	0.161173	-0.777597	0.32574
1.17216e-78	3.38203e-77	ENSOARG00000015565	16:70469222-70473830	protein_coding	LRRC14B	leucine rich repeat containing 14B [Source:HGNC Symbol;Acc:37268]	-5.33311	-6.07322	-4.57895	-5.38472	-6.07322	-6.07322	-6.07322	-6.07322	-6.07322	-6.07322	4.52559	0.967442	394.853	0.0972324	-0.928594	2.02222	0	-0.928594	-0.871181	-1.94481	-1.62339	-0.806245	-2.024	10.3653	-5.74345	-6.48356	-4.98929	-5.79506	-6.48356	-6.48356	-6.48356	-6.48356	-6.48356	-6.48356	4.11525
1.1833e-78	3.40877e-77	ENSOARG00000003055	25:45303043-45309821	protein_coding	AGT	angiotensinogen (serpin peptidase inhibitor, clade A, member 8) [Source:HGNC Symbol;Acc:333]	-1.93516	0.336116	-2.55411	0.89125	6.22048	1.83424	3.00411	3.10979	-3.04737	9.71453	0.0654686	6.13464	394.834	-2.32273	-0.615057	-3.43615	0	5.27767	0.759558	2.43534	2.14237	-4.25656	8.76957	-0.680415	-2.56649	-0.295221	-3.18545	0.259913	5.58914	1.20291	2.37277	2.47845	-3.67871	9.08319	-0.565869
2.25175e-78	6.47644e-77	ENSOARG00000000111	12:78933863-78935736	protein_coding	SHISA4	shisa family member 4 [Source:HGNC Symbol;Acc:27139]	0.976882	0.654646	-2.05741	-0.771846	-0.624329	0.212425	-0.544894	0.844406	-1.58573	0.121667	6.36221	3.24097	393.521	1.19479	0.682476	-1.43396	0	-0.606288	0.267267	-0.297753	1.15468	-1.64314	0.426613	6.51321	2.00898	1.68674	-1.02531	0.260247	0.407764	1.24452	0.4872	1.8765	-0.553639	1.15376	7.39431
2.25727e-78	6.4821e-77	ENSOARG00000010661	13:42669234-42688289	protein_coding	AKR1C1		-2.63689	-0.331807	5.34423	-1.92914	-0.859345	-4.44351	-4.25568	-4.31298	-6.07322	1.26158	-1.17272	2.57039	393.516	-1.95682	0.126978	6.34822	0	-0.406581	-2.95301	-2.80618	-3.37738	-6.73131	2.35508	-0.126157	-2.62675	-0.321673	5.35437	-1.919	-0.84921	-4.43338	-4.24555	-4.30284	-6.06309	1.27172	-1.16258
3.07013e-78	8.8025e-77	ENSOARG00000020433	1:192150191-192276258	protein_coding	ATP13A4	ATPase type 13A4 [Source:HGNC Symbol;Acc:25422]	4.59735	4.41808	-6.07322	-5.33932	-3.97458	-5.24692	-6.07322	-3.20716	-6.07322	-6.07322	-3.22048	2.07266	392.888	9.94343	9.54858	-1.81815	0	0.977335	0.0653828	-1.66626	3.23431	-2.06537	-1.58389	3.01672	2.7255	2.54623	-7.94507	-7.21116	-5.84642	-7.11877	-7.94507	-5.079	-7.94507	-7.94507	-5.09233
3.5139e-78	1.0059e-76	ENSOARG00000018803	X:65709703-65731937	protein_coding	PGK1	Ovis aries phosphoglycerate kinase 1 (PGK1), mRNA. [Source:RefSeq mRNA;Acc:NM_001142516]	5.88204	6.10235	6.76925	5.86623	6.3717	5.69271	5.39599	5.69356	5.4745	6.23457	9.90834	7.47709	392.612	0.000496314	-0.0582243	0.900926	0	0.211147	-0.353316	-0.479327	-0.179602	-0.570207	0.394265	4.08714	5.36199	5.58231	6.2492	5.34618	5.85165	5.17266	4.87595	5.17352	4.95445	5.71453	9.38829
3.79271e-78	1.08401e-76	ENSOARG00000001346	21:43406693-43408007	protein_coding	CST6	cystatin E/M [Source:HGNC Symbol;Acc:2478]	9.02839	3.0359	2.70934	0.480799	0.61012	0.810838	1.94822	3.10912	-0.0464478	-0.657911	3.55273	6.09203	392.456	8.50491	2.44063	2.15191	0	0.00911428	0.212589	1.39312	3.8647	-0.640647	-1.196	3.0092	10.1804	4.18791	3.86134	1.6328	1.76212	1.96284	3.10022	4.26112	1.10556	0.494092	4.70473
8.82772e-78	2.51915e-76	ENSOARG00000018134	15:31260633-31281219	protein_coding			-6.07322	-6.07322	-6.07322	-6.07322	-6.07322	-6.07322	-6.07322	-6.07322	-6.07322	3.69632	-6.07322	1.06087	390.732	-0.0467756	-0.987172	-0.0203061	0	-0.987172	-0.828403	0.316841	-0.0735256	-0.626976	11.7744	0.203089	-6.9051	-6.9051	-6.9051	-6.9051	-6.9051	-6.9051	-6.9051	-6.9051	-6.9051	2.86444	-6.9051
8.9724e-78	2.55643e-76	ENSOARG00000016989	3:133710120-133871384	protein_coding	KRT85/LOC101112805	cow ortho keratin85	5.0011	-3.42941	-4.14976	-6.07322	-6.07322	-6.07322	-6.07322	-6.07322	-6.07322	-6.07322	-4.72552	3.36408	390.698	12.8688	3.29124	3.6848	0	-0.23227	-0.443953	0.308778	-0.119675	-0.641692	0.64365	3.42904	4.42482	-4.00569	-4.72604	-6.6495	-6.6495	-6.6495	-6.6495	-6.6495	-6.6495	-6.6495	-5.3018
1.03147e-77	2.9343e-76	ENSOARG00000005461	19:59365915-59409101	protein_coding	KBTBD12	kelch repeat and BTB (POZ) domain containing 12 [Source:HGNC Symbol;Acc:25731]	0.4499	-3.42941	2.33964	0.928228	-3.97458	0.164135	-1.65369	-0.436209	0.422221	1.3806	7.91805	4.93178	390.414	-0.615997	-4.49859	1.50261	0	-5.10255	-0.944207	-2.60504	-1.66262	-0.694928	0.15329	6.84889	-0.878362	-4.75767	1.01138	-0.400034	-5.30284	-1.16413	-2.98195	-1.76447	-0.906041	0.0523366	6.58979
1.46865e-77	4.17146e-76	ENSOARG00000013541	17:70586629-70594240	protein_coding	GSTT1	glutathione S-transferase theta 1 [Source:HGNC Symbol;Acc:4641]	0.0797626	1.13618	-1.87468	0.8213	1.1112	-0.240313	1.15224	1.196	0.803656	8.08045	1.53499	4.4856	389.692	-0.751386	0.341358	-1.35599	0	0.316296	-0.849335	0.212228	0.315865	0.0745674	7.11036	0.685748	-1.60685	-0.550434	-3.56129	-0.865313	-0.57541	-1.92693	-0.534377	-0.490614	-0.882957	6.39384	-0.151623
1.58069e-77	4.48272e-76	ENSOARG00000005808	14:47662818-47674295	protein_coding	CAPN12	calpain 12 [Source:HGNC Symbol;Acc:13249]	3.16622	-3.42941	-3.09393	-4.65081	-3.97458	-6.07322	-5.2769	-6.07322	-6.07322	-6.07322	-6.07322	1.39686	389.542	8.2206	0.317481	1.30741	0	-0.28648	-3.29192	-0.664352	-2.83383	-3.38199	-2.20027	-2.76534	2.09172	-4.50392	-4.16843	-5.72532	-5.04909	-7.14773	-6.3514	-7.14773	-7.14773	-7.14773	-7.14773
1.82453e-77	5.1662e-76	ENSOARG00000010773	9:29448173-29466388	protein_coding	FAM83A	family with sequence similarity 83, member A [Source:HGNC Symbol;Acc:28210]	-1.37509	1.61147	4.2469	-4.88629	-3.15367	-5.24692	-4.99181	-4.85632	-6.07322	1.50442	-6.07322	1.61216	389.249	3.11267	5.02873	8.50844	0	0.168459	-1.34266	-0.422538	0.283985	-3.14853	5.59643	-2.7533	-1.76245	1.22411	3.85953	-5.27365	-3.54103	-5.63429	-5.37917	-5.24369	-6.46058	1.11706	-6.46058
2.49749e-77	7.06073e-76	ENSOARG00000009146	2:36687555-36688184	protein_coding	CCL27	chemokine (C-C motif) ligand 27 [Source:HGNC Symbol;Acc:10626]	4.32692	-2.00718	-2.29692	-1.82368	-2.63371	-3.70308	-3.58825	-1.82361	-2.78635	-1.97377	-3.381	1.56345	388.608	6.17875	-0.179894	-0.50672	0	-0.830767	-0.0211969	-1.07595	-0.0566203	-0.876457	-0.365801	-0.431685	6.06389	-0.270217	-0.559949	-0.0867116	-0.896743	-1.96612	-1.85129	-0.0866482	-1.04938	-0.236806	-1.64404
2.58756e-77	7.30405e-76	ENSOARG00000002007	13:50815756-50832664	protein_coding	SIGLEC1	sialic acid binding Ig-like lectin 1, sialoadhesin [Source:HGNC Symbol;Acc:11127]	-0.24005	0.244138	1.27402	3.03507	3.92863	2.37064	4.03878	3.28236	6.05058	6.05013	-1.42108	4.03555	388.536	-3.2224	-3.41665	-1.80539	0	0.276214	-0.72457	0.985508	0.171939	2.96042	2.70917	-4.3386	-2.62189	-2.1377	-1.10782	0.653232	1.54679	-0.0111947	1.65694	0.900523	3.66874	3.66829	-3.80292
2.68528e-77	7.56818e-76	ENSOARG00000005410	2:1904862-1923764	protein_coding	COLEC11	collectin sub-family member 11 [Source:HGNC Symbol;Acc:17213]	-6.07322	-2.54971	-2.191	-2.45052	-6.07322	-4.51444	-4.0023	-5.06111	-0.0406386	5.68804	-6.07322	1.93726	388.46	-4.85153	-0.299833	0.476644	0	-4.75921	-2.62206	-0.756564	-2.24689	2.08894	8.10875	-4.86778	-5.85731	-2.33379	-1.97509	-2.23461	-5.85731	-4.29852	-3.78639	-4.8452	0.175276	5.90396	-5.85731
2.74684e-77	7.72973e-76	ENSOARG00000001172	15:24567161-24585961	protein_coding	NXPE4	neurexophilin and PC-esterase domain family, member 4 [Source:HGNC Symbol;Acc:23117]	0.511093	5.71605	-1.56861	0.924349	0.901264	4.13926	7.62952	5.23537	1.47884	0.808546	-0.146587	5.24032	388.414	-0.437384	4.65013	-2.55288	0	-0.170201	3.46379	6.79358	5.13345	0.828376	-0.465142	-1.08393	-2.13875	3.06621	-4.21845	-1.7255	-1.74858	1.48942	4.97968	2.58552	-1.171	-1.8413	-2.79643
3.69529e-77	1.03827e-75	ENSOARG00000024295	5:46731102-46731182	miRNA			-6.07322	-6.07322	-6.07322	-6.07322	-6.07322	-6.07322	-6.07322	-6.07322	-6.07322	-6.07322	3.51867	0.170506	387.808	-0.07	0.766344	-0.0636233	0	0.766344	0.288401	0.0376272	-0.0449333	-0.10919	0.35652	10.6539	-2.44729	-2.44729	-2.44729	-2.44729	-2.44729	-2.44729	-2.44729	-2.44729	-2.44729	-2.44729	7.1446
3.91681e-77	1.09882e-75	ENSOARG00000002786	JH922974.1:5798-7187	protein_coding	MUC5AC	mucin 5AC, oligomeric mucus/gel-forming [Source:HGNC Symbol;Acc:7515]	-4.56801	6.64681	-5.36705	6.42263	-0.859345	-4.62635	-5.26342	-6.07322	-5.00357	-6.07322	-6.07322	5.26764	387.689	-12.2852	-1.90067	-13.2161	0	-9.42628	-12.2169	-11.5971	-14.8533	-13.2452	-14.6235	-14.6623	-4.66157	6.55325	-5.46061	6.32907	-0.952905	-4.71991	-5.35698	-6.16678	-5.09713	-6.16678	-6.16678
7.3687e-77	2.06403e-75	ENSOARG00000020498	1:198236799-198300463	protein_coding	MASP1	mannan-binding lectin serine peptidase 1 (C4/C2 activating component of Ra-reactive factor) [Source:HGNC Symbol;Acc:6901]	2.22046	2.38923	-1.71474	-1.78157	1.37801	0.547976	0.552902	2.07422	-1.17175	7.70919	3.49994	4.25135	386.399	3.49577	3.32917	-0.237607	0	2.31587	1.68233	1.74884	3.46397	-0.0435261	8.87108	4.66751	0.671039	0.839805	-3.26417	-3.33099	-0.171417	-1.00145	-0.996521	0.524799	-2.72117	6.15977	1.95052
1.1821e-76	3.30607e-75	ENSOARG00000010135	12:35248556-35387084	protein_coding	F5	coagulation factor V (proaccelerin, labile factor) [Source:HGNC Symbol;Acc:3542]	4.13005	4.69925	3.54292	4.69801	4.48513	5.11856	5.21936	5.10015	4.43437	10.2085	2.65461	6.83208	385.434	-0.713413	-0.297685	-1.29846	0	-0.511871	0.271969	0.384189	0.508834	-0.412342	5.28582	-2.19558	1.23436	1.80356	0.64723	1.80232	1.58944	2.22287	2.32366	2.20446	1.53868	7.31276	-0.241077
1.22386e-76	3.41764e-75	ENSOARG00000014100	3:104347513-104362161	protein_coding	PROM2	prominin 2 [Source:HGNC Symbol;Acc:20685]	5.74417	4.92708	6.22599	1.0181	-0.992966	-3.45982	-3.68877	-3.88596	-5.00357	-6.07322	-6.07322	4.11516	385.363	3.92033	2.06495	4.36582	0	-3.87622	-4.25104	-4.86508	-5.43838	-7.38284	-9.22038	-8.97431	4.29791	3.48082	4.77973	-0.42816	-2.43922	-4.90607	-5.13502	-5.33221	-6.44982	-7.51948	-7.51948
2.00273e-76	5.58406e-75	ENSOARG00000014168	18:57433067-57466054	protein_coding	ASB2	ankyrin repeat and SOCS box containing 2 [Source:HGNC Symbol;Acc:16012]	1.5847	1.37174	6.00424	3.90733	3.64353	3.54251	2.91152	3.53507	2.6164	-0.450827	9.25998	6.44666	384.357	-2.71128	-2.59219	1.75898	0	-0.317107	-0.402481	-1.31382	-0.663089	-1.33561	-4.44721	5.12495	0.580378	0.367418	4.99991	2.90301	2.63921	2.53819	1.9072	2.53075	1.61208	-1.45515	8.25566
2.48165e-76	6.90883e-75	ENSOARG00000000291	17:2703888-2715375	protein_coding	FGB	Fibrinogen beta chain Fibrinopeptide B [Source:UniProtKB/Swiss-Prot;Acc:P68116]	-1.16531	4.62825	-1.63712	0.130219	-2.63371	-2.1443	-1.86551	-0.223383	-0.711137	13.8918	0.302672	10.2667	383.919	-1.3492	6.07803	-0.816554	0	-1.25157	-0.77268	-1.82226	0.338787	-0.100316	14.8922	0.311001	-3.67678	2.11678	-4.14859	-2.38125	-5.14518	-4.65577	-4.37698	-2.73485	-3.2226	11.3803	-2.2088
3.90895e-76	1.08658e-74	ENSOARG00000015168	24:35432755-35438155	protein_coding	MOGAT3-like	human ortho MOGAT3	4.76972	-6.07322	-6.07322	-4.93982	-6.07322	-5.24692	-6.07322	-4.54253	-6.07322	-1.01485	-6.07322	1.9303	382.991	8.98442	-2.95055	-3.01687	0	-2.95055	-0.911406	-3.01897	0.964761	-3.00093	3.09773	-3.02852	3.05514	-7.7878	-7.7878	-6.6544	-7.7878	-6.9615	-7.7878	-6.2571	-7.7878	-2.72943	-7.7878
4.48217e-76	1.24402e-74	ENSOARG00000005504	18:40457701-40470054	protein_coding	COCH	cochlin [Source:HGNC Symbol;Acc:2180]	3.57143	3.1029	-5.09255	-3.09353	-0.0873097	-3.50234	-2.14689	0.769706	8.49543	-4.23098	-3.0873	4.97108	382.712	6.11052	5.95934	-2.31545	0	2.75895	1.1327	1.33376	3.37974	11.1863	-1.38818	-0.0911067	2.84112	2.37258	-5.82286	-3.82385	-0.817624	-4.23266	-2.8772	0.0393922	7.76512	-4.96129	-3.81762
4.60335e-76	1.27572e-74	ENSOARG00000005049	1:237003297-237050085	protein_coding	CP	Ovis aries ceruloplasmin (ferroxidase) (CP), mRNA. [Source:RefSeq mRNA;Acc:NM_001009733]	-0.931739	3.90544	-4.15184	1.49136	-0.519775	0.190151	0.498672	0.575699	6.89554	11.9345	-4.7417	8.30665	382.657	-1.80203	1.44264	-5.63098	0	-2.9973	-1.66191	-1.29034	-0.716316	5.069	9.76403	-5.34508	-2.60981	2.22736	-5.82992	-0.186716	-2.19785	-1.48792	-1.1794	-1.10237	5.21747	10.2565	-6.41977
5.21457e-76	1.44291e-74	ENSOARG00000015971	24:20160197-20173772	protein_coding	IGSF6	immunoglobulin superfamily, member 6 [Source:HGNC Symbol;Acc:5953]	0.291387	-0.0732743	-0.272442	1.43079	3.09554	2.48861	2.50738	1.71585	6.29843	3.55033	-0.626109	3.29716	382.403	-1.19491	-1.4619	-1.75141	0	1.71697	0.818381	0.979743	0.183541	4.63054	2.24072	-2.02654	-2.05117	-2.41583	-2.615	-0.911766	0.752983	0.146059	0.164829	-0.626708	3.95588	1.20778	-2.96866
1.61691e-75	4.46732e-74	ENSOARG00000021130	7:69797192-69805671	protein_coding	SIX4	SIX homeobox 4 [Source:HGNC Symbol;Acc:10890]	-0.116573	4.88582	-0.792728	0.868927	1.07827	-0.852349	-1.06463	-0.749015	-0.509338	-1.61455	6.45076	3.48304	380.091	-1.42411	3.1377	-1.63925	0	-0.674578	-2.22142	-2.45481	-2.05303	-1.72289	-3.16498	5.07915	-1.32259	3.6798	-1.99875	-0.337091	-0.127752	-2.05837	-2.27064	-1.95503	-1.71536	-2.82057	5.24474
1.73805e-75	4.79476e-74	ENSOARG00000003600	3:69651114-69819801	protein_coding	ACYP2	acylphosphatase 2, muscle type [Source:HGNC Symbol;Acc:180]	0.818099	1.3276	0.468948	0.777112	0.823898	0.75454	0.142917	1.38785	0.776021	1.3826	5.33075	2.49394	379.943	0.0309188	0.62826	-0.257251	0	0.122763	-0.0888946	-0.647715	0.652654	-0.120333	0.731124	4.53649	2.87699	3.3865	2.52784	2.83601	2.88279	2.81343	2.20181	3.44674	2.83491	3.44149	7.38964
1.88407e-75	5.18974e-74	ENSOARG00000008171	10:18125209-18216861	protein_coding	SUCLA2	succinate-CoA ligase, ADP-forming, beta subunit [Source:HGNC Symbol;Acc:11448]	5.19769	5.22651	5.82287	5.2153	5.67841	5.37013	5.25525	5.27123	4.74148	4.61615	9.01723	6.57814	379.779	0.0282134	-0.102771	0.598554	0	0.349211	0.0482218	0.0355609	0.0401542	-0.586993	-0.570904	3.80025	4.47785	4.50666	5.10303	4.49546	4.95857	4.65029	4.53541	4.55139	4.02164	3.89631	8.29739
1.90598e-75	5.24215e-74	ENSOARG00000008320	6:107292854-107295158	protein_coding			3.40289	3.83624	3.79068	4.27355	4.76414	3.6488	3.91208	4.27177	3.02798	8.59599	3.9458	5.52522	379.755	-0.823916	-0.554249	-0.453153	0	0.374004	-0.535955	-0.360786	0.0112241	-1.18436	4.32717	-0.310752	4.90107	5.33442	5.28886	5.77173	6.26232	5.14698	5.41025	5.76995	4.52616	10.0942	5.44398
2.19967e-75	6.04082e-74	ENSOARG00000007114	16:18549747-18578013	protein_coding	ELOVL7	ELOVL fatty acid elongase 7 [Source:HGNC Symbol;Acc:26292]	8.09826	4.20894	0.543452	2.3265	1.01005	2.39613	2.04537	3.27392	-0.350418	0.771444	2.65561	5.29557	379.462	5.92879	2.09855	-1.60604	0	-1.1051	0.311174	-0.0262016	1.15056	-2.49237	-1.57572	0.31388	6.04375	2.15444	-1.51105	0.271994	-1.04445	0.341631	-0.00913117	1.21942	-2.40492	-1.28306	0.601105
2.59751e-75	7.12264e-74	ENSOARG00000014864	1:221877400-221878572	protein_coding			5.24598	5.6414	7.16628	6.21166	6.10361	6.1406	6.07618	5.93863	4.85611	6.26299	9.88545	7.46537	379.123	-0.976876	-0.746333	0.945222	0	-0.284065	-0.147881	-0.124452	-0.283092	-1.43711	0.023255	3.7045	5.01578	5.4112	6.93608	5.98146	5.87341	5.9104	5.84597	5.70843	4.62591	6.03279	9.65524
4.57352e-75	1.25223e-73	ENSOARG00000007979	22:41355527-41392391	protein_coding	DMBT1	deleted in malignant brain tumors 1 [Source:HGNC Symbol;Acc:2926]	2.01853	8.27294	-1.30949	2.30139	12.3154	9.27748	2.76572	1.54929	0.942329	7.85219	-2.04446	8.115	377.967	-1.24641	4.57102	-4.17044	0	8.6135	5.76988	-0.467709	-1.48641	-2.57023	4.76106	-5.27889	0.28431	6.53872	-3.04371	0.567171	10.5812	7.54326	1.0315	-0.184929	-0.791893	6.11797	-3.77868
4.70473e-75	1.28622e-73	ENSOARG00000009492	3:162994529-162997712	protein_coding	COQ10A	coenzyme Q10 homolog A (S. cerevisiae) [Source:HGNC Symbol;Acc:26515]	0.671483	0.0404678	1.06282	1.79411	0.97469	0.311796	0.927422	1.04462	1.39875	1.05149	6.03989	3.17191	377.909	-1.12586	-1.93845	-0.759345	0	-0.999237	-1.56924	-0.958847	-0.721672	-0.492568	-0.792659	4.23393	1.11567	0.484652	1.50701	2.23829	1.41887	0.75598	1.37161	1.48881	1.84294	1.49567	6.48407
5.50757e-75	1.50345e-73	ENSOARG00000019021	11:24416202-24429550	protein_coding	UBE2G1	ubiquitin-conjugating enzyme E2G 1 [Source:HGNC Symbol;Acc:12482]	3.71613	4.15314	4.33754	4.13162	3.58025	3.66394	3.58801	3.47271	4.08246	4.30586	7.28832	4.9551	377.587	-0.401358	0.0873059	0.209561	0	-0.485877	-0.398718	-0.534283	-0.656787	-0.00137352	0.174904	3.15734	4.81155	5.24856	5.43296	5.22704	4.67567	4.75936	4.68343	4.56813	5.17788	5.40128	8.38374
6.00509e-75	1.63681e-73	ENSOARG00000000664	18:29603455-29673026	protein_coding	ACSBG1	acyl-CoA synthetase bubblegum family member 1 [Source:HGNC Symbol;Acc:29567]	6.83318	5.39102	-2.13521	-3.12798	-3.15367	-1.05186	-2.7421	-1.40745	-3.88017	-1.69683	-4.42369	3.99042	377.411	8.73256	7.54025	-0.418319	0	-1.10281	1.13624	-0.876677	1.02025	-1.99873	-0.169901	-1.14626	5.12477	3.68261	-3.84362	-4.83639	-4.86208	-2.76027	-4.4505	-3.11586	-5.58858	-3.40524	-6.1321
6.16015e-75	1.67657e-73	ENSOARG00000015390	6:25339921-25358698	protein_coding			3.07317	4.44931	7.13527	-1.70581	8.35999	-3.06756	-3.80644	-3.68117	-6.07322	10.811	-3.381	7.73706	377.358	3.08157	2.83363	6.88759	0	6.74477	-4.11449	-3.3833	-3.48614	-7.99139	10.1546	-2.1889	2.88793	4.26407	6.95004	-1.89104	8.17476	-3.25279	-3.99167	-3.8664	-6.25845	10.6258	-3.56623
8.72026e-75	2.36981e-73	ENSOARG00000004962	8:88617048-88645344	protein_coding	UNC93A	unc-93 homolog A (C. elegans) [Source:HGNC Symbol;Acc:12570]	1.90039	1.41457	0.33835	-5.38472	0.61012	-6.07322	-5.51486	-6.07322	-6.07322	-6.07322	3.65202	1.15932	376.648	7.37987	6.20497	5.73001	0	5.39752	-2.31973	0.1272	-1.95028	-2.36449	-1.55472	9.00955	1.18934	0.703511	-0.372704	-6.09577	-0.100934	-6.78428	-6.22592	-6.78428	-6.78428	-6.78428	2.94096
9.55095e-75	2.59169e-73	ENSOARG00000015338	24:35566027-35583379	protein_coding			-4.57752	-6.07322	-3.55055	-2.62574	1.01005	5.6667	8.23917	5.9404	-5.00357	-4.67695	-4.72552	6.11047	376.462	-2.02539	-4.95405	-0.50644	0	3.12389	8.47326	11.0184	10.1432	-2.35206	-1.9487	-0.591432	-6.18443	-7.68014	-5.15747	-4.23265	-0.596868	4.05979	6.63225	4.33348	-6.61048	-6.28386	-6.33244
1.00319e-74	2.71814e-73	ENSOARG00000014701	3:107959428-107962165	protein_coding			5.46938	5.85274	5.89403	5.78443	5.66738	5.53777	5.69385	5.61053	5.50052	6.89926	9.52756	7.09886	376.362	-0.297331	-0.154169	0.120591	0	-0.339558	-0.300192	-0.0843765	-0.173067	-0.334998	1.0543	3.75396	4.07377	4.45713	4.49842	4.38882	4.27177	4.14216	4.29824	4.21491	4.10491	5.50365	8.13194
2.32667e-74	6.29479e-73	ENSOARG00000016306	3:132357083-132359341	protein_coding	HOXC8	Homeobox C8 [Source:UniProtKB/TrEMBL;Acc:B5A7E0]	2.709	-6.07322	3.67741	-6.07322	-3.15367	-1.26016	-3.31152	-6.07322	-6.07322	-6.07322	2.76678	1.72013	374.643	9.8518	-0.188055	10.9207	0	3.63286	6.74074	3.74747	0.0239512	0.0870764	-0.136244	9.90558	3.16501	-5.61721	4.13342	-5.61721	-2.69766	-0.80415	-2.85551	-5.61721	-5.61721	-5.61721	3.22279
2.52783e-74	6.82888e-73	ENSOARG00000018430	JH922639.1:21-2436	protein_coding			2.38122	3.1029	2.76356	2.86965	4.43397	2.96923	2.86502	1.93024	-0.183882	9.05128	-0.720588	5.54803	374.474	-0.706793	0.554505	-0.38801	0	1.88633	0.0963795	-0.203051	-1.06796	-3.06897	6.05519	-3.8724	1.89682	2.6185	2.27916	2.38525	3.94958	2.48484	2.38063	1.44584	-0.668278	8.56689	-1.20498
2.57402e-74	6.94339e-73	ENSOARG00000018341	14:23505870-23518073	protein_coding	MT1A	Metallothionein-1A [Source:UniProtKB/Swiss-Prot;Acc:P67982]	2.27088	0.91541	1.1172	-0.118881	-3.15367	-0.17445	0.400988	-0.18801	-0.159197	7.6322	-0.471802	4.06253	374.437	2.59922	0.955329	1.34662	0	-3.20669	-0.201749	0.49828	-0.127939	-0.113924	7.80068	0.0569917	4.51556	3.1601	3.36189	2.1258	-0.908984	2.07024	2.64567	2.05667	2.08549	9.87688	1.77288
2.61375e-74	7.04012e-73	ENSOARG00000016747	14:16109316-16189218	protein_coding	ABCC11	ATP-binding cassette, sub-family C (CFTR/MRP), member 11 [Source:HGNC Symbol;Acc:14639]	5.54026	-2.00718	-5.3689	-4.05222	2.98438	-3.90166	0.0820685	-1.55769	-4.32945	2.20396	-4.73684	2.75987	374.405	9.39724	1.28297	-1.72815	0	6.3169	1.1975	4.0877	2.25944	0.138153	5.80422	-0.530423	3.46884	-4.0786	-7.44032	-6.12364	0.912959	-5.97308	-1.98935	-3.6291	-6.40086	0.132537	-6.80826
2.63761e-74	7.09392e-73	ENSOARG00000021046	7:62148330-62194227	protein_coding	SLC28A2	solute carrier family 28 (concentrative nucleoside transporter), member 2 [Source:HGNC Symbol;Acc:11002]	-5.31763	-6.07322	-4.42427	-5.11256	6.54969	-6.07322	-2.46579	-2.17059	-6.07322	-3.14857	-4.00308	2.02222	374.387	-0.708887	-2.94408	0.372685	0	10.6787	-2.72227	2.14031	2.57867	-2.42083	1.00921	1.32799	-6.37906	-7.13465	-5.4857	-6.17399	5.48826	-7.13465	-3.52722	-3.23202	-7.13465	-4.21	-5.06451
2.69964e-74	7.25006e-73	ENSOARG00000013806	22:8375176-8448595	protein_coding			3.97007	0.581361	0.514531	-2.16995	3.7309	-2.88473	-1.98445	-2.33902	-2.12019	5.00336	-6.07322	2.40915	374.339	5.41552	1.34553	1.99026	0	4.50144	-1.88737	-0.542488	-0.662418	-0.740266	6.2419	-5.56616	2.67141	-0.717297	-0.784128	-3.46861	2.43224	-4.18338	-3.2831	-3.63768	-3.41884	3.7047	-7.37188
2.88029e-74	7.72383e-73	ENSOARG00000003797	5:56602537-56612584	protein_coding	C5orf46	chromosome 5 open reading frame 46 [Source:HGNC Symbol;Acc:33768]	4.41523	-2.00718	3.34723	-6.07322	-6.07322	-6.07322	-5.2769	-6.07322	-5.00357	-6.07322	-6.07322	2.28653	374.207	11.8331	4.68409	10.761	0	-0.338231	-0.217588	1.77815	0.0036092	2.07404	-0.0802672	0.0882514	6.32032	-0.102094	5.25232	-4.16813	-4.16813	-4.16813	-3.37181	-4.16813	-3.09848	-4.16813	-4.16813
2.9624e-74	7.93236e-73	ENSOARG00000019237	7:20656653-20664937	protein_coding	PCK2	phosphoenolpyruvate carboxykinase 2 (mitochondrial) [Source:HGNC Symbol;Acc:8725]	2.75073	4.58203	5.34107	2.901	6.71013	2.7188	2.8315	3.02896	2.23154	7.55508	-0.156182	4.84754	374.15	-0.195505	1.40139	2.39311	0	3.52983	-0.439087	-0.114898	0.230731	-0.816398	4.71594	-3.1114	1.62972	3.46102	4.22006	1.77999	5.58911	1.59778	1.71049	1.90795	1.11052	6.43407	-1.2772
3.2477e-74	8.68356e-73	ENSOARG00000017514	2:132888192-132890549	protein_coding	HOXD10	homeobox D10 [Source:HGNC Symbol;Acc:5133]	0.0475793	-3.42941	-4.66273	-3.87868	-6.07322	3.3435	-1.66233	3.06399	-6.07322	-4.54485	-5.03054	1.12626	373.962	3.39127	-0.116127	-1.3986	0	-3.63964	6.95818	1.69889	6.37075	-3.50927	-1.11042	-1.03663	0.0317963	-3.44519	-4.67851	-3.89446	-6.08901	3.32772	-1.67811	3.04821	-6.08901	-4.56063	-5.04632
4.08075e-74	1.08949e-72	ENSOARG00000014421	14:56044055-56046589	protein_coding	KLK11	kallikrein-related peptidase 11 [Source:HGNC Symbol;Acc:6359]	3.1545	-6.07322	-2.21765	-6.07322	-6.07322	-6.07322	-6.07322	-6.07322	-5.00357	-6.07322	-6.07322	0.344572	373.495	10.2555	0.341151	4.94255	0	0.341151	0.239873	-0.0456932	0.00876906	2.34121	0.0116819	-0.0554309	3.5297	-5.69803	-1.84245	-5.69803	-5.69803	-5.69803	-5.69803	-5.69803	-4.62837	-5.69803	-5.69803
5.16143e-74	1.37601e-72	ENSOARG00000016974	3:133704094-133709834	protein_coding	KRT5	Keratin 5 [Source:UniProtKB/TrEMBL;Acc:C8C9Q2]	11.3037	9.74926	11.8734	-0.534	-3.15367	-4.62635	-1.66757	-4.57355	-3.98716	-0.274069	-1.42144	9.58823	373.015	11.2442	8.59841	11.9656	0	-4.40314	-4.56314	-0.118327	-3.60158	-3.54445	-0.913084	-1.67243	10.4605	8.90608	11.0302	-1.37718	-3.99685	-5.46953	-2.51075	-5.41673	-4.83034	-1.11725	-2.26462
5.23988e-74	1.39488e-72	ENSOARG00000013020	12:71703835-71763644	protein_coding	HSD11B1	corticosteroid 11-beta-dehydrogenase isozyme 1 [Source:RefSeq peptide;Acc:NP_001009395]	3.65982	1.57418	0.440055	2.51919	2.42717	0.461223	1.09122	2.55861	-0.837071	10.1979	1.8928	6.65027	372.984	1.29455	-0.747806	-1.81255	0	0.106786	-2.21296	-1.37181	0.683706	-3.49021	7.92706	-0.692403	3.23329	1.14765	0.0135215	2.09266	2.00063	0.0346898	0.664682	2.13207	-1.2636	9.77138	1.46627
5.28879e-74	1.40585e-72	ENSOARG00000014283	3:104735638-104789477	protein_coding			0.139022	-1.05091	-0.904601	0.319644	2.40077	-0.529944	0.0869279	1.08395	6.61796	4.17034	3.42145	3.52732	372.965	-0.171998	-1.31749	-1.19559	0	2.15452	-0.916306	-0.282723	0.886925	6.25928	3.81814	3.19122	-2.66379	-3.85372	-3.70741	-2.48317	-0.402045	-3.33276	-2.71589	-1.71886	3.81514	1.36753	0.618636
6.07107e-74	1.61144e-72	ENSOARG00000004756	14:45097469-45098753	protein_coding	HAMP	Ovis aries hepcidin antimicrobial peptide (HAMP), mRNA. [Source:RefSeq mRNA;Acc:NM_001195312]	-5.33311	-6.07322	-5.36705	-2.12858	-2.2523	-3.23094	-2.08539	-2.72648	-6.07322	6.97127	-6.07322	3.26838	372.683	-4.20042	-6.87225	-4.50989	0	-2.1033	-2.67783	-0.619545	-0.588774	-6.48748	8.15851	-5.93944	-3.32733	-4.06744	-3.36127	-0.122799	-0.246522	-1.22515	-0.079604	-0.720698	-4.06744	8.97706	-4.06744
6.64033e-74	1.75998e-72	ENSOARG00000002681	AMGL01120724.1:21-7170	protein_coding			-6.07322	3.46054	-5.3689	-3.82315	-6.07322	-4.07286	-4.30282	-5.33913	-6.07322	4.8874	-6.07322	1.33377	372.5	-3.88664	6.07562	-2.16964	0	-4.45717	0.20962	-0.600892	-2.10636	-3.97482	7.84704	-3.7574	-6.44171	3.09205	-5.73739	-4.19164	-6.44171	-4.44135	-4.67131	-5.70762	-6.44171	4.51891	-6.44171
8.53652e-74	2.25927e-72	ENSOARG00000016684	10:53167649-53287211	protein_coding	SCEL	sciellin [Source:HGNC Symbol;Acc:10573]	6.53551	7.96118	2.52125	-1.28367	0.938444	-6.07322	-5.51486	-1.32128	-3.46047	0.252099	-6.07322	4.4683	371.987	8.05819	9.47999	3.72087	0	2.45169	-6.1727	-4.21974	0.665935	-3.04706	2.03298	-6.44604	5.31518	6.74085	1.30092	-2.504	-0.281886	-7.29355	-6.73519	-2.54161	-4.6808	-0.968231	-7.29355
8.76134e-74	2.31508e-72	ENSOARG00000007109	8:6787811-6798574	protein_coding	ELOVL4	ELOVL fatty acid elongase 4 [Source:HGNC Symbol;Acc:14415]	6.3088	4.47482	1.66032	-1.2294	-0.330975	-1.94356	-1.42546	-1.61066	0.507697	-1.50231	-4.72552	3.50484	371.934	6.826	4.80874	2.26954	0	-0.0101211	-1.00717	-0.770818	-1.0626	1.27676	-0.323667	-2.8214	6.45121	4.61724	1.80274	-1.08699	-0.188558	-1.80114	-1.28304	-1.46824	0.650114	-1.3599	-4.58311
8.77279e-74	2.31508e-72	ENSOARG00000006980	1:106708892-106766584	protein_coding	CD5L	CD5 molecule-like [Source:HGNC Symbol;Acc:1690]	-5.33311	-1.30509	-4.79157	-4.49749	-6.07322	-2.05688	-5.12906	-4.08347	7.67839	6.42569	-6.07322	4.58054	371.931	-2.65752	1.41776	-1.13371	0	-4.32365	0.371041	-2.62008	0.501312	10.0737	9.43252	-4.57069	-6.1787	-2.15068	-5.63716	-5.34308	-6.91881	-2.90247	-5.97465	-4.92907	6.8328	5.5801	-6.91881
8.88531e-74	2.34138e-72	ENSOARG00000006889	23:62287023-62298724	protein_coding			0.869327	2.60796	3.52552	-4.95026	-3.15367	-3.31308	-5.51486	-6.07322	-3.04737	-6.07322	-5.04577	1.11517	371.905	5.433	6.67386	7.99754	0	0.815351	0.648243	-0.858376	-2.64683	1.15992	-2.66378	0.264118	0.546245	2.28488	3.20244	-5.27334	-3.47675	-3.63616	-5.83794	-6.3963	-3.37045	-6.3963	-5.36885
1.26226e-73	3.32139e-72	ENSOARG00000012825	JH924338.1:4590-8204	protein_coding			-6.07322	-6.07322	-6.07322	-6.07322	-3.97458	-4.87186	-5.12906	-5.33913	-4.13819	-6.07322	3.71748	0.115759	371.187	-0.00948145	-0.380992	-0.0028111	0	2.53856	2.56025	1.88741	1.80338	3.64502	0.0104417	10.8367	-6.31933	-6.31933	-6.31933	-6.31933	-4.22069	-5.11797	-5.37516	-5.58524	-4.38429	-6.31933	3.47138
1.52412e-73	4.00467e-72	ENSOARG00000020270	2:222514822-222667805	protein_coding	EPHA4	EPH receptor A4 [Source:HGNC Symbol;Acc:3388]	7.14618	4.97078	5.57618	3.81026	3.19106	3.98499	3.74921	4.05273	2.89592	1.79564	2.77666	5.01797	370.802	3.35225	1.12906	1.76372	0	-0.651492	0.128101	-0.0802976	0.237759	-0.953582	-1.98318	-1.05396	5.18567	3.01027	3.61567	1.84975	1.23055	2.02448	1.7887	2.09222	0.935411	-0.164868	0.816144
1.63346e-73	4.28577e-72	ENSOARG00000020803	7:44271374-44489174	protein_coding	TLN2	talin 2 [Source:HGNC Symbol;Acc:15447]	5.32059	5.70962	4.08172	4.7569	3.59779	4.67888	5.22728	5.97312	2.93045	3.30779	8.18778	5.92936	370.66	0.567102	1.13574	-0.662135	0	-0.976776	-0.0533302	0.473209	1.30973	-1.80513	-1.3735	3.44068	2.38061	2.76964	1.14174	1.81693	0.657806	1.7389	2.2873	3.03315	-0.00952802	0.367808	5.24781
2.40418e-73	6.29889e-72	ENSOARG00000007504	22:23908269-23916771	protein_coding			2.54465	6.07592	6.73883	2.87056	3.50169	2.63858	2.59963	2.51358	2.59982	4.31061	0.877217	4.45043	369.87	-0.47621	2.878	3.73779	0	0.302986	-0.538178	-0.411618	-0.449955	-0.588209	1.37897	-2.11211	2.99474	6.526	7.18891	3.32065	3.95178	3.08866	3.04971	2.96366	3.0499	4.7607	1.3273
2.5309e-73	6.62138e-72	ENSOARG00000003388	2:138842626-138856360	protein_coding	KLHL41	kelch-like family member 41 [Source:HGNC Symbol;Acc:16905]	-0.338391	-0.480817	4.81332	1.67539	-1.48938	2.17628	-1.99046	0.318757	-0.820087	-2.42907	12.4643	9.39601	369.765	-1.91527	-1.9189	2.35905	0	-2.94282	0.41682	-2.88279	-2.21339	-2.60662	-5.41684	10.3843	-1.20312	-1.34555	3.94859	0.810655	-2.35411	1.31155	-2.85519	-0.545974	-1.68482	-3.2938	11.5996
4.60485e-73	1.203e-71	ENSOARG00000014144	16:62779408-62802815	protein_coding	CMBL		3.69822	5.00971	8.72542	4.06318	5.42859	4.56703	4.49154	4.32081	4.17392	7.91355	7.90505	6.84612	368.542	-0.528655	0.376656	4.48697	0	0.795619	0.104903	0.291457	0.129905	-0.287209	3.72223	3.67155	3.76464	5.07613	8.79184	4.12961	5.49501	4.63346	4.55796	4.38724	4.24035	7.97998	7.97148
5.74204e-73	1.49794e-71	ENSOARG00000014420	22:10172728-10197946	protein_coding	LIPN	lipase, family member N [Source:HGNC Symbol;Acc:23452]	-0.900022	-0.647009	7.66073	-4.55065	-3.97458	-5.24692	-4.33273	-6.07322	-6.07322	-2.3319	-6.07322	4.69264	368.091	4.47599	3.25964	12.122	0	-0.230144	-1.00139	-0.011095	-2.70705	-2.92291	5.27054	-2.60133	-3.45804	-3.20503	5.10271	-7.10867	-6.5326	-7.80495	-6.89076	-8.63125	-8.63125	-4.88992	-8.63125
7.65644e-73	1.9945e-71	ENSOARG00000004677	14:44873790-44881234	protein_coding	SCN1B	sodium channel, voltage-gated, type I, beta subunit [Source:HGNC Symbol;Acc:10586]	-0.40234	0.336116	-0.531719	-0.613535	-0.519775	-0.435229	-0.861697	-0.5907	-1.05623	2.51656	4.85327	1.87711	367.503	0.241537	0.837132	0.160367	0	-0.0256907	0.361867	-0.113766	0.0216602	-0.443372	3.17584	5.49952	0.0836644	0.82212	-0.0457152	-0.127531	-0.0337713	0.0507748	-0.375693	-0.104696	-0.570225	3.00256	5.33927
7.77039e-73	2.0213e-71	ENSOARG00000002845	23:45957490-46061706	protein_coding	PSTPIP2	proline-serine-threonine phosphatase interacting protein 2 [Source:HGNC Symbol;Acc:9581]	3.88563	4.58203	3.52567	3.30561	5.83941	3.05309	3.3943	4.13798	6.28589	4.32278	7.87656	5.52842	367.472	0.5289	0.935189	0.171534	0	2.19283	-0.337046	0.0429704	0.905264	2.92431	0.846415	4.53199	1.64288	2.33928	1.28291	1.06285	3.59665	0.810339	1.15154	1.89523	4.04313	2.08002	5.63381
9.35376e-73	2.42971e-71	ENSOARG00000003288	X:40781769-40812225	protein_coding	MAOB	monoamine oxidase B [Source:HGNC Symbol;Acc:6834]	1.557	1.90972	5.49419	2.51029	3.93784	2.08801	1.52876	2.99391	-0.746673	7.37016	0.471344	4.46271	367.093	-0.939741	-0.72839	2.95609	0	1.30188	-0.460536	-0.856998	0.647921	-3.40539	4.873	-2.07647	1.11764	1.47036	5.05484	2.07093	3.49848	1.64866	1.0894	2.55456	-1.18603	6.9308	0.0319872
9.76389e-73	2.53264e-71	ENSOARG00000000107	2:132912439-132915560	protein_coding	HOXD13	homeobox D13 [Source:HGNC Symbol;Acc:5136]	-6.07322	-6.07322	-6.07322	-5.38472	-6.07322	-6.07322	-4.24402	3.8613	-6.07322	-6.07322	-6.07322	1.47101	367.006	-1.59297	-1.36322	-1.61475	0	-1.36322	-1.05431	3.10377	10.1089	-0.612927	-2.18577	-1.6625	-5.88223	-5.88223	-5.88223	-5.19372	-5.88223	-5.88223	-4.05302	4.05229	-5.88223	-5.88223	-5.88223
1.08332e-72	2.80602e-71	ENSOARG00000009205	2:244907580-244918541	protein_coding	CDA	cytidine deaminase [Source:HGNC Symbol;Acc:1712]	-4.58349	1.08407	4.65221	-2.84382	-3.15367	-0.0752908	-1.39891	-1.3964	-0.542784	2.04416	-5.04577	1.98136	366.793	-1.84463	3.55644	7.34555	0	-0.774876	2.4445	1.42132	1.58341	1.83682	5.01602	-1.56017	-3.01002	2.65754	6.22568	-1.27035	-1.5802	1.49818	0.174556	0.17707	1.03068	3.61763	-3.4723
1.24174e-72	3.21179e-71	ENSOARG00000017141	2:202692205-202722105	protein_coding	STRADB	STE20-related kinase adaptor beta [Source:HGNC Symbol;Acc:13205]	2.71027	2.95117	2.54169	3.19065	4.10659	3.89841	3.77264	3.183	3.06362	5.13854	6.78751	4.51206	366.514	-0.553084	-0.41497	-0.718593	0	0.741209	0.632206	0.503811	-0.0706208	-0.191406	1.81837	3.53025	2.28803	2.52894	2.11945	2.76841	3.68435	3.47618	3.35041	2.76077	2.64139	4.71631	6.36528
1.26188e-72	3.25925e-71	ENSOARG00000005705	2:2775352-2853981	protein_coding	MEGF9	multiple EGF-like-domains 9 [Source:HGNC Symbol;Acc:3234]	6.13451	4.63732	5.44681	2.14654	2.89263	1.96143	2.75519	2.83265	2.23448	2.06958	2.21314	4.22639	366.481	4.01083	2.3773	3.30583	0	0.631607	-0.143527	0.609232	0.69214	0.110574	-0.112782	0.0519275	5.49019	3.993	4.80249	1.50222	2.24832	1.31712	2.11087	2.18833	1.59016	1.42526	1.56883
1.44239e-72	3.72021e-71	ENSOARG00000000955	14:58917858-58932185	protein_coding	CACNG6	calcium channel, voltage-dependent, gamma subunit 6 [Source:HGNC Symbol;Acc:13625]	-5.33311	-6.07322	-6.07322	-6.07322	-3.97458	-5.24692	-4.87956	-5.33913	-6.07322	-4.54485	3.88262	0.235443	366.208	1.80863	0.173565	0.0373188	0	3.09312	2.31477	3.32638	1.78239	0.322956	2.83242	11.1375	-4.9691	-5.70921	-5.70921	-5.70921	-3.61057	-4.88291	-4.51555	-4.97512	-5.70921	-4.18083	4.24663
1.99267e-72	5.13225e-71	ENSOARG00000000086	11:40776752-40777066	protein_coding	KRTAP3-1-like	LOC101112146/keratin-associated protein 3-1-like	0.32919	-6.07322	-6.07322	-6.07322	-6.07322	-6.07322	-6.07322	-6.07322	-6.07322	-6.07322	-6.07322	-1.1249	365.547	8.34139	-0.423056	-0.110589	0	-0.423056	-0.557729	0.37237	-0.131512	-0.700302	0.654207	-0.0777915	1.99577	-4.40665	-4.40665	-4.40665	-4.40665	-4.40665	-4.40665	-4.40665	-4.40665	-4.40665	-4.40665
2.2638e-72	5.82234e-71	ENSOARG00000004527	24:3973623-3997801	protein_coding	PPL	periplakin [Source:HGNC Symbol;Acc:9273]	7.97845	9.85093	7.31771	4.27428	2.73251	3.88	2.64348	4.64063	0.186578	5.66157	4.10807	6.61355	365.286	3.47242	5.60475	2.83296	0	-1.51528	-0.553219	-1.79502	0.253247	-4.17739	1.22365	-0.298969	5.64503	7.51751	4.98429	1.94086	0.399085	1.54657	0.310055	2.30721	-2.14685	3.32815	1.77464
2.79926e-72	7.18937e-71	ENSOARG00000013306	18:21557453-21608975	protein_coding	ALPK3	alpha-kinase 3 [Source:HGNC Symbol;Acc:17574]	3.24813	2.1313	4.25478	4.48672	2.64525	3.12893	3.75052	5.22838	2.60934	3.07426	9.73961	6.91843	364.852	-1.53647	-2.02733	-0.414716	0	-1.51264	-1.26996	-0.99124	0.593634	-1.79562	-1.77522	5.29697	0.867398	-0.249433	1.87405	2.10599	0.264518	0.748196	1.36979	2.84765	0.228613	0.693533	7.35888
4.50178e-72	1.15457e-70	ENSOARG00000009915	6:84886613-84922697	protein_coding	SULT1B1	sulfotransferase family, cytosolic, 1B, member 1 [Source:HGNC Symbol;Acc:17845]	-5.03705	0.145894	2.88757	1.54558	4.83732	1.54579	0.900361	0.489471	1.62495	5.85996	-6.07322	2.96139	363.881	-6.2472	-1.9004	1.20096	0	2.80037	-0.273156	-0.664203	-1.1831	-0.261315	4.16275	-8.74016	-5.09779	0.0851549	2.82683	1.48484	4.77659	1.48505	0.839622	0.428732	1.56421	5.79922	-6.13396
4.59987e-72	1.17807e-70	ENSOARG00000006677	3:80333311-80351141	protein_coding	ABCG8	ATP-binding cassette, sub-family G (WHITE), member 8 [Source:HGNC Symbol;Acc:13887]	0.321923	-0.834869	-5.13043	-2.40284	6.11075	-2.42341	-0.713646	-3.50297	-6.07322	5.32931	-4.73684	2.64619	363.837	3.07548	0.582882	-2.3178	0	7.54758	-0.312042	1.73866	-0.46453	-4.98426	7.35456	-1.78589	-0.687424	-1.84422	-6.13978	-3.41219	5.1014	-3.43276	-1.72299	-4.51231	-7.08257	4.31997	-5.74618
5.10189e-72	1.30481e-70	ENSOARG00000000706	JH922959.1:52933-58651	protein_coding	MRPL23	mitochondrial ribosomal protein L23 [Source:HGNC Symbol;Acc:10322]	2.36276	1.78471	2.47082	1.95924	1.93284	1.38155	1.5525	2.27576	1.4279	6.13226	3.62309	3.36079	363.625	0.409776	-0.257619	0.508707	0	-0.109178	-0.759614	-0.400339	0.325961	-0.715529	4.35545	1.67459	2.41117	1.83312	2.51923	2.00765	1.98126	1.42996	1.60092	2.32417	1.47632	6.18067	3.6715
5.75894e-72	1.47079e-70	ENSOARG00000008821	12:49882548-49887782	protein_coding	SLC25A34	solute carrier family 25, member 34 [Source:HGNC Symbol;Acc:27653]	2.03058	1.28208	4.76494	3.92348	5.78176	4.71967	4.88531	5.15187	1.55606	4.1866	8.70849	6.1233	363.377	-1.8156	-2.73226	0.762455	0	1.77164	0.584452	0.900606	1.26459	-2.48616	0.429963	4.71864	0.221987	-0.526515	2.95635	2.11489	3.97317	2.91108	3.07672	3.34328	-0.252531	2.37801	6.8999
8.87303e-72	2.26293e-70	ENSOARG00000018638	11:19607474-19627347	protein_coding	FOXN1	forkhead box N1 [Source:HGNC Symbol;Acc:12765]	5.12034	1.81699	-0.29067	-5.38472	-3.15367	-3.31308	-2.88369	-3.03674	-6.07322	-4.54485	-6.07322	2.802	362.493	10.6935	6.92093	5.0167	0	1.85468	1.41629	2.42082	3.41681	-2.19344	1.3193	-1.90859	4.08754	0.784183	-1.32348	-6.41752	-4.18648	-4.34588	-3.9165	-4.06955	-7.10603	-5.57765	-7.10603
1.0669e-71	2.71717e-70	ENSOARG00000018860	1:2926463-2935694	protein_coding	KLHL30	kelch-like family member 30 [Source:HGNC Symbol;Acc:24770]	-5.31763	-6.07322	-1.57815	-4.55065	-6.07322	-6.07322	-5.51486	-6.07322	-6.07322	-6.07322	3.63593	0.222552	362.116	-0.884348	-3.11777	3.00219	0	-3.11777	-3.00536	-0.837585	-2.66533	-2.87034	-2.66663	8.23775	-6.10422	-6.85982	-2.36474	-5.33725	-6.85982	-6.85982	-6.30146	-6.85982	-6.85982	-6.85982	2.84933
1.27113e-71	3.23279e-70	ENSOARG00000016371	19:9569024-9683317	protein_coding	ARPP21	cAMP-regulated phosphoprotein, 21kDa [Source:HGNC Symbol;Acc:16968]	-3.54915	-6.07322	-0.922557	-4.10065	-2.2523	-2.13275	-3.69657	-1.94874	-1.98698	-6.07322	6.44615	3.26724	361.758	-0.177231	-2.86473	2.83896	0	1.90422	0.934897	0.451071	2.13234	1.15574	-2.9656	10.3941	-4.90247	-7.42655	-2.27588	-5.45398	-3.60563	-3.48608	-5.04989	-3.30206	-3.3403	-7.42655	5.09283
1.45839e-71	3.70387e-70	ENSOARG00000019952	1:12513522-12516901	protein_coding	FHL3	four and a half LIM domains 3 [Source:HGNC Symbol;Acc:3704]	1.93399	1.18647	2.76215	2.10967	1.73573	2.14197	1.18481	2.21208	2.22599	1.98307	7.2617	4.47036	361.477	-0.242833	-0.851429	0.598458	0	-0.300675	0.101948	-0.823968	0.0762158	0.186216	0.0382812	5.28965	1.38014	0.632617	2.2083	1.55582	1.18188	1.58812	0.630953	1.65822	1.67213	1.42922	6.70785
1.52963e-71	3.87938e-70	ENSOARG00000006745	3:80351499-80384030	protein_coding	ABCG5	ATP-binding cassette, sub-family G (WHITE), member 5 [Source:HGNC Symbol;Acc:13886]	-1.54998	-6.07322	-6.07322	-5.38472	5.30057	-6.07322	-5.51486	-5.31358	-6.07322	3.15987	-6.07322	1.28874	361.38	4.34325	-2.05461	-1.69795	0	10.3189	-1.79498	-0.182928	0.16599	-1.43183	8.13729	-1.61685	-2.51345	-7.0367	-7.0367	-6.34819	4.3371	-7.0367	-6.47833	-6.27706	-7.0367	2.1964	-7.0367
2.42517e-71	6.14209e-70	ENSOARG00000001717	14:25868550-25890497	protein_coding	GOT2	glutamic-oxaloacetic transaminase 2, mitochondrial [Source:HGNC Symbol;Acc:4433]	6.03641	6.37051	7.35474	6.24008	6.46383	6.15513	5.90135	5.79834	5.47226	8.08467	10.0719	7.74907	360.437	-0.189258	-0.142263	1.1332	0	-0.0489303	-0.243755	-0.330222	-0.439334	-0.925806	1.86729	3.85059	4.94827	5.28237	6.2666	5.15194	5.37569	5.06698	4.81321	4.7102	4.38412	6.99653	8.98373
4.40399e-71	1.11382e-69	ENSOARG00000016914	3:133608720-133618332	protein_coding	KRT73	keratin 73 [Source:HGNC Symbol;Acc:28928]	5.32086	-0.331807	0.524371	-6.07322	-6.07322	-5.24692	-5.2769	-4.57949	-6.07322	-6.07322	-5.04577	3.47627	359.217	13.3753	6.67658	7.71253	0	-0.0512853	1.92785	1.84217	2.53661	-0.20379	0.162211	2.82108	4.68766	-0.965006	-0.108828	-6.70642	-6.70642	-5.88012	-5.9101	-5.21269	-6.70642	-6.70642	-5.67897
4.79117e-71	1.21007e-69	ENSOARG00000000432	1:102311556-102312291	protein_coding	S100A12	S100 calcium binding protein A12 [Source:HGNC Symbol;Acc:10489]	0.744815	10.3666	10.5322	-0.94366	-1.70178	-3.31308	-1.6698	-2.23755	3.60129	1.95246	-3.69807	7.84627	359.045	3.10066	9.39446	11.2264	0	-2.70919	-3.62091	-0.918324	-1.60741	3.8541	2.08806	-2.05775	2.58648	12.2083	12.3739	0.898003	0.139884	-1.47141	0.171865	-0.395887	5.44295	3.79413	-1.85641
4.82271e-71	1.21635e-69	ENSOARG00000008539	23:34979403-35099472	protein_coding	GREB1L	growth regulation by estrogen in breast cancer-like [Source:HGNC Symbol;Acc:31042]	2.69809	3.83624	-1.42794	2.28151	-0.519775	1.236	0.09346	0.0936831	-1.75479	4.53675	7.43198	4.55159	359.031	0.0797017	0.995324	-3.62065	0	-3.37539	-1.6303	-2.53753	-2.12421	-4.61208	1.98258	4.76814	0.151138	1.28929	-3.97489	-0.265447	-3.06673	-1.31095	-2.4535	-2.45327	-4.30174	1.9898	4.88502
5.20056e-71	1.30984e-69	ENSOARG00000008951	14:51072917-51077252	protein_coding	LYPD5	LY6/PLAUR domain containing 5 [Source:HGNC Symbol;Acc:26397]	3.91376	1.28208	2.70058	-6.07322	-3.97458	-3.9822	-4.46709	-5.31358	-4.94983	-4.67695	-6.07322	1.66339	358.877	11.12	8.50201	9.95176	0	3.07068	4.74191	2.90877	1.8246	2.38036	2.80728	-0.00212936	3.21066	0.578976	1.99748	-6.77632	-4.67768	-4.6853	-5.17019	-6.01669	-5.65293	-5.38005	-6.77632
6.72665e-71	1.69187e-69	ENSOARG00000009265	8:21215915-21221243	protein_coding	FAM26D	family with sequence similarity 26, member D [Source:HGNC Symbol;Acc:21094]	1.45752	-6.07322	-6.07322	-6.07322	-6.07322	-6.07322	-6.07322	-6.07322	-6.07322	-6.07322	-6.07322	0.625568	358.351	10.3168	-0.831561	-0.0668688	0	-0.831561	-0.782431	0.389194	-0.111199	-0.725714	0.345964	0.0738695	1.53913	-5.99161	-5.99161	-5.99161	-5.99161	-5.99161	-5.99161	-5.99161	-5.99161	-5.99161	-5.99161
9.31986e-71	2.34088e-69	ENSOARG00000012206	14:12842741-12871377	protein_coding	CA5A	carbonic anhydrase VA, mitochondrial [Source:HGNC Symbol;Acc:1377]	-3.54802	-6.07322	-4.6961	-6.07322	-3.97458	-3.23094	-6.07322	-6.07322	-3.88017	4.18809	-6.07322	0.322359	357.684	3.38683	0.442953	2.33807	0	3.36251	3.63872	0.068358	-0.0495675	2.8701	11.6159	-0.1488	-4.47326	-6.99846	-5.62134	-6.99846	-4.89982	-4.15618	-6.99846	-6.99846	-4.80541	3.26285	-6.99846
1.14001e-70	2.85943e-69	ENSOARG00000007076	2:14236718-14281776	protein_coding	CTNNAL1	catenin (cadherin-associated protein), alpha-like 1 [Source:HGNC Symbol;Acc:2512]	5.15501	4.44931	2.74239	3.92872	2.50358	3.26434	3.24291	3.80293	3.90185	4.84145	7.7556	5.30319	357.272	1.14966	0.776906	-1.22635	0	-1.17022	-0.502813	-0.78487	-0.214134	0.135443	0.77378	3.76149	4.11587	3.41017	1.70325	2.88958	1.46444	2.2252	2.20377	2.7638	2.86271	3.80231	6.71646
1.20674e-70	3.02266e-69	ENSOARG00000010643	5:65726713-65755586	protein_coding	TIMD4	T-cell immunoglobulin and mucin domain containing 4 [Source:HGNC Symbol;Acc:25132]	-0.947113	1.08407	0.145902	1.80345	2.20107	2.51132	3.29937	2.85289	6.95897	5.04711	-0.0933304	4.02941	357.155	-1.95634	-0.368555	-1.71305	0	0.751177	0.720199	1.46125	1.00876	5.15441	3.43641	-1.68807	-1.15501	0.876179	-0.0619905	1.59556	1.99318	2.30343	3.09148	2.645	6.75108	4.83921	-0.301223
1.38304e-70	3.45949e-69	ENSOARG00000016331	3:132378989-132383129	protein_coding	HOXC10	homeobox C10 [Source:HGNC Symbol;Acc:5122]	-0.736494	-6.07322	-6.07322	-6.07322	-6.07322	-2.05688	-6.07322	-6.07322	-6.07322	-6.07322	3.34969	0.025465	356.876	6.60318	0.355195	0.0407432	0	0.355195	5.38217	-0.129693	0.0530162	0.437359	-0.176909	10.5937	-0.756551	-6.09328	-6.09328	-6.09328	-6.09328	-2.07693	-6.09328	-6.09328	-6.09328	-6.09328	3.32963
1.70608e-70	4.2617e-69	ENSOARG00000010474	2:43221081-43236470	protein_coding	HR	hair growth associated [Source:HGNC Symbol;Acc:5172]	7.71974	5.14937	6.21741	3.10453	2.67859	3.9269	3.87036	3.3971	-0.351829	-0.572642	3.27761	5.44347	356.447	4.34029	1.55395	2.82458	0	-0.918202	0.292873	0.484695	0.23754	-3.99989	-3.81122	-0.093438	5.74632	3.17594	4.24398	1.1311	0.705164	1.95347	1.89694	1.42368	-2.32526	-2.54607	1.30418
1.98781e-70	4.95866e-69	ENSOARG00000017081	3:133820569-133827920	protein_coding	KRT84	keratin 84 [Source:HGNC Symbol;Acc:6461]	4.37684	-3.42941	-0.691731	-3.5841	-3.15367	-2.42753	-2.75678	-3.58286	-6.07322	-4.23098	-6.07322	2.06818	356.134	7.85731	-0.482919	2.47049	0	-0.185515	0.270882	0.351718	0.405298	-4.30401	0.318079	-4.00531	3.54334	-4.26291	-1.52523	-4.4176	-3.98717	-3.26102	-3.59028	-4.41636	-6.90672	-5.06448	-6.90672
2.02999e-70	5.05696e-69	ENSOARG00000009090	3:85950947-85956168	protein_coding	CYP1B1	cytochrome P450, family 1, subfamily B, polypeptide 1 [Source:HGNC Symbol;Acc:2597]	4.56037	-0.331807	5.52567	2.32697	1.43115	-0.0759246	2.50686	0.700141	7.10161	-0.481131	0.993929	4.41275	356.091	2.2258	-2.32464	3.20744	0	-0.552123	-2.22645	0.25694	-1.52462	4.99113	-1.5549	-1.20348	3.6996	-1.19257	4.6649	1.4662	0.570381	-0.936689	1.64609	-0.160623	6.24084	-1.3419	0.133165
2.52218e-70	6.27447e-69	ENSOARG00000012597	12:36976494-37004901	protein_coding	FMO1	flavin containing monooxygenase 1 [Source:HGNC Symbol;Acc:3769]	-2.6857	1.87947	-6.07322	-4.19778	-6.07322	-4.62635	-5.2769	-3.83498	-3.46047	10.516	2.00702	7.18401	355.647	1.0413	5.1358	-3.4291	0	-3.81397	-0.523269	-1.54901	2.46786	-0.207812	14.4838	6.38005	-3.36828	1.19689	-6.7558	-4.88035	-6.7558	-5.30892	-5.95947	-4.51756	-4.14304	9.83347	1.32445
2.54931e-70	6.33332e-69	ENSOARG00000015108	11:40517710-40527797	protein_coding	KRT25	keratin 25 [Source:HGNC Symbol;Acc:30839]	10.1783	-2.00718	-5.09463	-4.10065	-6.07322	-4.51444	-3.67392	-3.84539	-5.00357	-4.54485	-4.09821	8.53691	355.625	15.2543	2.02406	-1.24006	0	-2.99826	-0.979051	0.370959	0.106004	-1.17043	-0.253127	1.92012	8.14588	-4.03964	-7.12709	-6.13311	-8.10568	-6.54689	-5.70637	-5.87784	-7.03602	-6.5773	-6.13066
2.63212e-70	6.53016e-69	ENSOARG00000016021	X:18926660-18928108	protein_coding	KLHL34	kelch-like family member 34 [Source:HGNC Symbol;Acc:26634]	-6.07322	-6.07322	-6.07322	-4.65081	-3.97458	-6.07322	-6.07322	-6.07322	-6.07322	-6.07322	3.23333	-0.134387	355.56	-2.69352	-2.78066	-2.67815	0	0.138896	-2.89476	-2.45199	-2.68707	-3.01129	-2.29701	7.76876	-6.48356	-6.48356	-6.48356	-5.06115	-4.38492	-6.48356	-6.48356	-6.48356	-6.48356	-6.48356	2.82299
2.65767e-70	6.5846e-69	ENSOARG00000005135	24:6445492-6556867	protein_coding	RBFOX1	RNA binding protein, fox-1 homolog (C. elegans) 1 [Source:HGNC Symbol;Acc:18222]	-3.53862	-3.42941	-2.95668	-1.93974	-2.63371	-2.85588	-4.99181	-2.99295	-0.542784	-1.77074	3.96375	0.562017	355.54	-0.935172	-1.74695	-0.930513	0	-0.899016	-1.38587	-2.57611	-1.08888	1.1134	0.311938	5.85425	-2.95222	-2.843	-2.37027	-1.35333	-2.0473	-2.26947	-4.40541	-2.40654	0.0436217	-1.18433	4.55015
3.03648e-70	7.51292e-69	ENSOARG00000009210	9:57521917-57524900	protein_coding	FABP9	fatty acid binding protein 9, testis [Source:HGNC Symbol;Acc:3563]	5.94684	-6.07322	-6.07322	-6.07322	-6.07322	-6.07322	-5.12906	-5.31358	-6.07322	-6.07322	-4.7417	4.53825	355.267	14.1866	-0.1767	-0.0849485	0	-0.1767	-0.374975	1.93906	1.59889	-0.555772	0.527615	4.12831	7.25085	-4.76922	-4.76922	-4.76922	-4.76922	-4.76922	-3.82505	-4.00958	-4.76922	-4.76922	-3.43769
3.23403e-70	7.99085e-69	ENSOARG00000016590	15:30206946-30231870	protein_coding	TRIM29	tripartite motif containing 29 [Source:HGNC Symbol;Acc:17274]	8.01047	7.64951	7.63872	-4.93982	-6.07322	-4.62635	1.65574	0.653264	-6.07322	-6.07322	-6.07322	5.98112	355.139	12.5588	11.6333	12.1553	0	-3.08942	0.467007	6.06699	7.32716	-2.57162	-3.23441	-2.8263	7.22387	6.86291	6.85213	-5.72642	-6.85982	-5.41294	0.869146	-0.133332	-6.85982	-6.85982	-6.85982
5.11316e-70	1.26168e-68	ENSOARG00000017063	3:133799936-133812021	protein_coding	KRT2.10	Keratin 82 [Source:UniProtKB/TrEMBL;Acc:E3VW84]	4.42857	-6.07322	-5.3689	-6.07322	-6.07322	-5.24692	-6.07322	-6.07322	-6.07322	-6.07322	-3.51418	2.95451	354.201	12.56	-0.211339	1.51679	0	-0.211339	1.69181	0.227931	-0.0907472	-0.513876	0.452753	4.93891	3.80096	-6.70083	-5.9965	-6.70083	-6.70083	-5.87453	-6.70083	-6.70083	-6.70083	-6.70083	-4.14179
5.1486e-70	1.26871e-68	ENSOARG00000008001	2:243071846-243078666	protein_coding	C1QA	complement component 1, q subcomponent, A chain [Source:HGNC Symbol;Acc:1241]	2.51374	4.0208	3.90585	6.0702	6.73279	6.33165	7.22036	6.69634	9.94857	7.07092	3.39536	7.13215	354.187	-3.34376	-1.96524	-2.17696	0	0.747313	0.184206	1.19704	0.619585	3.79641	1.1078	-2.69582	0.21772	1.72479	1.60983	3.77419	4.43678	4.03563	4.92435	4.40033	7.65255	4.77491	1.09934
5.21131e-70	1.28243e-68	ENSOARG00000015546	5:46741353-46780919	protein_coding	PKD2L2	polycystic kidney disease 2-like 2 [Source:HGNC Symbol;Acc:9012]	-4.57752	-6.07322	-6.07322	-5.23916	-6.07322	-6.07322	-6.07322	-5.06111	-6.07322	-6.07322	3.71109	0.0768737	354.162	0.691502	-2.21075	-1.86079	0	-2.21075	-2.03581	-1.93075	0.674301	-1.81707	-2.08602	9.0369	-5.53729	-7.03299	-7.03299	-6.19893	-7.03299	-7.03299	-7.03299	-6.02088	-7.03299	-7.03299	2.75132
7.22093e-70	1.77458e-68	ENSOARG00000015326	24:35554263-35565612	protein_coding	MUC12	mucin 12, cell surface associated [Source:HGNC Symbol;Acc:7510]	-6.07322	-6.07322	-4.69425	-2.45989	1.32283	5.90249	8.10699	5.7697	-6.07322	-6.07322	-6.07322	6.03319	353.495	-5.09055	-5.38313	-2.732	0	3.00864	8.04284	10.2252	9.66257	-5.04525	-5.28994	-5.0354	-7.97278	-7.97278	-6.59382	-4.35945	-0.576728	4.00293	6.20743	3.87014	-7.97278	-7.97278	-7.97278
7.96276e-70	1.95425e-68	ENSOARG00000007977	2:243051704-243053674	protein_coding	C1QB	complement component 1, q subcomponent, B chain [Source:HGNC Symbol;Acc:1242]	2.02976	3.66946	3.53554	5.79669	6.63709	6.13332	6.81631	6.45299	9.23802	6.84913	3.32427	6.62828	353.295	-3.59961	-1.98906	-2.28117	0	0.979313	0.357993	1.04622	0.656428	3.43811	1.11322	-2.4796	2.44479	4.08449	3.95058	6.21173	7.05213	6.54835	7.23134	6.86803	9.65306	7.26417	3.73931
1.0549e-69	2.5855e-68	ENSOARG00000015942	15:29405834-29421267	protein_coding	USP2	ubiquitin specific peptidase 2 [Source:HGNC Symbol;Acc:12618]	3.59344	1.75168	3.58981	-0.116139	0.0549106	0.576306	1.38392	0.487378	-3.46047	-0.859752	6.54956	3.85404	352.72	3.01461	1.11468	2.99698	0	-0.589262	-0.155733	0.758905	-0.154909	-4.29434	-1.40449	5.91684	2.69659	0.854831	2.69296	-1.01299	-0.841942	-0.320547	0.487062	-0.409475	-4.35732	-1.7566	5.65271
1.49952e-69	3.67031e-68	ENSOARG00000019658	2:140432670-140433650	protein_coding	B3GALT1	UDP-Gal:betaGlcNAc beta 1,3-galactosyltransferase, polypeptide 1 [Source:HGNC Symbol;Acc:916]	-6.07322	-6.07322	-6.07322	-3.81675	-6.07322	-6.07322	-5.51486	-6.07322	-2.86376	5.05743	-3.7075	1.29726	352	-3.18035	-4.16062	-3.17255	0	-4.16062	-3.86666	-1.39226	-3.22048	1.04014	8.74505	2.67548	-6.04555	-6.04555	-6.04555	-3.78907	-6.04555	-6.04555	-5.48719	-6.04555	-2.83609	5.08511	-3.67983
1.80686e-69	4.41662e-68	ENSOARG00000001592	AMGL01121099.1:21-16581	protein_coding			-0.423735	-1.61384	0.704934	-1.58476	-1.70178	-3.7634	-1.87217	-1.06796	-4.26653	6.91557	1.05045	3.28389	351.618	0.732891	-0.233035	2.10556	0	-0.323083	-0.761351	-0.60003	0.194212	-2.35683	8.14521	2.20302	-2.14226	-3.33237	-1.01359	-3.30328	-3.4203	-5.48193	-3.5907	-2.78648	-5.98505	5.19704	-0.668077
1.92144e-69	4.69041e-68	ENSOARG00000009290	5:17173113-17175510	protein_coding	LRG1	leucine-rich alpha-2-glycoprotein 1 [Source:HGNC Symbol;Acc:29480]	-3.67753	-1.30509	-6.07322	0.180202	3.14409	-6.07322	-4.68455	-3.41244	-0.53149	7.6656	-6.07322	3.99053	351.493	-3.15792	-2.3167	-7.68841	0	2.15799	-7.89852	-4.29641	-3.17445	-0.848895	6.87261	-7.61178	-3.76431	-1.39187	-6.16001	0.0934181	3.05731	-6.16001	-4.77133	-3.49923	-0.618273	7.57882	-6.16001
2.97409e-69	7.25034e-68	ENSOARG00000008245	19:52813994-52841820	protein_coding	LRRC2	leucine rich repeat containing 2 [Source:HGNC Symbol;Acc:14676]	0.166261	3.90544	-1.90011	1.59133	2.37388	2.45669	2.94904	2.00814	1.48531	0.119933	9.74117	6.67595	350.599	-2.86536	0.291003	-5.12972	0	-1.24191	-0.91064	-0.239757	-0.877949	-1.90404	-3.10561	6.54478	-1.49503	2.24414	-3.56141	-0.0699655	0.712585	0.795394	1.28774	0.346851	-0.175988	-1.54136	8.07988
3.32521e-69	8.09548e-68	ENSOARG00000005586	13:27001214-27017738	protein_coding	PHYH	phytanoyl-CoA 2-hydroxylase [Source:HGNC Symbol;Acc:8940]	5.03009	4.348	5.52701	4.99748	7.34022	5.05451	5.56992	5.38048	3.82029	10.0856	7.20455	7.18261	350.37	0.140733	-1.18873	0.499171	0	1.80395	-0.240005	0.533686	0.355564	-1.48489	5.07182	2.16379	4.77187	4.08978	5.26879	4.73927	7.082	4.79629	5.31171	5.12226	3.56207	9.82738	6.94633
3.5406e-69	8.60837e-68	ENSOARG00000007914	9:23766983-23782634	protein_coding	GSDMC	gasdermin C [Source:HGNC Symbol;Acc:7151]	1.73989	1.75168	3.46058	-6.07322	-6.07322	-6.07322	-4.71854	-6.07322	-6.07322	-6.07322	-6.07322	1.12564	350.242	9.00684	8.69842	10.7032	0	-0.123302	-0.0172253	2.46299	0.0243997	0.110258	-0.127771	0.0611035	1.14343	1.15523	2.86413	-6.66968	-6.66968	-6.66968	-5.31499	-6.66968	-6.66968	-6.66968	-6.66968
4.4225e-69	1.07382e-67	ENSOARG00000017402	3:28671825-28710732	protein_coding	APOB	apolipoprotein B [Source:HGNC Symbol;Acc:603]	-2.64565	3.91292	-3.74821	1.95349	11.2134	0.796278	-0.6613	-1.60931	-1.94927	13.6649	-6.07322	10.1201	349.787	-6.46758	-1.24182	-7.23795	0	6.05937	-3.36035	-4.30623	-5.37061	-6.23446	9.76274	-10.9094	-6.41838	0.140192	-7.52094	-1.81924	7.44067	-2.97645	-4.43403	-5.38204	-5.722	9.8922	-9.84595
6.55732e-69	1.59006e-67	ENSOARG00000004928	23:54198163-54207208	protein_coding			0.593791	7.0849	-0.477315	-0.812628	-3.97458	-1.42287	-1.41076	2.04254	-1.98698	-4.54485	-0.944618	2.6607	348.981	1.37101	8.62358	0.270729	0	-2.61491	-0.356459	-0.00218314	2.89717	-0.926304	-3.55298	-0.0804065	-1.67554	4.81557	-2.74665	-3.08196	-6.24391	-3.6922	-3.6801	-0.226788	-4.25631	-6.81418	-3.21395
6.64339e-69	1.60879e-67	ENSOARG00000016105	2:116948259-116959680	protein_coding	PROC	protein C (inactivator of coagulation factors Va and VIIIa) [Source:HGNC Symbol;Acc:9451]	1.71436	-1.30509	-5.3689	-2.21289	0.655485	-0.0404922	-0.326421	-1.50864	0.569963	8.46134	-5.04577	4.81733	348.954	2.50427	-1.56431	-4.8495	0	0.416164	0.700256	0.746543	-0.564569	1.34289	8.516	-3.712	0.234612	-2.78484	-6.84865	-3.69264	-0.824263	-1.52024	-1.80617	-2.98839	-0.909785	6.98159	-6.52552
6.96466e-69	1.68436e-67	ENSOARG00000014729	11:26871536-26873310	protein_coding	CD68	CD68 molecule [Source:HGNC Symbol;Acc:1693]	3.04584	3.11593	2.66901	3.93824	3.83315	5.11955	4.98799	5.03621	7.59688	6.41982	2.13551	5.25698	348.857	-0.883971	-0.540506	-1.25116	0	0.177193	1.23609	1.05972	1.09579	3.71509	2.74264	-1.75026	3.01727	3.08736	2.64044	3.90967	3.80458	5.09098	4.95942	5.00764	7.56832	6.39125	2.10694
7.58331e-69	1.83154e-67	ENSOARG00000003044	25:773585-776063	protein_coding	ACTA1	actin, alpha 1, skeletal muscle [Source:HGNC Symbol;Acc:129]	5.69244	5.98116	6.96778	7.15195	6.54668	6.58661	6.56859	6.68122	6.44843	5.88202	14.0548	11.3682	348.683	-1.58094	-1.22305	-0.226403	0	-0.657475	-0.603864	-0.717105	-0.434531	-0.743989	-1.45204	7.21623	5.37861	5.66733	6.65396	6.83813	6.23286	6.27279	6.25476	6.36739	6.13461	5.56819	13.741
8.8754e-69	2.14078e-67	ENSOARG00000013621	2:191572516-191575538	protein_coding	GYPC	glycophorin C (Gerbich blood group) [Source:HGNC Symbol;Acc:4704]	1.42309	0.724387	0.0118021	1.36751	1.96923	1.34252	1.45464	1.79183	2.75159	2.72349	6.36426	3.58717	348.361	-0.0236255	-0.571589	-1.19548	0	0.677013	0.0432963	0.0354666	0.482002	1.46423	1.18404	4.92046	3.06245	2.36374	1.65116	3.00687	3.60858	2.98188	3.094	3.43119	4.39095	4.36285	8.00362
9.831e-69	2.36814e-67	ENSOARG00000021080	1:100945966-100951517	protein_coding	TCHHL2	overlap with TCHHL2	-0.420778	4.65081	15.3898	4.84123	-3.15367	-1.74741	1.11837	-1.79516	-4.53012	-6.07322	-0.910348	12.3621	348.152	-5.28677	-0.290944	10.5081	0	-8.19363	-6.72794	-1.01906	-5.2139	-9.0866	-11.888	-5.76031	-2.30674	2.76485	13.5038	2.95526	-5.03963	-3.63338	-0.767596	-3.68112	-6.41609	-7.95919	-2.79631
1.33274e-68	3.20614e-67	ENSOARG00000012190	1:262656552-262668911	protein_coding			1.06848	-6.07322	-6.07322	-6.07322	-6.07322	-6.07322	-6.07322	-6.07322	-6.07322	-6.07322	-6.07322	-0.909035	347.529	8.64052	-0.538212	-0.0821497	0	-0.538212	-0.585995	0.326235	-0.108513	-0.639136	0.450583	-0.0124556	1.47202	-5.66968	-5.66968	-5.66968	-5.66968	-5.66968	-5.66968	-5.66968	-5.66968	-5.66968	-5.66968
1.93911e-68	4.65871e-67	ENSOARG00000016363	3:132422835-132429375	protein_coding	HOXC13	Hoxc13 [Source:UniProtKB/TrEMBL;Acc:Q864B9]	4.10546	-6.07322	-4.25424	-6.07322	-6.07322	-5.24692	-6.07322	-6.07322	-6.07322	-4.67695	-6.07322	1.80277	346.761	11.5955	0.262588	3.28952	0	0.262588	2.06309	0.0983347	-0.056365	-0.256431	3.25642	-0.130754	4.27197	-5.90672	-4.08774	-5.90672	-5.90672	-5.08042	-5.90672	-5.90672	-5.90672	-4.51045	-5.90672
2.33546e-68	5.60356e-67	ENSOARG00000000912	25:41522440-41537926	protein_coding	ANXA8L/LOC101114082		6.54422	6.38404	8.86168	3.62533	-1.30427	2.80914	2.72963	3.31383	-0.101927	-2.4345	1.56765	6.23526	346.381	2.71178	2.4678	5.07744	0	-5.24709	-1.03161	-1.07618	-0.21759	-3.74846	-3.57016	-2.22064	6.52843	6.36826	8.84589	3.60954	-1.32006	2.79336	2.71384	3.29804	-0.11771	-2.45029	1.55187
2.67791e-68	6.41678e-67	ENSOARG00000008650	2:31653188-31684127	protein_coding	FBP	Fructose-1,6-bisphosphatase [Source:UniProtKB/TrEMBL;Acc:E9P1J3]	3.619	3.89791	4.0735	3.86962	5.86256	3.64395	4.03016	4.13481	2.68486	9.31865	1.12328	6.00082	346.101	-0.313903	-0.317581	0.121671	0	1.64761	-0.553076	0.102623	0.228539	-1.57599	5.47665	-2.61294	3.59469	3.87359	4.04918	3.8453	5.83824	3.61963	4.00584	4.11049	2.66054	9.29433	1.09896
2.9017e-68	6.94389e-67	ENSOARG00000007666	26:14223802-14227499	protein_coding	SLC25A4	Ovis aries solute carrier family 25 (mitochondrial carrier; adenine nucleotide translocator), member 4 (SLC25A4), nuclear gene encoding mitochondrial protein, mRNA. [Source:RefSeq mRNA;Acc:NM_001127278]	4.13916	5.62097	6.05102	6.70069	4.96893	5.11669	4.57948	4.98597	4.05914	7.00447	10.5181	7.86131	345.936	-2.72724	-1.45841	-0.624462	0	-2.11058	-1.70972	-2.26905	-1.85889	-2.75918	0.046292	3.79343	4.29116	5.77298	6.20302	6.85269	5.12093	5.26869	4.73148	5.13797	4.21114	7.15648	10.6701
2.93977e-68	7.02578e-67	ENSOARG00000020752	3:58685544-58691134	protein_coding	FABP1	fatty acid binding protein 1, liver [Source:HGNC Symbol;Acc:3555]	-5.31763	-2.00718	-3.9761	-5.23916	11.2005	6.2212	7.10949	5.13326	-3.88017	8.97245	-6.07322	7.43983	345.91	-0.211327	2.46335	1.50552	0	15.7148	11.4648	12.5335	12.034	1.14688	13.8755	-1.80929	-3.93681	-0.626361	-2.59528	-3.85833	12.5814	7.60202	8.49031	6.51408	-2.49935	10.3533	-4.6924
4.4228e-68	1.05563e-66	ENSOARG00000000611	25:40917748-40978158	protein_coding	LDB3	LIM domain binding 3 [Source:HGNC Symbol;Acc:15710]	2.16483	0.336116	4.07816	4.37121	1.95115	3.18929	2.52789	2.79714	1.92473	-0.224853	11.7249	8.66512	345.073	-2.87524	-4.59921	-0.476323	0	-2.97843	-1.48339	-2.52404	-1.93757	-2.7074	-4.51216	6.83206	0.0514638	-1.77725	1.96479	2.25785	-0.162217	1.07592	0.414523	0.683777	-0.188638	-2.33822	9.61154
4.65549e-68	1.10971e-66	ENSOARG00000012512	11:55837716-55848306	protein_coding			-2.53325	-6.07322	-5.09255	-1.94425	-1.30427	-2.00416	-1.07002	-0.913885	5.89052	2.7624	-3.38914	2.49808	344.968	-0.318494	-5.28967	-2.85772	0	0.452579	-0.485964	0.979724	1.25718	7.52912	4.78499	-1.03951	-4.4386	-7.97857	-6.9979	-3.8496	-3.20962	-3.90951	-2.97537	-2.81924	3.98517	0.857046	-5.29449
4.95533e-68	1.17964e-66	ENSOARG00000014550	X:16816665-16836838	protein_coding			4.43406	4.77925	5.98949	5.29541	5.075	5.27212	5.16812	4.99085	4.36391	5.02008	8.43379	6.18446	344.841	-0.863843	-0.628864	0.688067	0	-0.333051	-0.0730019	-0.114139	-0.308496	-0.98517	-0.29062	3.17671	4.20386	4.54905	5.75928	5.0652	4.84479	5.04192	4.93792	4.76065	4.13371	4.78988	8.20358
5.11007e-68	1.21489e-66	ENSOARG00000023593	23:34763966-34764076	miRNA			-5.03705	-6.07322	-1.47407	-1.56546	-3.97458	-2.13275	-3.7265	-2.67194	-3.01479	-4.54485	5.47643	2.31156	344.778	-3.30363	-5.58044	-0.183626	0	-2.66089	-0.423983	-1.7207	-0.42751	-1.26038	-3.25725	6.79265	-1.86568	-2.90185	1.6973	1.60591	-0.803213	1.03861	-0.555136	0.499425	0.156579	-1.37348	8.64779
5.85349e-68	1.38982e-66	ENSOARG00000005566	11:36195487-36198981	protein_coding	DLX3	distal-less homeobox 3 [Source:HGNC Symbol;Acc:2916]	4.01534	-1.61384	-1.73313	-6.07322	-6.07322	-6.07322	-5.12906	-4.29845	-6.07322	-6.07322	-6.07322	1.66471	344.5	11.3624	5.07002	5.96528	0	-0.356197	-0.456598	1.98828	3.04514	-0.558968	0.435254	-0.0557998	4.23125	-1.39793	-1.51722	-5.85731	-5.85731	-5.85731	-4.91314	-4.08253	-5.85731	-5.85731	-5.85731
5.89879e-68	1.39876e-66	ENSOARG00000005172	13:64391117-64391305	protein_coding			4.5632	4.77104	5.94842	4.95373	4.83239	4.6345	5.10259	5.00709	4.62398	5.51117	8.28629	6.05252	344.484	-0.399471	-0.288044	0.989096	0	-0.226671	-0.354363	0.157734	0.052629	-0.380877	0.539109	3.32387	6.96674	7.17458	8.35196	7.35727	7.23594	7.03804	7.50613	7.41063	7.02752	7.91471	10.6898
6.50279e-68	1.53998e-66	ENSOARG00000002173	6:97495356-97504161	protein_coding	PLAC8	placenta-specific 8 [Source:HGNC Symbol;Acc:19254]	-5.05436	-2.00718	-2.73878	0.333524	5.12019	2.2777	3.08212	0.942188	6.68176	3.94402	-2.78636	3.6812	344.284	-5.12569	-2.94396	-3.31851	0	4.22683	1.62306	2.49599	0.355831	5.73224	3.4807	-2.18196	-3.5924	-0.545224	-1.27682	1.79548	6.58215	3.73966	4.54408	2.40415	8.14372	5.40598	-1.3244
7.98093e-68	1.88758e-66	ENSOARG00000009510	16:35014734-35075088	protein_coding	C9	complement component 9 [Source:HGNC Symbol;Acc:1358]	-6.07322	4.46976	-6.07322	-4.75824	1.73573	5.46056	4.53613	1.87586	-6.07322	11.0936	-6.07322	7.47683	343.865	-3.3184	7.90495	-3.32387	0	5.16819	9.6208	8.52855	7.63735	-3.17374	14.5531	-3.26238	-6.80441	3.73857	-6.80441	-5.48942	1.00455	4.72938	3.80495	1.14468	-6.80441	10.3624	-6.80441
7.99496e-68	1.88845e-66	ENSOARG00000020432	7:34254112-34262949	protein_coding			6.4662	3.77182	4.58411	2.89403	2.42717	2.67401	2.22113	2.92066	2.03608	2.2159	2.31705	4.22238	343.861	3.62147	0.762283	1.68192	0	-0.583581	-0.209161	-0.709943	-0.00989381	-0.852147	-0.797626	-0.551063	5.15644	2.46206	3.27435	1.58427	1.11741	1.36425	0.911375	1.6109	0.72632	0.906144	1.0073
9.56435e-68	2.25622e-66	ENSOARG00000001909	1:182745303-182745410	protein_coding			3.51093	3.32119	4.66937	3.82724	3.80323	3.34612	3.88296	3.83918	3.5961	4.07821	6.98075	4.76999	343.494	-0.325941	-0.583979	0.842025	0	-0.101637	-0.525291	0.05862	0.00190347	-0.272163	0.240091	3.14517	6.72183	6.53208	7.88027	7.03814	7.01412	6.55702	7.09386	7.05008	6.807	7.28911	10.1917
1.13877e-67	2.68289e-66	ENSOARG00000004315	11:35776073-35807792	protein_coding	ACSF2	acyl-CoA synthetase family member 2 [Source:HGNC Symbol;Acc:26101]	4.60187	5.23549	8.28351	5.33079	5.11614	5.22947	5.05025	5.18611	4.84178	3.82765	2.92323	5.97347	343.137	-0.718724	-0.215783	2.94542	0	-0.335156	-0.173547	-0.287489	-0.133645	-0.561726	-1.45997	-2.41268	3.70889	4.34252	7.39054	4.43782	4.22317	4.3365	4.15727	4.29313	3.94881	2.93467	2.03026
1.20035e-67	2.8243e-66	ENSOARG00000011582	3:94005022-94024647	protein_coding	CYP26B1	cytochrome P450, family 26, subfamily B, polypeptide 1 [Source:HGNC Symbol;Acc:20581]	6.3024	2.81395	-0.16868	1.31975	2.27561	1.17195	0.940539	2.34351	-2.33149	2.42361	2.32193	3.67521	343.029	4.86742	1.48844	-1.59556	0	0.949411	0.00833943	-0.421828	0.957404	-3.69787	0.882704	1.01641	3.75693	0.268471	-2.71415	-1.22573	-0.269868	-1.37352	-1.60493	-0.201966	-4.87697	-0.121869	-0.223547
1.38817e-67	3.26202e-66	ENSOARG00000012125	1:262614944-262690265	protein_coding			2.64767	-6.07322	-6.07322	-6.07322	-6.07322	-5.24692	-4.31925	-4.61528	-6.07322	-4.23098	-6.07322	0.88128	342.732	10.4342	-0.130616	-0.0790341	0	-0.130616	1.77746	3.24399	2.57106	-0.474955	4.41326	-0.0961654	3.30967	-5.41122	-5.41122	-5.41122	-5.41122	-4.58492	-3.65725	-3.95328	-5.41122	-3.56898	-5.41122
2.66306e-67	6.24979e-66	ENSOARG00000014307	5:77140556-77627771	protein_coding	TENM2	teneurin transmembrane protein 2 [Source:HGNC Symbol;Acc:29943]	7.10781	3.66059	3.41864	-0.810754	-1.95094	2.0133	-0.611334	0.808191	-4.53012	-4.23098	-1.68762	4.34217	341.398	7.02499	3.87055	3.11331	0	-1.78216	1.97844	-0.957099	0.602392	-4.16226	-3.86441	-2.10642	4.09488	0.647661	0.405716	-3.82368	-4.96387	-0.99963	-3.62426	-2.20474	-7.54305	-7.24391	-4.70055
2.81763e-67	6.60405e-66	ENSOARG00000020568	1:98037939-98096152	protein_coding	PDZK1	PDZ domain containing 1 [Source:HGNC Symbol;Acc:8821]	5.23071	2.32333	-5.09463	-3.53875	2.45309	1.84013	1.95849	0.608836	2.00641	6.87371	-2.85805	4.03375	341.282	8.96034	5.49273	-0.968933	0	5.62267	5.37314	5.64088	5.06794	5.61478	10.4732	2.16116	4.43661	1.52923	-5.88874	-4.33285	1.65899	1.04603	1.16439	-0.185268	1.21231	6.07961	-3.65215
2.88078e-67	6.74338e-66	ENSOARG00000012828	20:23153576-23178184	protein_coding	TFAP2B	transcription factor AP-2 beta (activating enhancer binding protein 2 beta) [Source:HGNC Symbol;Acc:11743]	4.10364	-2.00718	-5.40042	-4.93982	-6.07322	-4.87186	-6.07322	-4.77028	-4.59047	-6.07322	-4.407	1.21566	341.237	8.23517	1.80081	-1.3432	0	-3.22151	-0.22461	-3.05097	0.358056	0.0311262	-3.17006	1.81425	3.56262	-2.5482	-5.94144	-5.48084	-6.61424	-5.41288	-6.61424	-5.3113	-5.13149	-6.61424	-4.94802
3.16816e-67	7.4066e-66	ENSOARG00000017492	3:135235966-135246069	protein_coding	METTL7A		1.7427	4.79149	7.42327	3.2992	4.56456	4.50922	4.80705	4.11748	3.56938	5.66071	3.67494	5.22878	341.042	-1.46024	1.53744	4.18197	0	1.31045	1.31442	1.50172	0.829742	0.379075	2.26692	0.372324	2.18689	5.23568	7.86745	3.74338	5.00875	4.95341	5.25124	4.56166	4.01356	6.1049	4.11913
3.72744e-67	8.70292e-66	ENSOARG00000002058	AMGL01123277.1:21-2753	protein_coding			-6.07322	-3.42941	-6.07322	-6.07322	-6.07322	-6.07322	-6.07322	-6.07322	-6.07322	-6.07322	3.25026	-0.415538	340.709	-0.010355	2.93297	0.000329884	0	-0.590545	-0.46054	0.124121	-0.0262654	-0.30389	-0.00811786	10.4028	-6.0083	-3.36449	-6.0083	-6.0083	-6.0083	-6.0083	-6.0083	-6.0083	-6.0083	-6.0083	3.31518
3.748e-67	8.73975e-66	ENSOARG00000012549	17:53045233-53057033	protein_coding	HPD	4-hydroxyphenylpyruvate dioxygenase [Source:HGNC Symbol;Acc:5147]	-3.91634	0.145894	-4.91889	-6.07322	-6.07322	-5.24692	-6.07322	-6.07322	-6.07322	8.90802	-6.07322	5.19984	340.698	5.22354	5.94496	2.74228	0	-1.26444	1.21884	0.123928	0.0273176	-0.327802	16.1587	0.439156	-4.38309	-0.320864	-5.38564	-6.53998	-6.53998	-5.71368	-6.53998	-6.53998	-6.53998	8.44126	-6.53998
4.18576e-67	9.74806e-66	ENSOARG00000016664	17:2657181-2668293	protein_coding	FGG	fibrinogen gamma chain [Source:HGNC Symbol;Acc:3694]	-3.31601	3.81242	-3.98993	-0.0258407	-1.30427	-3.41966	-1.78811	-3.39839	-3.04737	12.9802	-1.52497	9.34015	340.472	-3.51434	1.8086	-5.45869	0	-3.33403	-3.48862	-2.75646	-4.60475	-4.77115	11.7378	-2.03222	-5.57453	1.5539	-6.24845	-2.28436	-3.56279	-5.67817	-4.04663	-5.65691	-5.30589	10.7217	-3.78349
5.48599e-67	1.27598e-65	ENSOARG00000011271	2:49732938-49799978	protein_coding	TMOD1	tropomodulin 1 [Source:HGNC Symbol;Acc:11871]	1.00087	1.68328	1.36855	2.0404	1.07827	1.80141	0.480307	1.17358	0.39196	-1.97377	6.7753	3.82978	339.918	-1.325	-0.277368	-1.07468	0	-0.884127	-0.293696	-2.03219	-1.27522	-1.71767	-4.74377	4.46269	0.854217	1.53663	1.22189	1.89375	0.931611	1.65475	0.333652	1.02692	0.245305	-2.12043	6.62865
8.23547e-67	1.91304e-65	ENSOARG00000016740	4:105620201-105627172	protein_coding	~TRPV6	closeto transient receptor potential cation channel, subfamily V, member 6	5.523	2.95117	4.70666	-0.317457	-0.0873097	-0.195114	-0.128524	-0.406883	0.852925	-1.61455	-3.27682	3.28336	339.086	5.76483	2.95254	4.96152	0	-0.0959836	-0.0859972	0.298325	0.276086	1.01039	-1.3118	-1.61609	4.03964	1.46781	3.2233	-1.80082	-1.57067	-1.67848	-1.61189	-1.89025	-0.63044	-3.09792	-4.76018
9.08983e-67	2.10882e-65	Addition34	1:101812445-101812974		unknown		2.87414	-6.07322	-3.53248	-6.07322	-6.07322	-6.07322	-6.07322	-6.07322	-6.07322	-6.07322	-6.07322	0.310356	338.884	10.383	-0.644247	4.42506	0	-0.644247	-0.336265	-0.0349803	0.0561888	0.110973	-0.342757	0.261906	3.7928	-5.15456	-2.61382	-5.15456	-5.15456	-5.15456	-5.15456	-5.15456	-5.15456	-5.15456	-5.15456
9.4589e-67	2.19165e-65	ENSOARG00000011350	2:174823736-174885379	protein_coding	ACMSD	aminocarboxymuconate semialdehyde decarboxylase [Source:HGNC Symbol;Acc:19288]	-4.28743	-1.30509	-6.07322	-5.06132	-6.07322	-6.07322	-6.07322	-4.26019	-5.00357	5.56886	-5.04577	1.7971	338.802	0.420954	3.0409	-2.63577	0	-2.70052	-2.86012	-2.36688	1.8925	-0.783893	10.5691	0.304517	-4.44188	-1.45954	-6.22768	-5.21577	-6.22768	-6.22768	-6.22768	-4.41464	-5.15802	5.41441	-5.20022
1.18687e-66	2.74652e-65	ENSOARG00000017134	9:42933827-42991101	protein_coding	PDE7A	phosphodiesterase 7A [Source:HGNC Symbol;Acc:8791]	5.50482	4.08186	3.28018	3.88121	5.03049	3.97227	4.27162	3.91733	4.78566	2.22532	7.51467	5.26247	338.337	1.58453	0.250834	-0.632268	0	1.19977	0.0815757	0.350383	0.00488202	0.903727	-1.5589	3.59109	4.5705	3.14753	2.34586	2.94688	4.09616	3.03794	3.33729	2.98301	3.85133	1.29099	6.58034
1.29729e-66	2.99824e-65	ENSOARG00000000450	1:102332237-102332680	protein_coding	S100A8	S100 calcium binding protein A8 [Source:HGNC Symbol;Acc:10498]	1.43542	10.6143	10.4251	-1.91812	-3.97458	-6.07322	-2.5991	-3.57762	4.11404	2.07641	-3.27682	7.83645	338.155	3.17717	9.54658	11.6705	0	-5.2214	-7.77337	-1.76464	-2.87333	4.73983	2.22736	-0.958671	3.20153	12.3804	12.1912	-0.152008	-2.20847	-4.30711	-0.832986	-1.81151	5.88015	3.84252	-1.51071
1.35977e-66	3.13867e-65	ENSOARG00000012463	14:54576851-54595688	protein_coding	GYS1	glycogen synthase 1 (muscle) [Source:HGNC Symbol;Acc:4706]	4.77355	4.80765	5.33855	4.78291	4.34677	4.68367	4.57234	4.76224	3.96416	4.02388	8.10214	5.78778	338.059	-0.0063517	-0.0196065	0.543983	0	-0.480623	-0.0536712	-0.204805	-0.0323812	-0.762848	-0.797825	3.35044	2.25653	2.29062	2.82153	2.26588	1.82975	2.16665	2.05532	2.24522	1.44714	1.50685	5.58511
1.43397e-66	3.30575e-65	ENSOARG00000013105	11:22371305-22374210	protein_coding			1.72206	0.654646	0.913652	1.06066	0.0549106	1.71476	1.73841	1.599	1.75361	3.65121	5.9208	3.2839	337.95	0.728905	-0.310872	-0.139729	0	-0.914136	0.605118	0.672014	0.58346	0.649155	2.90582	4.89091	0.857333	-0.210085	0.048921	0.195934	-0.80982	0.850032	0.873683	0.734267	0.88888	2.78648	5.05607
1.70938e-66	3.93567e-65	ENSOARG00000007497	9:54505246-54506814	pseudogene			3.01207	3.37639	4.30333	2.231	4.2204	2.45284	2.63688	2.20132	2.13284	7.20091	0.245859	4.26075	337.59	0.617241	0.646235	1.89833	0	1.4907	-0.089505	0.230315	-0.148231	-0.43072	4.80411	-2.01275	2.81925	3.18356	4.11051	2.03817	4.02757	2.26002	2.44406	2.00849	1.94001	7.00809	0.0530332
2.02061e-66	4.64639e-65	ENSOARG00000016494	17:46531749-46533173	pseudogene			4.46751	2.97997	3.26446	-0.394265	-2.63371	-0.753721	-0.222689	-1.39559	-2.59509	-2.21671	-3.20917	2.32608	337.247	4.97223	3.02762	3.66091	0	-2.65278	0.0193387	0.154891	-0.84502	-2.42584	-1.61219	-1.68228	3.95958	2.47205	2.75653	-0.902187	-3.14163	-1.26164	-0.730611	-1.90351	-3.10301	-2.72463	-3.71709
3.07312e-66	7.05773e-65	ENSOARG00000002901	AMGL01120784.1:21-5578	protein_coding			4.90601	-1.30509	-0.164598	-1.17704	0.97469	-0.695483	-0.145498	-1.53563	-0.616249	0.465903	-4.55687	2.44866	336.389	6.12685	-0.781951	0.861988	0	1.51908	0.0648795	0.834158	-0.452516	0.218577	1.4386	-1.74859	4.15841	-2.05269	-0.9122	-1.92465	0.227088	-1.44309	-0.893101	-2.28324	-1.36385	-0.281699	-5.30447
3.15807e-66	7.24371e-65	ENSOARG00000008973	4:49772197-49773693	protein_coding	EPDR1	ependymin related 1 [Source:HGNC Symbol;Acc:17572]	-3.71466	-2.00718	-2.69025	-2.06902	-3.15367	-2.27044	-2.82174	-1.32119	-2.78635	-4.54485	5.70131	2.40203	336.333	-2.62356	-0.781497	-2.08692	0	-1.9829	-0.754997	-1.29822	-0.513979	-1.60033	-3.75348	6.69887	-2.4213	-0.713824	-1.39689	-0.775656	-1.86031	-0.977078	-1.52838	-0.0278272	-1.49299	-3.25149	6.99467
3.44072e-66	7.88209e-65	ENSOARG00000007828	13:62324853-62354252	protein_coding	SNTA1	syntrophin, alpha 1 [Source:HGNC Symbol;Acc:11167]	-0.604637	-1.61384	-0.856888	0.858646	-1.48938	-1.6871	-1.47486	-0.141173	-0.0989131	-1.29935	6.65909	3.50336	336.157	-1.82402	-3.08489	-1.68263	0	-2.95765	-2.8767	-2.31874	-1.09102	-1.30245	-2.83862	5.36627	-1.45023	-2.45943	-1.70248	0.0130559	-2.33497	-2.53269	-2.32045	-0.986764	-0.944504	-2.14494	5.8135
4.42625e-66	1.01271e-64	ENSOARG00000014016	1:122520761-122678829	protein_coding	TIAM1	T-cell lymphoma invasion and metastasis 1 [Source:HGNC Symbol;Acc:11805]	7.4261	6.97564	7.10073	2.17305	1.1112	1.94671	1.62984	3.12421	2.83146	1.14831	1.58495	5.50834	335.641	5.21076	4.94496	4.91972	0	-0.92436	-0.242918	-0.616828	1.12313	0.616813	-0.568425	-0.52372	5.17574	4.72528	4.85037	-0.0773077	-1.13915	-0.303647	-0.62052	0.87385	0.581104	-1.10205	-0.665407
4.55935e-66	1.04185e-64	ENSOARG00000019977	1:183898068-184274141	protein_coding	STXBP5L	syntaxin binding protein 5-like [Source:HGNC Symbol;Acc:30757]	-0.883279	-2.00718	-2.69937	0.445464	0.464782	-0.923089	-1.30105	-0.5907	-2.52275	-3.14857	5.016	1.86082	335.58	-1.344	-2.80375	-3.40441	0	-0.295847	-1.54998	-1.69852	-1.29021	-3.44386	-3.80573	4.34796	-2.79555	-3.91945	-4.61164	-1.4668	-1.44748	-2.83536	-3.21331	-2.50297	-4.43502	-5.06084	3.10374
5.43547e-66	1.2405e-64	ENSOARG00000014598	1:203532281-203533162	protein_coding	SOX2	SRY (sex determining region Y)-box 2 [Source:HGNC Symbol;Acc:11195]	-1.70669	3.85968	4.66775	-0.417886	-3.97458	-6.07322	-6.07322	-5.03254	-6.07322	-6.07322	-6.07322	2.03692	335.22	-2.09176	3.08525	4.28801	0	-4.92736	-7.88297	-7.39658	-5.09659	-7.92113	-7.32825	-7.56182	-1.52554	4.04083	4.8489	-0.236737	-3.79343	-5.89207	-5.89207	-4.85139	-5.89207	-5.89207	-5.89207
5.88279e-66	1.34091e-64	ENSOARG00000014371	14:56027470-56033186	protein_coding			0.371322	0.654646	2.77489	-6.07322	-6.07322	-6.07322	-6.07322	-6.07322	-6.07322	-6.07322	-6.07322	0.453336	335.058	7.48997	7.33231	9.92858	0	-0.38874	-0.355873	0.132709	-0.0415932	-0.318211	0.117714	0.0390972	0.774864	1.05819	3.17843	-5.66968	-5.66968	-5.66968	-5.66968	-5.66968	-5.66968	-5.66968	-5.66968
8.42453e-66	1.91787e-64	ENSOARG00000005495	9:80589147-80590955	protein_coding	UQCRB	ubiquinol-cytochrome c reductase binding protein [Source:HGNC Symbol;Acc:12582]	3.38539	3.66946	5.35454	4.2993	4.52539	4.38537	4.13255	3.86376	3.33082	3.99222	7.5031	5.24776	334.323	-0.903788	-0.878746	1.04879	0	-0.0224324	-0.0698682	-0.179143	-0.37856	-1.14918	-0.265	3.19298	4.98485	5.26892	6.954	5.89876	6.12485	5.98483	5.73201	5.46323	4.93028	5.59168	9.10256
8.69602e-66	1.97721e-64	ENSOARG00000013118	17:62600483-62620320	protein_coding	ACADS	acyl-CoA dehydrogenase, C-2 to C-3 short chain [Source:HGNC Symbol;Acc:90]	2.20898	2.76514	6.87027	3.61465	3.73618	3.67631	3.80739	3.96867	2.42565	5.84251	5.23453	4.96779	334.258	-1.34952	-1.09565	3.27025	0	-0.123831	-0.121606	0.175589	0.348257	-1.37761	2.29881	1.6186	1.92092	2.47708	6.5822	3.32659	3.44812	3.38825	3.51932	3.68061	2.13759	5.55444	4.94647
1.30918e-65	2.97295e-64	ENSOARG00000020569	1:200086301-200151888	protein_coding	EHHADH	enoyl-CoA, hydratase/3-hydroxyacyl CoA dehydrogenase [Source:HGNC Symbol;Acc:3247]	4.07328	5.8663	5.03689	4.75597	7.80242	5.05492	5.09571	5.19652	7.3631	10.4383	5.22274	7.32871	333.419	-0.597965	0.850775	0.325918	0	2.78702	0.0798384	0.311569	0.445879	2.37358	5.74629	0.573749	2.95426	4.74728	3.91786	3.63694	6.68339	3.9359	3.97668	4.07749	6.24408	9.3193	4.10371
1.43894e-65	3.26357e-64	ENSOARG00000009590	9:57948374-57991512	protein_coding	COLEC10	collectin sub-family member 10 (C-type lectin) [Source:HGNC Symbol;Acc:2220]	-1.29106	-6.07322	-3.94519	-2.85587	1.29444	0.0582098	-0.520841	-1.48209	-4.53012	5.51194	-1.09596	1.88706	333.226	1.59029	-3.91842	-0.408266	0	4.44487	2.95743	2.37434	1.35857	-1.19316	8.36942	1.80422	-1.03436	-5.81652	-3.68849	-2.59917	1.55114	0.31491	-0.264141	-1.22539	-4.27342	5.76864	-0.839256
1.49278e-65	3.38148e-64	ENSOARG00000021086	1:101051127-101056514	protein_coding	RPTN	repetin [Source:HGNC Symbol;Acc:26809]	3.59149	-3.42941	-0.406835	-6.07322	-6.07322	-6.07322	-6.07322	-6.07322	-6.07322	-6.07322	-6.07322	1.38298	333.151	11.0936	3.95173	7.29789	0	0.428212	-0.157857	0.288228	-0.138003	-0.615896	1.0005	-0.279818	1.62211	-5.39879	-2.37622	-8.0426	-8.0426	-8.0426	-8.0426	-8.0426	-8.0426	-8.0426	-8.0426
2.46965e-65	5.58734e-64	ENSOARG00000006294	24:26629126-26630460	protein_coding			4.72694	5.02014	5.09523	4.73559	5.07916	4.988	5.00853	4.54644	4.60089	8.87259	5.44859	6.04876	332.119	0.0336611	0.0711033	0.354578	0	0.130138	0.114824	0.263966	-0.174574	-0.273814	4.16987	0.71581	4.4603	4.75351	4.8286	4.46896	4.81253	4.72136	4.74189	4.2798	4.33426	8.60595	5.18196
2.5323e-65	5.72199e-64	ENSOARG00000010837	20:38361051-38390210	protein_coding	TPMT	thiopurine S-methyltransferase [Source:HGNC Symbol;Acc:12014]	2.20616	4.23904	6.45232	2.44351	3.41202	2.34823	1.96776	1.84264	1.31685	2.99588	2.43431	3.98983	332.068	-0.289998	1.3889	3.9367	0	0.56144	-0.253678	-0.559362	-0.61606	-1.2666	0.373782	0.0642	0.0231543	2.05603	4.26931	0.260496	1.22901	0.165223	-0.215254	-0.340366	-0.866162	0.812871	0.251297
2.58896e-65	5.84279e-64	ENSOARG00000021045	7:62077980-62092965	protein_coding	GATM	glycine amidinotransferase (L-arginine:glycine amidinotransferase) [Source:HGNC Symbol;Acc:4175]	5.34087	6.42782	5.59368	5.49788	4.40438	4.20805	4.45469	4.69458	3.31634	10.5648	2.80629	7.38298	332.022	-0.175131	0.808807	0.0760302	0	-1.21501	-1.40817	-1.02096	-0.565155	-2.31756	5.26524	-2.57191	4.83295	5.91989	5.08576	4.98995	3.89646	3.70013	3.94677	4.18666	2.80842	10.0568	2.29837
3.35048e-65	7.55204e-64	ENSOARG00000019126	1:4701774-4777786	protein_coding	ASB18	ankyrin repeat and SOCS box containing 18 [Source:HGNC Symbol;Acc:19770]	-6.07322	-6.07322	-6.07322	-6.07322	-6.07322	-5.24692	-6.07322	-6.07322	-6.07322	-6.07322	3.28841	-0.329816	331.494	-0.037358	-0.175801	-0.0287283	0	-0.175801	1.85884	0.0950501	-0.0365625	-0.242615	0.14524	10.3611	-7.14086	-7.14086	-7.14086	-7.14086	-7.14086	-6.31456	-7.14086	-7.14086	-7.14086	-7.14086	2.22077
3.92545e-65	8.8371e-64	ENSOARG00000005726	11:26073940-26076153	protein_coding	SLC25A11	Ovis aries solute carrier family 25 (mitochondrial carrier; oxoglutarate carrier), member 11 (SLC25A11), nuclear gene encoding mitochondrial protein, mRNA. [Source:RefSeq mRNA;Acc:NM_001127273]	4.72152	4.64183	5.76342	4.47323	4.32938	4.26311	4.39325	4.24933	3.66519	4.31774	7.57402	5.47274	331.169	0.249581	-0.0672133	1.27911	0	-0.379761	-0.332703	-0.0824025	-0.235404	-0.942486	-0.138	3.09679	4.79552	4.71583	5.83742	4.54723	4.40339	4.33711	4.46725	4.32334	3.73919	4.39174	7.64802
5.07117e-65	1.14023e-63	ENSOARG00000006578	1:102172948-102173295	protein_coding	PRR9	proline rich 9 [Source:HGNC Symbol;Acc:32057]	8.0935	-6.07322	-6.07322	-6.07322	-6.07322	-6.07322	-6.07322	-6.07322	-6.07322	-6.07322	-4.55687	6.40835	330.645	16.4282	0.106149	-0.0260529	0	0.106149	-0.0125326	0.0408803	-0.023901	-0.119793	0.14655	4.23494	9.61634	-4.55038	-4.55038	-4.55038	-4.55038	-4.55038	-4.55038	-4.55038	-4.55038	-4.55038	-3.03403
6.61976e-65	1.48659e-63	ENSOARG00000009550	4:68833603-68834652	protein_coding	HOXA13	homeobox A13 [Source:HGNC Symbol;Acc:5102]	-5.31763	-6.07322	-6.07322	-5.23916	-3.97458	-2.51408	4.2788	2.97065	-6.07322	-6.07322	-6.07322	2.18533	330.099	-0.122856	-2.35838	-1.89211	0	0.561171	2.73231	9.63426	8.99738	-1.83583	-2.19218	-1.79209	-3.71817	-4.47376	-4.47376	-3.63969	-2.37512	-0.914614	5.87826	4.57011	-4.47376	-4.47376	-4.47376
8.86042e-65	1.98733e-63	ENSOARG00000010213	23:37599839-37713875	protein_coding	MYOM1	myomesin 1 [Source:HGNC Symbol;Acc:7613]	0.781063	2.1313	3.55663	2.90155	2.15443	3.01226	2.38078	2.23647	1.37556	-0.198807	11.182	8.17168	329.501	-3.19905	-1.15309	-0.412604	0	-1.12991	-0.448844	-1.75532	-1.96895	-2.0763	-4.76274	7.51118	-1.5632	-0.212964	1.21237	0.557293	-0.189827	0.667998	0.0365246	-0.10779	-0.968703	-2.54307	8.83772
1.56646e-64	3.50913e-63	ENSOARG00000015540	11:40690641-40707235	protein_coding	KRT23	keratin 23 (histone deacetylase inducible) [Source:HGNC Symbol;Acc:6438]	6.76557	5.88926	5.7102	-0.046369	0.655485	0.417834	-0.264878	-0.653374	-6.07322	-6.07322	-6.07322	4.53699	328.333	4.6748	3.97564	3.58406	0	-1.26477	-2.0645	-2.39604	-2.80518	-9.62671	-8.79314	-9.43852	6.44596	5.56964	5.39059	-0.365987	0.335867	0.0982162	-0.584496	-0.972992	-6.39284	-6.39284	-6.39284
1.61773e-64	3.61954e-63	ENSOARG00000017412	11:41412168-41412628	protein_coding	GAST	gastrin [Source:HGNC Symbol;Acc:4164]	-6.07322	-6.07322	-5.40042	1.69671	-3.97458	-6.07322	-6.07322	-5.33913	-5.00357	-4.67695	-6.07322	2.07633	328.267	-11.7075	-11.6763	-9.8697	0	-8.75677	-11.9087	-11.3471	-9.75543	-9.87155	-7.98126	-11.7221	-4.40665	-4.40665	-3.73385	3.36329	-2.308	-4.40665	-4.40665	-3.67256	-3.33699	-3.01037	-4.40665
1.6797e-64	3.7536e-63	ENSOARG00000008420	X:49517459-49519610	protein_coding	HSD17B10	hydroxysteroid (17-beta) dehydrogenase 10 [Source:HGNC Symbol;Acc:4800]	4.40938	4.60994	5.00803	4.82637	4.88809	4.60305	4.62833	5.35137	3.4866	9.58119	5.54412	6.60022	328.19	-0.42897	-0.32664	0.195549	0	-0.0484079	-0.438439	-0.160979	0.689897	-1.54801	5.00799	0.735582	4.75678	4.95734	5.35543	5.17377	5.23549	4.95045	4.97573	5.69877	3.834	9.92859	5.89152
1.76272e-64	3.9343e-63	ENSOARG00000020994	7:57022264-57074198	protein_coding	SLC27A2	solute carrier family 27 (fatty acid transporter), member 2 [Source:HGNC Symbol;Acc:10996]	-1.86436	4.26852	2.83199	-0.0131026	6.76936	3.02004	1.96391	-0.413581	-1.66178	8.64655	-6.07322	5.26161	328.091	-2.29301	2.89487	2.17086	0	5.39617	1.95194	1.39332	-0.53581	-2.63281	8.13625	-7.73702	-3.11956	3.01332	1.5768	-1.2683	5.51417	1.76484	0.70871	-1.66878	-2.91698	7.39136	-7.32842
1.80919e-64	4.03307e-63	ENSOARG00000002061	AMGL01127975.1:21-3403	protein_coding			-4.63826	-0.196757	3.2037	-5.33932	-3.97458	-6.07322	-5.51486	-6.07322	-4.26653	-4.67695	-6.07322	0.611954	328.038	1.57691	6.12333	8.52653	0	2.17875	-1.5031	-0.120924	-1.95276	1.37787	1.51464	-2.14289	-4.80176	-0.360256	3.0402	-5.50282	-4.13808	-6.23672	-5.67836	-6.23672	-4.43003	-4.84045	-6.23672
2.28313e-64	5.08338e-63	ENSOARG00000013700	1:266404853-266410254	protein_coding	CBR1		0.594596	4.09508	6.25827	3.43414	3.86246	2.10401	2.02231	2.14125	2.19729	3.76813	3.17313	4.02729	327.561	-2.92955	0.280912	2.83065	0	0.048179	-1.78969	-1.50631	-1.37913	-1.69065	0.463177	-0.347104	0.614936	4.11542	6.27862	3.45448	3.8828	2.12435	2.04265	2.16159	2.21763	3.78847	3.19347
2.86355e-64	6.36791e-63	ENSOARG00000002716	JH924805.1:3634-6398	protein_coding			-6.07322	-6.07322	-6.07322	-1.98892	5.80962	-6.07322	-6.07322	-6.07322	-6.07322	-6.07322	-6.07322	1.37261	327.097	-6.63785	-7.85425	-6.60955	0	5.0284	-7.60857	-6.29519	-6.68237	-7.26918	-6.72322	-6.26859	-5.19225	-5.19225	-5.19225	-1.10795	6.69059	-5.19225	-5.19225	-5.19225	-5.19225	-5.19225	-5.19225
3.76505e-64	8.36246e-63	ENSOARG00000004786	3:3347081-3520344	protein_coding	UBAC1	UBA domain containing 1 [Source:HGNC Symbol;Acc:30221]	4.38246	4.67303	5.60474	3.87918	3.55653	4.09859	3.724	3.94318	3.1614	2.40663	7.31542	5.13106	326.536	0.430598	0.811704	1.65368	0	-0.305286	0.208158	-0.221907	-0.00512872	-0.715326	-1.55402	3.38803	2.73768	3.02825	3.95996	2.2344	1.91175	2.45381	2.07922	2.29841	1.51662	0.761853	5.67064
3.99795e-64	8.86892e-63	ENSOARG00000013672	2:73957791-74044753	protein_coding	GLDC	glycine dehydrogenase (decarboxylating) [Source:HGNC Symbol;Acc:4313]	0.907626	-3.42941	-4.42611	-2.32388	-3.97458	-2.33273	-2.2722	-2.28349	-3.01479	6.05766	-1.35836	2.48673	326.413	3.55867	-0.584204	-1.90072	0	-1.18816	0.231767	0.245945	0.222446	-0.132673	8.86285	1.27245	-0.714367	-5.0514	-6.0481	-3.94588	-5.59657	-3.95473	-3.8942	-3.90549	-4.63678	4.43567	-2.98035
4.38135e-64	9.70763e-63	ENSOARG00000005516	5:15600179-15604113	protein_coding	TUBB4A	tubulin, beta 4A class IVa [Source:HGNC Symbol;Acc:20774]	1.77149	2.97997	2.96872	3.99431	4.63703	2.42979	2.544	3.18013	1.78088	7.54244	0.990668	4.41856	326.225	-2.16378	-1.05926	-0.887636	0	0.598732	-1.66869	-1.46312	-0.829261	-2.31695	3.58463	-2.93595	1.5524	2.76088	2.74963	3.77522	4.41794	2.2107	2.32491	2.96104	1.56179	7.32335	0.771577
5.11747e-64	1.13249e-62	ENSOARG00000000769	25:41211513-41249952	protein_coding		Glutamate dehydrogenase [Source:UniProtKB/TrEMBL;Acc:Q8MIP8]	4.66284	5.34194	5.06718	5.57666	6.19957	5.3578	5.23142	5.40786	4.42611	9.54558	5.21333	6.6103	325.907	-0.869112	-0.317338	-0.500072	0	0.540415	-0.213513	-0.337185	-0.169797	-1.13702	4.0322	-0.34077	3.5952	4.2743	3.99954	4.50902	5.13193	4.29017	4.16378	4.34022	3.35847	8.47794	4.14569
8.2047e-64	1.81349e-62	ENSOARG00000022938	13:54047670-54047763	miRNA	oar-mir-133	oar-mir-133 [Source:miRBase;Acc:MI0014122]	-6.07322	-6.07322	-4.12788	-3.43615	-6.07322	-6.07322	-5.09915	-4.16398	-4.94983	-6.07322	3.81012	0.21678	324.939	-4.36918	-4.00537	-0.939386	0	-4.00537	-3.9444	-1.76837	-0.879381	-1.64809	-4.65981	6.7281	-2.66203	-2.66203	-0.716685	-0.024956	-2.66203	-2.66203	-1.68795	-0.752782	-1.53863	-2.66203	7.22132
8.55497e-64	1.88862e-62	ENSOARG00000016190	11:49240308-49242692	protein_coding	ZNF750	zinc finger protein 750 [Source:HGNC Symbol;Acc:25843]	5.77597	5.59095	4.76886	-5.38472	-2.2523	-4.87186	-0.367162	-2.0578	-6.07322	-6.07322	-2.89753	3.5895	324.853	11.458	11.0375	10.4697	0	3.14249	1.36113	5.54967	4.80497	-1.32012	-1.97498	3.55878	4.60861	4.42359	3.6015	-6.55207	-3.41966	-6.03922	-1.53452	-3.22516	-7.24058	-7.24058	-4.06489
9.24126e-64	2.03766e-62	ENSOARG00000020262	3:199977235-199977624	protein_coding	H2AFJ	H2A histone family, member J [Source:HGNC Symbol;Acc:14456]	4.95791	5.86244	6.47104	3.45052	3.76234	2.96959	3.24573	2.92195	3.47222	6.301	2.03916	4.8889	324.695	1.49123	2.10878	3.01772	0	0.00807306	-0.745266	-0.212953	-0.486007	-0.261242	2.97397	-1.34292	6.31636	7.2209	7.82949	4.80897	5.12079	4.32804	4.60419	4.28041	4.83067	7.65945	3.39762
1.16754e-63	2.57127e-62	ENSOARG00000010669	X:91428174-91643394	protein_coding	FGF13	fibroblast growth factor 13 [Source:HGNC Symbol;Acc:3670]	-0.07656	-0.834869	-0.631981	-0.648228	-3.97458	0.110725	-0.693114	-0.950791	-2.33012	-4.23098	4.96976	1.78956	324.216	0.260171	0.170982	-0.217132	0	-3.12858	0.725109	-0.158109	-0.636056	-1.77653	-3.11819	5.4198	0.127673	-0.630636	-0.427748	-0.443995	-3.77035	0.314959	-0.488881	-0.746558	-2.12589	-4.02675	5.17399
1.33624e-63	2.93924e-62	ENSOARG00000020868	2:233730933-233753041	protein_coding	AK2	adenylate kinase 2 [Source:HGNC Symbol;Acc:362]	4.41653	5.07457	8.14957	4.69558	5.45127	4.40424	4.23485	4.58289	3.96143	6.39889	4.83877	5.93857	323.939	-0.333048	0.073158	3.40946	0	0.449937	-0.636709	-0.493737	-0.0994495	-1.07938	1.8138	0.108674	4.82389	5.48193	8.55694	5.10295	5.85864	4.8116	4.64221	4.99026	4.36879	6.80626	5.24614
1.71204e-63	3.76132e-62	ENSOARG00000013283	9:89757727-89765567	protein_coding	CA1	carbonic anhydrase I [Source:HGNC Symbol;Acc:1368]	-5.31763	0.973849	12.3666	0.227693	-3.97458	6.60721	5.95675	0.94435	-5.00357	-2.07611	-4.72552	9.50778	323.431	-6.21624	-0.538104	12.1531	0	-5.66016	6.425	5.35674	2.84101	-5.74823	-3.05246	-3.58616	-6.35043	-0.058957	11.3338	-0.805113	-5.00739	5.5744	4.92395	-0.0884557	-6.03637	-3.10892	-5.75833
2.34062e-63	5.13612e-62	Addition30	1:101700659-101701940		LCE6A		2.8184	-6.07322	-5.36705	-6.07322	-6.07322	-6.07322	-6.07322	-6.07322	-6.07322	-6.07322	-6.07322	0.095433	322.789	10.0425	-0.1128	1.71346	0	-0.1128	0.0578841	-0.0849679	0.0495744	0.273454	-0.226608	0.0907594	2.46113	-6.43049	-5.72433	-6.43049	-6.43049	-6.43049	-6.43049	-6.43049	-6.43049	-6.43049	-6.43049
2.83133e-63	6.20545e-62	ENSOARG00000009287	11:8797547-8807810	protein_coding	MPO	myeloperoxidase [Source:HGNC Symbol;Acc:7218]	-6.07322	-6.07322	-5.13043	-4.27849	-1.95094	-6.07322	-5.51486	-3.85565	4.36763	-0.994315	-5.04577	1.94456	322.399	-3.1292	-3.74817	-0.733834	0	1.33209	-3.44187	-1.59519	0.0120183	9.14662	2.95101	-0.219145	-7.23994	-7.23994	-6.29715	-5.44521	-3.11766	-7.23994	-6.68158	-5.02236	3.20091	-2.16103	-6.21248
3.4126e-63	7.47044e-62	ENSOARG00000021055	7:62278359-62281127	protein_coding	DUOXA2	dual oxidase maturation factor 2 [Source:HGNC Symbol;Acc:32698]	-2.40789	-1.05091	6.63489	0.791905	-1.95094	-6.07322	-1.69391	-2.40271	-4.94983	-6.07322	-6.07322	3.75261	322.016	-4.57846	-3.97065	4.48746	0	-4.89034	-9.82538	-3.91582	-4.23042	-7.35071	-9.45199	-9.28291	-2.2136	-0.856611	6.82918	0.9862	-1.75664	-5.87893	-1.49961	-2.20842	-4.75553	-5.87893	-5.87893
3.55191e-63	7.76607e-62	ENSOARG00000012794	24:18110848-18159778	protein_coding			-3.14672	0.336116	-6.07322	-6.07322	-3.97458	-6.07322	-6.07322	-5.03254	-6.07322	8.47024	-4.73684	5.54422	321.934	7.05938	5.96507	0.0639367	0	1.4838	-1.10126	0.300673	3.33845	-0.635164	16.3359	3.12703	-3.94746	-0.464628	-6.87397	-6.87397	-4.77533	-6.87397	-6.87397	-5.83328	-6.87397	7.6695	-5.53758
4.18049e-63	9.12949e-62	ENSOARG00000008072	8:14793285-15176867	protein_coding	TRDN	triadin [Source:HGNC Symbol;Acc:12261]	-2.1575	-0.834869	-4.7938	-3.51082	-6.07322	-2.13275	-2.8429	-2.01953	-1.75664	-0.944355	10.1151	7.01532	321.6	2.21518	3.78688	-0.928701	0	-2.43223	1.36411	1.13503	2.23031	2.24992	4.9856	13.5591	-4.18572	-2.86308	-6.82201	-5.53903	-8.10144	-4.16097	-4.87111	-4.04775	-3.78486	-2.97257	8.08691
5.99042e-63	1.30664e-61	ENSOARG00000014005	5:4904024-4907459	protein_coding	ARRDC2	arrestin domain containing 2 [Source:HGNC Symbol;Acc:25225]	3.49995	1.13618	1.65982	1.78761	2.24625	1.73121	1.7367	1.7801	3.33791	0.447722	5.66311	3.30571	320.862	1.70948	-0.611907	-0.168798	0	0.500791	0.0526482	-0.0416051	-0.0418287	1.6718	-1.49539	3.83736	3.17687	0.813097	1.33674	1.46453	1.92317	1.40813	1.41362	1.45702	3.01483	0.12464	5.34002
6.71254e-63	1.4624e-61	ENSOARG00000012162	6:113703808-113823694	protein_coding	ABLIM2	actin binding LIM protein family, member 2 [Source:HGNC Symbol;Acc:19195]	0.79154	2.90686	3.12131	0.160988	-0.737057	-0.88802	-0.297793	0.439144	-0.157277	-1.62081	5.35841	2.65716	320.629	0.349522	2.60331	2.70938	0	-1.05715	-1.20544	-0.726932	0.112363	-0.477621	-2.01058	4.95782	-0.26018	1.85514	2.06959	-0.890732	-1.78878	-1.93974	-1.34951	-0.612576	-1.209	-2.67253	4.30669
6.87278e-63	1.49553e-61	ENSOARG00000016375	X:109579611-109582543	protein_coding	PGRMC1	progesterone receptor membrane component 1 [Source:HGNC Symbol;Acc:16090]	4.15315	4.10819	4.52574	3.64138	5.04335	3.29884	3.90912	3.55862	2.90749	7.38974	1.86839	4.74381	320.581	0.490672	0.129438	0.854739	0	1.06489	-0.462393	0.239314	-0.110039	-0.883909	3.70406	-1.68967	6.07454	6.02958	6.44713	5.56277	6.96474	5.22023	5.83051	5.48001	4.82888	9.31113	3.78978
7.6763e-63	1.66838e-61	ENSOARG00000018139	11:50226474-50230614	protein_coding	GCGR	glucagon receptor [Source:HGNC Symbol;Acc:4192]	-1.20039	-3.42941	-4.6961	-2.9182	-3.15367	-5.24692	-4.31925	-3.99356	-2.86376	5.6445	-2.14811	1.89972	320.354	1.28139	-1.34301	-2.16823	0	-1.04561	-2.67839	-1.6054	-0.785503	-0.211554	7.99613	1.70612	-1.85574	-4.08476	-5.35145	-3.57356	-3.80902	-5.90227	-4.97461	-4.64891	-3.51911	4.98914	-2.80346
7.69828e-63	1.67117e-61	ENSOARG00000007593	8:10883260-10897885	protein_coding	C6orf58	chromosome 6 open reading frame 58 [Source:HGNC Symbol;Acc:20960]	-2.37987	6.40144	-3.71994	-5.06132	-3.15367	-2.73899	-4.31925	-4.12223	-2.11406	-2.69327	-4.00308	1.73229	320.348	2.06718	11.057	0.657084	0	1.40336	1.75001	0.444021	0.755881	2.38071	2.00676	1.02473	-4.47579	4.30552	-5.81587	-7.15724	-5.24959	-4.83491	-6.41518	-6.21816	-4.20999	-4.7892	-6.09901
7.80705e-63	1.69277e-61	ENSOARG00000006265	26:5522863-5555418	protein_coding	AGPAT5	1-acylglycerol-3-phosphate O-acyltransferase 5 [Source:HGNC Symbol;Acc:20886]	5.3729	5.55551	4.55097	3.88073	3.82324	4.35365	3.94574	4.56294	4.19435	4.33036	7.6051	5.42031	320.319	1.50229	1.58048	0.684705	0	-0.152324	0.498643	0.0855831	0.691628	0.342102	0.368324	3.73028	4.28747	4.47009	3.46554	2.79531	2.73782	3.26822	2.86032	3.47752	3.10893	3.24494	6.51968
1.05408e-62	2.28281e-61	ENSOARG00000012194	20:22055352-22072248	protein_coding	GLYATL3	glycine-N-acyltransferase-like 3 [Source:HGNC Symbol;Acc:21349]	-4.56801	-6.07322	-6.07322	-6.07322	-3.97458	-4.87186	-6.07322	-4.58974	-5.00357	4.08815	-6.07322	0.231758	319.703	2.57419	-0.21822	0.00277164	0	2.70133	2.71161	0.0339595	2.53903	2.08071	11.1849	0.0441221	-5.98269	-7.4879	-7.4879	-7.4879	-5.38926	-6.28654	-7.4879	-6.00441	-6.41824	2.67347	-7.4879
1.24491e-62	2.69287e-61	ENSOARG00000016560	24:1353748-1355723	protein_coding	IGFALS	insulin-like growth factor binding protein, acid labile subunit [Source:HGNC Symbol;Acc:5468]	-0.980519	-0.331807	-1.32554	-0.690742	-1.48938	-0.399482	-1.24683	0.957235	-2.78635	5.06615	-0.25923	1.69094	319.362	-0.286961	0.22163	-0.407951	0	-0.952791	0.187734	-0.527611	1.6377	-2.20555	5.83369	0.464559	-1.36125	-0.712537	-1.70627	-1.07147	-1.87011	-0.780211	-1.62756	0.576506	-3.16708	4.68542	-0.639959
1.2839e-62	2.77393e-61	ENSOARG00000002444	5:7311990-7329733	protein_coding			-2.78863	-1.61384	-2.9993	-4.55065	6.50779	-4.05724	-1.58372	-3.01532	-1.21929	4.91056	-3.69807	2.66379	319.299	1.84963	3.1146	1.43437	0	11.2693	0.819099	3.09018	2.4557	3.6222	9.70507	1.61903	-4.67498	-3.5002	-4.88565	-6.43701	4.62143	-5.94359	-3.47008	-4.90168	-3.10565	3.0242	-5.58442
1.56601e-62	3.37943e-61	ENSOARG00000017069	4:40332856-40361643	protein_coding			-2.15769	-0.196757	-1.85582	-0.306017	1.20573	-0.661072	-2.20763	-0.227339	2.50988	8.46985	0.388705	4.85156	318.892	-1.66166	0.156053	-1.70321	0	1.56622	-0.357199	-1.76267	1.40548	2.8078	8.73101	0.630473	-2.66257	-0.701632	-2.36069	-0.810891	0.700852	-1.16595	-2.71251	-0.732214	2.00501	7.96498	-0.11617
1.75807e-62	3.78941e-61	ENSOARG00000006485	11:43285554-43290813	protein_coding	NAGS	N-acetylglutamate synthase [Source:HGNC Symbol;Acc:17996]	-3.15428	-3.42941	-3.45058	-2.64943	4.13889	-0.897543	-0.692143	-1.10167	-1.19719	5.9323	-6.07322	2.49753	318.654	-0.983701	-2.62261	-1.46858	0	5.06538	0.536795	0.708994	0.326854	0.423262	7.03465	-5.64583	-3.81238	-4.08751	-4.10868	-3.30753	3.48079	-1.55564	-1.35024	-1.75977	-1.85529	5.27421	-6.73132
2.27328e-62	4.89413e-61	ENSOARG00000025169	4:70703241-70703668	protein_coding	CYCS	Cytochrome c [Source:UniProtKB/Swiss-Prot;Acc:P62896]	1.66581	2.73166	5.87645	2.73187	2.51593	2.76902	3.02193	2.47331	1.55207	2.5669	6.06158	4.32009	318.127	-1.02746	-0.450573	3.13854	0	-0.666562	-0.199718	0.35503	-0.125868	-1.42667	-0.154173	3.36704	3.31871	4.38456	7.52936	4.38477	4.16884	4.42192	4.67483	4.12621	3.20497	4.2198	7.71448
2.52232e-62	5.42387e-61	ENSOARG00000019116	7:20482181-20485060	protein_coding	CIDEB	cell death-inducing DFFA-like effector b [Source:HGNC Symbol;Acc:1977]	-1.50781	0.244138	-0.338677	-1.99871	3.55653	-1.71944	-0.749482	-0.881755	-1.30456	5.73674	-6.07322	2.25779	317.914	0.453104	1.97468	1.54979	0	5.29524	0.772564	1.11496	1.33454	0.586398	7.50684	-5.18757	-1.78401	-0.0320607	-0.614876	-2.27491	3.28033	-1.99563	-1.02568	-1.15795	-1.58076	5.46054	-6.34942
2.55671e-62	5.49136e-61	ENSOARG00000004357	22:23161701-23238546	protein_coding	NEURL1	neuralized E3 ubiquitin protein ligase 1 [Source:HGNC Symbol;Acc:7761]	0.0184116	-2.00718	-1.33065	1.02135	3.27339	5.72363	6.15783	4.54776	-1.57267	-0.514897	7.83733	5.5076	317.886	-1.1609	-3.65104	-2.54996	0	1.67215	4.37746	4.97404	4.52619	-2.77485	-1.78572	6.64057	-2.65628	-4.68187	-4.00533	-1.65334	0.598706	3.04894	3.48314	1.87307	-4.24736	-3.18958	5.16264
2.63951e-62	5.66253e-61	ENSOARG00000020297	7:33422436-33423128	protein_coding	RHOV	Ovis aries ras homolog family member V (RHOV), mRNA. [Source:RefSeq mRNA;Acc:NM_001163596]	3.04933	3.07647	2.76232	-4.37865	-0.0873097	-0.50854	-0.664209	-3.27088	-4.94983	-6.07322	-6.07322	1.35809	317.821	7.18133	6.71116	6.87963	0	3.53722	3.80025	3.49432	1.54884	-0.813019	-3.2086	-2.93457	4.02927	4.05641	3.74226	-3.39871	0.892633	0.471402	0.315734	-2.29093	-3.96988	-5.09328	-5.09328
2.78275e-62	5.96279e-61	ENSOARG00000013398	6:22793951-23073469	protein_coding	BANK1	B-cell scaffold protein with ankyrin repeats 1 [Source:HGNC Symbol;Acc:18233]	1.21577	2.07901	1.27769	3.86732	3.81327	3.94392	3.45216	3.01327	6.6379	2.97153	1.2499	3.9443	317.712	-2.60469	-1.67996	-2.60523	0	0.0560777	0.183574	-0.369489	-0.846126	2.87621	-0.947458	-2.53541	0.0280053	0.891242	0.0899249	2.67955	2.6255	2.75616	2.26439	1.8255	5.45013	1.78376	0.0621277
3.51368e-62	7.52019e-61	ENSOARG00000021107	7:67233591-67381578	protein_coding	C14orf37	chromosome 14 open reading frame 37 [Source:HGNC Symbol;Acc:19846]	3.78073	7.68164	1.7345	1.94152	1.77737	1.94413	2.45918	2.34546	3.0577	1.90133	1.18774	3.73833	317.234	1.83284	5.79272	-0.252484	0	-0.114629	0.00553358	0.469822	0.34747	1.11927	0.0986336	-0.80021	1.04824	4.94915	-0.997985	-0.790966	-0.955121	-0.788354	-0.273308	-0.387023	0.325218	-0.83116	-1.54475
3.74756e-62	8.01135e-61	ENSOARG00000005907	16:12393828-12408465	protein_coding	CD180	CD180 molecule [Source:HGNC Symbol;Acc:6726]	-5.33311	1.28208	-1.41119	0.84742	2.00472	1.76111	2.6229	1.2678	6.04883	3.94147	-1.18369	3.0886	317.102	-6.45622	-0.06381	-2.5381	0	0.660573	0.585691	1.45777	0.0840723	4.89453	2.80863	-1.71767	-6.32298	0.292211	-2.40106	-0.142446	1.01485	0.771247	1.63304	0.277932	5.05896	2.9516	-2.17356
3.77479e-62	8.06011e-61	ENSOARG00000011034	2:248147873-248164988	protein_coding	PADI3	peptidyl arginine deiminase, type III [Source:HGNC Symbol;Acc:18337]	3.77128	-2.00718	-0.244946	-4.65081	-3.15367	-4.51444	-6.07322	-5.03254	-4.53012	-6.07322	-6.07322	2.37276	317.087	9.02636	2.42852	4.72255	0	1.22712	-1.14347	-2.6114	-0.747881	-0.846095	-1.64432	-3.33564	3.32874	-2.44973	-0.687491	-5.09336	-3.59621	-4.95698	-6.51577	-5.47508	-4.97267	-6.51577	-6.51577
4.82002e-62	1.02799e-60	ENSOARG00000017117	20:25941199-25944752	protein_coding			-6.07322	-3.42941	-6.07322	-6.07322	5.62382	3.34668	3.41453	-1.11777	-6.07322	-6.07322	-6.07322	2.20924	316.585	0.100215	3.60176	0.0854223	0	12.7751	11.2339	11.0061	7.68817	0.617492	-0.342038	0.0885017	-5.4135	-2.76969	-5.4135	-5.4135	6.28354	4.00641	4.07425	-0.458048	-5.4135	-5.4135	-5.4135
5.00226e-62	1.06561e-60	ENSOARG00000004303	9:16484065-16484940	protein_coding	KCNK9	potassium channel, subfamily K, member 9 [Source:HGNC Symbol;Acc:6283]	-5.3236	-2.54971	2.85548	-6.07322	-6.07322	-6.07322	-6.07322	-5.31358	-6.07322	-6.07322	-6.07322	0.133999	316.509	1.70285	4.56713	9.93553	0	0.107747	-0.0714862	0.0965557	1.69338	-0.247179	0.276739	-0.091244	-3.77567	-1.00178	4.40341	-4.52529	-4.52529	-4.52529	-4.52529	-3.76565	-4.52529	-4.52529	-4.52529
5.28856e-62	1.12529e-60	ENSOARG00000005781	16:69236270-69236740	protein_coding	IRX1	iroquois homeobox 1 [Source:HGNC Symbol;Acc:14358]	2.78689	1.03001	-5.3689	-6.07322	-6.07322	-6.07322	-6.07322	-6.07322	-6.07322	-6.07322	-6.07322	0.132014	316.395	9.92663	8.66987	1.66328	0	0.571894	0.400868	-0.0751189	0.0161216	0.232245	0.00529464	-0.0835446	3.87309	2.11621	-4.2827	-4.98702	-4.98702	-4.98702	-4.98702	-4.98702	-4.98702	-4.98702	-4.98702
5.55251e-62	1.18007e-60	ENSOARG00000000122	11:24650866-24653300	protein_coding	GGT6	gamma-glutamyltransferase 6 [Source:HGNC Symbol;Acc:26891]	4.96218	4.63732	4.07918	-0.376151	-1.48938	-4.87186	-3.63846	-5.31358	-5.00357	0.594063	-6.07322	2.90443	316.295	4.70378	2.88347	3.82521	0	-3.27319	-5.70945	-3.83992	-5.93673	-6.1376	0.0599305	-7.53584	4.40342	4.07856	3.52042	-0.934908	-2.04814	-5.43062	-4.19722	-5.87234	-5.56233	0.0353059	-6.63198
6.87634e-62	1.45972e-60	ENSOARG00000020431	1:96308814-96321836	protein_coding	REG4	regenerating islet-derived family, member 4 [Source:HGNC Symbol;Acc:22977]	-6.07322	-6.07322	-3.36061	-2.5031	4.51312	6.98616	8.82082	2.38427	-5.00357	-6.07322	-6.07322	6.19583	315.856	-4.68095	-5.19917	-0.274926	0	6.38671	9.92047	11.5245	8.02884	-2.44087	-5.0913	-4.58543	-4.35061	-4.35061	-1.638	-0.780488	6.23573	8.70877	10.5434	4.10688	-3.28096	-4.35061	-4.35061
1.26909e-61	2.69091e-60	ENSOARG00000016099	5:85606652-85706150	protein_coding	MEF2C	Ovis aries myocyte enhancer factor 2C (MEF2C), mRNA. [Source:RefSeq mRNA;Acc:NM_001159277]	4.5712	4.21501	3.81852	5.04976	5.28442	5.4665	4.64826	5.01027	6.39834	4.55493	9.4444	6.78278	314.599	-0.515177	-0.61702	-1.25718	0	0.452688	0.495365	-0.46097	0.0668358	1.46266	-0.587041	4.36543	3.01539	2.6592	2.2627	3.49395	3.7286	3.91069	3.09244	3.45446	4.84253	2.99911	7.88858
1.46488e-61	3.10244e-60	ENSOARG00000009382	12:50012423-50021786	protein_coding	AGMAT	agmatine ureohydrolase (agmatinase) [Source:HGNC Symbol;Acc:18407]	-6.07322	-3.42941	-6.07322	-5.33932	3.43821	-2.22187	-2.59484	-3.57684	-6.07322	6.15024	-0.736229	2.61798	314.305	-1.8713	2.07494	-1.86922	0	9.06188	3.19737	2.89813	2.92745	-1.86247	11.7855	4.50995	-6.52845	-3.88464	-6.52845	-5.79455	2.98298	-2.6771	-3.05007	-4.03207	-6.52845	5.69502	-1.19146
1.472e-61	3.1139e-60	ENSOARG00000009715	18:53988800-54001653	protein_coding	TGM7	transglutaminase 7 [Source:HGNC Symbol;Acc:30790]	4.47015	-6.07322	-0.0532545	-3.92417	-6.07322	-4.87186	-4.5707	-4.16398	-5.00357	-3.14857	-6.07322	2.87592	314.295	9.10253	-4.60315	4.25916	0	-4.60315	-1.56048	-0.528801	-0.192518	-2.04601	0.535257	-3.38384	3.37726	-7.16611	-1.14614	-5.01706	-7.16611	-5.96475	-5.66358	-5.25686	-6.09645	-4.24146	-7.16611
1.54252e-61	3.2593e-60	ENSOARG00000004539	8:82695755-82705146	protein_coding	ACAT2	acetyl-CoA acetyltransferase 2 [Source:HGNC Symbol;Acc:94]	4.46043	4.62369	5.62519	3.83642	5.55666	3.90533	4.11783	3.78477	3.65432	8.49553	1.88674	5.61666	314.199	0.444375	0.282533	1.60558	0	1.21571	-0.261779	0.0990585	-0.165891	-0.511006	4.48535	-2.03557	3.63261	3.79587	4.79737	3.0086	4.72884	3.07751	3.29001	2.95695	2.8265	7.66772	1.05892
1.83774e-61	3.8774e-60	ENSOARG00000009594	17:69448211-69454142	protein_coding	PLA2G3	phospholipase A2, group III [Source:HGNC Symbol;Acc:17934]	2.52593	4.36993	2.72073	-3.24985	-3.97458	-3.06756	-2.61083	-3.69359	-6.07322	-4.23098	-6.07322	1.36181	313.839	5.97443	7.02995	6.09897	0	-1.49312	-0.250578	0.953369	0.537806	-3.97367	-0.0473052	-3.63737	0.938088	2.78208	1.13288	-4.83769	-5.56243	-4.65541	-4.19867	-5.28143	-7.66107	-5.81882	-7.66107
1.83929e-61	3.8774e-60	ENSOARG00000020194	1:92566785-92597203	protein_coding	MAB21L3	mab-21-like 3 (C. elegans) [Source:HGNC Symbol;Acc:26787]	2.12167	3.04955	0.47583	0.539936	5.19315	4.173	4.47661	2.05695	2.12745	8.10611	-2.18615	4.86903	313.838	1.4387	1.82854	-0.157574	0	3.97314	3.46227	3.8217	1.79395	1.51955	7.17732	-1.17251	-0.49422	0.433666	-2.14006	-2.07595	2.57726	1.55711	1.86073	-0.55894	-0.488436	5.49023	-4.80204
2.06878e-61	4.35614e-60	ENSOARG00000017257	19:51229813-51258211	protein_coding	COL7A1	collagen, type VII, alpha 1 [Source:HGNC Symbol;Acc:2214]	5.87172	4.15314	4.94522	1.58521	0.823898	1.81066	1.67926	1.61332	0.8401	0.69995	-0.15608	3.77949	313.596	4.30105	2.50118	3.40138	0	-0.833526	0.30803	0.115858	0.284419	-0.655773	-0.88005	-1.67442	2.70662	0.988029	1.78011	-1.5799	-2.34121	-1.35445	-1.48585	-1.55179	-2.32501	-2.46516	-3.32119
3.15589e-61	6.63757e-60	ENSOARG00000006792	20:6325656-6616479	protein_coding	MLIP	muscular LMNA-interacting protein [Source:HGNC Symbol;Acc:21355]	-2.37222	-2.00718	-4.42287	-2.30413	-2.2523	-4.87186	-2.8776	-2.8436	-4.94983	3.87299	7.95644	4.87254	312.73	-0.247386	-1.0915	-2.24654	0	-1.34486	-3.4718	-2.21322	-2.25614	-4.30626	4.71197	8.64711	-4.43951	-4.07448	-6.49017	-4.37142	-4.3196	-6.93916	-4.94489	-4.9109	-7.01712	1.8057	5.88915
4.63604e-61	9.73943e-60	ENSOARG00000015865	11:40879190-40885944	protein_coding	KRTAP4-8-like	LOC101113865/keratin-associated protein 4-8-lik	2.00687	-6.07322	-5.36705	-5.33932	-6.07322	-6.07322	-5.2769	-5.31358	-3.88017	-6.07322	-6.07322	0.185509	311.94	8.12221	-2.60124	-0.182543	0	-2.60124	-2.52899	0.285435	-0.0589894	0.588275	-1.49397	-1.66726	0.0371216	-8.04297	-7.3368	-7.30907	-8.04297	-8.04297	-7.24665	-7.28333	-5.84992	-8.04297	-8.04297
5.03359e-61	1.05624e-59	ENSOARG00000016415	7:4438709-4446906	protein_coding	CDO1	cysteine dioxygenase type 1 [Source:HGNC Symbol;Acc:1795]	3.85434	6.11701	3.69925	4.49715	0.303145	1.46985	2.26774	2.34141	-0.533879	8.42771	1.35518	5.32278	311.772	-0.566462	1.36724	-1.04532	0	-4.45518	-3.42815	-2.44807	-2.37078	-5.37922	3.9093	-3.34687	3.74866	6.01133	3.59357	4.39147	0.197467	1.36417	2.16207	2.23573	-0.639557	8.32203	1.2495
5.34905e-61	1.12115e-59	ENSOARG00000000118	11:42763484-42764086	protein_coding	ARL4D	ADP-ribosylation factor-like 4D [Source:HGNC Symbol;Acc:656]	3.28758	1.45616	0.0361415	2.7632	0.901264	0.525242	0.432282	2.52164	-2.44406	6.3941	-0.608889	3.33848	311.647	0.340119	-1.92178	-2.86447	0	-2.47851	-2.35138	-2.24462	-0.405932	-5.35361	3.17874	-3.44672	4.01735	2.18593	0.765912	3.49297	1.63103	1.25501	1.16205	3.25141	-1.71429	7.12387	0.120881
5.36161e-61	1.12249e-59	ENSOARG00000002132	24:25931953-25950361	protein_coding	ATP2A1	ATPase, Ca++ transporting, cardiac muscle, fast twitch 1 [Source:HGNC Symbol;Acc:811]	-0.465575	-0.647009	-2.51668	-0.611945	-3.97458	-3.23094	-2.26464	-0.184201	4.36961	-4.23098	13.7177	10.6167	311.642	-0.173063	-0.52476	-3.43239	0	-4.01455	-3.6746	-0.223742	-0.856577	3.96988	-4.57644	13.1719	-2.67097	-2.8524	-4.72207	-2.81734	-6.17997	-5.43633	-4.47003	-2.38959	2.16422	-6.43637	11.5123
6.24875e-61	1.30672e-59	ENSOARG00000000678	X:35794244-35872543	protein_coding	OTC	ornithine carbamoyltransferase [Source:HGNC Symbol;Acc:8512]	-5.33311	-1.61384	-6.07322	-3.83328	5.67014	-2.73899	1.25953	-2.94802	-6.07322	8.35417	-6.07322	4.84333	311.328	-3.94546	-0.896258	-5.75862	0	6.42069	-1.44104	3.09934	-0.560771	-5.72341	9.35257	-5.63909	-6.3295	-2.61023	-7.06961	-4.82967	4.67376	-3.73538	0.263141	-3.94441	-7.06961	7.35779	-7.06961
7.58394e-61	1.58411e-59	ENSOARG00000010943	3:163350279-163357461	protein_coding	MMP19	matrix metallopeptidase 19 [Source:HGNC Symbol;Acc:7165]	0.301502	0.336116	-0.502434	2.64835	3.17557	2.67079	3.15995	4.00682	6.73759	3.74364	-3.27682	3.8724	310.93	-2.61377	-2.46846	-3.3163	0	0.378326	-0.033014	0.230647	1.10324	3.9653	0.78873	-4.9276	-1.5477	-1.51308	-2.35163	0.799155	1.32637	0.821593	1.31075	2.15762	4.88839	1.89444	-5.12602
9.1664e-61	1.91246e-59	ENSOARG00000020385	1:16472798-16474553	protein_coding	GUCA2A	guanylate cyclase activator 2A (guanylin) [Source:HGNC Symbol;Acc:4682]	-5.03705	-3.42941	-3.27177	-2.84574	4.37417	6.84517	6.22329	3.54592	-2.12019	-0.41683	-5.03054	4.74516	310.541	-1.92759	-1.48535	-0.611083	0	6.43801	9.73429	9.14858	7.87014	0.721764	2.23407	-1.36009	-3.50172	-1.89408	-1.73644	-1.31041	5.9095	8.3805	7.75862	5.08125	-0.584855	1.1185	-3.4952
1.15094e-60	2.39857e-59	ENSOARG00000021125	7:69257516-69286338	protein_coding	DHRS7	dehydrogenase/reductase (SDR family) member 7 [Source:HGNC Symbol;Acc:21524]	4.69139	4.58203	8.19938	4.00555	5.16205	5.02077	6.53567	6.97385	4.19497	9.00943	2.85907	6.83275	310.074	0.569037	0.420179	4.09935	0	1.00035	0.946607	2.42618	2.85123	0.0918071	4.91341	-1.12857	4.12774	4.01839	7.63573	3.4419	4.59841	4.45712	5.97202	6.4102	3.63132	8.44578	2.29542
1.18124e-60	2.4589e-59	ENSOARG00000011743	15:79433635-79463046	protein_coding	MPEG1	macrophage expressed 1 [Source:HGNC Symbol;Acc:29619]	2.7496	3.24017	4.2723	5.5874	6.85511	6.47828	7.25573	6.27935	9.26004	6.9859	3.45989	6.7482	310.021	-2.89204	-2.34088	-1.36654	0	1.27509	0.751478	1.57758	0.601955	3.50268	1.50774	-2.19302	1.8992	2.38978	3.4219	4.737	6.00471	5.62788	6.40533	5.42895	8.40964	6.1355	2.60949
1.221e-60	2.53875e-59	ENSOARG00000007718	14:49964531-49965411	protein_coding	CNFN	cornifelin [Source:HGNC Symbol;Acc:30183]	0.638995	5.80927	2.19455	-5.33932	-6.07322	-6.07322	-6.07322	-6.07322	-6.07322	-4.54485	-6.07322	1.61022	309.953	6.44889	10.6018	7.77213	0	-2.28054	-2.07369	-1.73208	-1.73402	-1.80701	0.956215	-1.58658	2.21246	7.38274	3.76802	-3.76585	-4.49976	-4.49976	-4.49976	-4.49976	-4.49976	-2.97138	-4.49976
1.24908e-60	2.59206e-59	ENSOARG00000008550	12:4899195-5040338	protein_coding			5.55192	6.15381	6.42456	6.18473	8.07183	6.47097	5.84944	5.10233	3.16706	11.9243	2.69526	8.49755	309.906	-0.879661	0.330748	-0.0412202	0	2.24887	0.262108	-0.636175	-1.27727	-3.01248	5.65812	-3.79481	2.69414	3.29603	3.56678	3.32694	5.21405	3.61319	2.99166	2.24455	0.309273	9.06652	-0.162519
1.24948e-60	2.59206e-59	ENSOARG00000012053	19:42855011-42883265	protein_coding	ACOX2	acyl-CoA oxidase 2, branched chain [Source:HGNC Symbol;Acc:120]	-2.68788	-2.00718	-2.53146	-3.10935	5.01535	-0.360151	1.13292	1.42316	-0.963546	7.70286	-1.16871	4.22636	309.906	-1.17982	-0.585566	-0.925261	0	6.48035	1.50379	2.6472	2.89287	0.834814	9.08585	1.24746	-3.80358	-3.12288	-3.64715	-4.22505	3.89965	-1.47585	0.0172175	0.307464	-2.07925	6.58716	-2.28441
1.64672e-60	3.41226e-59	ENSOARG00000000534	AMGL01121125.1:21-3762	protein_coding			2.26916	-0.331807	1.05503	-6.07322	-6.07322	-6.07322	-6.07322	-6.07322	-6.07322	-6.07322	-6.07322	0.0667306	309.339	9.33376	6.83938	8.12673	0	0.111509	-0.0573213	0.088687	-0.0465154	-0.226692	0.255827	-0.0866854	1.93002	-0.670945	0.715891	-6.41236	-6.41236	-6.41236	-6.41236	-6.41236	-6.41236	-6.41236	-6.41236
1.7767e-60	3.67742e-59	ENSOARG00000009680	4:68867787-68869662	protein_coding			-1.27634	-6.07322	-6.07322	-5.11256	-6.07322	3.91568	3.32424	2.75292	-3.46707	-6.07322	3.78484	2.28311	309.183	4.92205	-2.80115	-2.48559	0	-2.80115	8.83091	8.07489	7.42309	1.19752	-2.76012	8.45804	-0.988277	-5.78516	-5.78516	-4.82449	-5.78516	4.20374	3.61231	3.04099	-3.17901	-5.78516	4.0729
2.69581e-60	5.57348e-59	ENSOARG00000016776	3:25900402-25902561	protein_coding	KCNS3	potassium voltage-gated channel, delayed-rectifier, subfamily S, member 3 [Source:HGNC Symbol;Acc:6302]	-1.10982	-0.0732743	-1.16585	0.614169	0.18436	1.6419	1.05788	1.86723	3.51198	0.00620449	6.99081	4.04906	308.327	-1.71376	-0.558293	-2.14045	0	-0.298801	0.96828	0.073067	1.16704	2.86846	-1.13827	6.23389	-1.729	-0.692453	-1.78503	-0.00500949	-0.434818	1.02273	0.438702	1.24805	2.89281	-0.612974	6.37163
3.98396e-60	8.22736e-59	ENSOARG00000011367	3:93018276-93021561	protein_coding	PAIP2B	poly(A) binding protein interacting protein 2B [Source:HGNC Symbol;Acc:29200]	3.63578	5.71177	3.48497	2.85396	1.77737	1.60044	1.9882	2.40594	1.2604	3.51908	7.0239	4.51631	307.525	0.584201	2.6536	0.48679	0	-1.28372	-1.30485	-0.999881	-0.63341	-1.65114	0.532066	3.97427	4.99423	7.07022	4.84342	4.21241	3.13582	2.95889	3.34665	3.7644	2.61885	4.87753	8.38235
5.65422e-60	1.16634e-58	ENSOARG00000019135	1:85714073-85736913	protein_coding	CELSR2	cadherin, EGF LAG seven-pass G-type receptor 2 [Source:HGNC Symbol;Acc:3231]	6.84206	5.30827	5.75342	2.93376	3.43171	3.9084	3.58571	3.34066	3.25432	2.85285	2.7971	4.87683	306.806	3.98077	2.24625	2.82652	0	0.368971	0.925696	0.663546	0.448551	0.341352	-0.0778339	-0.0932464	3.72703	2.19323	2.63838	-0.181277	0.316674	0.793367	0.470678	0.225631	0.139287	-0.262187	-0.317928
5.83047e-60	1.20134e-58	ENSOARG00000009313	X:2944925-2956273	protein_coding			4.16243	-3.42941	-3.54807	-4.813	-3.97458	-6.07322	-5.12906	-3.84421	-4.26653	-3.14857	-4.7417	1.39827	306.743	8.28752	0.923927	0.221516	0	0.319967	-2.89025	-1.51657	0.339087	0.285021	0.676561	0.242393	1.76874	-5.8231	-5.94176	-7.20669	-6.36827	-8.46691	-7.52275	-6.2379	-6.66022	-5.54226	-7.13539
6.46471e-60	1.33052e-58	ENSOARG00000013151	19:50453611-50459404	protein_coding	MST1	macrophage stimulating 1 (hepatocyte growth factor-like) [Source:HGNC Symbol;Acc:7380]	1.99936	0.654646	2.09071	1.79372	1.4824	1.01831	0.916079	1.14016	1.95651	6.7617	0.0361601	3.44148	306.531	0.232295	-1.14635	0.317849	0	-0.315614	-0.762793	-0.85629	-0.482236	0.187889	4.88813	-1.78126	0.671102	-0.673616	0.762449	0.465453	0.154135	-0.30995	-0.412183	-0.188104	0.628247	5.43344	-1.2921
7.85889e-60	1.61563e-58	ENSOARG00000007911	1:122929776-122930252	protein_coding	KRTAP11-1	Keratin-associated protein KAP11-1 [Source:UniProtKB/TrEMBL;Acc:F5AY94]	8.6263	-6.07322	-6.07322	-6.07322	-6.07322	-6.07322	-6.07322	-6.07322	-6.07322	-6.07322	-3.1186	7.01608	306.13	17.2263	0.263135	-0.00950223	0	0.263135	0.151161	-0.0159817	-0.00190871	0.0520354	0.0522597	5.38573	9.69423	-5.00528	-5.00528	-5.00528	-5.00528	-5.00528	-5.00528	-5.00528	-5.00528	-5.00528	-2.05067
8.31083e-60	1.70662e-58	ENSOARG00000011052	13:53482080-53488365	protein_coding	EEF1A2	eukaryotic translation elongation factor 1 alpha 2 [Source:HGNC Symbol;Acc:3192]	-3.28198	-3.42941	-0.0964777	0.129197	-0.0873097	1.49973	1.98046	1.44109	-2.14245	-3.19103	10.4515	7.52304	306.016	-2.73987	-3.65728	-0.4655	0	-0.206306	0.996527	1.42041	1.18973	0.66878	-1.91954	10.1024	-3.97441	-4.12184	-0.788905	-0.56323	-0.779737	0.807301	1.28804	0.748665	-2.83487	-3.88346	9.75911
8.38278e-60	1.71946e-58	ENSOARG00000004446	11:35427676-35428704	protein_coding	TOB1	transducer of ERBB2, 1 [Source:HGNC Symbol;Acc:11979]	5.62654	6.05238	6.15845	5.45301	5.36855	4.75808	5.29316	5.28254	4.02908	5.60909	8.68591	6.45941	305.998	0.171242	0.508179	0.697438	0	-0.175744	-0.724173	-0.1388	-0.167504	-1.45682	0.156683	3.25941	5.5853	6.01114	6.11721	5.41177	5.32731	4.71683	5.25191	5.2413	3.98784	5.56785	8.64467
8.56132e-60	1.75411e-58	ENSOARG00000020338	3:50014641-50018149	protein_coding		Ovis aries pancreatitis-associated protein I (LOC654331), mRNA. [Source:RefSeq mRNA;Acc:NM_001038014]	-2.27969	-6.07322	-6.07322	-3.60671	7.26492	5.52188	-4.04765	-2.30541	-6.07322	-6.07322	-6.07322	3.3796	305.955	1.02742	-5.12676	-4.25211	0	9.21132	8.45474	-1.06215	1.62053	-4.7575	-4.22612	-4.06837	-3.01087	-6.80441	-6.80441	-4.33789	6.53374	4.79069	-4.77883	-3.0366	-6.80441	-6.80441	-6.80441
9.17676e-60	1.8781e-58	ENSOARG00000004036	17:40060886-40102313	protein_coding	ETFDH	electron-transferring-flavoprotein dehydrogenase [Source:HGNC Symbol;Acc:3483]	4.83828	5.6164	7.06248	4.64388	5.04335	4.07428	4.14515	4.52278	4.29978	7.07759	7.26719	5.94362	305.812	0.185567	0.808414	2.41278	0	0.23526	-0.769585	-0.479167	-0.0961267	-0.543902	2.5363	2.61439	3.06639	3.84451	5.29059	2.872	3.27146	2.30239	2.37326	2.75089	2.5279	5.3057	5.4953
1.05732e-59	2.16146e-58	ENSOARG00000000272	1:101579898-101671014	protein_coding			2.68684	-3.42941	-6.07322	-6.07322	-6.07322	-6.07322	-6.07322	-6.07322	-6.07322	-6.07322	-6.07322	-0.02427	305.521	9.89992	3.50014	0.0521789	0	-0.0233725	0.128903	-0.0971165	0.0516922	0.31748	-0.222184	0.0717077	4.39523	-1.72101	-4.36483	-4.36483	-4.36483	-4.36483	-4.36483	-4.36483	-4.36483	-4.36483	-4.36483
1.65839e-59	3.38641e-58	ENSOARG00000024366	1:100951618-100951696	miRNA			-6.07322	-3.42941	2.67385	-6.07322	-6.07322	-6.07322	-6.07322	-6.07322	-6.07322	-6.07322	-6.07322	0.0206769	304.597	-0.0552632	3.50925	9.7399	0	-0.0142632	-0.137422	0.103474	-0.0477355	-0.262066	0.240042	-0.0633297	-2.41122	0.232593	6.33585	-2.41122	-2.41122	-2.41122	-2.41122	-2.41122	-2.41122	-2.41122	-2.41122
1.80859e-59	3.68901e-58	ENSOARG00000020295	1:93712256-93733310	protein_coding	VTCN1	V-set domain containing T cell activation inhibitor 1 [Source:HGNC Symbol;Acc:28873]	2.85331	2.32333	-2.06388	-6.07322	-6.07322	-5.24692	-5.2769	-4.33852	-5.00357	-6.07322	-6.07322	0.305867	304.419	10.1314	8.68569	5.23745	0	-0.708721	1.58294	1.80695	3.01203	1.90484	-0.127871	0.19618	3.07426	2.54428	-1.84293	-5.85227	-5.85227	-5.02597	-5.05595	-4.11757	-4.78262	-5.85227	-5.85227
1.9439e-59	3.96056e-58	ENSOARG00000010469	4:102172027-102220863	protein_coding	ATP6V0A4	ATPase, H+ transporting, lysosomal V0 subunit a4 [Source:HGNC Symbol;Acc:866]	2.65777	3.19175	-4.6961	-5.33932	-3.15367	-6.07322	-4.5707	-5.03254	1.55002	-4.08955	-1.97189	0.738037	304.271	8.13691	7.98975	0.651453	0	1.54687	-2.28019	1.01788	0.684924	6.33771	2.25973	4.5091	1.3232	1.85719	-6.03067	-6.67389	-4.48824	-7.40779	-5.90527	-6.36711	0.215456	-5.42412	-3.30646
2.0728e-59	4.21847e-58	ENSOARG00000010953	3:92173045-92241272	protein_coding	XDH	xanthine dehydrogenase [Source:HGNC Symbol;Acc:12805]	2.99448	-0.331807	4.02447	-3.62887	-3.15367	-1.96621	-3.67392	-3.44009	-1.04635	6.7989	5.81617	4.50769	304.139	7.23657	2.77222	7.3228	0	-0.134728	0.889055	0.205415	0.684379	1.90661	10.4366	9.24379	0.768584	-2.5577	1.79858	-5.85477	-5.37956	-4.1921	-5.89981	-5.66598	-3.27224	4.57301	3.59028
2.09949e-59	4.26803e-58	ENSOARG00000004999	2:239713971-239755533	protein_coding	CEP85	centrosomal protein 85kDa [Source:HGNC Symbol;Acc:25309]	3.47545	2.79786	3.64473	3.58509	3.17557	3.46504	3.80776	3.50303	3.74119	4.05943	7.01977	4.67481	304.113	-0.109187	-0.573651	0.0988097	0	-0.195584	-0.0544729	0.212569	-0.0818849	0.192707	0.53529	3.47174	2.112	1.43441	2.28128	2.22164	1.81212	2.10158	2.44431	2.13958	2.37774	2.69598	5.65632
2.13859e-59	4.34267e-58	ENSOARG00000015140	11:40538814-40544787	protein_coding	KRT26	keratin 26 [Source:HGNC Symbol;Acc:30840]	5.25244	-6.07322	-6.07322	-6.07322	-6.07322	-6.07322	-6.07322	-6.07322	-6.07322	-6.07322	-5.04577	3.91314	304.075	13.4206	-0.218518	-0.0880759	0	-0.218518	-0.416984	0.267726	-0.105772	-0.595554	0.558973	3.07586	4.63891	-6.68675	-6.68675	-6.68675	-6.68675	-6.68675	-6.68675	-6.68675	-6.68675	-6.68675	-5.6593
2.17765e-59	4.41708e-58	ENSOARG00000004210	17:57393202-57480359	protein_coding	NOS1	Nitric oxide synthase [Source:UniProtKB/TrEMBL;Acc:Q9XSY2]	1.85531	-1.05091	-2.05741	-1.03885	-3.15367	-0.212296	0.830711	-0.300134	0.378397	-1.93221	6.55389	3.45443	304.037	2.07664	-0.868374	-1.4588	0	-3.0474	0.0552643	1.19469	-0.0365178	0.940065	-1.28853	6.72865	-0.279568	-3.18578	-4.19229	-3.17373	-5.28855	-2.34717	-1.30417	-2.43501	-1.75648	-4.06709	4.41902
2.35696e-59	4.77546e-58	ENSOARG00000007347	18:67490430-67509003	protein_coding	ASPG-like1		2.20761	-0.331807	0.97992	-5.38472	-3.97458	-5.24692	-6.07322	-6.07322	-6.07322	2.83456	-6.07322	0.596788	303.875	7.52894	5.44886	6.4123	0	1.64055	0.534159	-1.77584	-1.81008	-1.81781	8.38092	-1.91062	0.133787	-2.40563	-1.0939	-7.45854	-6.0484	-7.32074	-8.14704	-8.14704	-8.14704	0.760744	-8.14704
3.51393e-59	7.11172e-58	ENSOARG00000002701	JH923067.1:2795-5067	protein_coding			0.00274918	-2.00718	0.162396	0.709026	1.53189	0.501045	0.816122	1.05145	5.69653	3.0921	-0.542167	2.6185	303.055	-0.539896	-2.93175	-0.55811	0	0.647337	-0.371764	0.175318	0.364845	4.82857	2.4194	-1.24117	-0.274641	-2.28457	-0.114994	0.431636	1.2545	0.223655	0.538732	0.774058	5.41914	2.81471	-0.819556
5.01255e-59	1.01335e-57	ENSOARG00000006444	11:28880149-28928678	protein_coding	MYH13	myosin, heavy chain 13, skeletal muscle [Source:HGNC Symbol;Acc:7571]	-4.35919	-1.30509	-1.19252	-3.20946	-3.15367	-2.95331	-2.90541	-1.88749	-3.46047	-4.08955	11.4168	8.30044	302.325	0.215847	1.58265	1.46328	0	-0.337853	-0.464629	0.521359	0.266929	-1.2349	-0.662899	13.5204	-6.89797	-3.84388	-3.73131	-5.74825	-5.69246	-5.49209	-5.4442	-4.42628	-5.99926	-6.62833	8.87801
6.03452e-59	1.2186e-57	Addition24	1:101634038-101634316		LCE1-like1		2.62802	-2.54971	-6.07322	-6.07322	-6.07322	-6.07322	-6.07322	-6.07322	-6.07322	-6.07322	-5.04577	-0.0294126	301.944	9.91918	4.48875	0.0675149	0	0.0293719	0.216202	-0.132201	0.0687587	0.455295	-0.278617	2.8393	4.47486	-0.702865	-4.22638	-4.22638	-4.22638	-4.22638	-4.22638	-4.22638	-4.22638	-4.22638	-3.19892
6.85136e-59	1.38202e-57	ENSOARG00000004779	6:101704087-101893341	protein_coding	HSD17B11	hydroxysteroid (17-beta) dehydrogenase 11 [Source:HGNC Symbol;Acc:22960]	2.77552	3.89034	3.02915	4.49825	7.86289	4.68641	4.81597	4.1672	4.34729	9.09691	1.49745	6.21089	301.683	-1.82369	-0.828203	-1.53725	0	3.14502	0.0805156	0.217197	-0.421807	-0.271779	4.68422	-2.49288	2.79002	3.90484	3.04365	4.51275	7.87739	4.70091	4.83047	4.18169	4.36179	9.11141	1.51195
7.76399e-59	1.56438e-57	ENSOARG00000015783	2:200539657-200737261	protein_coding	SATB2	SATB homeobox 2 [Source:HGNC Symbol;Acc:21637]	1.5554	1.57418	-3.67691	-2.00519	-1.30427	6.97658	6.99733	4.49754	-1.41516	0.324947	-2.34853	5.13911	301.426	3.66261	3.035	-1.28562	0	0.133441	9.13015	9.13302	7.96694	0.770141	1.94712	-0.361171	-0.0519864	-0.0332059	-5.2843	-3.61258	-2.91166	5.36919	5.38994	2.89015	-3.02255	-1.28244	-3.95592
8.24874e-59	1.66022e-57	ENSOARG00000017011	9:42118013-42291040	protein_coding	CYP7B1	cytochrome P450, family 7, subfamily B, polypeptide 1 [Source:HGNC Symbol;Acc:2652]	4.56982	4.97078	6.40184	5.44344	5.9975	6.62965	5.39872	5.20157	5.71462	9.12987	2.28078	6.47555	301.302	-0.81797	-0.646438	0.953897	0	0.380463	1.11501	0.00811815	-0.200706	0.202362	3.7093	-3.09199	2.12224	2.5232	3.95426	2.99587	3.54993	4.18207	2.95114	2.75399	3.26704	6.68229	-0.166796
8.30719e-59	1.67014e-57	ENSOARG00000010072	12:43481474-43484092	protein_coding	ERRFI1	ERBB receptor feedback inhibitor 1 [Source:HGNC Symbol;Acc:18185]	3.52866	1.75168	4.41065	3.57527	1.71445	2.86616	3.4553	3.6011	1.05579	7.80653	2.75845	4.78628	301.287	-0.118055	-2.04678	0.746135	0	-2.08409	-0.880978	-0.197878	0.0183051	-2.56589	4.16613	-0.880549	2.96208	1.18511	3.84408	3.0087	1.14788	2.29959	2.88873	3.03453	0.489222	7.23996	2.19188
1.39683e-58	2.80521e-57	ENSOARG00000018303	1:77232070-77255046	protein_coding			3.3879	4.44415	3.07337	5.22664	3.9741	5.00459	5.00258	5.75091	9.33121	5.01914	4.28928	6.25163	300.22	-1.75014	-0.750874	-2.16027	0	-1.22111	-0.106253	-0.215996	0.667485	4.19483	-0.255222	-0.958518	2.23539	3.29164	1.92086	4.07413	2.82159	3.85208	3.85007	4.5984	8.1787	3.86664	3.13677
1.5609e-58	3.13124e-57	ENSOARG00000007339	25:28829649-28850317	protein_coding	PLA2G12B	phospholipase A2, group XIIB [Source:HGNC Symbol;Acc:18555]	-1.8789	-3.42941	-6.07322	-6.07322	3.63223	1.42086	0.288097	-4.03417	-6.07322	6.18306	-6.07322	2.65732	299.992	6.06948	3.01881	0.0241649	0	10.1999	8.46273	7.80944	3.79869	-0.131527	13.1735	0.134977	-1.11279	-2.6633	-5.30711	-5.30711	4.39834	2.18697	1.05421	-3.26806	-5.30711	6.94917	-5.30711
1.59245e-58	3.19103e-57	ENSOARG00000000199	JH921680.1:4097-4818	protein_coding			-6.07322	-6.07322	-4.69425	-5.38472	2.65645	4.13164	7.02893	1.65221	-6.07322	-6.07322	-6.07322	4.56708	299.951	-1.6767	-2.21901	0.667026	0	7.50896	10.2746	12.858	9.8825	-1.49121	-2.12586	-1.57683	-4.24186	-4.24186	-2.8629	-3.55336	4.48781	5.963	8.86029	3.48357	-4.24186	-4.24186	-4.24186
1.68798e-58	3.37873e-57	ENSOARG00000003299	10:74974925-75003706	protein_coding	PEPT1	Ovis aries proton-dependent gastrointestinal peptide transporter (PEPT1), mRNA. [Source:RefSeq mRNA;Acc:NM_001009758]	3.88327	1.45616	2.96466	-3.45384	4.2204	-2.34288	-4.46709	-5.34937	-3.46707	-0.8442	-6.07322	2.06792	299.831	6.89507	4.15764	5.90482	0	6.92522	0.595966	-1.17144	-2.4587	-0.832933	2.76051	-4.19118	2.79648	0.369372	1.87788	-4.54063	3.13361	-3.42966	-5.55388	-6.43616	-4.55385	-1.93098	-7.16001
1.99472e-58	3.98834e-57	ENSOARG00000020856	7:48680866-48853721	protein_coding	LIPC	lipase, hepatic [Source:HGNC Symbol;Acc:6619]	-0.348116	1.5359	-1.33064	2.76603	-0.245099	-0.483278	-0.196167	0.1654	0.168399	6.22212	-0.854556	3.02985	299.488	-2.74619	-1.74213	-4.27744	0	-3.53219	-3.53698	-2.89196	-2.76195	-2.89529	3.36745	-3.55596	-1.10514	0.778881	-2.08766	2.00901	-1.00212	-1.2403	-0.95319	-0.591624	-0.588624	5.4651	-1.61158
2.02606e-58	4.04657e-57	ENSOARG00000018036	24:1743961-1770871	protein_coding	ECI1	enoyl-CoA delta isomerase 1 [Source:HGNC Symbol;Acc:2703]	2.94506	2.76514	3.80457	2.33124	4.26132	2.68134	3.29584	3.0051	2.43733	6.80689	4.15916	4.15836	299.456	0.611598	0.0651282	1.48275	0	1.56233	0.225734	0.982786	0.695077	-0.0569165	4.45558	1.82334	1.08271	0.902789	1.94222	0.46889	2.39897	0.818991	1.43349	1.14274	0.574974	4.94454	2.29681
2.09809e-58	4.18585e-57	ENSOARG00000010219	21:26626990-26628805	protein_coding			1.33028	-6.07322	-6.07322	-6.07322	-6.07322	-6.07322	-6.07322	-6.07322	-6.07322	-6.07322	-6.07322	0.0776781	299.384	9.69917	-0.774032	-0.0722522	0	-0.774032	-0.748635	0.382828	-0.113349	-0.719955	0.383606	0.0475799	1.13241	-6.27109	-6.27109	-6.27109	-6.27109	-6.27109	-6.27109	-6.27109	-6.27109	-6.27109	-6.27109
2.17111e-58	4.3268e-57	ENSOARG00000002314	AMGL01125827.1:21-2184	protein_coding			-6.07322	-6.07322	-5.40042	-5.23916	-1.48938	3.75798	6.2822	4.18387	-6.07322	-4.54485	-6.07322	4.34334	299.314	-1.93053	-2.36269	-0.280961	0	3.19076	9.06977	11.7104	11.2314	-1.92906	0.743435	-1.84481	-6.88716	-6.88716	-6.21436	-6.05309	-2.30331	2.94404	5.46827	3.36993	-6.88716	-5.35878	-6.88716
2.22458e-58	4.42852e-57	ENSOARG00000003757	19:14739709-14748970	protein_coding	HHATL	hedgehog acyltransferase-like [Source:HGNC Symbol;Acc:13242]	-0.0944837	-1.30509	1.89173	-0.491015	-2.2523	-1.27735	-1.15507	-1.08522	-4.59047	-3.14857	5.99399	2.89984	299.264	0.64409	-1.2695	2.38884	0	-2.24197	-0.0609478	-0.101513	0.116701	-3.63214	-3.10132	6.67174	-0.978105	-2.18871	1.00811	-1.37464	-3.13593	-2.16097	-2.03869	-1.96884	-5.47409	-4.03219	5.11037
2.23072e-58	4.4359e-57	ENSOARG00000019985	1:91106086-91144694	protein_coding	DENND2C	DENN/MADD domain containing 2C [Source:HGNC Symbol;Acc:24748]	5.70321	5.83512	5.92815	2.25578	1.20573	1.12975	1.19379	1.90602	-0.0704253	1.2411	2.58318	4.20021	299.258	3.45104	3.6482	3.7117	0	-0.985659	-1.09409	-0.996326	-0.0107658	-2.25075	-0.969459	0.389539	4.11873	4.25064	4.34367	0.671298	-0.378755	-0.454732	-0.390693	0.321538	-1.65491	-0.343383	0.998694
[truncated: 10,747 more rows]

## Sheet: Table S3_clustered genes
Cluster	PValue	FDR	ID	chr	Transcript Biotype	ensembl name	Description	skin_ave_cpm	tonsil_ave_cpm	rumen_ave_cpm	abomasum_ave_cpm	duodenum_ave_cpm	caecum_ave_cpm	colon_ave_cpm	rectum_ave_cpm	spleen_ave_cpm	liver_ave_cpm	muscle_ave_cpm	Skin_logFC	Tonsil_logFC	Rumen_logFC	Abomasum_logFC	Duodenum_logFC	Caecum_logFC	Colon_logFC	Rectum_logFC	Spleen_logFC	Liver_logFC	Muscle_logFC	skin_logFPKM	tonsil_logFPKM	rumen_logFPKM	abomasum_logFPKM	duodenum_logFPKM	caecum_logFPKM	colon_logFPKM	rectum_logFPKM	spleen_logFPKM	liver_logFPKM	muscle_logFPKM
[truncated: 640 more rows]

[truncated: 2 more sheets: Table_S4_enrichments, Table_S5_pig-sheep gene]
